# Supplementary material for: Human Nup98 regulates the localization and activity of DExH/D-box helicase DHX9
Source: eLife. 2017 Feb 21;6:e18825. doi: 10.7554/eLife.18825 (PMC5338925; doi:10.7554/eLife.18825)
Supplement: Supplementary file 1. — (A) Complete mass spectrometry data exported from PEAKS software. (B) List of plasmids. (C) List of shRNAs. (D) List of primers. DOI: http://dx.doi.org/10.7554/eLife.18825.028 [file elife-18825-supp1.xlsx]

## Sheet: Supplementary file 1A
Supplementary file 1A: Complete mass spectrometry data exported from PEAKS software.
Round 1: GFP-Nup98 immunoprecipitation form HEK293T cell lysates
Accession	Mass	Score (%)	Coverage(%)	Query matched	Description
gi|41584442	273.447	99	6	15	fatty acid synthase [Homo sapiens]
gi|41872631	273.424	99	6	15	fatty acid synthase [Homo sapiens]
gi|119610151	273.423	99	6	15	fatty acid synthase [Homo sapiens]
gi|68533031	277.368	99	6	15	FASN variant protein [Homo sapiens]
gi|38196957	84.211	99	10	9	FASN protein [Homo sapiens]
gi|62988906	235.175	99	6	15	unknown [Homo sapiens]
gi|18105007	242.981	99	6	15	carbamoylphosphate synthetase 2/aspartate transcarbamylase/dihydroorotase [Homo sapiens]
gi|1228049	242.914	99	6	15	multifunctional protein CAD [Homo sapiens]
gi|33989959	93.48	96	7	7	CAD protein [Homo sapiens]
gi|179770	52.419	89	6	4	CAD [Homo sapiens]
gi|133777088	216.181	93	3	5	SNRNP200 protein [Homo sapiens]
gi|20521660	231.712	93	2	5	KIAA0788 protein [Homo sapiens]
gi|40217847	244.505	93	2	6	activating signal cointegrator 1 complex subunit 3-like 1 [Homo sapiens]
gi|119591778	243.221	93	2	5	activating signal cointegrator 1 complex subunit 3-like 1, isoform CRA_a [Homo sapiens]
gi|45861372	244.531	93	2	5	200 kDa U5 snRNP-specific spliceosomal protein [Homo sapiens]
gi|169218225	194.322	92	2	4	PREDICTED: hypothetical protein, partial [Homo sapiens]
gi|3255965	194.478	92	2	4	U5 snRNP-specific 200kD protein [Homo sapiens]
gi|10436768	207.191	92	2	4	unnamed protein product [Homo sapiens]
gi|42406352	208.427	92	2	4	SNRNP200 protein [Homo sapiens]
gi|14043179	150.026	91	2	3	SNRNP200 protein [Homo sapiens]
gi|4758012	191.613	99	6	9	clathrin heavy chain 1 [Homo sapiens]
gi|34364629	191.523	99	6	9	hypothetical protein [Homo sapiens]
gi|119614803	192.057	99	6	9	clathrin, heavy polypeptide (Hc), isoform CRA_c [Homo sapiens]
gi|40788952	192.685	99	6	9	KIAA0034 [Homo sapiens]
gi|119623452	180.295	99	3	4	clathrin, heavy polypeptide-like 1, isoform CRA_b [Homo sapiens]
gi|108860681	187.002	99	3	4	clathrin, heavy polypeptide-like 1 [Homo sapiens]
gi|11935049	66.067	99	6	4	keratin 1 [Homo sapiens]
gi|119395750	66.039	99	6	4	keratin 1 [Homo sapiens]
gi|189054178	66.02	99	6	4	unnamed protein product [Homo sapiens]
gi|425518	50.602	87	4	2	anti-colorectal carcinoma heavy chain [Homo sapiens]
gi|1806048	140.877	99	10	15	nuclear DNA helicase II [Homo sapiens]
gi|100913206	140.958	99	10	15	DEAH (Asp-Glu-Ala-His) box polypeptide 9 [Homo sapiens]
gi|119611543	114.118	99	10	12	DEAH (Asp-Glu-Ala-His) box polypeptide 9, isoform CRA_a [Homo sapiens]
gi|116283708	66.735	99	12	9	DHX9 protein [Homo sapiens]
gi|62020087	67.106	99	12	9	DHX9 protein [Homo sapiens]
gi|33878473	67.447	99	12	9	DHX9 protein [Homo sapiens]
gi|193788434	59.948	99	7	4	unnamed protein product [Homo sapiens]
gi|37748329	43.127	96	8	3	DHX9 protein [Homo sapiens]
gi|81294349	47.683	96	7	3	DHX9 protein [Homo sapiens]
gi|39645240	78.382	99	15	12	HNRPU protein [Homo sapiens]
gi|16041796	79.716	99	15	12	HNRPU protein [Homo sapiens]
gi|55859528	79.844	99	15	12	heterogeneous nuclear ribonucleoprotein U (scaffold attachment factor A) [Homo sapiens]
gi|193785231	83.085	99	14	12	unnamed protein product [Homo sapiens]
gi|194386122	86.861	99	14	12	unnamed protein product [Homo sapiens]
gi|32358	88.946	99	13	12	hnRNP U protein [Homo sapiens]
gi|14141161	88.98	99	13	12	heterogeneous nuclear ribonucleoprotein U isoform b [Homo sapiens]
gi|3202000	90.48	99	13	12	scaffold attachment factor A [Homo sapiens]
gi|74136883	90.585	99	13	12	heterogeneous nuclear ribonucleoprotein U isoform a [Homo sapiens]
gi|33187705	57.663	99	16	10	unknown [Homo sapiens]
gi|22028256	58.323	99	16	10	Similar to heterogeneous nuclear ribonucleoprotein U (scaffold attachment factor A) [Homo sapiens]
gi|55859526	61.75	99	15	10	heterogeneous nuclear ribonucleoprotein U (scaffold attachment factor A) [Homo sapiens]
gi|119597533	62.494	99	15	10	heterogeneous nuclear ribonucleoprotein U (scaffold attachment factor A), isoform CRA_b [Homo sapiens]
gi|425518	50.602	99	7	3	anti-colorectal carcinoma heavy chain [Homo sapiens]
gi|24474791	95.372	97	4	3	small nuclear ribonucleoprotein component [Homo sapiens]
gi|194380910	103.822	97	3	3	unnamed protein product [Homo sapiens]
gi|217272894	105.384	97	3	3	elongation factor Tu GTP binding domain containing 2 isoform b [Homo sapiens]
gi|48145665	109.46	97	3	3	U5-116KD [Homo sapiens]
gi|12803113	109.478	97	3	3	Elongation factor Tu GTP binding domain containing 2 [Homo sapiens]
gi|217272892	109.436	97	3	3	elongation factor Tu GTP binding domain containing 2 isoform a [Homo sapiens]
gi|158259677	109.476	97	3	3	unnamed protein product [Homo sapiens]
gi|40788951	109.893	97	3	3	KIAA0031 [Homo sapiens]
gi|193785141	61.052	71	3	2	unnamed protein product [Homo sapiens]
gi|194386932	108.211	71	2	2	unnamed protein product [Homo sapiens]
gi|119585240	127.883	77	2	3	DEAH (Asp-Glu-Ala-His) box polypeptide 30, isoform CRA_c [Homo sapiens]
gi|20336290	129.438	77	2	3	DEAH (Asp-Glu-Ala-His) box polypeptide 30 isoform 2 [Homo sapiens]
gi|158255968	129.484	77	2	3	unnamed protein product [Homo sapiens]
gi|20336294	133.938	77	2	3	DEAH (Asp-Glu-Ala-His) box polypeptide 30 isoform 1 [Homo sapiens]
gi|40788976	135.868	77	2	3	KIAA0890 protein [Homo sapiens]
gi|119585237	140.491	77	2	3	DEAH (Asp-Glu-Ala-His) box polypeptide 30, isoform CRA_a [Homo sapiens]
gi|15207794	307.377	71	1	3	guanine nucleotide exchange factor Lbc [Homo sapiens]
gi|21493029	307.55	71	1	3	A-kinase anchor protein 13 isoform 2 [Homo sapiens]
gi|31563330	307.845	71	1	3	A-kinase anchor protein 13 isoform 1 [Homo sapiens]
gi|26996545	96018.4	99.1	13.48	18	Nucleoporin 98kDa [Homo sapiens]
gi|21264369	96074.5	99.1	13.48	18	nucleoporin 98kD isoform 2 [Homo sapiens]_x0001_gi|1184173|gb|AAC50366.1| nucleoporin 98 [Homo sapiens]_x0001_gi|119622969|gb|EAX02564.1| nucleoporin 98kDa, isoform CRA_c [Homo sapiens]
gi|114635699	96088.5	99.1	13.48	18	PREDICTED: nucleoporin 98kD isoform 3 [Pan troglodytes]
gi|56549643	97836.4	99.1	13.23	18	nucleoporin 98kD isoform 3 [Homo sapiens]_x0001_gi|11414896|dbj|BAB18537.1| nucleoporin [Homo sapiens]_x0001_gi|119622970|gb|EAX02565.1| nucleoporin 98kDa, isoform CRA_d [Homo sapiens]
gi|114635701	97850.4	99.1	13.23	18	PREDICTED: nucleoporin 98kD isoform 2 [Pan troglodytes]
gi|158259225	97952.5	99.1	13.23	18	unnamed protein product [Homo sapiens]
gi|119622966	141406	99.1	9.32	18	nucleoporin 98kDa, isoform CRA_a [Homo sapiens]_x0001_gi|119622968|gb|EAX02563.1| nucleoporin 98kDa, isoform CRA_a [Homo sapiens]
gi|119622971	143168	99.1	9.21	18	nucleoporin 98kDa, isoform CRA_e [Homo sapiens]
gi|109107673	157151	99.1	8.43	18	PREDICTED: similar to nucleoporin 98kD isoform 1 [Macaca mulatta]
gi|114635693	184543	99.1	7.31	18	PREDICTED: nucleoporin 98kD isoform 8 [Pan troglodytes]
gi|114635695	187176	99.1	7.18	18	PREDICTED: nucleoporin 98kD isoform 4 [Pan troglodytes]
gi|56549645	187198	99.1	7.18	18	nucleoporin 98kD isoform 4 [Homo sapiens]
gi|33860189	187789	99.1	7.17	18	RecName: Full=Nuclear pore complex protein Nup98-Nup96; Contains: RecName: Full=Nuclear pore complex protein Nup98; AltName: Full=Nucleoporin Nup98; AltName: Full=98 kDa nucleoporin; Contains: RecName: Full=Nuclear por
gi|114635687	188882	99.1	7.13	18	PREDICTED: nucleoporin 98kD isoform 1 [Pan troglodytes]
gi|114635697	191471	99.1	7.07	18	PREDICTED: nucleoporin 98kD isoform 5 [Pan troglodytes]
gi|119622967	191569	99.1	7.03	18	nucleoporin 98kDa, isoform CRA_b [Homo sapiens]
gi|18032249	195844	99.1	6.89	18	NUP196 nucleoporin [Homo sapiens]
gi|114635689	195854	99.1	6.89	18	PREDICTED: nucleoporin 98kD isoform 7 [Pan troglodytes]
gi|21264365	195816	99.1	6.89	18	nucleoporin 98kD isoform 1 [Homo sapiens]
gi|114635691	197616	99.1	6.82	18	PREDICTED: nucleoporin 98kD isoform 6 [Pan troglodytes]
gi|73988049	95899.3	99.1	11.75	17	PREDICTED: similar to nucleoporin 98kD isoform 2 isoform 3 [Canis familiaris]
gi|73988051	97661.2	99.1	11.54	17	PREDICTED: similar to nucleoporin 98kD isoform 3 isoform 4 [Canis familiaris]
gi|4545101	177411	99.1	6.9	17	Nup98-Nup96 precursor splice variant 1 [Homo sapiens]
gi|4545099	186088	99.1	6.6	17	Nup98-Nup96 precursor [Homo sapiens]
gi|73988053	175908	99.1	6.64	17	PREDICTED: similar to nucleoporin 98kD isoform 4 isoform 5 [Canis familiaris]
gi|73988059	184616	99.1	6.35	17	PREDICTED: similar to nucleoporin 98kD isoform 1 isoform 8 [Canis familiaris]
gi|73988057	186378	99.1	6.29	17	PREDICTED: similar to Nuclear pore complex protein Nup98-Nup96 precursor isoform 7 [Canis familiaris]
gi|73988055	187028	99.1	6.26	17	PREDICTED: similar to nucleoporin 98kD isoform 4 isoform 6 [Canis familiaris]
gi|194213495	195464	99.1	6	17	PREDICTED: nucleoporin 98kDa [Equus caballus]
gi|73988047	195737	99.1	6	17	PREDICTED: similar to nucleoporin 98kD isoform 1 isoform 2 [Canis familiaris]
gi|73988061	197499	99.1	5.94	17	PREDICTED: similar to nucleoporin 98kD isoform 1 isoform 1 [Canis familiaris]
gi|194376918	70942.7	99.1	15.62	14	unnamed protein product [Homo sapiens]
gi|74216719	91144.1	99.1	11.15	15	unnamed protein product [Mus musculus]
gi|194673344	95816.2	99.1	10.46	15	PREDICTED: nucleoporin 98kDa isoform 2 [Bos taurus]
gi|1709401	97809.3	99.1	10.25	15	RecName: Full=Nuclear pore complex protein Nup98; AltName: Full=Nucleoporin Nup98; AltName: Full=98 kDa nucleoporin_x0001_gi|794020|gb|AAC42054.1| nucleoporin [Rattus norvegicus]
gi|149068657	100397	99.1	10.01	15	nucleoporin 98, isoform CRA_c [Rattus norvegicus]
gi|74138803	103001	99.1	9.76	15	unnamed protein product [Mus musculus]
gi|149068656	107206	99.1	9.38	15	nucleoporin 98, isoform CRA_b [Rattus norvegicus]
gi|148684635	107175	99.1	9.38	15	nucleoporin 98, isoform CRA_a [Mus musculus]
gi|187951821	123044	99.1	8.21	15	Nup98 protein [Mus musculus]
gi|219519796	123025	99.1	8.21	15	Nup98 protein [Mus musculus]
gi|39930413	124806	99.1	8.09	15	nucleoporin 98 [Mus musculus]_x0001_gi|34784276|gb|AAH57608.1| Nucleoporin 98 [Mus musculus]_x0001_gi|86577752|gb|AAI12913.1| Nucleoporin 98 [Mus musculus]_x0001_gi|112180496|gb|AAH50911.1| Nucleoporin 98 [Mus musculus]
gi|148684636	127443	99.1	7.92	15	nucleoporin 98, isoform CRA_b [Mus musculus]
gi|207028853	197281	99.1	5.29	15	nucleoporin 98 [Rattus norvegicus]_x0001_gi|149068655|gb|EDM18207.1| nucleoporin 98, isoform CRA_a [Rattus norvegicus]
gi|148684637	197325	99.1	5.29	15	nucleoporin 98, isoform CRA_c [Mus musculus]
gi|126327982	195373	99	4.67	13	PREDICTED: similar to facilitated urea transporter [Monodelphis domestica]
gi|209447290	17180.5	98.9	36.84	7	Chain A, Crystal Structure Of The C-Terminal Domain Of Hnup98_x0001_gi|209447292|pdb|2Q5Y|C Chain C, Crystal Structure Of The C-Terminal Domain Of Hnup98
gi|209447289	17519.8	98.9	36.13	7	Chain A, Crystal Structure Of The C-Terminal Domain Of Hnup98
gi|23200267	21173.6	98.9	29.95	7	Chain A, Crystal Structure Of C-Terminal Autoproteolytic Domain Of Nucleoporin Nup98_x0001_gi|23200269|pdb|1KO6|C Chain C, Crystal Structure Of C-Terminal Autoproteolytic Domain Of Nucleoporin Nup98
gi|149533993	190102	98.9	2.87	5	PREDICTED: similar to nucleoporin 98kD, partial [Ornithorhynchus anatinus]
gi|51258091	136360	98.7	3.72	6	Nup98 protein [Mus musculus]
gi|151554045	26087.2	98.6	12.31	7	NUP98 protein [Bos taurus]
gi|74224737	37499.6	98.6	8.56	7	unnamed protein product [Mus musculus]
gi|9796392	57681.3	98.6	5.62	7	NUP98-HOXD13 fusion protein [Homo sapiens]
gi|67969195	60224.4	98.6	5.54	7	unnamed protein product [Macaca fascicularis]
gi|117957303	81649.9	98.6	4.02	7	NUP98/PHF23 fusion protein [Homo sapiens]
gi|118085325	189017	98.2	2.07	4	PREDICTED: similar to nucleoporin 98kD [Gallus gallus]
gi|28950406	37164.5	97.9	10.91	4	hypothetical protein [Homo sapiens]
gi|149459254	32750.5	97.5	6.36	4	PREDICTED: similar to NUP98/PHF23 fusion protein, partial [Ornithorhynchus anatinus]
gi|11991764	3.01915e+06	83.4	10.2	4	nucleoporin 98 [Mus musculus]
gi|50415052	65220.8	81.7	3.25	4	Nup98 protein [Xenopus laevis]
gi|2189957	17071.5	51.3	5.16	1	DDX10-NUP98 fusion protein type 1 [Homo sapiens]
gi|2189945	17725.9	51.3	4.76	1	NUP98-DDX10 fusion protein type 2 [Homo sapiens]
gi|50659095	87344.5	99.1	16.09	13	DEAD (Asp-Glu-Ala-Asp) box polypeptide 21 [Homo sapiens]_x0001_gi|76803555|sp|Q9NR30.5|DDX21_HUMAN RecName: Full=Nucleolar RNA helicase 2; AltName: Full=Nucleolar RNA helicase II; AltName: Full=Nucleolar RNA helicase Gu; AltName: F
gi|114630811	87245.3	99.1	16.09	13	PREDICTED: DEAD (Asp-Glu-Ala-Asp) box polypeptide 21 [Pan troglodytes]
gi|1230564	89250.8	99.1	15.73	13	Gu protein [Homo sapiens]
gi|51476855	79656.9	99.1	16.08	12	hypothetical protein [Homo sapiens]_x0001_gi|119574692|gb|EAW54307.1| DEAD (Asp-Glu-Ala-Asp) box polypeptide 21, isoform CRA_c [Homo sapiens]_x0001_gi|123993911|gb|ABM84557.1| DEAD (Asp-Glu-Ala-Asp) box polypeptide 21 [synthetic construct
gi|11890755	79688.9	99.1	16.08	12	RNA helicase II/Gu protein [Homo sapiens]
gi|109089501	77333.8	99	16.64	11	PREDICTED: similar to DEAD (Asp-Glu-Ala-Asp) box polypeptide 21 isoform 1 [Macaca mulatta]
gi|109089497	82981.8	99	15.57	11	PREDICTED: similar to DEAD (Asp-Glu-Ala-Asp) box polypeptide 21 isoform 2 [Macaca mulatta]
gi|109089499	87085.2	99	14.81	11	PREDICTED: similar to DEAD (Asp-Glu-Ala-Asp) box polypeptide 21 isoform 3 [Macaca mulatta]
gi|194205947	87162.2	99	9.55	8	PREDICTED: similar to DEAD (Asp-Glu-Ala-Asp) box polypeptide 21 [Equus caballus]
gi|73953311	87507.9	99	9.57	8	PREDICTED: similar to Nucleolar RNA helicase II (Nucleolar RNA helicase Gu) (RH II/Gu) (DEAD-box protein 21) [Canis familiaris]
gi|194042304	87194.5	99	9.57	8	PREDICTED: similar to DEAD (Asp-Glu-Ala-Asp) box polypeptide 21 [Sus scrofa]
gi|134085663	87230.5	98.9	8.29	7	DEAD (Asp-Glu-Ala-Asp) box polypeptide 21 [Bos taurus]_x0001_gi|133778115|gb|AAI23649.1| DDX21 protein [Bos taurus]
gi|90076020	39382.2	98.8	18.7	6	unnamed protein product [Macaca fascicularis]
gi|187931511	63955.3	60.9	1.76	2	DEAD-box subfamily ATP-dependent helicase [Francisella tularensis subsp. mediasiatica FSC147]_x0001_gi|187712420|gb|ACD30717.1| DEAD-box subfamily ATP-dependent helicase [Francisella tularensis subsp. mediasiatica FSC147]
gi|21104422	16395.4	40.3	6.21	1	DEAD/H(Asp-Glu-Ala-Asp/His)box polypeptide 21 [Homo sapiens]
gi|74208051	73392.8	99	12.96	8	unnamed protein product [Mus musculus]
gi|119613223	73265.1	99	12.92	8	DEAH (Asp-Glu-Ala-His) box polypeptide 15, isoform CRA_d [Homo sapiens]
gi|73951631	74207.2	99	12.82	8	PREDICTED: similar to Putative pre-mRNA splicing factor RNA helicase (DEAH box protein 15) isoform 3 [Canis familiaris]
gi|110835726	79971.3	99	11.95	8	DEAH (Asp-Glu-Ala-His) box polypeptide 15 isoform 1 [Mus musculus]_x0001_gi|71682476|gb|AAI00344.1| DEAH (Asp-Glu-Ala-His) box polypeptide 15 [Mus musculus]_x0001_gi|148705704|gb|EDL37651.1| DEAH (Asp-Glu-Ala-His) box polypeptide 15,
gi|73951651	80639.1	99	11.85	8	PREDICTED: similar to Putative pre-mRNA splicing factor RNA helicase (DEAH box protein 15) isoform 12 [Canis familiaris]
gi|119613226	80537	99	11.85	8	DEAH (Asp-Glu-Ala-His) box polypeptide 15, isoform CRA_g [Homo sapiens]
gi|73951637	85734.7	99	11.21	8	PREDICTED: similar to Putative pre-mRNA splicing factor RNA helicase (DEAH box protein 15) isoform 5 [Canis familiaris]
gi|109073867	86005.6	99	11.14	8	PREDICTED: DEAH (Asp-Glu-Ala-His) box polypeptide 15 isoform 1 [Macaca mulatta]
gi|114593354	86035.6	99	11.14	8	PREDICTED: similar to Putative pre-mRNA-splicing factor ATP-dependent RNA helicase DHX15 (DEAH box protein 15) isoform 1 [Pan troglodytes]
gi|2407195	1.0865e+06	99	11.08	8	putative RNA helicase and RNA dependent ATPase [Mus musculus]
gi|73951639	87217.7	99	11.01	8	PREDICTED: similar to Putative pre-mRNA splicing factor RNA helicase (DEAH box protein 15) isoform 6 [Canis familiaris]
gi|73951649	87427.9	99	10.98	8	PREDICTED: similar to Putative pre-mRNA splicing factor RNA helicase (DEAH box protein 15) isoform 11 [Canis familiaris]
gi|109073859	88756.4	99	10.8	8	PREDICTED: DEAH (Asp-Glu-Ala-His) box polypeptide 15 isoform 2 [Macaca mulatta]
gi|119613227	88744.3	99	10.8	8	DEAH (Asp-Glu-Ala-His) box polypeptide 15, isoform CRA_h [Homo sapiens]
gi|194382736	89547.5	99	10.71	8	unnamed protein product [Homo sapiens]
gi|73951665	90466.3	99	10.65	8	PREDICTED: similar to Putative pre-mRNA splicing factor RNA helicase (DEAH box protein 15) isoform 18 [Canis familiaris]
gi|109073865	90334.2	99	10.65	8	PREDICTED: DEAH (Asp-Glu-Ala-His) box polypeptide 15 isoform 4 [Macaca mulatta]
gi|110835723	91006.9	99	10.57	8	DEAH (Asp-Glu-Ala-His) box polypeptide 15 isoform 2 [Mus musculus]_x0001_gi|31563436|sp|O35286.2|DHX15_MOUSE RecName: Full=Putative pre-mRNA-splicing factor ATP-dependent RNA helicase DHX15; AltName: Full=DEAH box protein 15_x0001_gi|74
gi|68509926	90932.8	99	10.57	8	DEAH (Asp-Glu-Ala-His) box polypeptide 15 [Homo sapiens]_x0001_gi|114593352|ref|XP_001164599.1| PREDICTED: similar to Putative pre-mRNA-splicing factor ATP-dependent RNA helicase DHX15 (DEAH box protein 15) isoform 2 [Pan troglodyt
gi|197101615	90902.8	99	10.57	8	DEAH (Asp-Glu-Ala-His) box polypeptide 15 [Pongo abelii]_x0001_gi|55728653|emb|CAH91066.1| hypothetical protein [Pongo abelii]
gi|74139632	91023	99	10.57	8	unnamed protein product [Mus musculus]_x0001_gi|74223034|dbj|BAE40659.1| unnamed protein product [Mus musculus]
gi|73951633	91034.9	99	10.57	8	PREDICTED: similar to Putative pre-mRNA splicing factor RNA helicase (DEAH box protein 15) isoform 2 [Canis familiaris]
gi|147900580	90932.8	99	10.57	8	DEAH (Asp-Glu-Ala-His) box polypeptide 15 [Bos taurus]_x0001_gi|146186531|gb|AAI40521.1| DHX15 protein [Bos taurus]
gi|34878065	90976.9	99	10.57	8	PREDICTED: similar to Putative pre-mRNA-splicing factor ATP-dependent RNA helicase DHX15 (DEAH box protein 15) [Rattus norvegicus]_x0001_gi|109500663|ref|XP_001054651.1| PREDICTED: similar to Putative pre-mRNA-splicing factor ATP-d
gi|148887367	90902.8	99	10.57	8	RecName: Full=Putative pre-mRNA-splicing factor ATP-dependent RNA helicase DHX15; AltName: Full=DEAH box protein 15_x0001_gi|56403878|emb|CAI29724.1| hypothetical protein [Pongo abelii]
gi|109073861	90902.8	99	10.57	8	PREDICTED: DEAH (Asp-Glu-Ala-His) box polypeptide 15 isoform 5 [Macaca mulatta]
gi|126331856	91006.9	99	10.57	8	PREDICTED: similar to Putative pre-mRNA-splicing factor ATP-dependent RNA helicase DHX15 (DEAH box protein 15) [Monodelphis domestica]
gi|194209258	90961.9	99	10.57	8	PREDICTED: similar to Putative pre-mRNA-splicing factor ATP-dependent RNA helicase DHX15 (DEAH box protein 15) (ATP-dependent RNA helicase #46) [Equus caballus]
gi|109073863	91199.1	99	10.53	8	PREDICTED: DEAH (Asp-Glu-Ala-His) box polypeptide 15 isoform 3 [Macaca mulatta]
gi|73951661	91505.4	99	10.51	8	PREDICTED: similar to Putative pre-mRNA splicing factor RNA helicase (DEAH box protein 15) isoform 16 [Canis familiaris]
gi|73951663	91623.7	99	10.5	8	PREDICTED: similar to Putative pre-mRNA splicing factor RNA helicase (DEAH box protein 15) isoform 17 [Canis familiaris]
gi|73951653	91623.7	99	10.5	8	PREDICTED: similar to Putative pre-mRNA splicing factor RNA helicase (DEAH box protein 15) isoform 13 [Canis familiaris]
gi|2696613	92828.9	99	10.33	8	ATP-dependent RNA helicase #46 [Homo sapiens]
gi|73951659	93707	99	10.28	8	PREDICTED: similar to Putative pre-mRNA splicing factor RNA helicase (DEAH box protein 15) isoform 1 [Canis familiaris]
gi|149412309	94013.1	99	10.24	8	PREDICTED: hypothetical protein [Ornithorhynchus anatinus]
gi|73951647	99059.4	99	9.71	8	PREDICTED: similar to Putative pre-mRNA splicing factor RNA helicase (DEAH box protein 15) isoform 10 [Canis familiaris]
gi|73951657	90979.8	99	9.3	7	PREDICTED: similar to Putative pre-mRNA splicing factor RNA helicase (DEAH box protein 15) isoform 15 [Canis familiaris]
gi|73951635	56681.8	98.9	14.83	7	PREDICTED: similar to Putative pre-mRNA splicing factor RNA helicase (DEAH box protein 15) isoform 4 [Canis familiaris]
gi|119613224	56579.7	98.9	14.83	7	DEAH (Asp-Glu-Ala-His) box polypeptide 15, isoform CRA_e [Homo sapiens]
gi|71896565	87713.6	98.9	9.45	7	DEAH (Asp-Glu-Ala-His) box polypeptide 15 [Gallus gallus]_x0001_gi|60099089|emb|CAH65375.1| hypothetical protein [Gallus gallus]
gi|169646263	88390.9	98.9	9.36	7	DEAH (Asp-Glu-Ala-His) box polypeptide 15 [Danio rerio]
gi|73951655	83880.7	98.9	8.76	6	PREDICTED: similar to Putative pre-mRNA splicing factor RNA helicase (DEAH box protein 15) isoform 14 [Canis familiaris]
gi|47218463	86125.4	98.9	7.93	6	unnamed protein product [Tetraodon nigroviridis]
gi|147905854	87234.9	98.6	6.7	5	hypothetical protein LOC414571 [Xenopus laevis]_x0001_gi|46249858|gb|AAH68766.1| MGC81281 protein [Xenopus laevis]
gi|213982799	87256	98.6	6.7	5	hypothetical protein LOC100216120 [Xenopus (Silurana) tropicalis]_x0001_gi|195539831|gb|AAI68075.1| Unknown (protein for MGC:185897) [Xenopus tropicalis]
gi|119613222	59951	98.3	8.22	4	DEAH (Asp-Glu-Ala-His) box polypeptide 15, isoform CRA_c [Homo sapiens]
gi|1362900	18631.4	97.8	20.61	3	probable RNA helicase 2 - human (fragment)
gi|90084978	30480.4	97.4	11.81	3	unnamed protein product [Macaca fascicularis]
gi|149047226	31940.1	96.2	10.68	3	DEAH (Asp-Glu-Ala-His) box polypeptide 15 (predicted), isoform CRA_a [Rattus norvegicus]
gi|91077430	81621.9	83.5	2.93	2	PREDICTED: similar to ATP-dependent RNA helicase [Tribolium castaneum]_x0001_gi|270001627|gb|EEZ98074.1| hypothetical protein TcasGA2_TC000481 [Tribolium castaneum]
gi|193647974	81539.8	83.5	2.93	2	PREDICTED: similar to ATP-dependent RNA helicase [Acyrthosiphon pisum]
gi|242010317	82401.6	83.5	2.9	2	ATP-dependent RNA helicase, putative [Pediculus humanus corporis]_x0001_gi|212509891|gb|EEB13177.1| ATP-dependent RNA helicase, putative [Pediculus humanus corporis]
gi|118120881	16150.1	77.5	15.44	2	PREDICTED: hypothetical protein, partial [Gallus gallus]
gi|195149303	83104.4	60.5	1.49	1	GL11162 [Drosophila persimilis]_x0001_gi|194109444|gb|EDW31487.1| GL11162 [Drosophila persimilis]
gi|125806961	83278.5	60.5	1.49	1	GA10763 [Drosophila pseudoobscura pseudoobscura]_x0001_gi|54635381|gb|EAL24784.1| GA10763 [Drosophila pseudoobscura pseudoobscura]
gi|110771901	23871.3	59.7	4.74	1	PREDICTED: similar to CG11107-PA, partial [Apis mellifera]
gi|268571709	84297.7	59.7	1.35	1	Hypothetical protein CBG08977 [Caenorhabditis briggsae]_x0001_gi|187032219|emb|CAP28798.1| Hypothetical protein CBG08977 [Caenorhabditis briggsae]
gi|149053756	180931	99	4.88	8	clathrin, heavy polypeptide (Hc), isoform CRA_a [Rattus norvegicus]
gi|73966639	185984	99	4.73	8	PREDICTED: similar to Clathrin heavy chain 1 (CLH-17) isoform 6 [Canis familiaris]
gi|73966633	186761	99	4.73	8	PREDICTED: similar to Clathrin heavy chain 1 (CLH-17) isoform 3 [Canis familiaris]
gi|109114539	186744	99	4.73	8	PREDICTED: clathrin heavy chain 1 isoform 2 [Macaca mulatta]
gi|114669637	186715	99	4.73	8	PREDICTED: clathrin heavy chain 1 isoform 9 [Pan troglodytes]
gi|56554530	186932	99	4.72	8	Chain A, Clathrin D6 Coat_x0001_gi|56554531|pdb|1XI4|B Chain B, Clathrin D6 Coat_x0001_gi|56554532|pdb|1XI4|C Chain C, Clathrin D6 Coat_x0001_gi|56554536|pdb|1XI4|D Chain D, Clathrin D6 Coat_x0001_gi|56554537|pdb|1XI4|E Chain E, Clathrin D6 Coat_x0001_gi|565545
gi|114669641	186914	99	4.72	8	PREDICTED: clathrin heavy chain 1 isoform 3 [Pan troglodytes]
gi|109114537	187889	99	4.7	8	PREDICTED: clathrin heavy chain 1 isoform 3 [Macaca mulatta]_x0001_gi|114669639|ref|XP_001135550.1| PREDICTED: clathrin heavy chain 1 isoform 4 [Pan troglodytes]_x0001_gi|30353925|gb|AAH51800.1| CLTC protein [Homo sapiens]_x0001_gi|1196148
gi|109114533	188673	99	4.68	8	PREDICTED: clathrin heavy chain 1 isoform 1 [Macaca mulatta]_x0001_gi|114669633|ref|XP_001135369.1| PREDICTED: clathrin heavy chain 1 isoform 2 [Pan troglodytes]
gi|73966647	188784	99	4.67	8	PREDICTED: similar to Clathrin heavy chain 1 (CLH-17) isoform 10 [Canis familiaris]
gi|73966635	189536	99	4.66	8	PREDICTED: similar to Clathrin heavy chain 1 (CLH-17) isoform 4 [Canis familiaris]
gi|126307434	190575	99	4.62	8	PREDICTED: similar to Clathrin heavy chain 1 (CLH-17) [Monodelphis domestica]
gi|224076607	191025	99	4.61	8	PREDICTED: clathrin heavy chain 1 [Taeniopygia guttata]
gi|4758012	191613	99	4.6	8	clathrin heavy chain 1 [Homo sapiens]_x0001_gi|225735709|ref|NP_001139599.1| clathrin, heavy chain (Hc) [Sus scrofa]_x0001_gi|109114531|ref|XP_001108798.1| PREDICTED: clathrin heavy chain 1 isoform 7 [Macaca mulatta]_x0001_gi|114669631|ref|XP_0
gi|51491845	191555	99	4.6	8	clathrin, heavy polypeptide (Hc) [Mus musculus]_x0001_gi|66773801|sp|Q68FD5.3|CLH_MOUSE RecName: Full=Clathrin heavy chain 1_x0001_gi|51259242|gb|AAH79897.1| Clathrin, heavy polypeptide (Hc) [Mus musculus]_x0001_gi|56205530|emb|CAI25362.1|
gi|27806689	191587	99	4.6	8	clathrin heavy chain 1 [Bos taurus]_x0001_gi|1705915|sp|P49951.1|CLH1_BOVIN RecName: Full=Clathrin heavy chain 1_x0001_gi|969024|gb|AAC48524.1| clathrin heavy chain [Bos taurus]
gi|9506497	191597	99	4.6	8	clathrin, heavy chain (Hc) [Rattus norvegicus]_x0001_gi|116514|sp|P11442.3|CLH_RAT RecName: Full=Clathrin heavy chain 1_x0001_gi|203302|gb|AAA40874.1| clathrin heavy chain [Rattus norvegicus]
gi|34364629	191523	99	4.6	8	hypothetical protein [Homo sapiens]
gi|73966629	191629	99	4.6	8	PREDICTED: similar to Clathrin heavy chain 1 (CLH-17) isoform 1 [Canis familiaris]
gi|124339781	191609	99	4.6	8	clathrin heavy chain 1 [Gallus gallus]
gi|149635560	191575	99	4.6	8	PREDICTED: similar to Clathrin heavy chain 1 (CLH-17) [Ornithorhynchus anatinus]
gi|73966643	191744	99	4.59	8	PREDICTED: similar to Clathrin heavy chain 1 (CLH-17) isoform 8 [Canis familiaris]
gi|114669627	191728	99	4.59	8	PREDICTED: clathrin heavy chain 1 isoform 7 [Pan troglodytes]
gi|56205529	191985	99	4.59	8	clathrin, heavy polypeptide (Hc) [Mus musculus]
gi|73966649	191935	99	4.59	8	PREDICTED: similar to Clathrin heavy chain 1 (CLH-17) isoform 11 [Canis familiaris]
gi|119614803	192057	99	4.59	8	clathrin, heavy polypeptide (Hc), isoform CRA_c [Homo sapiens]
gi|73966645	192413	99	4.58	8	PREDICTED: similar to Clathrin heavy chain 1 (CLH-17) isoform 9 [Canis familiaris]
gi|109114529	192397	99	4.58	8	PREDICTED: clathrin heavy chain 1 isoform 6 [Macaca mulatta]_x0001_gi|114669629|ref|XP_001135882.1| PREDICTED: clathrin heavy chain 1 isoform 6 [Pan troglodytes]_x0001_gi|119614801|gb|EAW94395.1| clathrin, heavy polypeptide (Hc), iso
gi|33438248	192476	99	4.57	8	mKIAA0034 protein [Mus musculus]
gi|40788952	192685	99	4.57	8	KIAA0034 [Homo sapiens]
gi|73966641	193056	99	4.56	8	PREDICTED: similar to Clathrin heavy chain 1 (CLH-17) isoform 7 [Canis familiaris]
gi|189528657	191635	98.9	3.88	7	PREDICTED: hypothetical protein LOC503600 [Danio rerio]
gi|58332344	191607	98.9	4.12	7	hypothetical protein LOC496448 [Xenopus (Silurana) tropicalis]_x0001_gi|54035250|gb|AAH84145.1| hypothetical LOC496448 [Xenopus (Silurana) tropicalis]
gi|148231021	191429	98.9	4.12	7	MGC80936 protein [Xenopus laevis]_x0001_gi|49115532|gb|AAH73439.1| MGC80936 protein [Xenopus laevis]
gi|148683851	152362	98.9	5.14	7	clathrin, heavy polypeptide (Hc), isoform CRA_a [Mus musculus]
gi|149053757	152592	98.9	5.13	7	clathrin, heavy polypeptide (Hc), isoform CRA_b [Rattus norvegicus]
gi|109114541	180740	98.9	4.31	7	PREDICTED: clathrin heavy chain 1 isoform 4 [Macaca mulatta]
gi|114669643	169743	98.9	4.58	7	PREDICTED: clathrin heavy chain 1 isoform 1 [Pan troglodytes]
gi|73966637	184827	98.9	4.2	7	PREDICTED: similar to Clathrin heavy chain 1 (CLH-17) isoform 5 [Canis familiaris]
gi|109114535	184811	98.9	4.2	7	PREDICTED: clathrin heavy chain 1 isoform 5 [Macaca mulatta]_x0001_gi|114669635|ref|XP_001135801.1| PREDICTED: clathrin heavy chain 1 isoform 5 [Pan troglodytes]
gi|49619021	191931	98.8	2.74	5	clatherin heavy chain [Danio rerio]
gi|226823301	191818	98.8	2.74	5	clathrin, heavy polypeptide a [Danio rerio]
gi|74137988	114244	98.7	4.58	5	unnamed protein product [Mus musculus]
gi|18250637	191598	98.7	3.22	6	clathrin heavy-chain [Gallus gallus]
gi|47215800	214355	98.4	2.41	5	unnamed protein product [Tetraodon nigroviridis]
gi|190337430	191803	98.4	2.2	4	Clathrin, heavy polypeptide a (Hc) [Danio rerio]
gi|260799702	174495	98.4	2.41	4	hypothetical protein BRAFLDRAFT_124425 [Branchiostoma floridae]_x0001_gi|229280063|gb|EEN50837.1| hypothetical protein BRAFLDRAFT_124425 [Branchiostoma floridae]
gi|224172269	80024.7	98.2	4.35	3	PREDICTED: clathrin heavy chain 1, partial [Taeniopygia guttata]
gi|74153032	56232.9	95.4	6.34	3	unnamed protein product [Mus musculus]
gi|74142656	58164.2	95.4	6.14	3	unnamed protein product [Mus musculus]
gi|195394067	163313	93.7	1.89	3	GJ19488 [Drosophila virilis]_x0001_gi|194150177|gb|EDW65868.1| GJ19488 [Drosophila virilis]
gi|1408234	178615	93.6	1.72	3	clathrin heavy chain 2 [Homo sapiens]
gi|242247001	180295	93.6	1.71	3	clathrin, heavy polypeptide-like 1 isoform 2 [Homo sapiens]_x0001_gi|119623452|gb|EAX03047.1| clathrin, heavy polypeptide-like 1, isoform CRA_b [Homo sapiens]_x0001_gi|221044108|dbj|BAH13731.1| unnamed protein product [Homo sapiens]
gi|198462123	180395	93.6	1.7	3	GA21476 [Drosophila pseudoobscura pseudoobscura]_x0001_gi|198142753|gb|EAL29357.2| GA21476 [Drosophila pseudoobscura pseudoobscura]
gi|241610894	184653	93.6	1.67	3	clathrin heavy chain, putative [Ixodes scapularis]_x0001_gi|215500786|gb|EEC10280.1| clathrin heavy chain, putative [Ixodes scapularis]
gi|1408232	185348	93.6	1.66	3	clathrin heavy chain 2 [Homo sapiens]
gi|110765224	186074	93.6	1.66	3	PREDICTED: similar to Clathrin heavy chain CG9012-PA, isoform A isoform 1 [Apis mellifera]
gi|242246985	187029	93.6	1.65	3	clathrin, heavy polypeptide-like 1 isoform 1 [Homo sapiens]_x0001_gi|2506298|sp|P53675.2|CLH2_HUMAN RecName: Full=Clathrin heavy chain 2; AltName: Full=CLH-22_x0001_gi|119623451|gb|EAX03046.1| clathrin, heavy polypeptide-like 1, isoform
gi|1335854	187108	93.6	1.65	3	muscle clathrin heavy chain [Homo sapiens]
gi|1359719	187002	93.6	1.65	3	clathrin heavy chain polypeptide [Homo sapiens]_x0001_gi|187252523|gb|AAI66681.1| Clathrin, heavy chain-like 1 [synthetic construct]
gi|114685177	186929	93.6	1.65	3	PREDICTED: clathrin, heavy polypeptide-like 1 [Pan troglodytes]
gi|170058459	189995	93.6	1.62	3	clathrin heavy chain [Culex quinquefasciatus]_x0001_gi|167877562|gb|EDS40945.1| clathrin heavy chain [Culex quinquefasciatus]
gi|118098353	191016	93.6	1.61	3	PREDICTED: similar to Clathrin, heavy polypeptide (Hc) [Gallus gallus]
gi|224071898	191135	93.6	1.61	3	PREDICTED: clathrin heavy chain 1 [Taeniopygia guttata]
gi|73995973	190008	93.6	1.61	3	PREDICTED: similar to Clathrin heavy chain 2 (CLH-22) [Canis familiaris]
gi|118781781	191439	93.6	1.61	3	AGAP003021-PA [Anopheles gambiae str. PEST]_x0001_gi|116129254|gb|EAA08110.4| AGAP003021-PA [Anopheles gambiae str. PEST]
gi|157136689	191512	93.6	1.61	3	clathrin heavy chain [Aedes aegypti]_x0001_gi|157136691|ref|XP_001656877.1| clathrin heavy chain [Aedes aegypti]_x0001_gi|157136693|ref|XP_001656878.1| clathrin heavy chain [Aedes aegypti]_x0001_gi|108869884|gb|EAT34109.1| clathrin heavy c
gi|156394133	191231	93.6	1.61	3	predicted protein [Nematostella vectensis]_x0001_gi|156223786|gb|EDO44618.1| predicted protein [Nematostella vectensis]
gi|17137000	191176	93.6	1.61	3	clathrin heavy chain, isoform A [Drosophila melanogaster]_x0001_gi|24642310|ref|NP_727901.1| clathrin heavy chain, isoform B [Drosophila melanogaster]_x0001_gi|45555323|ref|NP_996451.1| clathrin heavy chain, isoform D [Drosophila melanog
gi|194894176	191190	93.6	1.61	3	GG19369 [Drosophila erecta]_x0001_gi|190649673|gb|EDV46951.1| GG19369 [Drosophila erecta]
gi|195355441	191133	93.6	1.61	3	GM22522 [Drosophila sechellia]_x0001_gi|194129489|gb|EDW51532.1| GM22522 [Drosophila sechellia]
gi|195479007	191204	93.6	1.61	3	GE16016 [Drosophila yakuba]_x0001_gi|194188255|gb|EDX01839.1| GE16016 [Drosophila yakuba]
gi|194767743	191275	93.6	1.61	3	GF11191 [Drosophila ananassae]_x0001_gi|190619817|gb|EDV35341.1| GF11191 [Drosophila ananassae]
gi|156544986	192197	93.6	1.61	3	PREDICTED: similar to clathrin heavy chain [Nasonia vitripennis]
gi|195131543	191443	93.6	1.61	3	GI14823 [Drosophila mojavensis]_x0001_gi|193908660|gb|EDW07527.1| GI14823 [Drosophila mojavensis]
gi|195175488	191395	93.6	1.61	3	GL11922 [Drosophila persimilis]_x0001_gi|194103641|gb|EDW25684.1| GL11922 [Drosophila persimilis]
gi|195048183	191327	93.6	1.61	3	GH24776 [Drosophila grimshawi]_x0001_gi|193893325|gb|EDV92191.1| GH24776 [Drosophila grimshawi]
gi|195447348	9190263	93.6	1.61	3	GK25278 [Drosophila willistoni]_x0001_gi|194167259|gb|EDW82160.1| GK25278 [Drosophila willistoni]
gi|219362829	191990	93.6	1.61	3	clathrin heavy chain [Bombyx mori]_x0001_gi|218563475|dbj|BAH03459.1| clathrin [Bombyx mori]
gi|91085095	192310	93.6	1.6	3	PREDICTED: similar to AGAP003021-PA [Tribolium castaneum]_x0001_gi|270008499|gb|EFA04947.1| hypothetical protein TcasGA2_TC015014 [Tribolium castaneum]
gi|221130531	192024	93.6	1.6	3	PREDICTED: similar to predicted protein [Hydra magnipapillata]
gi|126324876	197304	93.6	1.55	3	PREDICTED: similar to clathrin heavy chain 1 [Monodelphis domestica]
gi|47226683	206514	93.6	1.49	3	unnamed protein product [Tetraodon nigroviridis]
gi|196014982	192782	93.4	1.78	4	hypothetical protein TRIADDRAFT_51044 [Trichoplax adhaerens]_x0001_gi|190580102|gb|EDV20188.1| hypothetical protein TRIADDRAFT_51044 [Trichoplax adhaerens]
gi|90076140	54241.1	82.5	4.08	2	unnamed protein product [Macaca fascicularis]
gi|21619519	58556	82.5	3.77	2	Cltc protein [Mus musculus]
gi|47193239	26555.2	60.9	4.74	1	unnamed protein product [Tetraodon nigroviridis]
gi|262304429	35087	59	3.24	1	clathrin heavy chain [Dinothrombium pandorae]
gi|56205528	24918.2	58.5	4.19	1	clathrin, heavy polypeptide (Hc) [Mus musculus]
gi|18447878	20155.3	57.4	5	1	clathrin heavy-chain [Gallus gallus]
gi|18447884	14433.5	53.2	6.35	1	clathrin heavy-chain [Gallus gallus]
gi|73960771	59524.7	98.9	12.64	6	PREDICTED: similar to heterogeneous nuclear ribonucleoprotein U isoform b isoform 5 [Canis familiaris]
gi|73960765	78006.1	98.9	9.67	6	PREDICTED: similar to heterogeneous nuclear ribonucleoprotein U isoform b isoform 2 [Canis familiaris]_x0001_gi|73960769|ref|XP_863356.1| PREDICTED: similar to heterogeneous nuclear ribonucleoprotein U isoform b isoform 4 [Canis fa
gi|39645240	78382.4	98.9	9.65	6	HNRPU protein [Homo sapiens]
gi|16041796	79715.9	98.9	9.42	6	HNRPU protein [Homo sapiens]_x0001_gi|190689399|gb|ACE86474.1| heterogeneous nuclear ribonucleoprotein U (scaffold attachment factor A) protein [synthetic construct]_x0001_gi|190690761|gb|ACE87155.1| heterogeneous nuclear ribonucleoprotein
gi|73960773	79610.9	98.9	9.42	6	PREDICTED: similar to heterogeneous nuclear ribonucleoprotein U isoform b isoform 1 [Canis familiaris]
gi|55859528	79844.1	98.9	9.41	6	heterogeneous nuclear ribonucleoprotein U (scaffold attachment factor A) [Homo sapiens]
gi|193785231	83085.2	98.9	9.07	6	unnamed protein product [Homo sapiens]
gi|194386122	86860.8	98.9	8.67	6	unnamed protein product [Homo sapiens]
gi|148681230	86805.7	98.9	8.58	6	heterogeneous nuclear ribonucleoprotein U, isoform CRA_b [Mus musculus]
gi|624918	87748.7	98.9	8.52	6	SP120 [Rattus norvegicus]
gi|148747541	87732.7	98.9	8.52	6	heterogeneous nuclear ribonucleoprotein U [Rattus norvegicus]_x0001_gi|47938967|gb|AAH72529.1| Heterogeneous nuclear ribonucleoprotein U [Rattus norvegicus]_x0001_gi|149040844|gb|EDL94801.1| rCG20317, isoform CRA_b [Rattus norvegicus]
gi|160333923	87917.9	98.9	8.5	6	heterogeneous nuclear ribonucleoprotein U [Mus musculus]_x0001_gi|81879424|sp|Q8VEK3.1|HNRPU_MOUSE RecName: Full=Heterogeneous nuclear ribonucleoprotein U; Short=hnRNP U; AltName: Full=Scaffold attachment factor A; Short=SAF-A_x0001_gi|
gi|74186692	88017	98.9	8.5	6	unnamed protein product [Mus musculus]
gi|74211462	87845.8	98.9	8.5	6	unnamed protein product [Mus musculus]
gi|74213391	87945.9	98.9	8.5	6	unnamed protein product [Mus musculus]
gi|26354194	87977.9	98.9	8.5	6	unnamed protein product [Mus musculus]
gi|149040843	87932.1	98.9	8.47	6	rCG20317, isoform CRA_a [Rattus norvegicus]
gi|32358	88945.8	98.9	8.44	6	hnRNP U protein [Homo sapiens]
gi|14141161	88979.8	98.9	8.44	6	heterogeneous nuclear ribonucleoprotein U isoform b [Homo sapiens]_x0001_gi|13097201|gb|AAH03367.1| Heterogeneous nuclear ribonucleoprotein U (scaffold attachment factor A) [Homo sapiens]_x0001_gi|13177673|gb|AAH03621.1| Heterogeneous nu
gi|3202000	90479.5	98.9	8.25	6	scaffold attachment factor A [Homo sapiens]
gi|74136883	90584.6	98.9	8.24	6	heterogeneous nuclear ribonucleoprotein U isoform a [Homo sapiens]_x0001_gi|254763463|sp|Q00839.6|HNRPU_HUMAN RecName: Full=Heterogeneous nuclear ribonucleoprotein U; Short=hnRNP U; AltName: Full=Scaffold attachment factor A; Short
gi|74198105	87919.8	98.8	7.37	5	unnamed protein product [Mus musculus]
gi|109019977	88158.1	98.8	7.34	5	PREDICTED: similar to heterogeneous nuclear ribonucleoprotein U isoform a [Macaca mulatta]
gi|125991756	90452.5	98.8	7.15	5	heterogeneous nuclear ribonucleoprotein U [Bos taurus]_x0001_gi|124828988|gb|AAI33330.1| Heterogeneous nuclear ribonucleoprotein U (scaffold attachment factor A) [Bos taurus]
gi|74189661	57992.5	98.7	11.26	5	unnamed protein product [Mus musculus]
gi|114573565	67798.6	98.5	8.47	5	PREDICTED: heterogeneous nuclear ribonucleoprotein U [Pan troglodytes]
gi|74219852	1.07629e+06	98.5	7.43	5	unnamed protein product [Mus musculus]
gi|149641653	76869.4	98.5	7.42	5	PREDICTED: similar to Heterogeneous nuclear ribonucleoprotein U (hnRNP U) (Scaffold attachment factor A) (SAF-A) (p120) (pp120) [Ornithorhynchus anatinus]
gi|3329496	87891.8	98.5	6.39	5	heterogenous nuclear ribonucleoprotein U [Mus musculus]
gi|33187705	57663.3	98.4	8.19	4	unknown [Homo sapiens]_x0001_gi|119597532|gb|EAW77126.1| heterogeneous nuclear ribonucleoprotein U (scaffold attachment factor A), isoform CRA_a [Homo sapiens]
gi|22028256	58323.1	98.4	8.08	4	Similar to heterogeneous nuclear ribonucleoprotein U (scaffold attachment factor A) [Homo sapiens]
gi|55859526	61750	98.4	7.65	4	heterogeneous nuclear ribonucleoprotein U (scaffold attachment factor A) [Homo sapiens]
gi|119597533	62493.9	98.4	7.55	4	heterogeneous nuclear ribonucleoprotein U (scaffold attachment factor A), isoform CRA_b [Homo sapiens]
gi|118088143	77531.9	98.3	6.05	4	PREDICTED: similar to Heterogeneous nuclear ribonucleoprotein U (scaffold attachment factor A) [Gallus gallus]
gi|67968810	80280.4	98.3	5.78	4	unnamed protein product [Macaca fascicularis]
gi|224047617	80444.2	98.3	5.76	4	PREDICTED: heterogeneous nuclear ribonucleoprotein U (scaffold attachment factor A) [Taeniopygia guttata]
gi|194227244	57619.3	97.9	6.43	3	PREDICTED: similar to MGC142835 protein [Equus caballus]
gi|10801618	61764	97.9	6.01	3	hypothetical protein [Macaca fascicularis]
gi|115305387	61846.1	97.9	6	3	HNRNPU protein [Bos taurus]
gi|54311369	85538.8	93.3	3.37	3	Saf-A protein [Xenopus laevis]
gi|147904138	85871	93.3	3.36	3	scaffold attachment factor A [Xenopus laevis]_x0001_gi|4106370|gb|AAD02820.1| scaffold attachment factor A [Xenopus laevis]
gi|189441937	86732.1	93.3	3.32	3	Hnrnpu protein [Xenopus tropicalis]
gi|147903785	87454.9	93.3	3.29	3	heterogeneous nuclear ribonucleoprotein U (scaffold attachment factor A) [Xenopus (Silurana) tropicalis]_x0001_gi|89273407|emb|CAJ83323.1| heterogeneous nuclear ribonucleoprotein U (scaffold attachment factor A) [Xenopus tropic
gi|546484	1647.8	60.9	86.67	1	heterogeneous nuclear ribonucleoprotein U, MARs binding protein p120, hnRNP U=matrix attachment region binding protein [chickens, oviduct nuclei, Peptide Partial, 15 aa, segment 3 of 4]
gi|55859527	27404.8	57.9	7.44	2	heterogeneous nuclear ribonucleoprotein U (scaffold attachment factor A) [Homo sapiens]
gi|84993598	5710.47	52.9	16.33	1	scaffold attachment factor A [Gallus gallus]
gi|47132620	65432.9	98.8	8.76	5	keratin 2 [Homo sapiens]_x0001_gi|239938650|sp|P35908.2|K22E_HUMAN RecName: Full=Keratin, type II cytoskeletal 2 epidermal; AltName: Full=Cytokeratin-2e; Short=CK 2e; Short=K2e; Short=keratin-2_x0001_gi|64654451|gb|AAH96294.1| Keratin 2
gi|181402	65865.3	98.8	8.68	5	epidermal cytokeratin 2 [Homo sapiens]_x0001_gi|2565257|gb|AAB81946.1| keratin 2e [Homo sapiens]
gi|148727309	65984.4	98.8	8.68	5	keratin 2 [Pan troglodytes]_x0001_gi|146741526|dbj|BAF62419.1| keratin 2A [Pan troglodytes verus]
gi|109096839	65501.8	83.8	3.43	2	PREDICTED: similar to keratin 2a [Macaca mulatta]
gi|194687333	1.705	62.8	4.17	2	PREDICTED: similar to keratin 6A [Bos taurus]
gi|76617868	58895.9	62.8	3.64	2	PREDICTED: keratin 6C isoform 2 [Bos taurus]
gi|76689949	58926.9	62.8	3.64	2	PREDICTED: cytokeratin type II, component IV isoform 3 [Bos taurus]
gi|61870938	60856	62.8	3.5	2	PREDICTED: cytokeratin type II, component IV isoform 1 [Bos taurus]
gi|76617862	60825	62.8	3.5	2	PREDICTED: keratin 6C isoform 3 [Bos taurus]
gi|194037322	24145.3	60.9	5.14	1	PREDICTED: similar to keratin 5b, partial [Sus scrofa]
gi|109521103	38377.2	60.9	3.15	1	PREDICTED: similar to type II keratin Kb36 [Rattus norvegicus]
gi|194212032	43105.9	60.9	2.5	1	PREDICTED: similar to epithelial keratin 2e [Equus caballus]
gi|47059013	58911.5	60.9	2.04	1	keratin 73 [Mus musculus]_x0001_gi|81892069|sp|Q6NXH9.1|K2C73_MOUSE RecName: Full=Keratin, type II cytoskeletal 73; AltName: Full=Cytokeratin-73; Short=CK-73; AltName: Full=Keratin-73; Short=K73; AltName: Full=Type II keratin-36; A
gi|57012358	60387.1	60.9	1.99	1	keratin 73 [Rattus norvegicus]_x0001_gi|81891700|sp|Q6IG03.1|K2C73_RAT RecName: Full=Keratin, type II cytoskeletal 73; AltName: Full=Cytokeratin-73; Short=CK-73; AltName: Full=Keratin-73; Short=K73; AltName: Full=Type II keratin
gi|115528975	61301.7	60.9	1.93	1	Keratin 77 [Mus musculus]_x0001_gi|223461411|gb|AAI41260.1| Krt77 protein [Mus musculus]
gi|51092293	61358.8	60.9	1.92	1	keratin 77 [Mus musculus]_x0001_gi|66773987|sp|Q6IFZ6.1|K2C1B_MOUSE RecName: Full=Keratin, type II cytoskeletal 1b; AltName: Full=Cytokeratin-1B; Short=CK-1B; AltName: Full=Keratin-77; Short=K77; AltName: Full=Type II keratin Kb
gi|31074631	61801.3	60.9	1.9	1	keratin 1b [Homo sapiens]
gi|113414871	61802.3	60.9	1.9	1	Keratin 77 [Homo sapiens]
gi|119617049	61878.4	60.9	1.9	1	keratin 1B [Homo sapiens]
gi|194018511	61901.4	60.9	1.9	1	keratin 77 [Homo sapiens]
gi|114644550	62306.8	60.9	1.89	1	PREDICTED: keratin 1B isoform 2 [Pan troglodytes]
gi|149714785	63568.4	60.9	1.85	1	PREDICTED: similar to Keratin 77 isoform 1 [Equus caballus]
gi|194212034	63657.8	60.9	1.8	1	PREDICTED: similar to epithelial keratin 1 [Equus caballus]
gi|119892108	5063723	60.9	1.78	1	PREDICTED: similar to keratin 2 (epidermal ichthyosis bullosa of Siemens) [Bos taurus]
gi|81891716	64830.8	60.9	1.76	1	RecName: Full=Keratin, type II cytoskeletal 1; AltName: Full=Cytokeratin-1; Short=CK-1; AltName: Full=Keratin-1; Short=K1; AltName: Full=Type II keratin Kb1_x0001_gi|46485012|tpg|DAA02055.1| TPA_exp: type II keratin Kb1 [Rattus
gi|120474989	64756.7	60.9	1.76	1	keratin 1 [Rattus norvegicus]_x0001_gi|119850981|gb|AAI27465.1| Keratin 1 [Rattus norvegicus]
gi|194212028	64474.9	60.9	1.75	1	PREDICTED: similar to keratin 2 (epidermal ichthyosis bullosa of Siemens) [Equus caballus]
gi|50979264	1.06445e+06	60.9	1.74	1	keratin 2 [Canis lupus familiaris]_x0001_gi|75062694|sp|Q6EIZ1.1|K22E_CANFA RecName: Full=Keratin, type II cytoskeletal 2 epidermal; AltName: Full=Cytokeratin-2e; Short=CK 2e; Short=K2e; Short=keratin-2; AltName: Full=Epithelial
gi|109139700	11089.3	59.5	11.58	1	PREDICTED: similar to Keratin, type II cytoskeletal 6A (Cytokeratin-6A) (CK 6A) (K6a keratin), partial [Macaca mulatta]
gi|119617038	38577.1	59.5	3.06	1	keratin 5 (epidermolysis bullosa simplex, Dowling-Meara/Kobner/Weber-Cockayne types), isoform CRA_a [Homo sapiens]
gi|194037328	48067.9	59.5	2.97	2	PREDICTED: similar to keratin 6L [Sus scrofa]
gi|109096809	51570.8	59.5	2.37	1	PREDICTED: keratin 5 isoform 9 [Macaca mulatta]
gi|109096807	52677	59.5	2.3	1	PREDICTED: keratin 5 isoform 17 [Macaca mulatta]
gi|109096805	53931.5	59.5	2.24	1	PREDICTED: keratin 5 isoform 16 [Macaca mulatta]
gi|109096777	54413.3	59.5	2.2	1	PREDICTED: keratin 6B isoform 5 [Macaca mulatta]
gi|386850	54511.8	59.5	2.17	1	keratin K5 [Homo sapiens]
gi|109096853	56358.2	59.5	2.15	1	PREDICTED: similar to keratin 6L isoform 1 [Macaca mulatta]
gi|194377194	55799.3	59.5	2.12	1	unnamed protein product [Homo sapiens]
gi|194383916	55732.1	59.5	2.09	1	unnamed protein product [Homo sapiens]
gi|109096851	57568.3	59.5	2.08	1	PREDICTED: similar to keratin 6L isoform 2 [Macaca mulatta]
gi|22164776	57552.3	59.5	2.07	1	keratin 6L [Mus musculus]_x0001_gi|123797712|sp|Q8VED5.2|K2C79_MOUSE RecName: Full=Keratin, type II cytoskeletal 79; AltName: Full=Cytokeratin-79; Short=CK-79; AltName: Full=Keratin-79; Short=K79; AltName: Full=Type II keratin-38_x0001_g
gi|109096783	56358.9	59.5	2.07	1	PREDICTED: keratin 6A isoform 6 [Macaca mulatta]
gi|32567786	57835.7	59.5	2.06	1	keratin 6L [Homo sapiens]_x0001_gi|27764563|tpg|DAA00403.1| TPA_exp: keratin 6l [Homo sapiens]_x0001_gi|31074633|emb|CAD91893.1| keratin 6L [Homo sapiens]
gi|115496454	57720.6	59.5	2.06	1	keratin 6L [Bos taurus]_x0001_gi|122143589|sp|Q148H7.1|K2C79_BOVIN RecName: Full=Keratin, type II cytoskeletal 79; AltName: Full=Cytokeratin-79; Short=CK-79; AltName: Full=Keratin-79; Short=K79_x0001_gi|109939915|gb|AAI18315.1| Kerat
gi|39795269	57775.6	59.5	2.06	1	Keratin 79 [Homo sapiens]
gi|74748078	57809.6	59.5	2.06	1	RecName: Full=Keratin, type II cytoskeletal 79; AltName: Full=Cytokeratin-79; Short=CK-79; AltName: Full=Keratin-79; Short=K79; AltName: Full=Type II keratin-38; AltName: Full=Keratin-6-like; Short=Keratin-6L_x0001_gi|540352
gi|194387918	57838.6	59.5	2.06	1	unnamed protein product [Homo sapiens]
gi|109096793	58682.4	59.5	2.02	1	PREDICTED: keratin 5 isoform 12 [Macaca mulatta]
gi|194388850	58678.5	59.5	2.01	1	unnamed protein product [Homo sapiens]
gi|148672069	59267.3	59.5	2.01	1	cDNA sequence BC031593 [Mus musculus]
gi|14017762	57361.6	59.5	2	1	larva-specific keratin RLK [Rana catesbeiana]
gi|194387990	58536.3	59.5	2	1	unnamed protein product [Homo sapiens]
gi|3901030	59504.3	59.5	2	1	cytokeratin type II [Homo sapiens]
gi|7161776	59530.4	59.5	2	1	cytokeratin [Homo sapiens]
gi|109096841	59460.3	59.5	2	1	PREDICTED: similar to cytokeratin type II [Macaca mulatta]
gi|114644576	59563.5	59.5	2	1	PREDICTED: cytokeratin type II [Pan troglodytes]
gi|153791158	59560.4	59.5	2	1	keratin 75 [Homo sapiens]_x0001_gi|239938651|sp|O95678.2|K2C75_HUMAN RecName: Full=Keratin, type II cytoskeletal 75; AltName: Full=Cytokeratin-75; Short=CK-75; AltName: Full=Keratin-75; Short=K75; AltName: Full=Type II keratin-18;
gi|119617041	59433.5	59.5	1.99	1	keratin 5 (epidermolysis bullosa simplex, Dowling-Meara/Kobner/Weber-Cockayne types), isoform CRA_d [Homo sapiens]
gi|194384240	58850.5	59.5	1.98	1	unnamed protein product [Homo sapiens]
gi|109096799	59127.8	59.5	1.97	1	PREDICTED: keratin 5 isoform 10 [Macaca mulatta]
gi|73996326	59642.4	59.5	1.97	1	PREDICTED: similar to Keratin, type II cytoskeletal 6A (Cytokeratin 6A) (CK 6A) (K6a keratin) isoform 10 [Canis familiaris]
gi|73996354	59604.3	59.5	1.97	1	PREDICTED: similar to Keratin, type II cytoskeletal 6A (Cytokeratin 6A) (CK 6A) (K6a keratin) isoform 3 [Canis familiaris]
gi|109096803	59750.7	59.5	1.96	1	PREDICTED: keratin 5 isoform 19 [Macaca mulatta]
gi|386849	59953	59.5	1.95	1	keratin type II [Homo sapiens]
gi|119617036	59915.9	59.5	1.95	1	hCG2039812, isoform CRA_a [Homo sapiens]
gi|119617035	59895.9	59.5	1.95	1	keratin 6E, isoform CRA_b [Homo sapiens]
gi|119617032	59910.8	59.5	1.95	1	keratin 6B, isoform CRA_a [Homo sapiens]
gi|908801	60200.2	59.5	1.95	1	keratin type II [Homo sapiens]
gi|155969697	60025	59.5	1.95	1	keratin 6C [Homo sapiens]_x0001_gi|59803089|sp|P48668.3|K2C6C_HUMAN RecName: Full=Keratin, type II cytoskeletal 6C; AltName: Full=Cytokeratin-6C; Short=CK 6C; AltName: Full=K6c keratin; AltName: Full=Cytokeratin-6E; Short=CK 6E; A
gi|908790	59998.9	59.5	1.95	1	keratin type II [Homo sapiens]
gi|114644568	60018	59.5	1.95	1	PREDICTED: keratin 6A [Pan troglodytes]_x0001_gi|15559584|gb|AAH14152.1| Keratin 6A [Homo sapiens]
gi|5031839	60045	59.5	1.95	1	keratin 6A [Homo sapiens]_x0001_gi|1346344|sp|P02538.3|K2C6A_HUMAN RecName: Full=Keratin, type II cytoskeletal 6A; AltName: Full=Cytokeratin-6A; Short=CK 6A; AltName: Full=K6a keratin; AltName: Full=Cytokeratin-6D; Short=CK 6D; AltN
gi|84040267	59996.9	59.5	1.95	1	Keratin 6C [Homo sapiens]
gi|908803	60223.2	59.5	1.95	1	keratin type II [Homo sapiens]
gi|119703753	60067	59.5	1.95	1	keratin 6B [Homo sapiens]_x0001_gi|238054404|sp|P04259.5|K2C6B_HUMAN RecName: Full=Keratin, type II cytoskeletal 6B; AltName: Full=Cytokeratin-6B; Short=CK 6B; AltName: Full=K6b keratin_x0001_gi|908805|gb|AAC41771.1| keratin type II [Ho
gi|46812692	60075	59.5	1.95	1	Keratin 6A [Homo sapiens]
gi|109096775	59966.9	59.5	1.95	1	PREDICTED: keratin 6B isoform 7 [Macaca mulatta]
gi|109096781	59972.9	59.5	1.95	1	PREDICTED: keratin 6A isoform 18 [Macaca mulatta]
gi|114644570	59974.8	59.5	1.95	1	PREDICTED: keratin 6 isoform K6e [Pan troglodytes]
gi|114644572	60024	59.5	1.95	1	PREDICTED: keratin 6B [Pan troglodytes]
gi|119617033	60040	59.5	1.95	1	keratin 6B, isoform CRA_b [Homo sapiens]
gi|158261513	60031	59.5	1.95	1	unnamed protein product [Homo sapiens]
gi|189053798	60027	59.5	1.95	1	unnamed protein product [Homo sapiens]
gi|30584049	60158.1	59.5	1.95	1	Homo sapiens keratin 6A [synthetic construct]_x0001_gi|60653135|gb|AAX29262.1| keratin 6A [synthetic construct]_x0001_gi|60653137|gb|AAX29263.1| keratin 6A [synthetic construct]
gi|119617040	60125.9	59.5	1.94	1	keratin 5 (epidermolysis bullosa simplex, Dowling-Meara/Kobner/Weber-Cockayne types), isoform CRA_c [Homo sapiens]
gi|73996324	60937.1	59.5	1.94	1	PREDICTED: similar to Keratin, type II cytoskeletal 6A (Cytokeratin 6A) (CK 6A) (K6a keratin) isoform 9 [Canis familiaris]
gi|109096779	60947.8	59.5	1.94	1	PREDICTED: keratin 5 isoform 8 [Macaca mulatta]
gi|73996352	60583.3	59.5	1.93	1	PREDICTED: similar to Keratin, type II cytoskeletal 6A (Cytokeratin 6A) (CK 6A) (K6a keratin) isoform 2 [Canis familiaris]
gi|73996322	60621.4	59.5	1.93	1	PREDICTED: similar to Keratin, type II cytoskeletal 6A (Cytokeratin 6A) (CK 6A) (K6a keratin) isoform 8 [Canis familiaris]
gi|109096801	60353.1	59.5	1.93	1	PREDICTED: keratin 5 isoform 11 [Macaca mulatta]
gi|134085706	60819.9	59.5	1.93	1	keratin 6A [Bos taurus]_x0001_gi|133778363|gb|AAI23887.1| KRT6A protein [Bos taurus]
gi|109096795	60972.9	59.5	1.92	1	PREDICTED: keratin 5 isoform 13 [Macaca mulatta]
gi|109096797	61670.6	59.5	1.89	1	PREDICTED: keratin 5 isoform 14 [Macaca mulatta]
gi|9739163	62461.5	59.5	1.86	1	keratin 5 [Homo sapiens]_x0001_gi|307082|gb|AAA36143.1| keratin type II [Homo sapiens]
gi|18999435	62378.4	59.5	1.86	1	Keratin 5 [Homo sapiens]_x0001_gi|27503816|gb|AAH42132.1| Keratin 5 [Homo sapiens]_x0001_gi|47940601|gb|AAH71906.1| Keratin 5 [Homo sapiens]_x0001_gi|123986599|gb|ABM83772.1| keratin 5 (epidermolysis bullosa simplex, Dowling-Meara/Kobner/Weber-C
gi|119395754	62378.4	59.5	1.86	1	keratin 5 [Homo sapiens]_x0001_gi|143811411|sp|P13647.3|K2C5_HUMAN RecName: Full=Keratin, type II cytoskeletal 5; AltName: Full=Cytokeratin-5; Short=CK-5; AltName: Full=Keratin-5; Short=K5; AltName: Full=58 kDa cytokeratin_x0001_gi|1196
gi|218526449	62538.5	59.5	1.86	1	RecName: Full=Keratin, type II cytoskeletal 5; AltName: Full=Cytokeratin-5; Short=CK-5; AltName: Full=Keratin-5; Short=K5_x0001_gi|146741490|dbj|BAF62401.1| keratin 5 [Pan troglodytes verus]
gi|109096789	62605.6	59.5	1.85	1	PREDICTED: keratin 5 isoform 15 [Macaca mulatta]_x0001_gi|109096791|ref|XP_001097072.1| PREDICTED: keratin 5 isoform 20 [Macaca mulatta]
gi|194386492	65361	59.5	1.82	1	unnamed protein product [Homo sapiens]
gi|114671080	1.227	98.8	2.72	7	PREDICTED: fatty acid synthase isoform 2 [Pan troglodytes]
gi|38648667	273397	98.8	2.71	7	Fatty acid synthase [Homo sapiens]
gi|41584442	273447	98.8	2.71	7	fatty acid synthase [Homo sapiens]
gi|41872631	273424	98.8	2.71	7	fatty acid synthase [Homo sapiens]_x0001_gi|269849686|sp|P49327.3|FAS_HUMAN RecName: Full=Fatty acid synthase; Includes: RecName: Full=[Acyl-carrier-protein] S-acetyltransferase; Includes: RecName: Full=[Acyl-carrier-protein] S-mal
gi|114671082	1.227	98.8	2.71	7	PREDICTED: fatty acid synthase isoform 1 [Pan troglodytes]
gi|119610151	273423	98.8	2.71	7	fatty acid synthase [Homo sapiens]
gi|68533031	277368	98.8	2.67	7	FASN variant protein [Homo sapiens]
gi|915392	273089	98.7	2.27	6	fatty acid synthase [Homo sapiens]
gi|1049053	273100	98.5	2.16	6	encodes region of fatty acid synthase activity; FAS; multifunctional protein [Homo sapiens]
gi|13938279	101465	83.5	3.01	3	Unknown (protein for IMAGE:3138929) [Homo sapiens]
gi|134104911	46679.8	44.4	2.59	1	Chain A, Structure Of The Mat Domain Of Human Fas_x0001_gi|134104912|pdb|2JFD|B Chain B, Structure Of The Mat Domain Of Human Fas_x0001_gi|134104913|pdb|2JFD|C Chain C, Structure Of The Mat Domain Of Human Fas_x0001_gi|134104914|pdb|2JFD|D Chain D,
gi|178847374	23518.6	98.8	26.57	6	Chain A, Murine Trim21 In Complex With Murine Igg Fc
gi|21071089	50941.8	98.3	9.74	5	monoclonal antibody BBK-1 heavy chain [Mus musculus]
gi|18568340	51565.3	98.3	9.66	5	monoclonal antibody BBK-2 heavy chain [Mus musculus]
gi|195158	27337.3	87.7	11.65	3	immunoglobulin heavy chain C region [Mus musculus]
gi|88192140	41950.7	87.7	7.71	3	Chain A, Complement Receptor Chimaeric Conjugate Cr2-Ig_x0001_gi|88192141|pdb|2ATY|B Chain B, Complement Receptor Chimaeric Conjugate Cr2-Ig
gi|42543135	61755.1	87.7	5.26	3	Chain A, Model Of Mouse Crry-Ig Determined By Solution Scattering, Curve Fitting And Homology Modelling_x0001_gi|42543136|pdb|1NTL|B Chain B, Model Of Mouse Crry-Ig Determined By Solution Scattering, Curve Fitting And Homology Modelling
gi|23452700	13925.9	63.9	14.29	2	secretory immunoglobulin G heavy chain constant region [Mus musculus]
gi|6137570	11510.8	60.9	15.84	2	Chain A, Crystal Structure Of The Ch3 Domain From The Mak33 Antibody_x0001_gi|6137571|pdb|1CQK|B Chain B, Crystal Structure Of The Ch3 Domain From The Mak33 Antibody
gi|13399989	25217.5	59.5	4	1	Chain C, Crystal Structure Of The Neonatal Fc Receptor Complexed With A Heterodimeric Fc
gi|149044001	33128.6	59.5	2.99	1	rCG27656 [Rattus norvegicus]
gi|60688323	50160.7	59.5	1.97	1	LOC367586 protein [Rattus norvegicus]
gi|266618624	24375.5	98.8	25.7	6	Chain A, Murine Unglycosylated Igg Fc Fragment
gi|148686600	35669.5	98.8	17.03	6	mCG147635, isoform CRA_a [Mus musculus]
gi|195162	35725.5	98.8	16.98	6	stop codon and following 6 bases deleted; putative [Mus musculus]
gi|14091948	35740.6	98.8	16.98	6	immunoglobulin heavy chain constant region [Mus musculus domesticus]
gi|14091947	38453.7	98.8	15.8	6	immunoglobulin heavy chain constant region [Mus musculus domesticus]
gi|145203137	43351.4	98.8	14.03	6	immunoglobulin heavy chain gamma 1 constant region [synthetic construct]_x0001_gi|148686601|gb|EDL18548.1| mCG147635, isoform CRA_b [Mus musculus]
gi|26334307	46503.1	98.8	13.13	6	unnamed protein product [Mus musculus]
gi|5114265	48142.6	98.8	12.59	6	gamma1 heavy chain of Mab7 [Mus musculus]
gi|89477420	48985.3	98.8	12.5	6	mAb5C2 immunoglobulin gamma heavy chain [Mus musculus]
gi|89477416	49006.3	98.8	12.5	6	mAb7H11 immunoglobulin gamma heavy chain [Mus musculus]
gi|45789811	48829.3	98.8	12.47	6	anti-GD3 monoclonal antibody 3D2 immunoglobulin heavy chain [Mus musculus]
gi|89477408	49013.2	98.8	12.44	6	mAb6H4 immunoglobulin gamma heavy chain [Mus musculus]
gi|89477412	49181.4	98.8	12.44	6	mAb3F2 immunoglobulin gamma heavy chain [Mus musculus]
gi|148540420	48926.3	98.8	12.42	6	immunoglobulin gamma 1 heavy chain precursor [Mus musculus]
gi|7439167	1.04924e+06	98.8	12.39	6	monoclonal antibody 13-1 heavy chain - mouse (fragment)
gi|89477424	49522.9	98.8	12.28	6	mAb6H8 immunoglobulin gamma heavy chain [Mus musculus]
gi|1513182	50726.6	98.8	12.04	6	immunoglobulin gamma 1 chain [Mus musculus]
gi|425518	50602.3	98.8	12.01	6	anti-colorectal carcinoma heavy chain [Homo sapiens]
gi|1617396	50465.1	98.8	11.98	6	heavy chain of the monoclonal antibody MST2 [Mus musculus]
gi|50346336	50733.4	98.8	11.98	6	anti-PRSV coat protein monoclonal antibody PRSV-H 10-9 immunoglobulin heavy chain variable region [Mus musculus]
gi|261343156	50830.9	98.8	11.98	6	anti-FimA monoclonal antibody immunoglobulin gamma 1 heavy chain precursor [Mus musculus]
gi|32309129	50884.8	98.8	11.96	6	anti-potato cyst nematode monoclonal antibody MGR48 immunoglobulin heavy chain [Mus musculus]
gi|34785917	50588.7	98.8	11.96	6	Igh protein [Mus musculus]
gi|440121	50836	98.8	11.93	6	immunoglobulin gamma-chain [Mus musculus]
gi|12805309	50921.7	98.8	11.93	6	Igh protein [Mus musculus]
gi|26665404	51367.5	98.8	11.88	6	immunoglobulin gamma-1 heavy chain [Mus musculus]
gi|14198347	51359.6	98.8	11.88	6	Igh protein [Mus musculus]
gi|29786361	51370.2	98.8	11.85	6	anti-human CD19 monoclonal antibody 4G7 immunoglobulin gamma1 heavy chain [Mus musculus]
gi|23958196	51848.8	98.8	11.83	6	Igh protein [Mus musculus]
gi|74190484	51476.6	98.8	11.78	6	unnamed protein product [Mus musculus]
gi|19353759	51976.1	98.8	11.73	6	Igh protein [Mus musculus]
gi|3114312	47855.1	98.3	10.6	5	Chain B, Structure Of Immunoglobulin_x0001_gi|3114314|pdb|1IGY|D Chain D, Structure Of Immunoglobulin
gi|51653	27980.8	98.3	15.66	4	unnamed protein product [Mus musculus]
gi|195156	27395.5	98.3	15.54	4	immunoglobulin heavy chain constant region [Mus musculus domesticus]
gi|194434	35634.5	98.3	12.07	4	immunoglobulin gamma-chain [Mus musculus]_x0001_gi|1799554|dbj|BAA11358.1| Ig gamma-chain [Mus musculus]
gi|121040	35704.6	98.3	12.04	4	RecName: Full=Ig gamma-1 chain C region secreted form
gi|194435	43316.4	98.3	9.95	4	Ig gamma-1 chain C region membrane form [Mus musculus]_x0001_gi|1799553|dbj|BAA11357.1| Ig heavy-chain [Mus musculus]
gi|121038	43386.5	98.3	9.92	4	RecName: Full=Ig gamma-1 chain C region, membrane-bound form
gi|4096752	47957.3	98.3	8.92	4	anti-NGF30 antibody heavy-chain [Rattus norvegicus]
gi|21304449	50700.5	98.3	8.48	4	immunoglobulin gamma1 heavy chain [Mus musculus]
gi|28624968	51000	98.3	8.44	4	immunoglobulin heavy chain [Mus musculus]
gi|194362	50965.9	98.3	8.44	4	Ig heavy chain [Mus musculus]
gi|13097381	51007.7	98.3	8.42	4	Igh protein [Mus musculus]
gi|148589114	52123.1	98.3	8.3	4	anti-human c-myc monoclonal antibody 9E10 immunoglobulin gamma 1 heavy chain [Mus musculus]
gi|21304450	55294.8	98.3	7.77	4	immunoglobulin gamma1 heavy chain [Mus musculus]
gi|780265	17518.7	98.2	24.18	4	Ig gamma-1 heavy chain [Mus musculus]
gi|195160	23609.7	83.8	11.98	3	immunoglobulin heavy chain C region [Mus musculus]
gi|1333982	12247.4	83.5	18.42	2	immunoglobin gamma-1 heavy chain [Mus musculus]
gi|110077	17315.6	83.5	13.82	2	Ig gamma-1 chain C region (15C5) - mouse (fragment)_x0001_gi|51618|emb|CAA39804.1| immunoglobulin gamma-1 heavy chain [Mus musculus]
gi|3642624	20197.5	83.5	11.86	2	immunoglobulin gamma-1 heavy chain constant region [Mus musculus]
gi|109071319	80287.4	98.7	6.32	4	PREDICTED: heat shock 90kDa protein 1, beta isoform 2 [Macaca mulatta]
gi|109071323	68469.4	98.7	7.37	4	PREDICTED: heat shock protein 90kDa alpha (cytosolic), class B member 1 isoform 1 [Macaca mulatta]
gi|73972966	72897.7	98.7	6.92	4	PREDICTED: similar to heat shock protein 1, beta isoform 1 [Canis familiaris]_x0001_gi|109071325|ref|XP_001098716.1| PREDICTED: heat shock 90kDa protein 1, beta isoform 4 [Macaca mulatta]
gi|12082134	81962.9	98.7	6.17	4	heat shock protein 90 beta [Equus caballus]
gi|306891	83294.3	98.7	6.08	4	90kDa heat shock protein [Homo sapiens]_x0001_gi|225608|prf||1307197A heat shock protein 90kD
gi|20149594	83264.2	98.7	6.08	4	heat shock 90kDa protein 1, beta [Homo sapiens]_x0001_gi|17865718|sp|P08238.4|HS90B_HUMAN RecName: Full=Heat shock protein HSP 90-beta; Short=HSP 90; AltName: Full=HSP 84_x0001_gi|386786|gb|AAA36026.1| 90 kD heat shock protein [Homo sapi
gi|40556608	83281.3	98.7	6.08	4	heat shock protein 1, beta [Mus musculus]_x0001_gi|148747365|ref|NP_001004082.3| heat shock protein 90kDa alpha (cytosolic), class B member 1 [Rattus norvegicus]_x0001_gi|122065211|sp|P34058.4|HS90B_RAT RecName: Full=Heat shock protein H
gi|126352614	83237.2	98.7	6.08	4	heat shock protein 90 [Equus caballus]_x0001_gi|109071309|ref|XP_001099027.1| PREDICTED: heat shock 90kDa protein 1, beta isoform 6 [Macaca mulatta]_x0001_gi|109071311|ref|XP_001099237.1| PREDICTED: heat shock 90kDa protein 1, beta i
gi|197100267	83238.2	98.7	6.08	4	heat shock protein 90kDa alpha (cytosolic), class B member 1 [Pongo abelii]_x0001_gi|75070555|sp|Q5R710.1|HS90B_PONAB RecName: Full=Heat shock protein HSP 90-beta_x0001_gi|55731477|emb|CAH92450.1| hypothetical protein [Pongo abelii]
gi|74147026	83223.2	98.7	6.08	4	unnamed protein product [Mus musculus]
gi|51859516	83341.4	98.7	6.08	4	Heat shock protein 90kDa alpha (cytosolic), class B member 1 [Rattus norvegicus]
gi|91234898	83282.2	98.7	6.08	4	84 kDa heat shock protein [Rattus norvegicus]
gi|109071321	83589.3	98.7	6.08	4	PREDICTED: heat shock 90kDa protein 1, beta isoform 3 [Macaca mulatta]
gi|90075818	83165.1	98.7	6.08	4	unnamed protein product [Macaca fascicularis]
gi|194039391	83253.2	98.7	6.08	4	PREDICTED: heat shock 90kD protein 1, beta [Sus scrofa]
gi|6807647	84843.5	98.7	5.97	4	hypothetical protein [Homo sapiens]
gi|161408087	83669.8	98.7	6.04	4	heat shock protein 90b [Alligator mississippiensis]
gi|256089	83316.4	98.7	6.08	4	heat shock protein 90 [Rattus sp.]
gi|123681	83325.3	98.7	6.08	4	RecName: Full=Heat shock protein HSP 90-beta; AltName: Full=HSP 84; AltName: Full=Tumor-specific transplantation 84 kDa antigen; Short=TSTA
gi|194027	83232.2	98.7	6.08	4	heat-shock protein hsp84 [Mus musculus]
gi|309317	6082616	98.7	6.08	4	84 kD heat shock protein [Mus musculus]
gi|114607584	115405	98.7	4.29	4	PREDICTED: similar to heat shock protein 90 [Pan troglodytes]
gi|59894160	65262.5	98.2	7.52	4	heat shock protein 90 [Pythium graminicola]
gi|73972964	54544.1	98.2	7.29	3	PREDICTED: similar to heat shock protein 1, beta isoform 5 [Canis familiaris]
gi|59894156	3.06379e+06	98.2	6.24	3	heat shock protein 90 [Phytophthora palmivora]
gi|59894142	65362.5	98.2	6.1	3	heat shock protein 90 [Brevilegnia macrospora]
gi|71895891	83211.2	98.2	4.84	3	heat shock protein 90kDa alpha (cytosolic), class B member 1 [Xenopus (Silurana) tropicalis]_x0001_gi|60688070|gb|AAH90610.1| Heat shock protein 90kDa alpha (cytosolic), class B member 1 [Xenopus tropicalis]
gi|148232054	82957.1	98.2	4.85	3	heat shock 90kDa protein beta [Xenopus laevis]_x0001_gi|50603918|gb|AAH77195.1| Hsp90beta protein [Xenopus laevis]_x0001_gi|54873686|gb|AAV41061.1| Hsp90beta [Xenopus laevis]
gi|185132934	83318.5	98.2	4.85	3	heat shock protein hsp90 beta [Salmo salar]_x0001_gi|4835864|gb|AAD30275.1|AF135117_1 heat shock protein hsp90 beta [Salmo salar]
gi|185132161	83418.5	98.2	4.84	3	heat shock 90kDa protein 1 beta isoform a [Oncorhynchus mykiss]_x0001_gi|60223015|dbj|BAD90023.1| heat shock 90kDa protein 1 beta isoform a [Oncorhynchus mykiss]
gi|185136252	83392.7	98.2	4.83	3	heat shock 90kDa protein 1 beta isoform b [Oncorhynchus mykiss]_x0001_gi|60223017|dbj|BAD90024.1| heat shock 90kDa protein 1 beta isoform b [Oncorhynchus mykiss]
gi|37623887	1.08316e+06	98.2	4.83	3	HSP-90 [Dicentrarchus labrax]
gi|110226524	83137.2	98.2	4.83	3	heat shock protein 90 beta [Paralichthys olivaceus]
gi|156124928	83874.9	98.2	4.8	3	heat shock protein 90 [Scophthalmus maximus]
gi|159576742	83534.5	98.2	4.81	3	cytosolic heat shock protein 90 beta [Solea senegalensis]
gi|151573943	82684.5	98	5.58	4	heat shock protein 90 [Crassostrea gigas]
gi|149044121	66811.4	97.9	5.71	3	rCG27814, isoform CRA_a [Rattus norvegicus]
gi|9082289	72873.6	97.9	5.22	3	chaperone protein HSP90 beta [Homo sapiens]
gi|109071327	72846.6	97.9	5.22	3	PREDICTED: heat shock 90kDa protein 1, beta isoform 5 [Macaca mulatta]
gi|148686720	73110.3	97.9	5.22	3	mCG14932, isoform CRA_c [Mus musculus]
gi|62914009	73826.7	97.9	5.17	3	HSP90AA1 protein [Homo sapiens]
gi|39644662	74792.8	97.9	5.08	3	HSP90AB1 protein [Homo sapiens]
gi|74188945	84788.9	97.9	4.5	3	unnamed protein product [Mus musculus]
gi|118601868	83253.2	97.9	4.56	3	heat shock 90kDa protein 1, beta [Bos taurus]_x0001_gi|75072499|sp|Q76LV1.3|HS90B_BOVIN RecName: Full=Heat shock protein HSP 90-beta_x0001_gi|34392345|dbj|BAC82488.1| 90-kDa heat shock protein beta [Bos taurus]_x0001_gi|95767684|gb|ABF5732
gi|47604960	83427.5	97.9	4.55	3	heat shock 90kDa protein 1, beta [Gallus gallus]_x0001_gi|417155|sp|Q04619.1|HS90B_CHICK RecName: Full=Heat shock cognate protein HSP 90-beta_x0001_gi|65322|emb|CAA49704.1| heat shock protein 90 beta [Gallus gallus]
gi|149069300	22918.7	97.9	15.05	3	rCG43497, isoform CRA_b [Rattus norvegicus]
gi|52696092	24641.9	97.9	14.09	3	Chain A, Human Hsp90-Beta With Pu3 (9-Butyl-8(3,4,5-Trimethoxy- Benzyl)-9h-Purin-6-Ylamine)
gi|120577592	30338.8	97.9	11.52	3	LOC100037031 protein [Xenopus laevis]_x0001_gi|120577610|gb|AAI30149.1| LOC100037031 protein [Xenopus laevis]
gi|73972960	36906.1	97.9	9.57	3	PREDICTED: similar to heat shock protein 1, beta isoform 3 [Canis familiaris]
gi|33987931	40295.2	97.9	8.83	3	HSP90AB1 protein [Homo sapiens]
gi|149069299	69035.6	97.9	5.12	3	rCG43497, isoform CRA_a [Rattus norvegicus]
gi|194386896	79194.8	97.9	4.52	3	unnamed protein product [Homo sapiens]
gi|194378142	82170	97.9	4.34	3	unnamed protein product [Homo sapiens]
gi|257357667	83378.4	97.9	4.28	3	heat shock protein 90kDa beta (cytosolic), class B member 1 [Coturnix japonica]
gi|257357814	83381.4	97.9	4.28	3	heat shock protein 90kDa beta (cytosolic), class B member 1 [Coturnix japonica]
gi|189313908	84367.4	86.5	4.22	3	hsp82 [Adineta vaga]
gi|189313934	84443.6	86.5	4.22	3	hsp82 [Adineta vaga]
gi|193201809	84427.6	86.5	4.22	3	hsp82 [Adineta vaga]
gi|260951083	85003.6	85.9	4.32	3	hypothetical protein CLUG_00997 [Clavispora lusitaniae ATCC 42720]_x0001_gi|238847410|gb|EEQ36874.1| hypothetical protein CLUG_00997 [Clavispora lusitaniae ATCC 42720]
gi|183178928	85024.2	85.6	3.92	3	82 kDa heat shock protein [Philodina roseola]
gi|183178974	84992.2	85.6	3.92	3	82 kDa heat shock protein [Philodina roseola]
gi|110277429	63562.7	85.5	5.98	3	heat shock protein 90 [Chilodonella uncinata]
gi|156986848	56908.8	83.1	4.83	2	heat shock protein 90 [Phytophthora porri]
gi|156986818	1057232	83.1	4.8	2	heat shock protein 90 [Phytophthora mirabilis]
gi|54300508	62941.5	83.1	4.36	2	heat shock protein 90 [Kryptoperidinium foliaceum]
gi|156987114	1.06131e+06	83.1	4.47	2	heat shock protein 90 [Phytophthora brassicae]
gi|156986836	61832.4	83.1	4.44	2	heat shock protein 90 [Phytophthora brassicae]_x0001_gi|156987108|gb|ABU99532.1| heat shock protein 90 [Phytophthora brassicae]_x0001_gi|156987112|gb|ABU99534.1| heat shock protein 90 [Phytophthora brassicae]
gi|156987034	61919.5	83.1	4.43	2	heat shock protein 90 [Phytophthora brassicae]
gi|156986896	63033.9	83.1	4.36	2	heat shock protein 90 [Phytophthora kernoviae]
gi|156986796	64464.6	83.1	4.27	2	heat shock protein 90 [Phytophthora foliorum]
gi|156986864	64645.9	83.1	4.26	2	heat shock protein 90 [Phytophthora inundata]
gi|156986970	64617.9	83.1	4.26	2	heat shock protein 90 [Phytophthora sp. P11555]
gi|156987140	64564.8	83.1	4.26	2	heat shock protein 90 [Phytophthora sp. SY1982]
gi|156986956	64734.1	83.1	4.26	2	heat shock protein 90 [Phytophthora polonica]
gi|156987122	64608.8	83.1	4.26	2	heat shock protein 90 [Phytophthora primulae]
gi|156987138	64816.1	83.1	4.25	2	heat shock protein 90 [Phytophthora sp. PDA576]
gi|156987084	64962.2	83.1	4.23	2	heat shock protein 90 [Phytophthora medicaginis]
gi|59894140	65072	83.1	4.23	2	heat shock protein 90 [Apodachlya brachynema]
gi|156986778	65317.5	83.1	4.2	2	heat shock protein 90 [Phytophthora kernoviae]
gi|156986952	65419.9	83.1	4.2	2	heat shock protein 90 [Phytophthora polonica]
gi|156986998	65558.9	83.1	4.19	2	heat shock protein 90 [Phytophthora capsici]
gi|156986938	1065686	83.1	4.18	2	heat shock protein 90 [Phytophthora sp. P8619]
gi|156986954	65799.2	83.1	4.18	2	heat shock protein 90 [Phytophthora polonica]
gi|156987006	65656	83.1	4.18	2	heat shock protein 90 [Phytophthora erythroseptica]
gi|84105345	67320.6	83.1	4.1	2	cytosolic heat shock protein 90 [Carpediemonas membranifera]
gi|156986928	65870.3	83.1	4.17	2	heat shock protein 90 [Phytophthora humicola]_x0001_gi|156986966|gb|ABU99461.1| heat shock protein 90 [Phytophthora sp. P11491]
gi|156987106	66115.6	83.1	4.16	2	heat shock protein 90 [Phytophthora phaseoli]
gi|156986750	66198.7	83.1	4.15	2	heat shock protein 90 [Phytophthora nicotianae]
gi|156987004	66225.7	83.1	4.15	2	heat shock protein 90 [Phytophthora pseudotsugae]
gi|156986982	1.06603e+06	83.1	4.15	2	heat shock protein 90 [Phytophthora cuyabensis]
gi|156986984	66216.7	83.1	4.15	2	heat shock protein 90 [Phytophthora lagoariana]_x0001_gi|156986986|gb|ABU99471.1| heat shock protein 90 [Phytophthora lagoariana]
gi|156987008	66163.6	83.1	4.14	2	heat shock protein 90 [Phytophthora undulata]
gi|156986768	66515.9	83.1	4.13	2	heat shock protein 90 [Phytophthora infestans]
gi|156986782	66543	83.1	4.13	2	heat shock protein 90 [Phytophthora captiosa]
gi|156986872	66658.2	83.1	4.13	2	heat shock protein 90 [Phytophthora megakarya]_x0001_gi|156986874|gb|ABU99415.1| heat shock protein 90 [Phytophthora megakarya]_x0001_gi|156986876|gb|ABU99416.1| heat shock protein 90 [Phytophthora megakarya]
gi|156986988	1.06633e+06	83.1	4.13	2	heat shock protein 90 [Phytophthora cuyabensis]
gi|156987036	66582.1	83.1	4.13	2	heat shock protein 90 [Phytophthora gonapodyides]
gi|156987078	66654.2	83.1	4.13	2	heat shock protein 90 [Phytophthora sp. P10090]_x0001_gi|156987142|gb|ABU99549.1| heat shock protein 90 [Phytophthora quercetorum]
gi|156986726	66552	83.1	4.12	2	heat shock protein 90 [Phytophthora europaea]_x0001_gi|156986728|gb|ABU99342.1| heat shock protein 90 [Phytophthora europaea]_x0001_gi|156986730|gb|ABU99343.1| heat shock protein 90 [Phytophthora europaea]_x0001_gi|156986808|gb|ABU99382.1| heat
gi|156986732	66583.1	83.1	4.12	2	heat shock protein 90 [Phytophthora multivesiculata]_x0001_gi|156986760|gb|ABU99358.1| heat shock protein 90 [Phytophthora multivesiculata]
gi|156986738	2066486	83.1	4.12	2	heat shock protein 90 [Phytophthora sp. P10335]
gi|156986740	66626.1	83.1	4.12	2	heat shock protein 90 [Phytophthora citricola]_x0001_gi|156986776|gb|ABU99366.1| heat shock protein 90 [Phytophthora sp. P10679]_x0001_gi|156986922|gb|ABU99439.1| heat shock protein 90 [Phytophthora sp. P7491]
gi|156986742	1.06649e+06	83.1	4.12	2	heat shock protein 90 [Phytophthora ramorum]_x0001_gi|156987096|gb|ABU99526.1| heat shock protein 90 [Phytophthora ramorum]_x0001_gi|156987098|gb|ABU99527.1| heat shock protein 90 [Phytophthora ramorum]
gi|156986744	66596.1	83.1	4.12	2	heat shock protein 90 [Phytophthora richardiae]_x0001_gi|156986832|gb|ABU99394.1| heat shock protein 90 [Phytophthora erythroseptica]_x0001_gi|156986838|gb|ABU99397.1| heat shock protein 90 [Phytophthora richardiae]_x0001_gi|156987000|gb|ABU994
gi|156986746	66612.1	83.1	4.12	2	heat shock protein 90 [Phytophthora capsici]_x0001_gi|156986770|gb|ABU99363.1| heat shock protein 90 [Phytophthora capsici]_x0001_gi|156986846|gb|ABU99401.1| heat shock protein 90 [Phytophthora meadii]_x0001_gi|156986850|gb|ABU99403.1| heat sho
gi|156986754	66699.3	83.1	4.12	2	heat shock protein 90 [Phytophthora sp. P10456]
gi|156986756	66629.2	83.1	4.12	2	heat shock protein 90 [Phytophthora sp. P10457]_x0001_gi|156986936|gb|ABU99446.1| heat shock protein 90 [Phytophthora sp. P8618]
gi|156986758	66640.2	83.1	4.12	2	heat shock protein 90 [Phytophthora citricola]_x0001_gi|156986948|gb|ABU99452.1| heat shock protein 90 [Phytophthora citricola]
gi|156986766	66596.1	83.1	4.12	2	heat shock protein 90 [Phytophthora kelmania]_x0001_gi|156987064|gb|ABU99510.1| heat shock protein 90 [Phytophthora sp. P3103]_x0001_gi|156987134|gb|ABU99545.1| heat shock protein 90 [Phytophthora drechsleri]
gi|156986772	66629.1	83.1	4.12	2	heat shock protein 90 [Phytophthora infestans]_x0001_gi|156986774|gb|ABU99365.1| heat shock protein 90 [Phytophthora infestans]
gi|156986780	66699.2	83.1	4.12	2	heat shock protein 90 [Phytophthora nicotianae]_x0001_gi|156987028|gb|ABU99492.1| heat shock protein 90 [Phytophthora nicotianae]
gi|156986784	66656.1	83.1	4.12	2	heat shock protein 90 [Phytophthora captiosa]
gi|156986786	66546.9	83.1	4.12	2	heat shock protein 90 [Phytophthora porri]
gi|156986788	66657.1	83.1	4.12	2	heat shock protein 90 [Phytophthora foliorum]_x0001_gi|156986790|gb|ABU99373.1| heat shock protein 90 [Phytophthora foliorum]
gi|156986792	66566	83.1	4.12	2	heat shock protein 90 [Phytophthora uliginosa]_x0001_gi|156986884|gb|ABU99420.1| heat shock protein 90 [Phytophthora uliginosa]
gi|156986794	66641.1	83.1	4.12	2	heat shock protein 90 [Phytophthora foliorum]
gi|156986798	66695.3	83.1	4.12	2	heat shock protein 90 [Phytophthora melonis]_x0001_gi|156986810|gb|ABU99383.1| heat shock protein 90 [Phytophthora sinensis]_x0001_gi|156986820|gb|ABU99388.1| heat shock protein 90 [Phytophthora vignae]_x0001_gi|156986972|gb|ABU99464.1| heat sh
gi|156986800	66711.3	83.1	4.12	2	heat shock protein 90 [Phytophthora arecae]_x0001_gi|156986802|gb|ABU99379.1| heat shock protein 90 [Phytophthora arecae]_x0001_gi|156986978|gb|ABU99467.1| heat shock protein 90 [Phytophthora palmivora]_x0001_gi|156987016|gb|ABU99486.1| heat sh
gi|156986804	66726.3	83.1	4.12	2	heat shock protein 90 [Phytophthora heveae]_x0001_gi|156986828|gb|ABU99392.1| heat shock protein 90 [Phytophthora katsurae]_x0001_gi|156987086|gb|ABU99521.1| heat shock protein 90 [Phytophthora heveae]_x0001_gi|156987116|gb|ABU99536.1| heat sho
gi|156986806	66596.1	83.1	4.12	2	heat shock protein 90 [Phytophthora capsici]
gi|156986812	66685.3	83.1	4.12	2	heat shock protein 90 [Phytophthora cinnamomi]_x0001_gi|156986816|gb|ABU99386.1| heat shock protein 90 [Phytophthora cinnamomi]_x0001_gi|156986824|gb|ABU99390.1| heat shock protein 90 [Phytophthora cinnamomi]_x0001_gi|156986852|gb|ABU99404.1| h
gi|156986822	66681.3	83.1	4.12	2	heat shock protein 90 [Phytophthora sojae]_x0001_gi|156986946|gb|ABU99451.1| heat shock protein 90 [Phytophthora niederhauserii]_x0001_gi|156986950|gb|ABU99453.1| heat shock protein 90 [Phytophthora niederhauserii]
gi|156986826	2.0665e+06	83.1	4.12	2	heat shock protein 90 [Phytophthora quininea]_x0001_gi|156987030|gb|ABU99493.1| heat shock protein 90 [Phytophthora sp. P1087]
gi|156986830	66531.9	83.1	4.12	2	heat shock protein 90 [Phytophthora cambivora]_x0001_gi|156987020|gb|ABU99488.1| heat shock protein 90 [Phytophthora alni]_x0001_gi|156987042|gb|ABU99499.1| heat shock protein 90 [Phytophthora cambivora]_x0001_gi|156987058|gb|ABU99507.1| heat s
gi|156986840	66585.1	83.1	4.12	2	heat shock protein 90 [Phytophthora lateralis]_x0001_gi|156986906|gb|ABU99431.1| heat shock protein 90 [Phytophthora lateralis]
gi|156986844	66680.2	83.1	4.12	2	heat shock protein 90 [Phytophthora clandestina]
gi|156986854	66598.1	83.1	4.12	2	heat shock protein 90 [Phytophthora medicaginis]
gi|156986866	66681.3	83.1	4.12	2	heat shock protein 90 [Phytophthora cinnamomi]_x0001_gi|156987012|gb|ABU99484.1| heat shock protein 90 [Phytophthora cinnamomi]
gi|156986868	66684.2	83.1	4.12	2	heat shock protein 90 [Phytophthora tentaculata]_x0001_gi|156986924|gb|ABU99440.1| heat shock protein 90 [Phytophthora tentaculata]
gi|156986870	66669.2	83.1	4.12	2	heat shock protein 90 [Phytophthora nicotianae]_x0001_gi|156987056|gb|ABU99506.1| heat shock protein 90 [Phytophthora nicotianae]_x0001_gi|156987080|gb|ABU99518.1| heat shock protein 90 [Phytophthora nicotianae]_x0001_gi|156987092|gb|ABU99524.1
gi|156986878	66696.2	83.1	4.12	2	heat shock protein 90 [Phytophthora pseudotsugae]_x0001_gi|156986916|gb|ABU99436.1| heat shock protein 90 [Phytophthora idaei]_x0001_gi|156986960|gb|ABU99458.1| heat shock protein 90 [Phytophthora cactorum]_x0001_gi|156986962|gb|ABU99459.1| hea
gi|156986886	66695.2	83.1	4.12	2	heat shock protein 90 [Phytophthora sp. P10442]_x0001_gi|156987024|gb|ABU99490.1| heat shock protein 90 [Phytophthora quercina]_x0001_gi|156987054|gb|ABU99505.1| heat shock protein 90 [Phytophthora quercina]
gi|156986890	66617	83.1	4.12	2	heat shock protein 90 [Phytophthora kernoviae]
gi|156986892	66642.1	83.1	4.12	2	heat shock protein 90 [Phytophthora fallax]
gi|156986898	66698.3	83.1	4.12	2	heat shock protein 90 [Phytophthora megasperma]_x0001_gi|156986976|gb|ABU99466.1| heat shock protein 90 [Phytophthora sp. P1679]
gi|156986902	1066568	83.1	4.12	2	heat shock protein 90 [Phytophthora hedraiandra]_x0001_gi|156986964|gb|ABU99460.1| heat shock protein 90 [Phytophthora cactorum]
gi|156986908	66571.1	83.1	4.12	2	heat shock protein 90 [Phytophthora sp. P1825]
gi|156986910	1066567	83.1	4.12	2	heat shock protein 90 [Phytophthora cajani]
gi|156986912	66744.3	83.1	4.12	2	heat shock protein 90 [Phytophthora iranica]
gi|156986920	66582.1	83.1	4.12	2	heat shock protein 90 [Phytophthora trifolii]
gi|156986926	66611	83.1	4.12	2	heat shock protein 90 [Phytophthora boehmeriae]
gi|156986930	66687.3	83.1	4.12	2	heat shock protein 90 [Phytophthora insolita]_x0001_gi|156986940|gb|ABU99448.1| heat shock protein 90 [Phytophthora insolita]
gi|156986932	2.06641e+06	83.1	4.12	2	heat shock protein 90 [Phytophthora andina]
gi|156986934	1066554	83.1	4.12	2	heat shock protein 90 [Phytophthora andina]
gi|156986958	1.06648e+06	83.1	4.12	2	heat shock protein 90 [Phytophthora sansomea]
gi|156986980	66663.2	83.1	4.12	2	heat shock protein 90 [Phytophthora sulawesiensis]
gi|156986992	1066498	83.1	4.12	2	heat shock protein 90 [Phytophthora inflata]
gi|156987040	1066604	83.1	4.12	2	heat shock protein 90 [Phytophthora sp. P6875]
gi|156987052	66571.1	83.1	4.12	2	heat shock protein 90 [Phytophthora ramorum]_x0001_gi|156987094|gb|ABU99525.1| heat shock protein 90 [Phytophthora sp. P10080]
gi|156987060	66683.2	83.1	4.12	2	heat shock protein 90 [Phytophthora bisheria]_x0001_gi|156987100|gb|ABU99528.1| heat shock protein 90 [Phytophthora bisheria]
gi|156987066	66718.2	83.1	4.12	2	heat shock protein 90 [Phytophthora sp. P3007]
gi|156987076	66555.1	83.1	4.12	2	heat shock protein 90 [Phytophthora cuyabensis]
gi|156987082	1.0665e+06	83.1	4.12	2	heat shock protein 90 [Phytophthora ramorum]
gi|156987088	1066541	83.1	4.12	2	heat shock protein 90 [Phytophthora mexicana]
gi|156987102	66715.2	83.1	4.12	2	heat shock protein 90 [Phytophthora phaseoli]_x0001_gi|156987104|gb|ABU99530.1| heat shock protein 90 [Phytophthora phaseoli]
gi|156987126	66655.1	83.1	4.12	2	heat shock protein 90 [Phytophthora ipomoeae]_x0001_gi|156987128|gb|ABU99542.1| heat shock protein 90 [Phytophthora ipomoeae]_x0001_gi|156987130|gb|ABU99543.1| heat shock protein 90 [Phytophthora ipomoeae]
gi|156987132	66686.2	83.1	4.12	2	heat shock protein 90 [Phytophthora capsici]
gi|156986724	66743.3	83.1	4.12	2	heat shock protein 90 [Phytophthora nemorosa]_x0001_gi|156986764|gb|ABU99360.1| heat shock protein 90 [Phytophthora nemorosa]
gi|156986734	66759.3	83.1	4.12	2	heat shock protein 90 [Phytophthora drechsleri]
gi|156986736	66699.2	83.1	4.12	2	heat shock protein 90 [Phytophthora hibernalis]_x0001_gi|156986860|gb|ABU99408.1| heat shock protein 90 [Phytophthora hibernalis]_x0001_gi|156987090|gb|ABU99523.1| heat shock protein 90 [Phytophthora hibernalis]
gi|156986748	66757.4	83.1	4.12	2	heat shock protein 90 [Phytophthora psychrophila]
gi|156986752	66757.4	83.1	4.12	2	heat shock protein 90 [Phytophthora pseudosyringae]_x0001_gi|156986888|gb|ABU99422.1| heat shock protein 90 [Phytophthora pseudosyringae]
gi|156986814	66641	83.1	4.12	2	heat shock protein 90 [Phytophthora syringae]
gi|156986842	66787.4	83.1	4.12	2	heat shock protein 90 [Phytophthora ilicis]_x0001_gi|156986918|gb|ABU99437.1| heat shock protein 90 [Phytophthora ilicis]
gi|156986894	66730.2	83.1	4.12	2	heat shock protein 90 [Phytophthora kernoviae]
gi|156986904	66745.3	83.1	4.12	2	heat shock protein 90 [Phytophthora trifolii]
gi|156986914	66845.5	83.1	4.12	2	heat shock protein 90 [Phytophthora gonapodyides]
gi|156986990	66875.5	83.1	4.12	2	heat shock protein 90 [Phytophthora megasperma]
gi|156986996	66673.2	83.1	4.12	2	heat shock protein 90 [Phytophthora primulae]_x0001_gi|156987124|gb|ABU99540.1| heat shock protein 90 [Phytophthora primulae]
gi|156987014	66695.1	83.1	4.12	2	heat shock protein 90 [Phytophthora cambivora]
gi|156987022	66845.3	83.1	4.12	2	heat shock protein 90 [Pythium vexans]
gi|156987032	66755.4	83.1	4.12	2	heat shock protein 90 [Phytophthora psychrophila]
gi|156987044	66675	83.1	4.12	2	heat shock protein 90 [Phytophthora syringae]
gi|156987046	66831.3	83.1	4.12	2	heat shock protein 90 [Phytophthora sp. P10690]
gi|156987070	66801.3	83.1	4.12	2	heat shock protein 90 [Phytophthora sp. P10705]
gi|156986880	66890.4	83.1	4.11	2	heat shock protein 90 [Phytophthora macrochlamydospora]_x0001_gi|156986882|gb|ABU99419.1| heat shock protein 90 [Phytophthora macrochlamydospora]
gi|156987074	66996.5	83.1	4.11	2	heat shock protein 90 [Phytophthora macrochlamydospora]
gi|156986762	66911.3	83.1	4.1	2	heat shock protein 90 [Phytophthora alni]
gi|156986858	67094.6	83.1	4.1	2	heat shock protein 90 [Phytophthora phaseoli]
gi|156986900	66962.5	83.1	4.1	2	heat shock protein 90 [Phytophthora multivesiculata]
gi|3212009	83334.4	83.1	3.31	2	heat shock protein hsp90beta [Danio rerio]
gi|2791863	83359.4	83.1	3.31	2	heat shock protein 90-beta [Danio rerio]
gi|226823315	83357.4	83.1	3.31	2	heat shock protein 90kDa alpha, class B member 1 [Danio rerio]_x0001_gi|109835356|sp|O57521.2|HS90B_DANRE RecName: Full=Heat shock protein HSP 90-beta_x0001_gi|40807203|gb|AAH65359.1| Hsp90ab1 protein [Danio rerio]_x0001_gi|148726476|emb|CAN8
gi|38885113	1.04231e+06	83.1	6.54	2	heat shock protein 90 [Monocystis agilis]
gi|145524974	47086.5	83.1	5.93	2	hypothetical protein [Paramecium tetraurelia strain d4-2]_x0001_gi|124415853|emb|CAK80912.1| unnamed protein product [Paramecium tetraurelia]
gi|116222181	50534.4	83.1	5.48	2	Hsp90 [Thaumatomonas sp. TMT002]
gi|116222179	50589.7	83.1	5.48	2	Hsp90 [Thaumatomonas sp. TMT002]
gi|68077073	53293.4	83.1	5.25	2	hypothetical protein [Plasmodium berghei strain ANKA]_x0001_gi|56501389|emb|CAH98933.1| hypothetical protein PB001532.02.0 [Plasmodium berghei]
gi|83032707	53322.4	83.1	5.24	2	heat shock protein 81-2 [Plasmodium yoelii yoelii str. 17XNL]_x0001_gi|23486135|gb|EAA20722.1| putative heat shock protein 81-2 [Plasmodium yoelii yoelii]
gi|116222147	54110.6	83.1	5.11	2	Hsp90 [Mesostigma viride]
gi|88770696	55543.3	83.1	5.01	2	82 kDa heat shock protein [Rhodomonas salina]
gi|38885098	1.05956e+06	83.1	4.65	2	heat shock protein 90 [uncultured dinoflagellate BSL-2003]
gi|99643817	63201.9	83.1	4.4	2	heat shock protein 90 [Karenia brevis]
gi|9837420	63296.5	83.1	4.36	2	heat shock protein 90 [Paramecium tetraurelia]
gi|9837422	63281.5	83.1	4.36	2	heat shock protein 90 [Paramecium tetraurelia]
gi|40287628	64047.8	83.1	4.35	2	heat shock protein 90 [Cryptosporidium parvum]
gi|38885012	64508.5	83.1	4.31	2	heat shock protein 90 [Heterocapsa triquetra]
gi|81159220	64789.8	83.1	4.3	2	molecular chaperone [Hanusia phi]
gi|38885039	65249.5	83.1	4.28	2	heat shock protein 90 [Tetrahymena bergeri]
gi|38884985	1.06504e+06	83.1	4.27	2	heat shock protein 90 [Halteria grandinella]
gi|54300510	64819.9	83.1	4.27	2	heat shock protein 90 [Kryptoperidinium foliaceum]
gi|118766792	66236.9	83.1	4.58	3	heat shock protein 90 [Oxymonadida environmental sample]_x0001_gi|118766798|gb|ABL11336.1| heat shock protein 90 [Oxymonadida environmental sample]
gi|118766758	66208.8	83.1	4.58	3	heat shock protein 90 [Oxymonadida environmental sample]
gi|118766768	66178.8	83.1	4.58	3	heat shock protein 90 [Oxymonadida environmental sample]
gi|118766774	66237.8	83.1	4.58	3	heat shock protein 90 [Oxymonadida environmental sample]
gi|118766772	66149.8	83.1	4.58	3	heat shock protein 90 [Oxymonadida environmental sample]
gi|118766776	66251.8	83.1	4.58	3	heat shock protein 90 [Oxymonadida environmental sample]
gi|118766756	66278.9	83.1	4.58	3	heat shock protein 90 [Oxymonadida environmental sample]
gi|118766796	66277.9	83.1	4.58	3	heat shock protein 90 [Oxymonadida environmental sample]
gi|118766766	66164.8	83.1	4.58	3	heat shock protein 90 [Oxymonadida environmental sample]
gi|118766762	66142.9	83.1	4.58	3	heat shock protein 90 [Oxymonadida environmental sample]
gi|118766782	66206.9	83.1	4.58	3	heat shock protein 90 [Oxymonadida environmental sample]
gi|118766790	66216.9	83.1	4.58	3	heat shock protein 90 [Oxymonadida environmental sample]
gi|118766800	66198.9	83.1	4.58	3	heat shock protein 90 [Oxymonadida environmental sample]_x0001_gi|118766802|gb|ABL11338.1| heat shock protein 90 [Oxymonadida environmental sample]
gi|118766760	66162.9	83.1	4.58	3	heat shock protein 90 [Oxymonadida environmental sample]
gi|118766794	66179.9	83.1	4.58	3	heat shock protein 90 [Oxymonadida environmental sample]
gi|118766786	66128.7	83.1	4.58	3	heat shock protein 90 [Oxymonadida environmental sample]
gi|118766780	66244.8	83.1	4.58	3	heat shock protein 90 [Oxymonadida environmental sample]
gi|118766778	66170.8	83.1	4.58	3	heat shock protein 90 [Oxymonadida environmental sample]
gi|118766770	66247.9	83.1	4.58	3	heat shock protein 90 [Oxymonadida environmental sample]
gi|118766788	66360	83.1	4.57	3	heat shock protein 90 [Oxymonadida environmental sample]
gi|116222165	64663.4	83.1	4.26	2	Hsp90 [Synura sphagnicola]
gi|99643830	65383.4	83.1	4.24	2	heat shock protein 90 [Karenia mikimotoi]
gi|38885083	65939	83.1	4.2	2	heat shock protein 90 [Prorocentrum micans]
gi|59894146	66997.4	83.1	4.15	2	heat shock protein 90 [Heterocapsa triquetra]
gi|99643822	66762	83.1	4.15	2	heat shock protein 90 [Alexandrium tamarense]
gi|38885026	67182.6	83.1	4.14	2	heat shock protein 90 [Lessardia elongata]
gi|59894164	65491.6	83.1	4.2	2	heat shock protein 90 [Thraustotheca clavata]
gi|59894158	65732.9	83.1	4.17	2	heat shock protein 90 [Plectospira myriandra]
gi|59894162	2.06604e+06	83.1	4.17	2	heat shock protein 90 [Guillardia theta]
gi|59894152	66490.7	83.1	4.15	2	heat shock protein 90 [Pavlova lutheri]
gi|116222149	66654	83.1	4.13	2	Hsp90 [Mesostigma viride]
gi|168830547	73677.1	83.1	4.04	3	cytosolic heat shock protein 90 [Andalucia godoyi]
gi|145506827	74028.8	83.1	3.73	2	hypothetical protein [Paramecium tetraurelia strain d4-2]_x0001_gi|124406558|emb|CAK71977.1| unnamed protein product [Paramecium tetraurelia]
gi|25986823	71704	83.1	3.86	2	heat shock protein 90 [Rhynchomonas nasuta]
gi|25986825	72692.7	83.1	3.79	2	heat shock protein 90 [Neobodo saliens]
gi|25986827	72719.6	83.1	3.79	2	heat shock protein 90 [Neobodo saliens]
gi|55824396	74095.4	83.1	3.74	2	heat shock protein 90 [Ichthyobodo necator]
gi|162605968	79247.8	83.1	3.51	2	heat shock protein 82 [Guillardia theta]_x0001_gi|6690601|gb|AAF24209.1|AF165818_2 heat shock protein 82 [Guillardia theta]
gi|67593512	80878	83.1	3.43	2	heat shock protein 83 [Cryptosporidium hominis TU502]_x0001_gi|54656542|gb|EAL35500.1| heat shock protein 83 [Cryptosporidium hominis]
gi|5257484	80951	83.1	3.43	2	hsp82 heat shock protein [Tetrahymena thermophila]
gi|9837418	80872.9	83.1	3.43	2	heat shock protein 90 [Tetrahymena pyriformis]
gi|164660058	79074.9	83.1	3.45	2	hypothetical protein MGL_1335 [Malassezia globosa CBS 7966]_x0001_gi|159105052|gb|EDP43938.1| hypothetical protein MGL_1335 [Malassezia globosa CBS 7966]
gi|56759038	82218.4	83.1	3.34	2	SJCHGC00820 protein [Schistosoma japonicum]
gi|6016262	81760.3	83.1	3.35	2	RecName: Full=Heat shock protein 83; AltName: Full=HSP 82_x0001_gi|2062377|gb|AAB58358.1| heat shock protein 83 [Drosophila auraria]
gi|194748769	81889.5	83.1	3.35	2	GF20110 [Drosophila ananassae]_x0001_gi|190624099|gb|EDV39623.1| GF20110 [Drosophila ananassae]
gi|125978877	81771.4	83.1	3.35	2	Hsp83 [Drosophila pseudoobscura pseudoobscura]_x0001_gi|115311643|sp|P04809.2|HSP83_DROPS RecName: Full=Heat shock protein 83; AltName: Full=HSP 82_x0001_gi|54642233|gb|EAL30982.1| Hsp83 [Drosophila pseudoobscura pseudoobscura]
gi|17647529	81865.5	83.1	3.35	2	heat shock protein 83 [Drosophila melanogaster]_x0001_gi|123661|sp|P02828.1|HSP83_DROME RecName: Full=Heat shock protein 83; AltName: Full=HSP 82_x0001_gi|8127|emb|CAA27435.1| hsp 82 [Drosophila melanogaster]_x0001_gi|7292327|gb|AAF47734.1| he
gi|195337077	81922.5	83.1	3.35	2	Hsp83 [Drosophila sechellia]_x0001_gi|195587401|ref|XP_002083453.1| heat shock protein 83 [Drosophila simulans]_x0001_gi|194128252|gb|EDW50295.1| Hsp83 [Drosophila sechellia]_x0001_gi|194195462|gb|EDX09038.1| heat shock protein 83 [Drosoph
gi|194866004	82048.7	83.1	3.34	2	GG15112 [Drosophila erecta]_x0001_gi|190653494|gb|EDV50737.1| GG15112 [Drosophila erecta]
gi|145502765	80517.9	83.1	3.43	2	hypothetical protein [Paramecium tetraurelia strain d4-2]_x0001_gi|124404510|emb|CAK69963.1| unnamed protein product [Paramecium tetraurelia]
gi|17559162	80283.3	83.1	3.42	2	abnormal DAuer Formation family member (daf-21) [Caenorhabditis elegans]_x0001_gi|74963152|sp|Q18688.1|HSP90_CAEEL RecName: Full=Heat shock protein 90; AltName: Full=Abnormal dauer formation protein 21_x0001_gi|3875041|emb|CAA99793.1| C.
gi|268559572	80848.8	83.1	3.4	2	C. briggsae CBR-DAF-21 protein [Caenorhabditis briggsae]_x0001_gi|74847037|sp|Q61W58.1|HSP90_CAEBR RecName: Full=Heat shock protein 90; AltName: Full=Abnormal dauer formation protein 21_x0001_gi|187035355|emb|CAP25236.1| C. briggsae
gi|118353019	81762.9	83.1	3.4	2	Hsp90 protein [Tetrahymena thermophila]_x0001_gi|89291547|gb|EAR89535.1| Hsp90 protein [Tetrahymena thermophila SB210]
gi|145476293	81463.1	83.1	3.39	2	hypothetical protein [Paramecium tetraurelia strain d4-2]_x0001_gi|124391232|emb|CAK56771.1| unnamed protein product [Paramecium tetraurelia]
gi|145523924	81698.2	83.1	3.38	2	hypothetical protein [Paramecium tetraurelia strain d4-2]_x0001_gi|124415317|emb|CAK80398.1| unnamed protein product [Paramecium tetraurelia]
gi|66359492	82353.8	83.1	3.38	2	Hsp90 [Cryptosporidium parvum Iowa II]_x0001_gi|46228347|gb|EAK89246.1| Hsp90 [Cryptosporidium parvum Iowa II]
gi|19908703	81698.9	83.1	3.38	2	Hsp90 [Crypthecodinium cohnii]
gi|42495729	82356.6	83.1	3.37	2	heat shock protein 90 [Eimeria acervulina]
gi|42525239	2.08215e+06	83.1	3.37	2	heat shock protein 90 [Eimeria acervulina]
gi|195014312	81482.1	83.1	3.37	2	GH16203 [Drosophila grimshawi]_x0001_gi|193897482|gb|EDV96348.1| GH16203 [Drosophila grimshawi]
gi|89892739	81578.2	83.1	3.36	2	heat shock protein 90 [Liriomyza sativae]
gi|89892737	81691.3	83.1	3.36	2	heat shock protein 90 [Liriomyza huidobrensis]
gi|76780421	81742.5	83.1	3.36	2	heat shock protein 83 [Ceratitis capitata]
gi|117499964	3.08151e+06	83.1	3.35	2	heat shock protein 83 [Drosophila buzzatii]
gi|195376387	81855.5	83.1	3.35	2	heat shock protein 83 [Drosophila virilis]_x0001_gi|194154136|gb|EDW69320.1| heat shock protein 83 [Drosophila virilis]
gi|195127443	81882.5	83.1	3.35	2	GI13350 [Drosophila mojavensis]_x0001_gi|193919787|gb|EDW18654.1| GI13350 [Drosophila mojavensis]
gi|195428529	82369.9	83.1	3.33	2	Hsp83 [Drosophila willistoni]_x0001_gi|194158410|gb|EDW73311.1| Hsp83 [Drosophila willistoni]
gi|22086553	80184.9	83.1	3.41	2	heat shock protein Hsp90 [Achlya ambisexualis]
gi|22086550	80170.9	83.1	3.41	2	heat shock protein Hsp90 [Achlya ambisexualis]
gi|51172594	80990.2	83.1	3.4	2	heat shock 90kD protein [Cyanidioschyzon merolae strain 10D]
gi|237837961	81933.2	83.1	3.39	2	heat shock protein 90 [Toxoplasma gondii ME49]_x0001_gi|31415498|gb|AAP44977.1| HSP90 [Toxoplasma gondii]_x0001_gi|33669480|gb|AAQ24837.1| heat shock protein 90 [Toxoplasma gondii]_x0001_gi|211965942|gb|EEB01138.1| heat shock protein 90 [T
gi|67462290	82243.7	83.1	3.38	2	heat shock protein 90 [Pseudourostyla cristata]
gi|6016264	82412.6	83.1	3.37	2	RecName: Full=Heat shock protein 90_x0001_gi|2792527|gb|AAB97088.1| heat shock protein 90 [Eimeria tenella]
gi|61656601	81901.8	83.1	3.35	2	Hsp90 protein [Delia antiqua]
gi|124511730	86166.4	83.1	3.22	2	heat shock protein 86 [Plasmodium falciparum 3D7]_x0001_gi|505338|gb|AAA66178.1| heat shock protein 86 [Plasmodium falciparum]_x0001_gi|2642495|gb|AAC47837.1| heat shock protein 86 [Plasmodium falciparum]_x0001_gi|23498766|emb|CAD50836.1|
gi|510182	86122.2	83.1	3.22	2	heat-shock protein [Plasmodium falciparum]
gi|505340	86424.6	83.1	3.21	2	heat shock protein 86 [Plasmodium falciparum]_x0001_gi|1093612|prf||2104278A heat shock protein 90
gi|156094830	86341.9	83.1	3.21	2	heat shock protein 86 [Plasmodium vivax SaI-1]_x0001_gi|148802325|gb|EDL43724.1| heat shock protein 86, putative [Plasmodium vivax]
gi|56684140	85122.8	83.1	3.26	2	heat shock protein 90-like protein [Monocercomonoides sp. PA203]
gi|1150850	11158.7	83	21.57	2	heat shock protein 90 [Xenopus laevis]
gi|113431902	18804.3	83	12.87	2	heat shock 90kDa protein [Salmo salar]
gi|73972958	20285.2	83	12.02	2	PREDICTED: similar to Heat shock protein HSP 90-beta (HSP 84) (Tumor specific transplantation 84 kDa antigen) (TSTA) isoform 2 [Canis familiaris]
gi|226442774	28626.2	83	8.63	2	Heat shock protein HSP 90-beta [Salmo salar]_x0001_gi|221220318|gb|ACM08820.1| Heat shock protein HSP 90-beta [Salmo salar]_x0001_gi|221222320|gb|ACM09821.1| Heat shock protein HSP 90-beta [Salmo salar]
gi|146198474	34488.5	83	7.26	2	Heat-shock protein 90 [Lepomis macrochirus]
gi|223029707	1.04286e+06	83	5.9	2	heat shock protein 90 [Glossomastix chrysoplasta]
gi|73972962	58068.7	83	4.37	2	PREDICTED: similar to heat shock protein HSP 90-beta isoform 4 [Canis familiaris]
gi|197632029	67059.2	83	3.82	2	heat shock protein 90kDa alpha (cytosolic) class B member 1 [Salmo salar]
gi|255719460	80613.4	83	3.12	2	KLTH0H02970p [Lachancea thermotolerans]_x0001_gi|238941976|emb|CAR30148.1| KLTH0H02970p [Lachancea thermotolerans]
gi|262111842	80362.9	83	3.12	2	heat shock protein 90 [Phytophthora infestans T30-4]
gi|74007237	34394.1	82	7.56	2	PREDICTED: similar to heat shock protein 1, beta [Canis familiaris]
gi|28193108	49358.2	82	5.33	2	unnamed protein product [Homo sapiens]
gi|12654329	64390.2	82	4.01	2	HSP90AA1 protein [Homo sapiens]
gi|74191133	65274.2	82	3.96	2	unnamed protein product [Mus musculus]
gi|126310111	66267.3	82	3.86	2	PREDICTED: similar to heat shock protein 84b [Monodelphis domestica]
gi|71030336	83667.9	82	3.05	2	heat shock protein 90 [Theileria parva strain Muguga]_x0001_gi|93141279|sp|P24724.2|HSP90_THEPA RecName: Full=Heat shock protein 90; Short=HSP90_x0001_gi|68351766|gb|EAN32527.1| heat shock protein 90 [Theileria parva]
gi|161875	83683.9	82	3.05	2	heat shock protein 90 [Theileria parva]_x0001_gi|1094711|prf||2106315A heat shock protein 90kD
gi|84995502	83825.1	82	3.05	2	heat shock protein 90 [Theileria annulata strain Ankara]_x0001_gi|74952218|sp|Q4UDU8.1|HSP90_THEAN RecName: Full=Heat shock protein 90; Short=HSP90_x0001_gi|65302634|emb|CAI74741.1| heat shock protein 90, putative [Theileria annulata]
gi|109467590	34903.9	81.9	6.62	2	PREDICTED: similar to Heat shock protein HSP 90-beta (HSP 84) [Rattus norvegicus]
gi|74354254	30067.5	81.8	7.49	2	HSP90AB1 protein [Bos taurus]
gi|110589651	75769.8	81.8	3.07	2	Hsp90 [Entosiphon sulcatum]
gi|255977231	80435.6	81.8	2.85	2	heat shock protein of Hsp90 [Chara braunii]
gi|88597032	69654.5	65.7	2.63	3	heat shock protein HtpG [Campylobacter jejuni subsp. jejuni 84-25]_x0001_gi|218562171|ref|YP_002343950.1| heat shock protein 90 [Campylobacter jejuni subsp. jejuni NCTC 11168]_x0001_gi|17865494|sp|Q9PHZ3.1|HTPG_CAMJE RecName: Full=Chap
gi|86151681	69653.5	65.7	2.63	3	heat shock protein HtpG [Campylobacter jejuni subsp. jejuni 260.94]_x0001_gi|85841310|gb|EAQ58558.1| heat shock protein HtpG [Campylobacter jejuni subsp. jejuni 260.94]
gi|86153257	69679.6	65.7	2.63	3	heat shock protein HtpG [Campylobacter jejuni subsp. jejuni HB93-13]_x0001_gi|85842983|gb|EAQ60194.1| heat shock protein HtpG [Campylobacter jejuni subsp. jejuni HB93-13]
gi|86148961	69626.4	65.7	2.63	3	heat shock protein HtpG [Campylobacter jejuni subsp. jejuni CF93-6]_x0001_gi|85840319|gb|EAQ57576.1| heat shock protein HtpG [Campylobacter jejuni subsp. jejuni CF93-6]
gi|121612114	69624.5	65.7	2.63	3	heat shock protein 90 [Campylobacter jejuni subsp. jejuni 81-176]_x0001_gi|167005176|ref|ZP_02270934.1| heat shock protein 90 [Campylobacter jejuni subsp. jejuni 81-176]_x0001_gi|166223021|sp|A1VYN0.1|HTPG_CAMJJ RecName: Full=Chapero
gi|57238279	69640.5	65.7	2.63	3	heat shock protein 90 [Campylobacter jejuni RM1221]_x0001_gi|81819551|sp|Q5HVP5.1|HTPG_CAMJR RecName: Full=Chaperone protein htpG; AltName: Full=Heat shock protein htpG; AltName: Full=High temperature protein G_x0001_gi|57167083|gb|AAW35
gi|153951602	69675.6	65.7	2.63	3	heat shock protein 90 [Campylobacter jejuni subsp. doylei 269.97]_x0001_gi|166223020|sp|A7H4M0.1|HTPG_CAMJD RecName: Full=Chaperone protein htpG; AltName: Full=Heat shock protein htpG; AltName: Full=High temperature protein G_x0001_g
gi|148925890	69693.6	65.7	2.63	3	hsp90 family heat shock protein [Campylobacter jejuni subsp. jejuni CG8486]_x0001_gi|145844876|gb|EDK21980.1| hsp90 family heat shock protein [Campylobacter jejuni subsp. jejuni CG8486]
gi|157414802	69681.6	65.7	2.63	3	heat shock protein 90 [Campylobacter jejuni subsp. jejuni 81116]_x0001_gi|172047083|sp|A8FKU4.1|HTPG_CAMJ8 RecName: Full=Chaperone protein htpG; AltName: Full=Heat shock protein htpG; AltName: Full=High temperature protein G_x0001_gi
gi|205355377	69596.5	65.7	2.63	3	hsp90 family heat shock protein [Campylobacter jejuni subsp. jejuni CG8421]_x0001_gi|205346611|gb|EDZ33243.1| hsp90 family heat shock protein [Campylobacter jejuni subsp. jejuni CG8421]
gi|220905459	74146.8	63.9	2.73	3	heat shock protein Hsp90 [Desulfovibrio desulfuricans subsp. desulfuricans str. ATCC 27774]_x0001_gi|219869758|gb|ACL50093.1| heat shock protein Hsp90 [Desulfovibrio desulfuricans subsp. desulfuricans str. ATCC 27774]
gi|32967459	67783.9	62.8	3.43	2	90-kDa heat-shock protein [Suberites fuscus]
gi|224056837	80026.2	62.5	2.43	2	predicted protein [Populus trichocarpa]_x0001_gi|222846306|gb|EEE83853.1| predicted protein [Populus trichocarpa]
gi|229892248	83383.6	62.5	2.49	2	heat shock protein 90 [Apis mellifera]_x0001_gi|226446415|gb|ACO58573.1| heat shock protein 90 [Apis mellifera]
gi|241957367	81281.9	61.9	2.95	2	ATP-dependent molecular chaperone, HSP90 family, putative; heat shock protein 82 homolog, putative [Candida dubliniensis CD36]_x0001_gi|223644747|emb|CAX40738.1| ATP-dependent molecular chaperone, HSP90 family, putative; heat s
gi|255731572	81437.1	61.9	2.95	2	ATP-dependent molecular chaperone HSC82 [Candida tropicalis MYA-3404]_x0001_gi|240131719|gb|EER31278.1| ATP-dependent molecular chaperone HSC82 [Candida tropicalis MYA-3404]
gi|86751790	68605.9	61.6	3.03	2	heat shock protein 90 [Rhodopseudomonas palustris HaA2]_x0001_gi|118575202|sp|Q2IQY5.1|HTPG_RHOP2 RecName: Full=Chaperone protein htpG; AltName: Full=Heat shock protein htpG; AltName: Full=High temperature protein G_x0001_gi|86574818|gb|
gi|226497844	83070.4	61.4	2.64	2	hypothetical protein LOC100279926 [Zea mays]_x0001_gi|219886735|gb|ACL53742.1| unknown [Zea mays]
gi|223029697	2.04213e+06	61.3	4.3	2	heat shock protein 90 [Pseudopedinella elastica]
gi|28780377	41692.2	59.8	3.61	1	heat shock protein 90 [Streblomastix strix]
gi|28781760	41708.2	59.8	3.61	1	heat shock protein 90 [Streblomastix strix]
gi|38885054	1065876	59.8	2.28	1	heat shock protein 90 [Oxyrrhis marina]
gi|196017789	58130.6	59.8	2.58	1	hypothetical protein TRIADDRAFT_62661 [Trichoplax adhaerens]_x0001_gi|190578565|gb|EDV18874.1| hypothetical protein TRIADDRAFT_62661 [Trichoplax adhaerens]
gi|116222153	62866.8	59.8	2.38	1	Hsp90 [Pterosperma cristatum]
gi|31982976	63609.4	59.8	2.36	1	heat shock protein 90 [Corallochytrium limacisporum]
gi|31982986	63402.4	59.8	2.36	1	heat shock protein 90 [Thaumatomonas sp. (SA)]
gi|31982980	63676.7	59.8	2.36	1	heat shock protein 90 [Ochromonas sp. Woods Hole]
gi|156229674	63980.7	59.8	2.35	1	heat shock protein 90 [Noctiluca scintillans]
gi|116222131	64301.9	59.8	2.34	1	Hsp90 [Chrysochromulina sp. NIES-1333]
gi|99643827	64659.5	59.8	2.33	1	heat shock protein 90 [Gymnodinium chlorophorum]
gi|99643833	64792.6	59.8	2.33	1	heat shock protein 90 [Karlodinium micrum]
gi|157107376	63778.7	59.8	2.32	1	heat shock protein [Aedes aegypti]_x0001_gi|108868693|gb|EAT32918.1| heat shock protein [Aedes aegypti]
gi|28779472	65395.5	59.8	2.3	1	heat shock protein 90 [Streblomastix strix]
gi|116222167	64682.4	59.8	2.3	1	Hsp90 [Synura sphagnicola]
gi|116740265	65324.1	59.8	2.28	1	heat shock protein 90 [Telonema subtile]
gi|32967465	66125.9	59.8	2.27	1	90-kDa heat-shock protein [Sycon sp. AR-2003]
gi|78190581	66760.9	59.8	2.27	1	heat shock 90 kDa protein [Platynereis dumerilii]
gi|78190625	66421.6	59.8	2.26	1	heat shock 90 kDa protein [Priapulus caudatus]
gi|38885067	2.0683e+06	59.8	2.19	1	heat shock protein 90 [Perkinsus marinus]
gi|146097489	72917.1	59.8	2.06	1	heat shock protein 83-1 [Leishmania infantum]_x0001_gi|134072485|emb|CAM71197.1| heat shock protein 83-1 [Leishmania infantum]
gi|25986837	73598.9	59.8	2.05	1	heat shock protein 90 [Bodo saltans]
gi|25986839	73941.2	59.8	2.04	1	heat shock protein 90 [Bodo cf. uncinatus]
gi|25986835	74433	59.8	2.03	1	heat shock protein 90 [Cryptobia helicis]
gi|25986829	74528.1	59.8	2.03	1	heat shock protein 90 [Trypanoplasma borreli]
gi|25986833	74490	59.8	2.03	1	heat shock protein 90 [Cryptobia helicis]
gi|25986831	74307.7	59.8	2.03	1	heat shock protein 90 [Cryptobia salmositica]
gi|37787287	83367.4	59.8	1.79	1	heat shock protein 90 beta [Paralichthys olivaceus]
gi|74271759	82472.4	59.8	1.81	1	heat shock protein 90 [Chilo suppressalis]
gi|193676526	79436.4	59.8	1.88	1	PREDICTED: similar to heat shock protein 90 isoform 4 [Acyrthosiphon pisum]
gi|193676524	80466.4	59.8	1.86	1	PREDICTED: similar to heat shock protein 90 isoform 2 [Acyrthosiphon pisum]
gi|71403337	80726.7	59.8	1.85	1	heat shock protein 85 [Trypanosoma cruzi strain CL Brener]_x0001_gi|70867473|gb|EAN82629.1| heat shock protein 85, putative [Trypanosoma cruzi]
gi|71421380	80741.6	59.8	1.85	1	heat shock protein 85 [Trypanosoma cruzi strain CL Brener]_x0001_gi|71652472|ref|XP_814892.1| heat shock protein 85 [Trypanosoma cruzi strain CL Brener]_x0001_gi|70876495|gb|EAN89940.1| heat shock protein 85, putative [Trypanosoma cruzi]
gi|123667	80757.6	59.8	1.85	1	RecName: Full=Heat shock-like 85 kDa protein_x0001_gi|162111|gb|AAA30202.1| 85 kDa protein [Trypanosoma cruzi]
gi|112253669	81568.6	59.8	1.83	1	heat shock protein 90 [Karlodinium micrum]
gi|193676522	81862.3	59.8	1.83	1	PREDICTED: similar to heat shock protein 90 isoform 3 [Acyrthosiphon pisum]
gi|156088295	82512.8	59.8	1.83	1	hsp90 protein [Babesia bovis]_x0001_gi|7381186|gb|AAF61428.1|AF136649_1 heat shock protein 90 [Babesia bovis]_x0001_gi|154798808|gb|EDO07986.1| hsp90 protein [Babesia bovis]
gi|145693236	82555.3	59.8	1.82	1	heat shock protein 90 [Omphisa fuscidentalis]
gi|159034064	82649.5	59.8	1.81	1	heat shock protein 90 [Loxostege sticticalis]
gi|193676520	83095.4	59.8	1.8	1	PREDICTED: similar to heat shock protein 90 isoform 1 [Acyrthosiphon pisum]
gi|193652748	83417.5	59.8	1.79	1	PREDICTED: similar to heat shock protein 90 [Acyrthosiphon pisum]
gi|4261762	7432.56	59.7	16.18	1	90-kda heat shock protein beta HSP90 beta [Homo sapiens]
gi|89114266	38189.7	59.7	3.29	1	heat shock protein 90 [Scophthalmus maximus]
gi|190359598	44349	59.7	2.89	1	RecName: Full=Putative heat shock protein HSP 90-beta 2; AltName: Full=Heat shock protein 90-beta b; Short=Heat shock protein 90Bb
gi|61104911	49122.7	59.7	2.61	1	heat shock protein 90Bb [Homo sapiens]
gi|186696228	60157.5	59.7	2.1	1	heat shock protein 90 [Phytophthora sp. ohioensis]
gi|256665408	82611	59.7	1.53	1	heat shock protein 90 [Babesia sp. BQ1/Lintan]
gi|5257482	6139	59.5	20.75	1	hsp82 heat shock protein [Tetrahymena thermophila]
gi|70938837	12370.1	59.5	10.09	1	hypothetical protein [Plasmodium chabaudi chabaudi]_x0001_gi|56517475|emb|CAH74810.1| hypothetical protein PC000354.00.0 [Plasmodium chabaudi chabaudi]
gi|42525251	18146.5	59.5	6.67	1	heat shock protein 90 [Eimeria acervulina]
gi|42525259	18144.5	59.5	6.67	1	heat shock protein 90 [Eimeria acervulina]
gi|42525277	18148.5	59.5	6.67	1	heat shock protein 90 [Eimeria acervulina]
gi|42525271	18163.5	59.5	6.67	1	heat shock protein 90 [Eimeria acervulina]_x0001_gi|42525273|gb|AAS18336.1| heat shock protein 90 [Eimeria acervulina]
gi|42525241	18176.5	59.5	6.67	1	heat shock protein 90 [Eimeria acervulina]_x0001_gi|42525243|gb|AAS18321.1| heat shock protein 90 [Eimeria acervulina]_x0001_gi|42525245|gb|AAS18322.1| heat shock protein 90 [Eimeria acervulina]_x0001_gi|42525247|gb|AAS18323.1| heat shock protei
gi|88192077	20934.9	59.5	5.91	1	Chain A, Hsp90 Delta24-N210 Mutant_x0001_gi|88192078|pdb|2AKP|B Chain B, Hsp90 Delta24-N210 Mutant
gi|157829955	24051.4	59.5	5.16	1	Chain A, Atp Binding Site In The Hsp90 Molecular Chaperone
gi|42543754	24182.6	59.5	5.14	1	Chain A, Complex Of Hsp90 And P50_x0001_gi|78101629|pdb|2BRC|A Chain A, Structure Of A Hsp90 Inhibitor Bound To The N-Terminus Of Yeast Hsp90._x0001_gi|119390310|pdb|2IWS|A Chain A, Radicicol Analogues Bound To The Atp Site Of Hsp90_x0001_gi|1193903
gi|78101630	24749.3	59.5	5.02	1	Chain A, Structure Of A Hsp90 Inhibitor Bound To The N-Terminus Of Yeast Hsp90._x0001_gi|78101631|pdb|2BRE|B Chain B, Structure Of A Hsp90 Inhibitor Bound To The N-Terminus Of Yeast Hsp90._x0001_gi|193506614|pdb|2VWC|A Chain A, Structure Of Th
gi|2624655	24846.5	59.5	5	1	Chain A, Structure Of The Orthorhombic Form Of The N-Terminal Domain Of The Yeast Hsp90 Chaperone_x0001_gi|2624656|pdb|1AH8|B Chain B, Structure Of The Orthorhombic Form Of The N-Terminal Domain Of The Yeast Hsp90 Chaperone_x0001_gi|157829876|p
gi|75858817	25266.5	59.5	4.91	1	heat shock protein 90 1 [Symbiodinium sp. C3]
gi|75858819	25238.5	59.5	4.91	1	heat shock protein 90 2 [Symbiodinium sp. C3]
gi|157830302	25494	59.5	4.89	1	Chain A, Radicicol Bound To The Atp Binding Site Of The N-Terminal Domain Of The Yeast Hsp90 Chaperone
gi|119389067	25466	59.5	4.89	1	Chain A, A Radicicol Analogue Bound To The Atp Binding Site Of The N- Terminal Domain Of The Yeast Hsp90 Chaperone
gi|157829682	26100.8	59.5	4.78	1	Chain A, Structure Of The N-Terminal Domain Of The Yeast Hsp90 Chaperone In Complex With Geldanamycin
gi|110590736	27009.8	59.5	4.58	1	Chain A, Yeast Hsp82 In Complex With The Novel Hsp90 Inhibitor 8-(6- Bromo-Benzo[1,3]dioxol-5-Ylsulfanyl)-9-(3-Isopropylamino- Propyl)-Adenine_x0001_gi|110590737|pdb|1ZWH|A Chain A, Yeast Hsp82 In Complex With The Novel Hsp90 Inhibitor
gi|194709140	26936.7	59.5	4.58	1	Chain A, Yeast Hsp82 N-Terminal Domain: Effects Of Mutants 98-99 Ks- Aa_x0001_gi|194709141|pdb|3C11|A Chain A, Yeast Hsp82 N-Terminal Domain-Geldanamycin Complex: Effects Of Mutants 98-99 Ks-Aa
gi|2826164	27381.7	59.5	4.51	1	heat shock protein 90 [Schistosoma japonicum]
gi|257215742	29302.7	59.5	4.23	1	heat shock protein 90kDa alpha [Schistosoma japonicum]_x0001_gi|257215918|emb|CAX83111.1| heat shock protein 90kDa alpha [Schistosoma japonicum]
gi|134037070	31898	59.5	3.97	1	heat shock protein 90 1 [Alexandrium fundyense]
gi|6018214	33963.9	59.5	3.72	1	82 kD heat shock protein [Seison nebaliae]
gi|157355669	34277.8	59.5	3.67	1	unnamed protein product [Vitis vinifera]
gi|223029691	1.04136e+06	59.5	3.03	1	heat shock protein 90 [Chlorellidium tetrabotrys]
gi|223029705	42025.5	59.5	3.01	1	heat shock protein 90 [Thraustochytrium aureum]
gi|223029703	42664.4	59.5	2.96	1	heat shock protein 90 [Mallomonas tonsurata]
gi|116222151	52631.7	59.5	2.41	1	Hsp90 [Mesostigma viride]
gi|84468292	55428.2	59.5	2.3	1	putative HEAT SHOCK PROTEIN 81-2 [Trifolium pratense]
gi|159794958	58089.1	59.5	2.17	1	Chain A, Structure Of N-Terminal Plus Middle Domains (N+m) Of Grp94_x0001_gi|159794959|pdb|2O1W|B Chain B, Structure Of N-Terminal Plus Middle Domains (N+m) Of Grp94_x0001_gi|159794960|pdb|2O1W|C Chain C, Structure Of N-Terminal Plus Middle D
gi|84105347	61713.4	59.5	2.05	1	cytosolic heat shock protein 90 [Malawimonas jakobiformis]
gi|116222175	63784.3	59.5	1.98	1	Hsp90 [Leucocryptos marina]
gi|116222173	63770.4	59.5	1.98	1	Hsp90 [Leucocryptos marina]
gi|81159226	65640.8	59.5	1.95	1	heat shock protein 90 [Proteomonas sulcata]
gi|118766784	66246.9	59.5	2.29	2	heat shock protein 90 [Oxymonadida environmental sample]
gi|118766764	66272.9	59.5	2.28	2	heat shock protein 90 [Oxymonadida environmental sample]
gi|52352108	66329.2	59.5	1.93	1	heat-shock protein 90 [Phalansterium solitarium]
gi|52352106	66561.3	59.5	1.92	1	heat-shock protein 90 [Phalansterium solitarium]
gi|116222133	66431	59.5	1.91	1	Hsp90 [Cyanophora paradoxa]
gi|116222141	66482.2	59.5	1.91	1	Hsp90 [Cyanophora paradoxa]
gi|116222134	66560.1	59.5	1.9	1	Hsp90 [Cyanophora paradoxa]
gi|116222140	66611.3	59.5	1.9	1	Hsp90 [Cyanophora paradoxa]
gi|116222139	66739.4	59.5	1.9	1	Hsp90 [Cyanophora paradoxa]
gi|116222135	66688.3	59.5	1.9	1	Hsp90 [Cyanophora paradoxa]
gi|116222136	66817.4	59.5	1.9	1	Hsp90 [Cyanophora paradoxa]
gi|116222138	66868.6	59.5	1.9	1	Hsp90 [Cyanophora paradoxa]
gi|116222145	67149.6	59.5	1.87	1	Hsp90 [Goniomonas truncata]
gi|116222143	67316.7	59.5	1.87	1	Hsp90 [Goniomonas truncata]
gi|198427715	69050.2	59.5	1.83	1	PREDICTED: similar to cytosolic heat shock protein 90 beta [Ciona intestinalis]
gi|222823709	70064	59.5	1.81	1	heat shock protein HtpG, chaperone Hsp90 [Campylobacter lari RM2100]_x0001_gi|222538931|gb|ACM64032.1| heat shock protein HtpG, chaperone Hsp90 [Campylobacter lari RM2100]
gi|57505861	70493.6	59.5	1.79	1	heat shock protein 90 [Campylobacter upsaliensis RM3195]_x0001_gi|57015891|gb|EAL52680.1| heat shock protein 90 [Campylobacter upsaliensis RM3195]
gi|90426400	68213.4	59.5	1.77	1	heat shock protein 90 [Rhodopseudomonas palustris BisB18]_x0001_gi|118575203|sp|Q20WN5.1|HTPG_RHOPB RecName: Full=Chaperone protein htpG; AltName: Full=Heat shock protein htpG; AltName: Full=High temperature protein G_x0001_gi|90108414|g
gi|91978860	68759.1	59.5	1.75	1	heat shock protein 90 [Rhodopseudomonas palustris BisB5]_x0001_gi|123735061|sp|Q12ZX1.1|HTPG_RHOPS RecName: Full=Chaperone protein htpG; AltName: Full=Heat shock protein htpG; AltName: Full=High temperature protein G_x0001_gi|91685316|gb
gi|55824398	73392.6	59.5	1.74	1	heat shock protein 90 [Rhynchobodo ATCC50359]
gi|25986841	73104.8	59.5	1.74	1	heat shock protein 90 [Naegleria gruberi]
gi|15639968	72937.8	59.5	1.72	1	heat shock protein 90 [Treponema pallidum subsp. pallidum str. Nichols]_x0001_gi|189026207|ref|YP_001933979.1| heat shock protein 90 [Treponema pallidum subsp. pallidum SS14]_x0001_gi|6016274|sp|O83949.1|HTPG_TREPA RecName: Full=Chaperon
gi|156151276	74762.6	59.5	1.69	1	heat shock protein 90 [Cyanophora paradoxa]
gi|156151274	75814.9	59.5	1.68	1	heat shock protein 90 [Physarum polycephalum]
gi|262198545	73927.7	59.5	1.67	1	Heat shock protein Hsp90-like protein [Haliangium ochraceum DSM 14365]_x0001_gi|262081892|gb|ACY17861.1| Heat shock protein Hsp90-like protein [Haliangium ochraceum DSM 14365]
gi|159794954	76480.1	59.5	1.65	1	Chain A, Structure Of Full Length Grp94 With Amp-Pnp Bound_x0001_gi|159794955|pdb|2O1U|B Chain B, Structure Of Full Length Grp94 With Amp-Pnp Bound_x0001_gi|159794956|pdb|2O1V|A Chain A, Structure Of Full Length Grp94 With Adp Bound_x0001_gi|159794
gi|195360676	78308.8	59.5	1.61	1	heat shock protein 90 [Amphidinium carterae]
gi|255931703	79535.9	59.5	1.58	1	Pc12g05640 [Penicillium chrysogenum Wisconsin 54-1255]_x0001_gi|211582027|emb|CAP80191.1| Pc12g05640 [Penicillium chrysogenum Wisconsin 54-1255]
gi|255582806	79954	59.5	1.58	1	heat shock protein, putative [Ricinus communis]_x0001_gi|223528145|gb|EEF30214.1| heat shock protein, putative [Ricinus communis]
gi|159459822	80202.3	59.5	1.57	1	heat shock protein 90 [Vitis pseudoreticulata]
gi|66828255	79865.6	59.5	1.57	1	heat shock protein Hsp90 family protein [Dictyostelium discoideum AX4]_x0001_gi|166203664|sp|P54651.2|HSC90_DICDI RecName: Full=Heat shock cognate 90 kDa protein_x0001_gi|60475217|gb|EAL73152.1| heat shock protein Hsp90 family protein [D
gi|899060	79881.6	59.5	1.57	1	heat shock cognate protein [Dictyostelium discoideum]
gi|4204859	80384.4	59.5	1.57	1	heat shock protein 80 [Triticum aestivum]
gi|169854065	79804.8	59.5	1.57	1	hypothetical protein CC1G_03927 [Coprinopsis cinerea okayama7#130]_x0001_gi|116505360|gb|EAU88255.1| hypothetical protein CC1G_03927 [Coprinopsis cinerea okayama7#130]
gi|208964722	80157.2	59.5	1.57	1	heat shock protein 90-2 [Glycine max]
gi|208964724	80465.5	59.5	1.57	1	heat shock protein 90-1 [Glycine max]
gi|209881925	81101.1	59.5	1.56	1	Hsp90 protein [Cryptosporidium muris RN66]_x0001_gi|209558006|gb|EEA08051.1| Hsp90 protein, putative [Cryptosporidium muris RN66]
gi|259148771	80857.8	59.5	1.56	1	Hsc82p [Saccharomyces cerevisiae EC1118]
gi|147789390	1.0807e+06	59.5	1.56	1	hypothetical protein [Vitis vinifera]
gi|225464589	80868.1	59.5	1.56	1	PREDICTED: hypothetical protein [Vitis vinifera]
gi|159474294	80681.6	59.5	1.56	1	heat shock protein 90A [Chlamydomonas reinhardtii]_x0001_gi|158276198|gb|EDP01972.1| heat shock protein 90A [Chlamydomonas reinhardtii]
gi|256084399	80698.8	59.5	1.56	1	heat shock protein [Schistosoma mansoni]_x0001_gi|238663789|emb|CAZ34655.1| heat shock protein, putative [Schistosoma mansoni]
gi|254566257	80900.8	59.5	1.56	1	Heat shock protein Hsp90 [Pichia pastoris GS115]_x0001_gi|238030035|emb|CAY67958.1| Heat shock protein Hsp90 [Pichia pastoris GS115]
gi|259149917	81420.4	59.5	1.55	1	Hsp82p [Saccharomyces cerevisiae EC1118]
gi|219130936	80549.4	59.5	1.55	1	predicted protein [Phaeodactylum tricornutum CCAP 1055/1]_x0001_gi|217402948|gb|EEC42906.1| predicted protein [Phaeodactylum tricornutum CCAP 1055/1]
gi|195431710	81702.3	59.5	1.54	1	GK15907 [Drosophila willistoni]_x0001_gi|194159956|gb|EDW74857.1| GK15907 [Drosophila willistoni]
gi|195491331	82054.6	59.5	1.53	1	GE21339 [Drosophila yakuba]_x0001_gi|194179618|gb|EDW93229.1| GE21339 [Drosophila yakuba]
gi|256084401	82302.7	59.5	1.53	1	heat shock protein [Schistosoma mansoni]_x0001_gi|238663790|emb|CAZ34656.1| heat shock protein, putative [Schistosoma mansoni]
gi|221115825	82728.1	59.5	1.52	1	PREDICTED: similar to heat shock protein 90, alpha (cytosolic), class A member 1 [Hydra magnipapillata]
gi|221131836	82611.8	59.5	1.52	1	PREDICTED: similar to heat shock protein 90kDa alpha (cytosolic), class A member 1 [Hydra magnipapillata]
gi|239881808	83327	59.5	1.52	1	heat shock protein 90, putative [Perkinsus marinus ATCC 50983]_x0001_gi|239884628|gb|EER08983.1| heat shock protein 90, putative [Perkinsus marinus ATCC 50983]
gi|239902635	83924.7	59.5	1.51	1	heat shock protein 90, putative [Perkinsus marinus ATCC 50983]
gi|47551251	92332.1	59.5	1.36	1	heat shock protein gp96 [Strongylocentrotus purpuratus]_x0001_gi|27803586|gb|AAO21341.1| heat shock protein gp96 [Strongylocentrotus purpuratus]
gi|119597948	36266.6	53	2.84	1	hCG1786469 [Homo sapiens]
gi|57117799	40057.1	53	2.68	1	heat shock protein 90 [Homarus americanus]
gi|74722492	68324.9	53	1.51	1	RecName: Full=Putative heat shock protein HSP 90-beta-3; AltName: Full=Heat shock protein 90-beta c; Short=Heat shock protein 90Bc_x0001_gi|61104913|gb|AAX38251.1| heat shock protein 90Bc [Homo sapiens]
gi|149525990	4.09028e+06	98.7	5.58	4	PREDICTED: similar to heat shock protein 84b, partial [Ornithorhynchus anatinus]
gi|89515102	81191	98.2	4.97	3	heat shock protein 90 [Bufo gargarizans]
gi|32967451	79914.5	86.5	4.45	3	90-kDa heat-shock protein [Monosiga brevicollis]
gi|167519765	81155.9	86.5	4.38	3	hypothetical protein [Monosiga brevicollis MX1]_x0001_gi|163777308|gb|EDQ90925.1| predicted protein [Monosiga brevicollis MX1]
gi|183178947	84552.8	86.5	4.21	3	82 kDa heat shock protein [Philodina roseola]
gi|183178959	84554.7	86.5	4.21	3	82 kDa heat shock protein [Philodina roseola]
gi|118766804	64976.8	83.1	4.63	3	heat shock protein 90 [Oxymonadida environmental sample]
gi|118766806	64855.6	83.1	4.29	2	heat shock protein 90 [Oxymonadida environmental sample]_x0001_gi|118766808|gb|ABL11341.1| heat shock protein 90 [Oxymonadida environmental sample]
gi|118766810	64865.8	83.1	4.29	2	heat shock protein 90 [Oxymonadida environmental sample]
gi|28779470	65564.9	83.1	4.26	2	heat shock protein 90 [Streblomastix strix]
gi|28779468	65683.9	83.1	4.25	2	heat shock protein 90 [Streblomastix strix]
gi|160331797	81173.4	83.1	3.44	2	hsp90 [Hemiselmis andersenii]_x0001_gi|159766054|gb|ABW98280.1| hsp90 [Hemiselmis andersenii]
gi|84105353	67134.9	59.5	1.89	1	cytosolic heat shock protein 90 [Trimastix marina]
gi|238843296	79984.3	59.5	1.56	1	ATP-dependent molecular chaperone HSC82 [Microsporum canis CBS 113480]
gi|149038677	70492.6	98.6	8.31	6	rCG22008, isoform CRA_c [Rattus norvegicus]
gi|21410145	75855.6	98.6	7.69	6	Ddx21 protein [Mus musculus]
gi|81295381	85965.8	98.6	6.78	6	DEAD (Asp-Glu-Ala-Asp) box polypeptide 21 [Rattus norvegicus]_x0001_gi|109510049|ref|XP_001053000.1| PREDICTED: DEAD (Asp-Glu-Ala-Asp) box polypeptide 21a [Rattus norvegicus]_x0001_gi|123780397|sp|Q3B8Q1.1|DDX21_RAT RecName: Full=Nucl
gi|7385089	88604.6	98.6	6.58	6	nucleolar RNA helicase II/Gu [Mus musculus]_x0001_gi|148700138|gb|EDL32085.1| DEAD (Asp-Glu-Ala-Asp) box polypeptide 21, isoform CRA_a [Mus musculus]
gi|26368308	91664.1	98.6	6.37	6	unnamed protein product [Mus musculus]
gi|13959325	93582.2	98.6	6.23	6	RecName: Full=Nucleolar RNA helicase 2; AltName: Full=Nucleolar RNA helicase II; AltName: Full=Nucleolar RNA helicase Gu; AltName: Full=RH II/Gu; AltName: Full=Gu-alpha; AltName: Full=DEAD box protein 21_x0001_gi|16975510|gb
gi|72384374	93551.2	98.6	6.23	6	DEAD (Asp-Glu-Ala-Asp) box polypeptide 21 [Mus musculus]_x0001_gi|74213643|dbj|BAE35625.1| unnamed protein product [Mus musculus]_x0001_gi|112180476|gb|AAH43655.1| DEAD (Asp-Glu-Ala-Asp) box polypeptide 21 [Mus musculus]_x0001_gi|148700139|gb|
gi|74211590	93595.2	98.6	6.23	6	unnamed protein product [Mus musculus]
gi|37748194	93532.2	98.6	6.23	6	DEAD (Asp-Glu-Ala-Asp) box polypeptide 21 [Mus musculus]
gi|74184925	64738.2	98.4	7.91	4	unnamed protein product [Mus musculus]_x0001_gi|74188907|dbj|BAE39226.1| unnamed protein product [Mus musculus]
gi|73989598	56261.8	98.4	9.11	4	PREDICTED: similar to heat shock protein 1, alpha isoform 1 [Canis familiaris]
gi|119602173	57733.2	98.4	8.87	4	heat shock protein 90kDa alpha (cytosolic), class A member 1, isoform CRA_b [Homo sapiens]
gi|74177708	64867.3	98.4	7.9	4	unnamed protein product [Mus musculus]_x0001_gi|74188809|dbj|BAE39185.1| unnamed protein product [Mus musculus]
gi|26345918	64849.2	98.4	7.9	4	unnamed protein product [Mus musculus]
gi|118142832	65893.6	98.4	7.79	4	Hsp90aa1 protein [Mus musculus]
gi|83318444	68371.6	98.4	7.52	4	HSP90AA1 protein [Homo sapiens]
gi|17865490	83098.1	98.4	6.12	4	RecName: Full=Heat shock protein HSP 90-alpha; AltName: Full=HSP 86_x0001_gi|12082136|dbj|BAB20777.1| heat shock protein 90 alpha [Equus caballus]
gi|126290220	84537.6	98.4	6.02	4	PREDICTED: similar to 90-kDa heat shock protein [Monodelphis domestica]
gi|126326088	84509.6	98.4	6.02	4	PREDICTED: similar to 90-kDa heat shock protein [Monodelphis domestica]
gi|32488	84673.7	98.4	6.01	4	unnamed protein product [Homo sapiens]
gi|154146191	84659.7	98.4	6.01	4	heat shock 90kDa protein 1, alpha isoform 2 [Homo sapiens]_x0001_gi|92090606|sp|P07900.5|HS90A_HUMAN RecName: Full=Heat shock protein HSP 90-alpha; AltName: Full=HSP 86; AltName: Full=Renal carcinoma antigen NY-REN-38_x0001_gi|703087|gb
gi|55730837	84559.5	98.4	6.01	4	hypothetical protein [Pongo abelii]
gi|47522774	84774.8	98.4	6	4	90-kDa heat shock protein [Sus scrofa]_x0001_gi|6016267|sp|O02705.3|HS90A_PIG RecName: Full=Heat shock protein HSP 90-alpha; AltName: Full=HSP 86_x0001_gi|1945447|gb|AAC48718.1| 90-kDa heat shock protein [Sus scrofa]
gi|6754254	84787.9	98.4	6	4	heat shock protein 1, alpha [Mus musculus]_x0001_gi|1170384|sp|P07901.4|HS90A_MOUSE RecName: Full=Heat shock protein HSP 90-alpha; AltName: Full=HSP 86; AltName: Full=Tumor-specific transplantation 86 kDa antigen; Short=TSTA_x0001_gi|3093
gi|60592792	84730.8	98.4	6	4	heat shock 90kD protein 1, alpha [Bos taurus]_x0001_gi|75072500|sp|Q76LV2.3|HS90A_BOVIN RecName: Full=Heat shock protein HSP 90-alpha_x0001_gi|34392343|dbj|BAC82487.1| 90-kDa heat shock protein alpha [Bos taurus]_x0001_gi|115503919|gb|ABI99
gi|74147335	84815.9	98.4	6	4	unnamed protein product [Mus musculus]
gi|28467005	84814.9	98.4	6	4	heat shock protein 90, alpha (cytosolic), class A member 1 [Rattus norvegicus]_x0001_gi|122065208|sp|P82995.3|HS90A_RAT RecName: Full=Heat shock protein HSP 90-alpha; AltName: Full=HSP 86_x0001_gi|14270366|emb|CAC39453.1| heat shock prot
gi|75075765	84788.8	98.4	6	4	RecName: Full=Heat shock protein HSP 90-alpha_x0001_gi|67971184|dbj|BAE01934.1| unnamed protein product [Macaca fascicularis]
gi|148727313	84772.8	98.4	6	4	heat shock 90kDa protein 1, alpha [Pan troglodytes]_x0001_gi|156630928|sp|A5A6K9.1|HS90A_PANTR RecName: Full=Heat shock protein HSP 90-alpha_x0001_gi|146741452|dbj|BAF62382.1| heat shock protein 90kDa alpha, class A member 1, transcr
gi|149636948	84866	98.4	6	4	PREDICTED: hypothetical protein [Ornithorhynchus anatinus]
gi|255653030	84769.8	98.4	6	4	heat shock protein 90kDa alpha (cytosolic), class A member 1 [Equus caballus]
gi|83699649	98143.1	98.4	5.15	4	heat shock 90kDa protein 1, alpha [Homo sapiens]_x0001_gi|119602174|gb|EAW81768.1| heat shock protein 90kDa alpha (cytosolic), class A member 1, isoform CRA_c [Homo sapiens]
gi|61656603	98113.1	98.4	5.15	4	Heat shock protein HSP 90-alpha 2 [Homo sapiens]_x0001_gi|193786428|dbj|BAG51711.1| unnamed protein product [Homo sapiens]
gi|153792590	98161.2	98.4	5.15	4	heat shock 90kDa protein 1, alpha isoform 1 [Homo sapiens]
gi|47219167	47476.1	97.4	8.5	3	unnamed protein product [Tetraodon nigroviridis]
gi|47219165	59504.7	97.4	6.69	3	unnamed protein product [Tetraodon nigroviridis]
gi|32967455	67003.1	97.4	6.07	3	90-kDa heat-shock protein [Halichondria sp. AR-2003]
gi|47224556	78736.2	97.4	5.12	3	unnamed protein product [Tetraodon nigroviridis]
gi|1170383	84849	97.4	4.77	3	RecName: Full=Heat shock protein HSP 90-alpha; AltName: Full=HSP 86_x0001_gi|495759|gb|AAA36992.1| heat shock protein 90A [Cricetulus griseus]
gi|110226522	84555.5	97.4	4.78	3	heat shock protein 90 alpha [Paralichthys olivaceus]
gi|62858821	84267.4	97.4	4.8	3	heat shock protein 90kDa alpha (cytosolic), class A member 1, gene 1 [Xenopus (Silurana) tropicalis]
gi|147900510	84192.3	97.4	4.8	3	MGC82579 protein [Xenopus laevis]_x0001_gi|49118048|gb|AAH72998.1| MGC82579 protein [Xenopus laevis]
gi|109835176	83318.6	97.4	4.83	3	RecName: Full=Heat shock protein HSP 90-alpha 1_x0001_gi|56207785|emb|CAI21043.1| heat shock protein 90-alpha [Danio rerio]
gi|18858873	83561.8	97.4	4.82	3	heat shock protein 90-alpha 1 [Danio rerio]_x0001_gi|3212011|gb|AAC21567.1| heat shock protein hsp90alpha [Danio rerio]
gi|30313869	83164.6	97.4	4.84	3	heat shock protein 90 alpha [Astyanax mexicanus]
gi|159576740	83423.9	97.4	4.83	3	cytosolic heat shock protein 90 alpha [Solea senegalensis]
gi|49899168	83366.7	97.4	4.83	3	Hsp90a.1 protein [Danio rerio]
gi|1899173	83505.6	97.4	4.82	3	heat shock protein hsp90 [Oncorhynchus tshawytscha]
gi|157954047	84059.2	97.2	4.53	3	heat shock 90kDa protein 1, alpha [Gallus gallus]_x0001_gi|123668|sp|P11501.3|HS90A_CHICK RecName: Full=Heat shock protein HSP 90-alpha_x0001_gi|63516|emb|CAA30251.1| unnamed protein product [Gallus gallus]
gi|161408085	84077.3	97.2	4.53	3	heat shock protein 90a [Alligator mississippiensis]
gi|220938628	22386.1	97.2	15.42	3	heat shock protein 90kDa alpha (cytosolic), class A member 1 [Mus musculus]
gi|193506505	23122.3	97.2	14.98	3	Chain A, Hsp90 Complexed With A56322_x0001_gi|193506506|pdb|2QF6|B Chain B, Hsp90 Complexed With A56322_x0001_gi|193506507|pdb|2QF6|C Chain C, Hsp90 Complexed With A56322_x0001_gi|193506508|pdb|2QF6|D Chain D, Hsp90 Complexed With A56322_x0001_gi|1935065
gi|193506509	23108.3	97.2	14.98	3	Chain A, Hsp90 Complexed With A143571 And A516383_x0001_gi|193506510|pdb|2QFO|B Chain B, Hsp90 Complexed With A143571 And A516383_x0001_gi|193506533|pdb|2QG0|A Chain A, Hsp90 Complexed With A943037_x0001_gi|193506534|pdb|2QG0|B Chain B, Hsp90 Compl
gi|217035225	23509.6	97.2	14.76	3	Chain A, Human Cdc37-Hsp90 Docking Model Based On Nmr
gi|31615893	24096.3	97.2	14.42	3	Chain A, Human Hsp90 In Complex With 17-Desmethoxy-17-N,N- Dimethylaminoethylamino-Geldanamycin
gi|194319906	24379.6	97.2	14.22	3	Chain A, Hsp90 Alpha Atpase Domain With Bound Small Molecule Fragment
gi|254221081	25169.4	97.2	13.84	3	Chain A, Human Heat-Shock Protein 90 (Hsp90) In Complex With {4-[3- (2,4-Dihydroxy-5-Isopropyl-Phenyl)-5-Thioxo- 1,5-Dihydro- [1,2,4]triazol-4-Yl]-Benzyl}-Carbamic Acid Ethyl Ester {zk 2819}_x0001_gi|254221082|pdb|3HHU|B Chain B, Human
gi|193885289	25383.6	97.2	13.72	3	Chain A, Discovery Of Benzisoxazoles As Potent Inhibitors Of Chaperone Hsp90_x0001_gi|193885290|pdb|3BMY|A Chain A, Discovery Of Benzisoxazoles As Potent Inhibitors Of Chaperone Hsp90
gi|215261294	25549.9	97.2	13.72	3	Chain A, Dihydroxylphenyl Amides As Inhibitors Of The Hsp90 Molecular Chaperone_x0001_gi|215261295|pdb|3EKO|B Chain B, Dihydroxylphenyl Amides As Inhibitors Of The Hsp90 Molecular Chaperone_x0001_gi|215261296|pdb|3EKR|A Chain A, Dihydroxylphe
gi|3891633	25641.8	97.2	13.6	3	Chain A, Hsp90 N-Terminal Domain Bound To Adp-Mg_x0001_gi|157834301|pdb|1YER|A Chain A, Human Hsp90 Geldanamycin-Binding Domain, "closed" Conformation_x0001_gi|157834302|pdb|1YES|A Chain A, Human Hsp90 Geldanamycin-Binding Domain, "open" Confor
gi|190613717	26128.4	97.2	13.36	3	Chain A, Crystal Structure Of Benzamide Tetrahydro-4h-Carbazol-4-One Bound To Hsp90
gi|71042757	26441.6	97.2	13.19	3	Chain A, Novel, Potent Small Molecule Inhibitors Of The Molecular Chaperone Hsp90 Discovered Through Structure-Based Design_x0001_gi|71042759|pdb|2BT0|A Chain A, Novel, Potent Small Molecule Inhibitors Of The Molecular Chaperone Hsp90 Di
gi|50513852	26572.8	97.2	13.14	3	Chain A, Human Hsp90-Alpha With 9-Butyl-8-(3,4,5-Trimethoxy-Benzyl)- 9h-Purin-6-Ylamine_x0001_gi|50513853|pdb|1UY7|A Chain A, Human Hsp90-Alpha With 9-Butyl-8-(4-Methoxy-Benzyl)-9h- Purin-6-Ylamine_x0001_gi|50513854|pdb|1UY8|A Chain A, Human H
gi|58177659	26580.8	97.2	13.14	3	Chain A, Human Hsp90-Alpha With 8-(2,5-Dimethoxy-Benzyl)-2-Fluoro-9- Pent-9h-Purin-6-Ylamine
gi|90109104	26586.8	97.2	13.14	3	Chain A, Human Hsp90 With 4-Chloro-6-(4-Piperazin-1-Yl-1h-Pyrazol-3- Yl)-Benzene-1,2-Diol_x0001_gi|90109105|pdb|2CCT|A Chain A, Human Hsp90 With 5-(5-Chloro-2,4-Dihydroxy-Phenyl)-4- Piperazin-1-Yl-2h-Pyrazole-3-Carboxylic Acid Ethylamide
gi|229597855	27922.3	97.2	12.45	3	Chain A, Structure Of Hsp90 Bound With A Novel Fragment_x0001_gi|242556486|pdb|3FT8|A Chain A, Structure Of Hsp90 Bound With A Noval Fragment
gi|74354119	28329.8	97.2	12.4	3	HSPCA protein [Bos taurus]
gi|154757499	28315.7	97.2	12.4	3	HSPCA protein [Bos taurus]
gi|116667188	28736.1	97.2	12.11	3	Chain A, Structure Of Human Hsp90-Alpha Bound To The Potent Water Soluble Inhibitor Pu-H64_x0001_gi|116667189|pdb|2FWZ|A Chain A, Structure Of Human Hsp90-Alpha Bound To The Potent Water Soluble Inhibitor Pu-H71_x0001_gi|116667585|pdb|2H55|A
gi|61680583	29771.3	97.2	11.74	3	Chain A, Crystal Structures Of Human Hsp90alpha Complexed With Dihydroxyphenylpyrazoles_x0001_gi|61680584|pdb|1YC3|A Chain A, Crystal Structure Of Human Hsp90alpha Complexed With Dihydroxyphenylpyrazoles_x0001_gi|61680585|pdb|1YC4|A Chain A, C
gi|26354102	31054.3	97.2	11.31	3	unnamed protein product [Mus musculus]
gi|32486	35760.7	97.2	9.94	3	unnamed protein product [Homo sapiens]_x0001_gi|184419|gb|AAA36023.1| heat shock protein 86 [Homo sapiens]
gi|194033	1.03978e+06	97.2	8.93	3	heat-shock protein hsp86 [Mus musculus]
gi|73989600	59023.5	97.2	6.09	3	PREDICTED: similar to Heat shock protein HSP 90-alpha (HSP 86) isoform 2 [Canis familiaris]
gi|73989602	62156.5	97.2	5.71	3	PREDICTED: similar to Heat shock protein HSP 90-alpha (HSP 86) isoform 3 [Canis familiaris]
gi|126571549	8.707	97.2	4.29	3	heat shock protein 90 alpha [Ovis aries]
gi|241830514	84278.6	97.2	4.24	3	Hsp90 protein, putative [Ixodes scapularis]_x0001_gi|215509020|gb|EEC18473.1| Hsp90 protein, putative [Ixodes scapularis]
gi|261888617	84799.8	97.2	4.23	3	HSP90alpha [Microtus fortis]
gi|156537033	1.707	84.1	4.78	3	PREDICTED: similar to mCG14932 [Nasonia vitripennis]
gi|37594780	83121.1	84.1	4.32	3	Hsp90 [Opistophthalmus carinatus]
gi|93278396	82566.5	84.1	4.32	3	heat shock protein 90 [Locusta migratoria]
gi|70997651	83031.4	84.1	4.31	3	90 kDa heat shock protein [Bemisia tabaci]
gi|70997669	83001.5	84.1	4.31	3	90 kDa heat shock protein [Bemisia tabaci]
gi|194580033	83447.9	84.1	4.02	3	heat shock protein 90 [Tetranychus cinnabarinus]
gi|121485025	83301.2	80.5	3.75	3	Hsp90 [Penaeus monodon]
gi|226838232	83553.5	80.5	3.75	3	heat shock protein 90 [Penaeus monodon]
gi|167843235	82450.4	80.5	3.74	3	heat shock protein 90 [Tigriopus japonicus]
gi|124245112	84114.2	80.5	3.72	3	heat shock protein 90 [Fenneropenaeus chinensis]
gi|115726886	57680.2	80.1	4.88	2	PREDICTED: similar to heat shock 90 kDa protein, partial [Strongylocentrotus purpuratus]_x0001_gi|115891388|ref|XP_783030.2| PREDICTED: similar to heat shock 90 kDa protein, partial [Strongylocentrotus purpuratus]
gi|116222155	62932.9	80.1	4.4	2	Hsp90 [Pterosperma cristatum]
gi|116222127	64261.9	80.1	4.32	2	Hsp90 [Chrysochromulina sp. NIES-1333]
gi|116222129	64150.7	80.1	4.32	2	Hsp90 [Chrysochromulina sp. NIES-1333]
gi|116740269	64026.6	80.1	4.31	2	heat shock protein 90 [Telonema antarcticum]
gi|38884999	64691.7	80.1	4.25	2	heat shock protein 90 [Spumella uniguttata]
gi|59894150	65549.5	80.1	4.22	2	heat shock protein 90 [Mallomonas rasilis]
gi|59894166	65975.1	80.1	4.21	2	heat shock protein 90 [Prymnesium parvum]
gi|32967463	66191.9	80.1	4.2	2	90-kDa heat-shock protein [Leucosolenia sp.]
gi|116222161	65914.3	80.1	4.2	2	Hsp90 [Pterosperma cristatum]
gi|116222163	65914.2	80.1	4.2	2	Hsp90 [Pterosperma cristatum]
gi|32967469	66236.4	80.1	4.18	2	90-kDa heat-shock protein [Nematostella vectensis]
gi|159147877	69761.9	80.1	3.95	2	heat shock protein 90 [Raphidiophrys contractilis]
gi|32967467	71379.4	80.1	3.88	2	90-kDa heat-shock protein [Aphrocallistes vastus]
gi|25986821	71746	80.1	3.85	2	heat shock protein 90 [Dimastigella trypaniformis]
gi|190402564	83389.5	80.1	3.31	2	HSP90 [Macrocentrus cingulum]_x0001_gi|193795158|gb|ACE77781.2| heat shock protein 90 [Macrocentrus cingulum]
gi|168054044	79773.8	80.1	3.44	2	predicted protein [Physcomitrella patens subsp. patens]_x0001_gi|162669128|gb|EDQ55721.1| predicted protein [Physcomitrella patens subsp. patens]
gi|170594031	80857.8	80.1	3.43	2	heat shock protein 90 [Brugia malayi]_x0001_gi|158590711|gb|EDP29326.1| heat shock protein 90, putative [Brugia malayi]
gi|168027421	80456.2	80.1	3.42	2	predicted protein [Physcomitrella patens subsp. patens]_x0001_gi|162682442|gb|EDQ68860.1| predicted protein [Physcomitrella patens subsp. patens]
gi|168057963	80741.8	80.1	3.41	2	predicted protein [Physcomitrella patens subsp. patens]_x0001_gi|162667615|gb|EDQ54241.1| predicted protein [Physcomitrella patens subsp. patens]
gi|168049930	80858.8	80.1	3.41	2	predicted protein [Physcomitrella patens subsp. patens]_x0001_gi|162671263|gb|EDQ57818.1| predicted protein [Physcomitrella patens subsp. patens]
gi|168049868	81212.3	80.1	3.39	2	predicted protein [Physcomitrella patens subsp. patens]_x0001_gi|162671232|gb|EDQ57787.1| predicted protein [Physcomitrella patens subsp. patens]
gi|164422267	80892.3	80.1	3.36	2	Hsp90 [Mythimna separata]
gi|157107378	81534.4	80.1	3.36	2	heat shock protein [Aedes aegypti]_x0001_gi|157130209|ref|XP_001655642.1| heat shock protein [Aedes aegypti]_x0001_gi|108868694|gb|EAT32919.1| heat shock protein [Aedes aegypti]_x0001_gi|108871962|gb|EAT36187.1| heat shock protein [Aedes a
gi|157130207	81470.3	80.1	3.36	2	heat shock protein [Aedes aegypti]_x0001_gi|108871961|gb|EAT36186.1| heat shock protein [Aedes aegypti]
gi|124028607	82291.2	80.1	3.36	2	heat shock protein 90 [Dendrolimus tabulaeformis]
gi|124028609	82337.3	80.1	3.36	2	heat shock protein 90 [Dendrolimus superans]
gi|124365189	82161.1	80.1	3.36	2	heat shock protein 90 [Dendrolimus punctatus x Dendrolimus tabulaeformis]
gi|124365193	82333.2	80.1	3.36	2	heat shock protein 90 [Dendrolimus tabulaeformis x Dendrolimus punctatus]
gi|156544504	82093.1	80.1	3.36	2	PREDICTED: similar to heat shock protein 90 [Nasonia vitripennis]
gi|112983556	82422.3	80.1	3.35	2	90-kDa heat shock protein [Bombyx mori]_x0001_gi|13699184|dbj|BAB41209.1| 90-kDa heat shock protein [Bombyx mori]
gi|170051791	81647.5	80.1	3.35	2	heat shock protein 83 [Culex quinquefasciatus]_x0001_gi|167872882|gb|EDS36265.1| heat shock protein 83 [Culex quinquefasciatus]
gi|170051795	81648.5	80.1	3.35	2	heat shock protein 83 [Culex quinquefasciatus]_x0001_gi|167872884|gb|EDS36267.1| heat shock protein 83 [Culex quinquefasciatus]
gi|19855062	82604.8	80.1	3.35	2	RecName: Full=Heat shock protein 90_x0001_gi|3256076|emb|CAA06695.1| heat shock protein 90 [Brugia pahangi]
gi|82941220	82385.3	80.1	3.35	2	heat shock protein 90 [Plutella xylostella]
gi|12005809	82573.5	80.1	3.35	2	90-kDa heat shock protein HSP83 [Spodoptera frugiperda]
gi|3096951	82576.7	80.1	3.35	2	heat shock protein 90 [Brugia pahangi]
gi|113208383	82506.3	80.1	3.35	2	heat shock protein 90 [Mamestra brassicae]
gi|166014096	82607.5	80.1	3.35	2	90 kDa heat shock protein 83 [Sesamia nonagrioides]
gi|110749824	82753.6	80.1	3.34	2	PREDICTED: similar to heat shock protein 1, alpha [Apis mellifera]
gi|170059721	82035.1	80.1	3.34	2	heat shock protein 83 [Culex quinquefasciatus]_x0001_gi|167878373|gb|EDS41756.1| heat shock protein 83 [Culex quinquefasciatus]
gi|118778689	82087.1	80.1	3.33	2	AGAP006958-PA [Anopheles gambiae str. PEST]_x0001_gi|150421573|sp|Q7PT10.3|HSP83_ANOGA RecName: Full=Heat shock protein 83_x0001_gi|116132505|gb|EAA04712.4| AGAP006958-PA [Anopheles gambiae str. PEST]
gi|1066807	82154.2	80.1	3.33	2	heat shock protein 82 [Anopheles albimanus]_x0001_gi|1066808|gb|AAB05639.1| heat shock protein 82 [Anopheles albimanus]
gi|40956306	82957.1	80.1	3.33	2	Hsp90 [Heterodera glycines]
gi|154759261	82704.7	80.1	3.33	2	heat shock protein 90 [Tribolium castaneum]_x0001_gi|149900519|gb|ABR32189.1| heat shock protein 90 [Tribolium castaneum]
gi|270007865	82593.4	80.1	3.33	2	hypothetical protein TcasGA2_TC014606 [Tribolium castaneum]
gi|156405338	83335.3	80.1	3.3	2	predicted protein [Nematostella vectensis]_x0001_gi|156227824|gb|EDO48626.1| predicted protein [Nematostella vectensis]
gi|14041148	84319	80.1	3.55	3	heat shock protein 90 [Dendronephthya klunzingeri]
gi|109689148	84015	80.1	3.3	2	84kDa heat shock protein [Haliotis tuberculata]
gi|148887775	84012	80.1	3.3	2	Hsp90A [Haliotis asinina]
gi|54873684	10836.4	80	22	2	Hsp90alpha [Xenopus laevis]
gi|555573	11044.6	80	21.78	2	heat shock protein 90 [Danio rerio]
gi|37696948	18270.8	80	13.41	2	Hsp90-like protein [Sphoeroides annulatus]
gi|51012384	18059.3	80	13.41	2	heat shock protein 86 [Rattus norvegicus]
gi|194390310	20249.6	80	12.02	2	unnamed protein product [Homo sapiens]
gi|196476686	2.02452e+06	80	10	2	heat shock protein 90 [Amblyomma americanum]
gi|28375499	29031	80	8.4	2	unnamed protein product [Homo sapiens]
gi|169642310	31015.7	80	8.06	2	Unknown (protein for IMAGE:7558608) [Xenopus tropicalis]
gi|292162	35673.7	80	7.05	2	heat shock protein 86 [Homo sapiens]
gi|172046850	39364.8	80	6.41	2	RecName: Full=Putative heat shock protein HSP 90-alpha A2; AltName: Full=Heat shock 90 kDa protein 1 alpha-like 3
gi|223029695	43170.1	80	5.87	2	heat shock protein 90 [Nannochloropsis gaditana]
gi|197246523	81401.4	80	3.13	2	Hsp90aa1.1 protein [Xenopus tropicalis]
gi|223648454	84639.7	80	3	2	Heat shock protein HSP 90-alpha [Salmo salar]
gi|42556386	82507.2	75.8	2.79	2	hsp-90 [Chiromantes haematocheir]
gi|209962093	82847.5	75.8	2.79	2	90 kDa heat shock protein [Eriocheir sinensis]
gi|226429772	82960.1	75.8	2.77	2	heat shock protein 90 [Ascaris suum]
gi|226429774	83273.4	75.8	2.77	2	heat shock protein 90 [Toxocara cati]
gi|224051739	83992.1	75.8	2.75	2	PREDICTED: similar to heat shock protein 90a [Taeniopygia guttata]
gi|257357665	84089.3	75.8	2.75	2	heat shock protein 90kDa alpha (cytosolic), class A member 1 [Coturnix japonica]
gi|257357673	84087.3	75.8	2.75	2	heat shock protein 90kDa alpha (cytosolic), class A member 1 [Coturnix japonica]
gi|25990446	79295.9	52.3	3.15	2	heat-shock protein 90 [Cryptococcus bacillisporus]
gi|225462013	80848.9	46.3	2.98	2	PREDICTED: similar to heat shock protein 90 [Vitis vinifera]
gi|223585702	82149.4	46	2.52	2	90 kDa heat shock protein [Dugesia japonica]
gi|198250392	83020.6	46	2.5	2	heat shock protein 90 [Bemisia tabaci]
gi|205362524	83125.1	46	2.49	2	heat shock protein 90 [Mytilus galloprovincialis]_x0001_gi|205362632|emb|CAE52893.2| heat shock protein 90 [Mytilus galloprovincialis]
gi|198250400	83013.3	46	2.49	2	heat shock protein 90 [Trialeurodes vaporariorum]_x0001_gi|215513568|gb|ACJ68446.1| 90 kDa heat shock protein [Trialeurodes vaporariorum]
gi|260836437	83452.4	46	2.48	2	hypothetical protein BRAFLDRAFT_278055 [Branchiostoma floridae]_x0001_gi|229298597|gb|EEN69221.1| hypothetical protein BRAFLDRAFT_278055 [Branchiostoma floridae]
gi|242023859	83441.9	46	2.48	2	Hsp90 protein, putative [Pediculus humanus corporis]_x0001_gi|212517771|gb|EEB19610.1| Hsp90 protein, putative [Pediculus humanus corporis]
gi|260836995	84005.8	46	2.46	2	hypothetical protein BRAFLDRAFT_119839 [Branchiostoma floridae]_x0001_gi|229298876|gb|EEN69500.1| hypothetical protein BRAFLDRAFT_119839 [Branchiostoma floridae]
gi|295722	9747.97	42.8	12.94	1	heat shock protein 90 [Gallus gallus]
gi|223029693	1.04263e+06	42.8	2.96	1	heat shock protein 90 [Pinguiococcus pyrenoidosus]
gi|223029701	44744	42.8	2.84	1	heat shock protein 90 [Nerada mexicana]
gi|260656819	57976	42.8	2.17	1	heat shock protein 90 [Roombia truncata]
gi|15215642	60845.3	42.8	2.09	1	AT5g56010/MDA7_5 [Arabidopsis thaliana]
gi|59894144	65877.6	42.8	1.91	1	heat shock protein 90 [Heterosigma akashiwo]
gi|33694248	73898.2	42.8	1.72	1	heat shock protein 90 [Euglena gracilis]
gi|33694246	73916.3	42.8	1.72	1	heat shock protein 90 [Euglena gracilis]
gi|25986817	74395.6	42.8	1.71	1	heat shock protein 90 [Rhynchopus sp. ATCC 50230]
gi|25986819	75270.6	42.8	1.69	1	heat shock protein 90 [Diplonema papillatum]
gi|110589649	76874.4	42.8	1.65	1	Hsp90 [Petalomonas cantuscygni]
gi|25990448	78272.7	42.8	1.59	1	heat-shock protein 90 [Cryptococcus neoformans var. grubii]
gi|161899185	80729.9	42.8	1.58	1	chaperone HSP90 [Bigelowiella natans]_x0001_gi|75756312|gb|ABA27207.1| chaperone HSP90 [Bigelowiella natans]
gi|161702923	79838.7	42.8	1.58	1	heat shock protein 90 [Ageratina adenophora]
gi|225903795	80090.1	42.8	1.58	1	heat shock protein 90 [Zea mays]
gi|224124846	79954.9	42.8	1.58	1	predicted protein [Populus trichocarpa]_x0001_gi|222871985|gb|EEF09116.1| predicted protein [Populus trichocarpa]
gi|242080071	80222.3	42.8	1.58	1	hypothetical protein SORBIDRAFT_07g028270 [Sorghum bicolor]_x0001_gi|241941154|gb|EES14299.1| hypothetical protein SORBIDRAFT_07g028270 [Sorghum bicolor]
gi|15241115	80064.1	42.8	1.57	1	HSP81-2 (HEAT SHOCK PROTEIN 81-2); ATP binding [Arabidopsis thaliana]_x0001_gi|2495365|sp|P55737.1|HSP82_ARATH RecName: Full=Heat shock protein 81-2; Short=HSP81-2_x0001_gi|9758623|dbj|BAB09285.1| HEAT SHOCK PROTEIN 81-2 (HSP81-2) [Arabi
gi|15241102	80141.2	42.8	1.57	1	heat shock protein 81-4 (HSP81-4) [Arabidopsis thaliana]_x0001_gi|1906828|emb|CAA72514.1| heat shock protein [Arabidopsis thaliana]_x0001_gi|9758620|dbj|BAB09282.1| heat shock protein [Arabidopsis thaliana]_x0001_gi|110742760|dbj|BAE99287.1| h
gi|158513648	80194.1	42.8	1.57	1	RecName: Full=Heat shock protein 81-1; Short=HSP81-1; AltName: Full=Heat shock protein 82_x0001_gi|158564094|sp|Q0J4P2.2|HSP81_ORYSJ RecName: Full=Heat shock protein 81-1; Short=HSP81-1; AltName: Full=Heat shock protein 82_x0001_
gi|15241113	80052.2	42.8	1.57	1	HSP81-3; ATP binding / unfolded protein binding [Arabidopsis thaliana]_x0001_gi|26454636|sp|P51818.2|HSP83_ARATH RecName: Full=Heat shock protein 81-3; Short=HSP81-3; AltName: Full=HSP81.2_x0001_gi|9758621|dbj|BAB09283.1| heat shock prot
gi|1906826	79993.2	42.8	1.57	1	heat shock protein [Arabidopsis thaliana]
gi|547683	80136.1	42.8	1.57	1	RecName: Full=Heat shock cognate protein 80_x0001_gi|170456|gb|AAB01376.1| heat shock cognate protein 80 [Solanum lycopersicum]_x0001_gi|38154493|gb|AAR12196.1| molecular chaperone Hsp90-2 [Solanum lycopersicum]_x0001_gi|445601|prf||19093
gi|39104468	80214.1	42.8	1.57	1	heat shock protein 90 [Oryza sativa Japonica Group]_x0001_gi|125564142|gb|EAZ09522.1| hypothetical protein OsI_31797 [Oryza sativa Indica Group]
gi|115479813	80200.1	42.8	1.57	1	Os09g0482100 [Oryza sativa (japonica cultivar-group)]_x0001_gi|75322934|sp|Q69QQ6.1|HSP82_ORYSJ RecName: Full=Heat shock protein 81-2; Short=HSP81-2; AltName: Full=Heat shock protein 90_x0001_gi|50725877|dbj|BAD33406.1| putative heat
gi|115479819	80184.1	42.8	1.57	1	Os09g0482400 [Oryza sativa (japonica cultivar-group)]_x0001_gi|94730392|sp|Q07078.2|HSP83_ORYSJ RecName: Full=Heat shock protein 81-3; Short=HSP81-3; AltName: Full=Gravity-specific protein GSC 381_x0001_gi|50725880|dbj|BAD33409.1| pu
gi|17979041	80086.2	42.8	1.57	1	putative heat shock protein 90 [Arabidopsis thaliana]
gi|999396	80036.3	42.8	1.57	1	heat-shock Protein [Arabidopsis thaliana]
gi|23397152	80091.2	42.8	1.57	1	putative heat shock protein 81-2 (HSP81-2) [Arabidopsis thaliana]
gi|38154482	80105	42.8	1.57	1	molecular chaperone Hsp90-1 [Nicotiana benthamiana]
gi|38154489	80159.2	42.8	1.57	1	molecular chaperone Hsp90-1 [Solanum lycopersicum]
gi|38154485	80138.2	42.8	1.57	1	molecular chaperone Hsp90-2 [Nicotiana benthamiana]
gi|46093890	80123.1	42.8	1.57	1	heat shock protein 90 [Nicotiana tabacum]
gi|110083391	80209.2	42.8	1.57	1	heat shock protein 90 [Nicotiana tabacum]
gi|145351130	79825.7	42.8	1.57	1	Heat Shock Protein 90, cytosolic [Ostreococcus lucimarinus CCE9901]_x0001_gi|144580171|gb|ABO98231.1| Heat Shock Protein 90, cytosolic [Ostreococcus lucimarinus CCE9901]
gi|224086302	80006.7	42.8	1.57	1	predicted protein [Populus trichocarpa]_x0001_gi|118487540|gb|ABK95597.1| unknown [Populus trichocarpa]_x0001_gi|222853822|gb|EEE91369.1| predicted protein [Populus trichocarpa]
gi|171854657	80222.3	42.8	1.57	1	putative Hsp90-2 [Capsicum chinense]
gi|224034261	80372.4	42.8	1.57	1	unknown [Zea mays]
gi|226701026	80362.3	42.8	1.57	1	HSP protein [Zea mays]
gi|242045124	80249.2	42.8	1.57	1	hypothetical protein SORBIDRAFT_02g028050 [Sorghum bicolor]_x0001_gi|241923810|gb|EER96954.1| hypothetical protein SORBIDRAFT_02g028050 [Sorghum bicolor]
gi|242049620	80238.1	42.8	1.57	1	hypothetical protein SORBIDRAFT_02g028020 [Sorghum bicolor]_x0001_gi|241925931|gb|EER99075.1| hypothetical protein SORBIDRAFT_02g028020 [Sorghum bicolor]
gi|260408197	80358.3	42.8	1.57	1	cytosolic heat shock protein 90.1 [Dactylis glomerata]
gi|260408199	80132.1	42.8	1.57	1	cytosolic heat shock protein 90.2 [Dactylis glomerata]
gi|58262082	79339.9	42.8	1.57	1	chaperone [Cryptococcus neoformans var. neoformans JEC21]_x0001_gi|134118411|ref|XP_772092.1| hypothetical protein CNBM1380 [Cryptococcus neoformans var. neoformans B-3501A]_x0001_gi|50254699|gb|EAL17445.1| hypothetical protein CNBM1380
gi|81074298	80416.7	42.8	1.57	1	Hsp90-2-like [Solanum tuberosum]
gi|5123910	80298.1	42.8	1.57	1	HSP80-2 [Triticum aestivum]
gi|32765549	80419.3	42.8	1.57	1	cytosolic heat shock protein 90 [Hordeum vulgare]
gi|110270498	80460.4	42.8	1.57	1	heat shock protein 90 [Triticum aestivum]_x0001_gi|110270510|gb|ABG57076.1| heat shock protein 90 [Triticum aestivum]
gi|226460761	80452.6	42.8	1.57	1	predicted protein [Micromonas pusilla CCMP1545]
gi|255072105	80294.4	42.8	1.57	1	predicted protein [Micromonas sp. RCC299]_x0001_gi|226514989|gb|ACO60985.1| predicted protein [Micromonas sp. RCC299]
gi|260100692	80346.3	42.8	1.57	1	molecular chaperone Hsp90-3 [Nicotiana benthamiana]
gi|222431915	1.207	42.8	1.56	1	heat shock protein 90A [Ulva fasciata]
gi|224002893	80241.3	42.8	1.56	1	HSP90 family member [Thalassiosira pseudonana CCMP1335]_x0001_gi|220972894|gb|EED91225.1| HSP90 family member [Thalassiosira pseudonana CCMP1335]
gi|224060975	80861.7	42.8	1.56	1	predicted protein [Populus trichocarpa]_x0001_gi|222847561|gb|EEE85108.1| predicted protein [Populus trichocarpa]
gi|255091016	81166.2	42.8	1.56	1	heat shock protein 90 [Haemonchus contortus]
gi|254583081	81840.8	42.8	1.54	1	ZYRO0E07986p [Zygosaccharomyces rouxii]_x0001_gi|238942846|emb|CAR31017.1| ZYRO0E07986p [Zygosaccharomyces rouxii]
gi|226442055	82160.2	42.8	1.54	1	heat shock protein 90 [Pteromalus puparum]
gi|220028647	82580.5	42.8	1.53	1	heat shock protein 90 [Spodoptera exigua]
gi|229562186	82638.6	42.8	1.53	1	heat shock protein 90 [Spodoptera exigua]
gi|229893634	82293.2	42.8	1.53	1	heat shock protein 90-2 [Portunus trituberculatus]
gi|256862210	82588.5	42.8	1.53	1	heat shock protein 90 [Helicoverpa zea]
gi|226429770	82648.8	42.8	1.53	1	heat shock protein 90 [Litomosoides sigmodontis]
gi|238818577	82816.9	42.8	1.53	1	Hsp90 [Heterodera glycines]
gi|238818579	82857	42.8	1.53	1	Hsp90 [Heterodera glycines]
gi|238803827	1083039	42.8	1.52	1	heat shock protein 90 [Meloidogyne artiellia]
gi|238803829	83313.6	42.8	1.52	1	heat shock protein 90 [Meloidogyne artiellia]
gi|261826172	84134.2	42.8	1.51	1	heat shock protein 90 [Haliotis discus hannai]
gi|194245631	83435.3	42.8	1.51	1	heat shock protein 90 [Laternula elliptica]
gi|118404692	82440.5	98.4	6.16	4	heat shock protein 90kDa alpha (cytosolic), class A member 1, gene 2 [Xenopus (Silurana) tropicalis]_x0001_gi|116487852|gb|AAI25799.1| Heat shock protein 90kDa alpha (cytosolic), class A member 1, gene 2 [Xenopus tropicalis]
gi|150034859	83330.1	80.5	3.75	3	heat shock protein 90 [Metapenaeus ensis]_x0001_gi|150034861|gb|ABR66911.1| heat shock protein 90 [Metapenaeus ensis]
gi|229893632	83346.1	75.8	2.77	2	heat shock protein 90-1 [Portunus trituberculatus]
gi|147770307	2.07979e+06	42.8	1.57	1	hypothetical protein [Vitis vinifera]
gi|113681112	84690.9	98.4	5.99	4	heat shock protein 90-alpha 2 [Danio rerio]_x0001_gi|56207786|emb|CAI21044.1| novel protein similar to heat shock protein 90-alpha (hsp90a) [Danio rerio]_x0001_gi|190339984|gb|AAI63166.1| Heat shock protein 90-alpha 2 [Danio rerio]
gi|159155876	29561.1	97.2	11.97	3	Hsp90a.2 protein [Danio rerio]
gi|126632138	41581.6	97.2	8.59	3	Hsp90a.2 protein [Danio rerio]
gi|109096835	58881.8	98.3	5.95	3	PREDICTED: similar to keratin 1 isoform 1 [Macaca mulatta]
gi|109096833	61603.5	98.3	5.58	3	PREDICTED: similar to keratin 1 isoform 2 [Macaca mulatta]
gi|109096829	61875.6	98.3	5.57	3	PREDICTED: similar to keratin 1 isoform 4 [Macaca mulatta]
gi|109096827	63017.7	98.3	5.44	3	PREDICTED: similar to keratin 1 isoform 3 [Macaca mulatta]
gi|109096831	63063.6	98.3	5.37	3	PREDICTED: similar to keratin 1 isoform 6 [Macaca mulatta]
gi|109096825	64371.1	98.3	5.28	3	PREDICTED: similar to keratin 1 isoform 5 [Macaca mulatta]
gi|109096823	65209	98.3	5.19	3	PREDICTED: similar to keratin 1 isoform 7 [Macaca mulatta]
gi|160961491	65489.1	98.3	5.18	3	keratin 1 [Pan troglodytes]_x0001_gi|215275331|sp|A5A6M6.1|K2C1_PANTR RecName: Full=Keratin, type II cytoskeletal 1; AltName: Full=Cytokeratin-1; Short=CK-1; AltName: Full=Keratin-1; Short=K1_x0001_gi|146741486|dbj|BAF62399.1| kerati
gi|11935049	66066.7	98.3	5.12	3	keratin 1 [Homo sapiens]_x0001_gi|39794653|gb|AAH63697.1| Keratin 1 [Homo sapiens]
gi|7331218	66017.6	98.3	5.12	3	keratin 1 [Homo sapiens]_x0001_gi|186772|gb|AAB47721.1| keratin 1 [Homo sapiens]
gi|119395750	66038.7	98.3	5.12	3	keratin 1 [Homo sapiens]_x0001_gi|238054406|sp|P04264.6|K2C1_HUMAN RecName: Full=Keratin, type II cytoskeletal 1; AltName: Full=Cytokeratin-1; Short=CK-1; AltName: Full=Keratin-1; Short=K1; AltName: Full=67 kDa cytokeratin; AltNam
gi|189054178	66019.7	98.3	5.12	3	unnamed protein product [Homo sapiens]
gi|50979272	63789.8	83.7	3.55	2	keratin 1 [Canis lupus familiaris]_x0001_gi|75062693|sp|Q6EIY9.1|K2C1_CANFA RecName: Full=Keratin, type II cytoskeletal 1; AltName: Full=Cytokeratin-1; Short=CK-1; AltName: Full=Keratin-1; Short=K1; AltName: Full=Epithelial kera
gi|146741296	1065087	83.7	3.5	2	keratin 1 [Sus scrofa]
gi|73996498	107414	66.1	2.15	2	PREDICTED: similar to cytokeratin type II [Canis familiaris]
gi|73996340	97183.5	64.4	2.74	3	PREDICTED: similar to Keratin, type II cytoskeletal 5 (Cytokeratin 5) (K5) (CK 5) (58 kDa cytokeratin) isoform 1 [Canis familiaris]
gi|73996344	103462	64.4	2.55	3	PREDICTED: similar to Keratin, type II cytoskeletal 5 (Cytokeratin 5) (K5) (CK 5) (58 kDa cytokeratin) isoform 18 [Canis familiaris]
gi|73996328	102091	64.4	2.54	3	PREDICTED: similar to keratin 6 irs isoform 11 [Canis familiaris]
gi|73996346	104551	64.4	2.51	3	PREDICTED: similar to Keratin, type II cytoskeletal 5 (Cytokeratin 5) (K5) (CK 5) (58 kDa cytokeratin) isoform 19 [Canis familiaris]
gi|73996348	105007	64.4	2.49	3	PREDICTED: similar to Keratin, type II cytoskeletal 5 (Cytokeratin 5) (K5) (CK 5) (58 kDa cytokeratin) isoform 20 [Canis familiaris]
gi|73996338	105677	64.4	2.47	3	PREDICTED: similar to Keratin, type II cytoskeletal 5 (Cytokeratin 5) (K5) (CK 5) (58 kDa cytokeratin) isoform 16 [Canis familiaris]
gi|73996312	105803	64.4	2.46	3	PREDICTED: similar to Keratin, type II cytoskeletal 5 (Cytokeratin 5) (K5) (CK 5) (58 kDa cytokeratin) isoform 3 [Canis familiaris]
gi|73996334	105852	64.4	2.46	3	PREDICTED: similar to Keratin, type II cytoskeletal 5 (Cytokeratin 5) (K5) (CK 5) (58 kDa cytokeratin) isoform 14 [Canis familiaris]
gi|148672084	34796.7	60.9	3.49	1	mCG17577 [Mus musculus]
gi|148672085	38142.7	60.9	3.12	1	mCG144996 [Mus musculus]
gi|73996316	45732.4	60.9	2.42	1	PREDICTED: similar to keratin complex 2, basic, gene 5 isoform 5 [Canis familiaris]
gi|73996336	52925.2	60.9	2.26	1	PREDICTED: similar to Keratin, type II cytoskeletal 5 (Cytokeratin 5) (K5) (CK 5) (58 kDa cytokeratin) isoform 15 [Canis familiaris]
gi|149031961	54532	60.9	2.2	1	rCG50520 [Rattus norvegicus]
gi|6980088	56618.8	60.9	2.08	1	inner-ear cytokeratin [Rana catesbeiana]
gi|114145409	57609.6	60.9	2.07	1	type II keratin Kb15 [Rattus norvegicus]_x0001_gi|46485029|tpg|DAA02236.1| TPA_exp: type II keratin Kb15 [Rattus norvegicus]
gi|149031969	56775.1	60.9	2.06	1	rCG50775 [Rattus norvegicus]
gi|73996463	57562.3	60.9	2.06	1	PREDICTED: similar to keratin 6L [Canis familiaris]
gi|149031974	58096.2	60.9	2.05	1	type II keratin Kb15 [Rattus norvegicus]
gi|166218811	59026.7	60.9	2.03	1	RecName: Full=Keratin, type II cytoskeletal 75; AltName: Full=Cytokeratin-75; Short=CK-75; AltName: Full=Keratin-75; Short=K75; AltName: Full=Type II keratin-18; AltName: Full=Type II keratin-K6hf; AltName: Full=Keratin
gi|116004057	59035.9	60.9	2.03	1	keratin 75 [Bos taurus]_x0001_gi|122132186|sp|Q08D91.1|K2C75_BOVIN RecName: Full=Keratin, type II cytoskeletal 75; AltName: Full=Cytokeratin-75; Short=CK-75; AltName: Full=Keratin-75; Short=K75; AltName: Full=Type II keratin-K6
gi|149714746	59254.9	60.9	2	1	PREDICTED: similar to type II keratin Kb18 isoform 1 [Equus caballus]
gi|29789317	59740.6	60.9	2	1	keratin 75 [Mus musculus]_x0001_gi|81896062|sp|Q8BGZ7.1|K2C75_MOUSE RecName: Full=Keratin, type II cytoskeletal 75; AltName: Full=Cytokeratin-75; Short=CK-75; AltName: Full=Keratin-75; Short=K75; AltName: Full=Type II keratin-18; A
gi|155369696	59249.1	60.9	1.99	1	hypothetical protein LOC683313 [Rattus norvegicus]_x0001_gi|123781839|sp|Q4FZU2.1|K2C6A_RAT RecName: Full=Keratin, type II cytoskeletal 6A; AltName: Full=Cytokeratin-6A; Short=CK 6A; AltName: Full=K6a keratin_x0001_gi|71051822|gb|AAH
gi|109482943	59379.4	60.9	1.99	1	PREDICTED: similar to keratin complex 2, basic, gene 6a isoform 2 [Rattus norvegicus]
gi|109482941	59429.5	60.9	1.99	1	PREDICTED: similar to keratin complex 2, basic, gene 6a isoform 1 [Rattus norvegicus]
gi|54607171	59335.2	60.9	1.99	1	keratin 6A [Mus musculus]_x0001_gi|60416436|sp|P50446.3|K2C6A_MOUSE RecName: Full=Keratin, type II cytoskeletal 6A; AltName: Full=Cytokeratin-6A; Short=CK 6A; AltName: Full=K6a keratin; AltName: Full=Keratin-6 alpha; Short=mK6-alph
gi|113195684	59526.4	60.9	1.99	1	keratin complex 2, basic, gene 6b [Mus musculus]_x0001_gi|74200551|dbj|BAE23462.1| unnamed protein product [Mus musculus]
gi|116063325	60191.1	60.9	1.96	1	Krt6b protein [Mus musculus]_x0001_gi|116487743|gb|AAI24557.1| Krt6b protein [Mus musculus]
gi|59798479	60322.3	60.9	1.96	1	RecName: Full=Keratin, type II cytoskeletal 6B; AltName: Full=Cytokeratin-6B; Short=CK 6B; AltName: Full=K6b keratin; AltName: Full=Keratin-6 beta; Short=mK6-beta_x0001_gi|3845568|dbj|BAA34179.1| keratin 6 beta [Mus musculus
gi|110645788	60273.2	60.9	1.96	1	Krt6b protein [Mus musculus]_x0001_gi|115528853|gb|AAI19555.1| Krt6b protein [Mus musculus]_x0001_gi|141796960|gb|AAI39808.1| Krt6b protein [Mus musculus]
gi|194212019	59887.8	60.9	1.96	1	PREDICTED: similar to Keratin, type II cytoskeletal 6A (Cytokeratin-6A) (CK 6A) (K6a keratin) (Cytokeratin-6D) (CK 6D) (Allergen Hom s 5) [Equus caballus]
gi|149714749	61506.6	60.9	1.94	1	PREDICTED: similar to type II keratin Kb18 isoform 2 [Equus caballus]
gi|73996350	60601.6	60.9	1.93	1	PREDICTED: similar to Keratin, type II cytoskeletal 5 (Cytokeratin 5) (K5) (CK 5) (58 kDa cytokeratin) isoform 2 [Canis familiaris]
gi|57012352	62168.4	60.9	1.92	1	keratin 75 [Rattus norvegicus]_x0001_gi|46485112|tpg|DAA02225.1| TPA_exp: type II keratin Kb18 [Rattus norvegicus]
gi|149714759	60974.9	60.9	1.92	1	PREDICTED: similar to Keratin, type II cytoskeletal 6A (Cytokeratin-6A) (CK 6A) (K6a keratin) (Cytokeratin-6D) (CK 6D) (Allergen Hom s 5) [Equus caballus]
gi|148672089	62279.6	60.9	1.91	1	keratin 75 [Mus musculus]
gi|50233797	61926.9	60.9	1.91	1	keratin 5 [Rattus norvegicus]_x0001_gi|33519156|gb|AAQ20893.1| keratin 5 [Rattus norvegicus]
gi|81170669	61825.8	60.9	1.91	1	RecName: Full=Keratin, type II cytoskeletal 5; AltName: Full=Cytokeratin-5; Short=CK-5; AltName: Full=Keratin-5; Short=K5_x0001_gi|38303961|gb|AAH62086.1| Keratin 5 [Rattus norvegicus]
gi|20911031	61766.7	60.9	1.9	1	keratin 5 [Mus musculus]_x0001_gi|81170668|sp|Q922U2.1|K2C5_MOUSE RecName: Full=Keratin, type II cytoskeletal 5; AltName: Full=Cytokeratin-5; Short=CK-5; AltName: Full=Keratin-5; Short=K5_x0001_gi|13904996|gb|AAH06780.1| Keratin 5 [Mus m
gi|16303309	61780.7	60.9	1.9	1	type II keratin 5 [Mus musculus]
gi|73996342	61849.9	60.9	1.89	1	PREDICTED: similar to Keratin, type II cytoskeletal 5 (Cytokeratin 5) (K5) (CK 5) (58 kDa cytokeratin) isoform 17 [Canis familiaris]
gi|194212017	61577.5	60.9	1.89	1	PREDICTED: similar to Keratin, type II cytoskeletal 6A (Cytokeratin-6A) (CK 6A) (K6a keratin) (Cytokeratin-6D) (CK 6D) (Allergen Hom s 5) [Equus caballus]
gi|149714762	62435.4	60.9	1.85	1	PREDICTED: similar to keratin 5 isoform 1 [Equus caballus]
gi|73996314	62816.9	60.9	1.84	1	PREDICTED: similar to Keratin, type II cytoskeletal 5 (Cytokeratin 5) (K5) (CK 5) (58 kDa cytokeratin) isoform 4 [Canis familiaris]
gi|146186887	62682.7	60.9	1.84	1	KRT5 protein [Bos taurus]
gi|56710317	62937	60.9	1.83	1	keratin 5 [Bos taurus]_x0001_gi|75062316|sp|Q5XQN5.1|K2C5_BOVIN RecName: Full=Keratin, type II cytoskeletal 5; AltName: Full=Cytokeratin-5; Short=CK-5; AltName: Full=Keratin-5; Short=K5_x0001_gi|53854288|gb|AAU95600.1| keratin 5 [Bos
gi|73996332	64846.3	60.9	1.79	1	PREDICTED: similar to Keratin, type II cytoskeletal 5 (Cytokeratin 5) (K5) (CK 5) (58 kDa cytokeratin) isoform 13 [Canis familiaris]
gi|73987435	77883.7	98.2	5.87	4	PREDICTED: similar to Elongation factor 2 (EF-2) [Canis familiaris]
gi|38511951	93555	98.2	4.86	4	Eef2 protein [Mus musculus]
gi|8393296	95284.1	98.2	4.78	4	eukaryotic translation elongation factor 2 [Rattus norvegicus]_x0001_gi|119176|sp|P05197.4|EF2_RAT RecName: Full=Elongation factor 2; Short=EF-2_x0001_gi|56082|emb|CAA68805.1| unnamed protein product [Rattus norvegicus]_x0001_gi|44890252|gb|AAH
gi|33859482	95314.1	98.2	4.78	4	eukaryotic translation elongation factor 2 [Mus musculus]_x0001_gi|18202285|sp|P58252.2|EF2_MOUSE RecName: Full=Elongation factor 2; Short=EF-2_x0001_gi|13938072|gb|AAH07152.1| Eukaryotic translation elongation factor 2 [Mus musculus]_x0001_gi
gi|4503483	95338.2	98.2	4.78	4	eukaryotic translation elongation factor 2 [Homo sapiens]_x0001_gi|119172|sp|P13639.4|EF2_HUMAN RecName: Full=Elongation factor 2; Short=EF-2_x0001_gi|88909610|sp|Q5R8Z3.3|EF2_PONAB RecName: Full=Elongation factor 2; Short=EF-2_x0001_gi|31106|e
gi|55730085	95278.2	98.2	4.78	4	hypothetical protein [Pongo abelii]
gi|197099082	95310.2	98.2	4.78	4	eukaryotic translation elongation factor 2 [Pongo abelii]_x0001_gi|55728420|emb|CAH90954.1| hypothetical protein [Pongo abelii]
gi|74140876	95313.2	98.2	4.78	4	unnamed protein product [Mus musculus]
gi|74181334	95323.1	98.2	4.78	4	unnamed protein product [Mus musculus]
gi|74189143	95215	98.2	4.78	4	unnamed protein product [Mus musculus]
gi|74197201	95280.1	98.2	4.78	4	unnamed protein product [Mus musculus]
gi|74201313	95327.1	98.2	4.78	4	unnamed protein product [Mus musculus]
gi|74204678	95230.1	98.2	4.78	4	unnamed protein product [Mus musculus]
gi|74213791	95268	98.2	4.78	4	unnamed protein product [Mus musculus]
gi|115497900	95368.2	98.2	4.78	4	eukaryotic translation elongation factor 2 [Bos taurus]_x0001_gi|88909609|sp|Q3SYU2.3|EF2_BOVIN RecName: Full=Elongation factor 2; Short=EF-2_x0001_gi|74353984|gb|AAI03386.1| Eukaryotic translation elongation factor 2 [Bos taurus]
gi|119173	95324.1	98.2	4.78	4	RecName: Full=Elongation factor 2; Short=EF-2_x0001_gi|304505|gb|AAA50387.1| elongation factor 2 [Cricetulus griseus]
gi|600159	95310.1	98.2	4.78	4	elongation factor 2 [Cricetulus griseus]
gi|119168	95396.2	98.2	4.78	4	RecName: Full=Elongation factor 2; Short=EF-2_x0001_gi|387049|gb|AAA50386.1| elongation factor 2 [Cricetus cricetus]
gi|26324898	95258.1	98.2	4.78	4	unnamed protein product [Mus musculus]
gi|124007139	95311.2	98.2	4.78	4	RecName: Full=Elongation factor 2; Short=EF-2_x0001_gi|117949938|gb|ABK58358.1| eukaryotic translation elongation factor 2 [Callithrix jacchus]
gi|194212460	95254	98.2	4.78	4	PREDICTED: similar to Eukaryotic translation elongation factor 2 [Equus caballus]
gi|109122950	155475	98.2	2.86	4	PREDICTED: eukaryotic translation elongation factor 2 [Macaca mulatta]
gi|226795	46683.5	97.7	7.69	3	elongation factor 2
gi|114674690	79522.2	96.4	4.61	3	PREDICTED: similar to elongation factor-2 [Pan troglodytes]
gi|126272222	94069.9	96.4	3.91	3	PREDICTED: similar to elongation factor 2 isoform 2 [Monodelphis domestica]
gi|74151550	95284.1	96.4	3.85	3	unnamed protein product [Mus musculus]
gi|74190985	95256.1	96.4	3.85	3	unnamed protein product [Mus musculus]_x0001_gi|74191026|dbj|BAE39354.1| unnamed protein product [Mus musculus]
gi|126272220	95392.3	96.4	3.85	3	PREDICTED: similar to elongation factor 2 isoform 1 [Monodelphis domestica]
gi|149445919	102159	96.4	3.59	3	PREDICTED: similar to eukaryotic translation elongation factor 2 [Ornithorhynchus anatinus]
gi|126323192	108609	96.4	3.32	3	PREDICTED: similar to elongation factor 2 [Monodelphis domestica]
gi|90076858	47696.4	96	6.96	3	unnamed protein product [Macaca fascicularis]
gi|194391174	62850.1	96	5.3	3	unnamed protein product [Homo sapiens]
gi|26328763	95257	96	3.5	3	unnamed protein product [Mus musculus]
gi|74197032	95286.1	95.7	3.26	3	unnamed protein product [Mus musculus]
gi|38305346	16871	81.7	13.91	2	antigen MLAA-42 [Homo sapiens]
gi|12805513	32056.4	81.7	7.32	2	Eef2 protein [Mus musculus]
gi|21322619	33878.6	81.7	6.93	2	elongation factor-2 [Rattus norvegicus]
gi|2130649	34557.3	81.7	6.8	2	EF-2 [Rattus norvegicus]
gi|203997	38200.6	81.7	6.12	2	elongation factor 2 [Rattus norvegicus]
gi|181969	39775.5	81.7	5.87	2	elongation factor 2 [Homo sapiens]
gi|74216724	40849.8	81.7	5.72	2	unnamed protein product [Mus musculus]
gi|74187393	46524.5	81.7	5.02	2	unnamed protein product [Mus musculus]
gi|149253258	46035.1	81.7	5.02	2	PREDICTED: similar to Eukaryotic translation elongation factor 2 [Mus musculus]
gi|19353009	57500.4	81.7	4.06	2	Similar to Elongation factor 2b [Homo sapiens]
gi|74002332	63559.7	80.6	3.34	2	PREDICTED: similar to Elongation factor 2 (EF-2) [Canis familiaris]
gi|194387694	55669.6	76.4	3.96	2	unnamed protein product [Homo sapiens]
gi|33869643	64780.9	76.4	3.43	2	EEF2 protein [Homo sapiens]
gi|45382453	95378.3	76.4	2.33	2	eukaryotic translation elongation factor 2 [Gallus gallus]_x0001_gi|2494246|sp|Q90705.3|EF2_CHICK RecName: Full=Elongation factor 2; Short=EF-2_x0001_gi|1184958|gb|AAA87587.1| elongation factor 2 [Gallus gallus]
gi|224087919	134481	76.4	1.68	2	PREDICTED: eukaryotic translation elongation factor 2 [Taeniopygia guttata]
gi|62752006	95491.4	68.2	1.98	2	MGC108369 protein [Xenopus (Silurana) tropicalis]_x0001_gi|58476387|gb|AAH89730.1| MGC108369 protein [Xenopus (Silurana) tropicalis]
gi|269994436	36069.3	59	3.4	1	eukaryotic translation elongation factor 2 [Leiolepis reevesii rubritaeniata]
gi|63146080	45090.7	48.1	1.97	1	elongation factor 2 [Oxyuranus scutellatus scutellatus]
gi|147903669	39091.2	27.8	2.57	1	hypothetical protein LOC398780 [Xenopus laevis]_x0001_gi|37748712|gb|AAH60025.1| MGC68699 protein [Xenopus laevis]
gi|71153339	140917	97.4	4.1	5	RecName: Full=ATP-dependent RNA helicase A; AltName: Full=Nuclear DNA helicase II; Short=NDH II; AltName: Full=DEAH box protein 9_x0001_gi|55730630|emb|CAH92036.1| hypothetical protein [Pongo abelii]
gi|1806048	140877	97.4	4.09	5	nuclear DNA helicase II [Homo sapiens]
gi|100913206	140958	97.4	4.09	5	DEAH (Asp-Glu-Ala-His) box polypeptide 9 [Homo sapiens]_x0001_gi|116241330|sp|Q08211.4|DHX9_HUMAN RecName: Full=ATP-dependent RNA helicase A; AltName: Full=Nuclear DNA helicase II; Short=NDH II; AltName: Full=DEAH box protein 9_x0001_gi
gi|109019116	141315	97.4	4.08	5	PREDICTED: DEAH (Asp-Glu-Ala-His) box polypeptide 9 isoform 1 [Macaca mulatta]_x0001_gi|109019118|ref|XP_001114405.1| PREDICTED: DEAH (Asp-Glu-Ala-His) box polypeptide 9 isoform 2 [Macaca mulatta]
gi|126306309	139260	97.2	2.71	3	PREDICTED: similar to DEAH (Asp-Glu-Ala-His) box polypeptide 9 [Monodelphis domestica]
gi|194210388	140611	97.2	2.67	3	PREDICTED: DEAH (Asp-Glu-Ala-His) box polypeptide 9 [Equus caballus]
gi|73960435	141262	97.2	2.66	3	PREDICTED: similar to ATP-dependent RNA helicase A (Nuclear DNA helicase II) (NDH II) (DEAH-box protein 9) isoform 2 [Canis familiaris]_x0001_gi|73960445|ref|XP_537154.2| PREDICTED: similar to ATP-dependent RNA helicase A (Nuclear
gi|73960443	142216	97.2	2.65	3	PREDICTED: similar to ATP-dependent RNA helicase A (Nuclear DNA helicase II) (NDH II) (DEAH-box protein 9) isoform 7 [Canis familiaris]
gi|73960441	142391	97.2	2.65	3	PREDICTED: similar to ATP-dependent RNA helicase A (Nuclear DNA helicase II) (NDH II) (DEAH-box protein 9) isoform 6 [Canis familiaris]
gi|27806665	141944	97.2	2.64	3	DEAH (Asp-Glu-Ala-His) box polypeptide 9 [Bos taurus]_x0001_gi|2500541|sp|Q28141.1|DHX9_BOVIN RecName: Full=ATP-dependent RNA helicase A; AltName: Full=Nuclear DNA helicase II; Short=NDH II; AltName: Full=DEAH box protein 9_x0001_gi|5777
gi|119611543	114118	89.3	4.14	4	DEAH (Asp-Glu-Ala-His) box polypeptide 9, isoform CRA_a [Homo sapiens]
gi|1082769	142073	89.3	3.28	4	RNA helicase A - human
gi|307383	142069	89.3	3.28	4	RNA helicase A [Homo sapiens]
gi|148707489	131720	88.1	2.81	3	DEAH (Asp-Glu-Ala-His) box polypeptide 9, isoform CRA_a [Mus musculus]
gi|157821633	131731	88.1	2.81	3	DEAH (Asp-Glu-Ala-His) box polypeptide 9 [Rattus norvegicus]_x0001_gi|149058390|gb|EDM09547.1| DEAH (Asp-Glu-Ala-His) box polypeptide 9 (predicted) [Rattus norvegicus]
gi|71153505	149474	88.1	2.39	3	RecName: Full=ATP-dependent RNA helicase A; AltName: Full=Nuclear DNA helicase II; Short=NDH II; AltName: Full=DEAH box protein 9; Short=mHEL-5
gi|2961456	149582	88.1	2.39	3	RNA helicase A [Mus musculus]
gi|150456419	149618	88.1	2.39	3	DEAH (Asp-Glu-Ala-His) box polypeptide 9 [Mus musculus]
gi|148707490	149731	88.1	2.38	3	DEAH (Asp-Glu-Ala-His) box polypeptide 9, isoform CRA_b [Mus musculus]
gi|81294349	47683.2	80.9	5.64	2	DHX9 protein [Homo sapiens]
gi|193788434	59947.6	80.9	4.55	2	unnamed protein product [Homo sapiens]
gi|73960439	76022.1	80.9	3.6	2	PREDICTED: similar to ATP-dependent RNA helicase A (Nuclear DNA helicase II) (NDH II) (DEAH-box protein 9) isoform 5 [Canis familiaris]
gi|218675672	59270.3	66.8	4.38	2	DEAH (Asp-Glu-Ala-His) box polypeptide 9 [synthetic construct]
gi|2465310	60272.7	66.8	4.31	2	DNA helicase II [Mus musculus]
gi|999627	8818.99	97	57.32	6	Chain B, Refined 1.8 Angstroms Resolution Crystal Structure Of Porcine Epsilon-Trypsin
gi|1942351	13292	97	37.6	6	Chain A, Crystal Structure Of The First Active Autolysate Form Of The Porcine Alpha Trypsin_x0001_gi|51247812|pdb|1UHB|A Chain A, Crystal Structure Of Porcine Alpha Trypsin Bound With Auto Catalyticaly Produced Native Peptide At 2.15 A Re
gi|2914482	23475.5	97	21.08	6	Chain A, Complex Of The Second Kunitz Domain Of Tissue Factor Pathway Inhibitor With Porcine Trypsin_x0001_gi|2914483|pdb|1TFX|B Chain B, Complex Of The Second Kunitz Domain Of Tissue Factor Pathway Inhibitor With Porcine Trypsin_x0001_gi|32125
gi|494360	23473.6	97	21.08	6	Chain A, The Refined 1.6 Angstroms Resolution Crystal Structure Of The Complex Formed Between Porcine Beta-Trypsin And Mcti-A, A Trypsin Inhibitor Of Squash Family_x0001_gi|9257116|pdb|1QQU|A Chain A, Crystal Structure Of Porcine Beta Tryp
gi|110590762	1.02336e+06	97	21.08	6	Chain A, Trypsin In Complex With Borate_x0001_gi|110590763|pdb|2A32|A Chain A, Trypsin In Complex With Benzene Boronic Acid
gi|136429	24409.5	97	20.35	6	RecName: Full=Trypsin; Flags: Precursor
gi|157878102	24172.2	97	20.35	6	Chain E, Complex Of Eeti-Ii With Porcine Trypsin
gi|242253868	25881.3	97	19.11	6	trypsinogen [Sus scrofa]_x0001_gi|238866766|gb|ACR67004.1| trypsinogen precursor [Sus scrofa]
gi|3318722	1.02336e+06	83.8	17.04	5	Chain E, Leech-Derived Tryptase InhibitorTRYPSIN COMPLEX
gi|257472074	23476.5	83.8	17.04	5	Chain A, Complex Of Bdellastasin With Porcine Trypsin
gi|73978535	18453	35.2	5.26	1	PREDICTED: similar to Cationic trypsin III precursor (Pretrypsinogen III) isoform 6 [Canis familiaris]
gi|136406	26169.9	35.2	3.66	1	RecName: Full=Cationic trypsin; Flags: Precursor_x0001_gi|164097|gb|AAA30900.1| cationic trypsinogen precursor [Canis sp.]
gi|57097397	26278	35.2	3.66	1	PREDICTED: similar to trypsinogen 7 isoform 3 [Canis familiaris]
gi|73978533	26335.1	35.2	3.64	1	PREDICTED: similar to trypsinogen 7 isoform 5 [Canis familiaris]
gi|260817768	78456.7	96.4	4.51	3	hypothetical protein BRAFLDRAFT_59675 [Branchiostoma floridae]_x0001_gi|229289080|gb|EEN59768.1| hypothetical protein BRAFLDRAFT_59675 [Branchiostoma floridae]
gi|12746296	95592.1	95.9	4.14	4	110 kDa NFAR protein [Homo sapiens]
gi|9081982	55263.1	95.9	5.63	3	dsRNA binding protein NFAR-1/DRB76 [Homo sapiens]
gi|9714266	60554.4	95.9	5.14	3	DRBP76 alpha [Homo sapiens]
gi|9081983	61871.1	95.9	5.03	3	dsRNA binding protein TCP-80 isoform [Homo sapiens]
gi|1770458	66744.7	95.9	4.75	3	M-phase phosphoprotein 4 [Homo sapiens]
gi|24234756	74607.5	95.9	4.2	3	interleukin enhancer binding factor 3 isoform c [Homo sapiens]_x0001_gi|9714270|emb|CAC01406.1| double-stranded RNA binding nuclear protein DRBP76 delta [Homo sapiens]
gi|114675411	75132.1	95.9	4.18	3	PREDICTED: interleukin enhancer binding factor 3 isoform 3 [Pan troglodytes]
gi|114675415	75563.6	95.9	4.15	3	PREDICTED: interleukin enhancer binding factor 3 isoform 4 [Pan troglodytes]
gi|24234753	76032.9	95.9	4.13	3	interleukin enhancer binding factor 3 isoform b [Homo sapiens]_x0001_gi|9714268|emb|CAC01405.1| double-stranded RNA binding nuclear protein DRBP76 [Homo sapiens]_x0001_gi|119604537|gb|EAW84131.1| interleukin enhancer binding factor 3, 90
gi|5762313	76079	95.9	4.13	3	nuclear factor associated with dsRNA NFAR-1 [Homo sapiens]
gi|4929371	76089	95.9	4.13	3	double-stranded RNA-binding nuclear protein DRBP76 [Homo sapiens]
gi|12746295	76115	95.9	4.13	3	90 kDa NFAR protein [Homo sapiens]
gi|158255846	76050.9	95.9	4.13	3	unnamed protein product [Homo sapiens]
gi|212549555	76502.4	95.9	4.11	3	interleukin enhancer binding factor 3 isoform e [Homo sapiens]_x0001_gi|40674401|gb|AAH64836.1| ILF3 protein [Homo sapiens]_x0001_gi|158256666|dbj|BAF84306.1| unnamed protein product [Homo sapiens]
gi|114675409	76557.5	95.9	4.11	3	PREDICTED: interleukin enhancer binding factor 3 isoform 5 [Pan troglodytes]
gi|9081981	74712.9	95.9	4.09	3	dsRNA binding protein NFAR-2/MPP4 [Homo sapiens]
gi|114675413	78819.6	95.9	4	3	PREDICTED: interleukin enhancer binding factor 3 isoform 2 [Pan troglodytes]
gi|5006602	82802.1	95.9	3.8	3	translational control protein 80 [Homo sapiens]
gi|114675417	82807.1	95.9	3.8	3	PREDICTED: interleukin enhancer binding factor 3 isoform 6 [Pan troglodytes]
gi|119604541	82924.2	95.9	3.79	3	interleukin enhancer binding factor 3, 90kDa, isoform CRA_e [Homo sapiens]
gi|114675407	83368.4	95.9	3.73	3	PREDICTED: interleukin enhancer binding factor 3 isoform 10 [Pan troglodytes]
gi|119604539	91688.6	95.9	3.38	3	interleukin enhancer binding factor 3, 90kDa, isoform CRA_c [Homo sapiens]
gi|114675405	91994	95.9	3.37	3	PREDICTED: interleukin enhancer binding factor 3 isoform 1 [Pan troglodytes]
gi|24234750	95338.8	95.9	3.24	3	interleukin enhancer binding factor 3 isoform a [Homo sapiens]_x0001_gi|62512150|sp|Q12906.3|ILF3_HUMAN RecName: Full=Interleukin enhancer-binding factor 3; AltName: Full=Nuclear factor of activated T-cells 90 kDa; Short=NF-AT-90;
gi|5762315	95384.9	95.9	3.24	3	nuclear factor associated with dsRNA NFAR-2 [Homo sapiens]
gi|109123374	95365.8	95.9	3.24	3	PREDICTED: similar to interleukin enhancer binding factor 3 isoform a [Macaca mulatta]
gi|114675419	95448.9	95.9	3.24	3	PREDICTED: interleukin enhancer binding factor 3 isoform 12 [Pan troglodytes]
gi|114675403	95619.1	95.9	3.24	3	PREDICTED: interleukin enhancer binding factor 3 isoform 9 [Pan troglodytes]
gi|114675397	95833.4	95.9	3.23	3	PREDICTED: interleukin enhancer binding factor 3 isoform 7 [Pan troglodytes]_x0001_gi|114675399|ref|XP_001166503.1| PREDICTED: interleukin enhancer binding factor 3 isoform 8 [Pan troglodytes]_x0001_gi|114675401|ref|XP_001166614.1| P
gi|212549553	95808.3	95.9	3.23	3	interleukin enhancer binding factor 3 isoform d [Homo sapiens]_x0001_gi|119604538|gb|EAW84132.1| interleukin enhancer binding factor 3, 90kDa, isoform CRA_b [Homo sapiens]_x0001_gi|261859362|dbj|BAI46203.1| interleukin enhancer binding
gi|2852617	12019.3	59.8	10.34	1	unknown [Homo sapiens]
gi|66270756	65093.1	94	6.58	7	RecA/GFP fusion protein [Cloning vector pSJS1472]
gi|156104659	17416.7	95.7	23.87	6	truncated YFP venus [Cloning vector pDH51-GW-YFPn]_x0001_gi|239914002|emb|CAZ61336.1| nYFP protein [Cloning vector pG005]
gi|190336464	18831.4	95.7	22.29	6	SPYNE [BiFC expression vector 35S-SPYNE]
gi|190336438	20611.3	95.7	20.44	6	SCYNE [BiFC expression vector 35S-SCYNE]
gi|190336446	20279.9	95.7	20.33	6	SPYNE(R)155 [BiFC expression vector 35S-SPYNE(R)155]
gi|190336444	20994.9	95.6	20.11	6	SPYNE173 [BiFC expression vector 35S-SPYNE173]
gi|190336456	20868.7	95.6	20.11	6	VYNE [BiFC expression vector 35S-VYNE]
gi|190336436	22190.9	95.6	18.69	6	SCYNE [BiFC expression vector 35S-SCYNE(R)]
gi|190336448	22443.4	95.6	18.5	6	SPYNE(R)173 [BiFC expression vector 35S-SPYNE(R)173]
gi|190336454	22317.2	95.6	18.5	6	VYNE(R) [BiFC expression vector 35S-VYNE(R)]
gi|39654399	2.02498e+06	95.5	16.44	6	Chain A, Expansion Of The Genetic Code Enables Design Of A Novel "gold" Class Of Green Fluorescent Proteins
gi|108937308	25283.6	95.5	16.44	6	yellow fluorescent protein aphrodite [synthetic construct]
gi|108937306	25353.6	95.5	16.44	6	cyan fluorescent protein ares [synthetic construct]
gi|37926353	1.02535e+06	95.5	16.37	6	Chain A, Crystal Structure Of Enhanced Cyan-Emission Variant Of Gfp
gi|49258765	2025151	95.5	16.37	6	Chain A, Probing The Role Of Tryptophans In Aequorea Victoria Green Fluorescent Proteins With An Expanded Genetic Code_x0001_gi|49258767|pdb|1RMP|A Chain A, Probing The Role Of Tryptophans In Aequorea Victoria Green Fluorescent Proteins
gi|49258766	2.0263e+06	95.5	15.68	6	Chain A, Probing The Role Of Tryptophans In Aequorea Victoria Green Fluorescent Proteins With An Expanded Genetic Code
gi|161760919	1.02656e+06	95.5	15.68	6	Chain A, A Non-Invasive Gfp-Based Biosensor For Mercury Ions_x0001_gi|161760920|pdb|2OKW|B Chain B, A Non-Invasive Gfp-Based Biosensor For Mercury Ions_x0001_gi|161760921|pdb|2OKW|C Chain C, A Non-Invasive Gfp-Based Biosensor For Mercury Ions
gi|178847036	1.02658e+06	95.5	15.68	6	Chain A, Crystal Structure Of V224h Design Intermediate For Gfp Metal Ion Reporter
gi|178847037	1.02657e+06	95.5	15.68	6	Chain A, Crystal Structure Of L42h Design Intermediate For Gfp Metal Ion Reporter
gi|17129567	26900.3	95.5	15.55	6	green fluorescent protein GFP [Cloning vector pRTHSP70-GFP]_x0001_gi|19550236|gb|AAL17988.1| green fluorescent protein [Expression vector pNUS-GFPcH]_x0001_gi|42741004|gb|AAS44582.1| green florescent protein [Gene trapping vector pEU334AN
gi|741846	26877.4	95.5	15.55	6	green fluorescent protein
gi|211909965	26840.3	95.5	15.55	6	green fluorescent protein [Neisseria gonorrhoeae]_x0001_gi|4704643|gb|AAD28189.1|AF110459_2 green fluorescent protein [Cloning vector pBBR1-GFP]_x0001_gi|1669868|gb|AAB18957.1| green fluorescent protein mutant 3 [Aequorea victoria]_x0001_g
gi|1169893	26886.3	95.5	15.55	6	RecName: Full=Green fluorescent protein_x0001_gi|26892273|gb|AAN86139.1|AF324407_1 green fluorescence protein [Azotobacter vinelandii]_x0001_gi|155661|gb|AAA27721.1| green-fluorescent protein [Aequorea victoria]_x0001_gi|894140|gb|AAA69675
gi|60115915	26909.4	95.5	15.55	6	green fluorescent protein mut3 variant [Reporter vector pUS23]_x0001_gi|78675526|dbj|BAE47519.1| green fluorescent protein [Expression vector pLD601]_x0001_gi|262478124|gb|ACY68259.1| GFPmut3 [Integrative vector pBaSysBioII]
gi|4585227	26868.3	95.5	15.55	6	green fluorescent protein [Cloning vector pLM10]_x0001_gi|25246289|gb|AAN72829.1| green fluorescent protein mutant 2 [Expression vector pIVETHP]_x0001_gi|37929993|gb|AAP74489.1| Gfp [Cloning vector pKZ22]_x0001_gi|37930003|gb|AAP74491.1| Gfp [Clo
gi|55380584	26782.3	95.5	15.55	6	green-fluorescent protein [Bursa aurealis delivery vector pBursa]
gi|6118373	26862.4	95.5	15.55	6	green fluorescent protein [synthetic construct]
gi|5881102	26858.3	95.5	15.55	6	green fluorescent protein [Expression vector FRMwg]
gi|11321072	26830.3	95.5	15.55	6	cyan fluorescent protein cfp [cfp marker plasmid pWM1009]_x0001_gi|11321082|gb|AAG34048.1| cyan fluorescent protein cfp [cfp marker plasmid pWM1012]
gi|146386837	2.02666e+06	95.5	15.55	6	Chain A, Green Fluorescent Protein Ground States: The Influence Of A Second Protonation Site Near The Chromophore
gi|156079885	26830.3	95.5	15.55	6	cyan fluorescent protein [Cloning vector pAW8-yECFP]
gi|156079880	26866.3	95.5	15.55	6	green fluorescent protein [Cloning vector pAW8-yEGFP]_x0001_gi|205363581|gb|ACI04260.1| GFPopt [synthetic construct]_x0001_gi|215882185|gb|ACJ70711.1| GFP [Fusion vector pFRT1-gfp-Tel]_x0001_gi|215882194|gb|ACJ70715.1| GFP [Fusion vector pFRT2-
gi|156079888	26885.4	95.5	15.55	6	yellow fluorescent protein [Cloning vector pAW8-yECitrine]
gi|158392792	26872.3	95.5	15.55	6	green fluorescent protein [S. pombe expression vector pDUAL-HFG1]_x0001_gi|158392796|dbj|BAF90728.1| green fluorescent protein [S. pombe expression vector pDUAL-HFG41]_x0001_gi|158392800|dbj|BAF90731.1| green fluorescent protein [S. pomb
gi|158392812	26902.4	95.5	15.55	6	green fluorescent protein [S. pombe expression vector pDUAL-GFH1]_x0001_gi|158392816|dbj|BAF90742.1| green fluorescent protein [S. pombe expression vector pDUAL-GFH41]_x0001_gi|158392820|dbj|BAF90745.1| green fluorescent protein [S. pomb
gi|161347205	26870.3	95.5	15.55	6	GFP protein [Cloning vector pSAM]_x0001_gi|161347210|gb|ABX65305.1| GFP protein [Cloning vector pNICO]_x0001_gi|161347213|gb|ABX65307.1| GFP protein [Cloning vector pNC-GFP]
gi|186703061	26810.3	95.5	15.55	6	enhanced green fluorescent protein [Cloning vector pEGFPpA-ACN]_x0001_gi|239949624|gb|ACS36609.1| green fluorescent protein [Broad host range translational fusion vector pJH2]
gi|186703066	26774.2	95.5	15.55	6	enhanced cyan fluorescent protein [Cloning vector pECFPpA-ACN]
gi|186703081	26860.3	95.5	15.55	6	enhanced yellow fluorescent protein [Cloning vector pEYFPpA-ACN]
gi|205363585	26882.4	95.5	15.55	6	YFPopt [synthetic construct]
gi|205363587	26894.3	95.5	15.55	6	PAGFPopt [synthetic construct]
gi|207339212	26763.2	95.5	15.55	6	yellow fluorescent protein [Integrating YFP promoter analysis vector pJG100]
gi|218156188	26676.1	95.5	15.55	6	Cerulean protein [Moss transformation vector pPIG1HGC]
gi|13194618	26941.5	95.5	15.48	6	enhanced green fluorescent protein [EGFP expression vector Ad-EGFP]_x0001_gi|15986717|gb|AAL11719.1|AF402295_1 enhanced green fluorescent protein [pk[BIG-alpha] piggyBac transformation vector]_x0001_gi|1373322|gb|AAB08062.1| Enha
gi|9836654	26967.5	95.5	15.48	6	enhanced cyan-green fluorescent protein [synthetic construct]
gi|2708486	26999.5	95.5	15.48	6	green fluorescent protein GFP+ [synthetic construct]_x0001_gi|81238234|gb|ABB59980.1| modified green fluorescent protein SGFPS65T [Immobile Ac/T-DNA vector pKU352NA]_x0001_gi|81238240|gb|ABB59985.1| modified green fluorescent protein SGFPS6
gi|48995609	26905.4	95.5	15.48	6	cyan fluorescent protein [Cloning vector pSRalphablastC]_x0001_gi|56553592|gb|AAV97923.1| ECFP [Cloning vector pSAT6-ECFP-N1]_x0001_gi|60594767|gb|AAX29988.1| enhanced cyan fluorescent protein [Expression vector pINV-110]_x0001_gi|62114613|gb|AA
gi|72003816	26802.3	95.5	15.48	6	fluorescent protein SCFP3B [synthetic construct]
gi|72003808	26878.4	95.5	15.48	6	fluorescent protein SYFP2 [synthetic construct]_x0001_gi|72003810|gb|AAZ65846.1| fluorescent protein SCFP1 [synthetic construct]
gi|72003806	26892.4	95.5	15.48	6	fluorescent protein mVenus [synthetic construct]
gi|72003812	26916.5	95.5	15.48	6	fluorescent protein SCFP2 [synthetic construct]
gi|72003814	26894.4	95.5	15.48	6	fluorescent protein SCFP3A [synthetic construct]
gi|81238213	26929.5	95.5	15.48	6	enhanced yellow fluorescent protein [Gene trapping Ds/T-DNA vector pNU393A1]_x0001_gi|81238220|gb|ABB59968.1| enhanced yellow fluorescent protein [Gene trapping Ds/T-DNA vector pNU393B2]_x0001_gi|81238227|gb|ABB59974.1| enhanced yellow flu
gi|1289375	26975.5	95.5	15.48	6	green fluorescent protein, S65T variant [Cloning vector phGFP-S65T]_x0001_gi|1899257|gb|AAB50135.1| green fluorescent protein, S65T variant [synthetic construct]_x0001_gi|47524499|gb|AAT34982.1| green fluorescent protein S65T variant [Expre
gi|7638257	26991.5	95.5	15.48	6	SRC1 interaction domain-EYFP fusion protein [synthetic construct]_x0001_gi|48995621|gb|AAT48431.1| yellow fluorescent protein [Cloning vector pSRalphahygroY]_x0001_gi|56553583|gb|AAV97917.1| EYFP [Cloning vector pSAT6-EYFP-N1]_x0001_gi|125976301|
gi|17224606	26839.3	95.5	15.48	6	green fluorescent protein CPGFP1 [synthetic construct]
gi|56553556	26994.6	95.5	15.48	6	citrine [Cloning vector pSAT6-Citrine-N1]
gi|62462066	26913.4	95.5	15.48	6	green fluorescent protein [synthetic construct]
gi|104716872	26919.5	95.5	15.48	6	ecfp fluorescence protein [Mini-Tn7 delivery vector pUC18T-mini-Tn7T-Gm-ecfp]_x0001_gi|104717021|gb|ABF74543.1| ecfp fluorescence protein [Mini-Tn7 delivery vector pUC18T-mini-Tn7T-Tp-ecfp]_x0001_gi|104717199|gb|ABF74555.1| ecfp fluoresce
gi|104716911	27005.6	95.5	15.48	6	eyfp fluorescence protein [Mini-Tn7 delivery vector pUC18T-mini-Tn7T-Gm-eyfp]_x0001_gi|104717071|gb|ABF74546.1| eyfp fluorescence protein [Mini-Tn7 delivery vector pUC18T-mini-Tn7T-Tp-eyfp]_x0001_gi|104717237|gb|ABF74558.1| eyfp fluoresce
gi|118405127	26939.4	95.5	15.48	6	sGFP protein [synthetic construct]
gi|119035842	26965.5	95.5	15.48	6	GFP [Expression vector pCeMM-NTAP(GS)-Gw]_x0001_gi|119035856|gb|ABL60860.1| GFP [Expression vector pCeMM-CTAP(SG)-Gw]_x0001_gi|138375582|gb|ABO76908.1| GFP [Expression vector pCeMM-NTAP(GS)]_x0001_gi|138375596|gb|ABO76911.1| GFP [Expression vec
gi|152955958	26835.3	95.5	15.48	6	Venus protein [Cloning vector pDH51-GW-YFP]_x0001_gi|157310063|emb|CAP04964.1| venus protein [Cloning vector pGBPGWY]_x0001_gi|157310075|emb|CAP04973.1| venus protein [Cloning vector pGHPGWY]_x0001_gi|157310087|emb|CAP04982.1| venus protein [C
gi|152955953	26775.3	95.5	15.48	6	Cerulean protein [Cloning vector pDH51-GW-CFP]_x0001_gi|157310055|emb|CAP04958.1| cerulean protein [Cloning vector pGBPGWC]_x0001_gi|157310067|emb|CAP04967.1| cerulean protein [Cloning vector pGHPGWC]_x0001_gi|157310079|emb|CAP04976.1| cerulea
gi|124264534	26850.3	95.5	15.48	6	fluorescent protein SGFP2(T65G) [synthetic construct]
gi|124264526	26908.4	95.5	15.48	6	fluorescent protein SGFP1 [synthetic construct]
gi|124264532	26893.4	95.5	15.48	6	fluorescent protein SGFP2(E222Q) [synthetic construct]
gi|124264536	26852.4	95.5	15.48	6	fluorescent protein SBFP1 [synthetic construct]
gi|124264530	26837.3	95.5	15.48	6	fluorescent protein SGFP2(206A) [synthetic construct]
gi|124264528	26894.4	95.5	15.48	6	fluorescent protein SGFP2 [synthetic construct]
gi|124264538	26838.3	95.5	15.48	6	fluorescent protein SBFP2 [synthetic construct]
gi|187370624	26967.5	95.5	15.48	6	monomeric super enhanced cyan fluorescent protein mseCFP [synthetic construct]
gi|225380234	26688.3	95.5	15.48	6	ultramarine fluorescent protein [synthetic construct]
gi|226331130	26832.4	95.5	15.48	6	mCerulean fluorescent protein [Cloning vector pNIGEL18]
gi|3891568	1.02537e+06	95.5	14.22	5	Chain A, Structure Of Yellow-Emission Variant Of Gfp_x0001_gi|3891569|pdb|1YFP|B Chain B, Structure Of Yellow-Emission Variant Of Gfp
gi|15667633	27259.8	95.5	15.35	6	codon-optimized GFPmut1 [Expression vector pTub-tel3 GFP3]_x0001_gi|15667635|dbj|BAB68314.1| codon-optimized GFPmut1 [Expression vector pTub-tel3 GFP4]
gi|57158241	27115.7	95.5	15.35	6	yellow fluorescent protein [Paramecium synthetic construct]
gi|206582017	1.0271e+06	95.5	15.35	6	Chain A, Structure Of The Yellow Fluorescent Protein Citrine Frozen At 1 Atmosphere Number 1: Structure 1 In A Series Of 26 High Pressure Structures_x0001_gi|206582018|pdb|3DPX|A Chain A, Structure Of The Yellow Fluorescent Protein Citr
gi|39654397	1.02544e+06	95.5	14.1	5	Chain A, Expansion Of The Genetic Code Enables Design Of A Novel "gold" Class Of Green Fluorescent Proteins_x0001_gi|39654398|pdb|1OXE|A Chain A, Expansion Of The Genetic Code Enables Design Of A Novel "gold" Class Of Green Fluorescent P
gi|28864238	27348	95.4	15.29	6	yellow fluorescent protein [Expression vector pBS-35S-YFP]_x0001_gi|62736923|gb|AAX97752.1| EYFP [Cloning vector pBS 35S attR-YFP]_x0001_gi|62736949|gb|AAX97774.1| EYFP [Binary vector pBin19 35S attR-YFP]_x0001_gi|87042832|gb|ABD16426.1| enhance
gi|87042818	27282.8	95.4	15.29	6	sGFP [Gateway adapted binary vector pCGTENG]_x0001_gi|87042822|gb|ABD16418.1| sGFP [Gateway adapted binary vector pCGTNG]_x0001_gi|87042827|gb|ABD16422.1| sGFP [Binary vector pCsGFPBT]
gi|149241869	1.02718e+06	95.4	15.29	6	Chain A, Spectroscopic And Structural Study Of The Heterotropic Linkage Between Halide And Proton Ion Binding To Gfp Proteins- E2(Gfp) Apo Form_x0001_gi|149242545|pdb|2O24|A Chain A, Spectroscopic And Structural Study Of The Heterotropi
gi|37654595	27349.9	95.4	15.23	6	yellow fluorescent protein [YFP Integration vector pSMUY2+]
gi|37654591	27263.8	95.4	15.23	6	cyan fluorescent protein [CFP Integration vector pSMUC2+]
gi|156106790	27477.1	95.4	15.23	6	enhanced yellow fluorescence protein [Plant expression vector pDuExAn1]
gi|115291372	27442	95.4	15.16	6	green fluorescent protein [synthetic construct]_x0001_gi|167651288|gb|ABZ91089.1| enhanced green fluorescent protein [Episomal vector pMARS-mODC-ZA]
gi|118200612	27600	95.4	15.16	6	BFP-A5 [synthetic construct]
gi|118200610	27704.2	95.4	15.16	6	BFP-azurite [synthetic construct]
gi|92918410	27513.1	95.4	15.1	6	enhanced green flurorescent protein [shRNA expression vector pSiRPG]
gi|1899161	27979.6	95.4	14.98	6	green fluorescent protein [synthetic construct]
gi|1899159	28025.6	95.4	14.98	6	green fluorescent protein [synthetic construct]
gi|30407701	27847.6	95.4	14.98	6	EGFP [BAC cloning vector pEBAC190G]
gi|37551795	27893.5	95.4	14.92	6	enhanced yellow fluorescent protein [Yellow H-Pelican YFP transformation vector]_x0001_gi|52631358|gb|AAU85108.1| eYFP [Yellow HI-Pelican Drosophila transposon vector]_x0001_gi|114199189|gb|ABI54179.1| enhanced yellow fluorescent protein [
gi|23821174	28269.9	95.4	14.8	6	cyan fluorescent protein [Cloning vector pDXA-CFP]
gi|23821178	28356	95.4	14.8	6	yellow fluorescent protein [Cloning vector pDXA-yFP]
gi|42741924	28309.9	95.4	14.8	6	green fluorescent protein [Expression vector pTH6nGFPc]
gi|42741927	28350	95.4	14.8	6	green fluorescent protein [Expression vector pTH6cGFPn]
gi|157041449	28139	95.4	14.8	6	enhanced green fluorescent protein (EGFP) [Reporter vector EGFP-3'UTR-alphaCaMKII]
gi|11513672	1.02666e+06	95.4	13.56	5	Chain A, Crystal Structure Of The Green Fluorescent Protein (Gfp) Variant Yfp-H148q With Two Bound Iodides_x0001_gi|11513674|pdb|1F0B|A Chain A, Crystal Structure Of The Green Fluorescent Protein (Gfp) Variant Yfp-H148q
gi|6730026	1.02659e+06	95.4	13.56	5	Chain A, Structure Of Yellow-Emission Variant Of Gfp
gi|157830280	1.02659e+06	95.4	13.56	5	Chain A, Blue Variant Of Green Fluorescent Protein
gi|2392316	1.02661e+06	95.4	13.56	5	Chain , Green Fluorescent Protein (Gfp) From Aequorea Victoria, Gln 80 Replaced With Arg_x0001_gi|5107579|pdb|1EMG|A Chain A, Green Fluorescent Protein (65-67 Replaced By Cro, S65t Substitution, Q80r)_x0001_gi|6137653|pdb|1C4F|A Chain A, Green
gi|28373440	1.02653e+06	95.4	13.56	5	Chain A, Crystal Structure Analysis Of A Dual-Wavelength Emission Green Fluorescent Protein Variant At Low Ph_x0001_gi|28373441|pdb|1JBZ|A Chain A, Crystal Structure Analysis Of A Dual-Wavelength Emission Green Fluorescent Protein Varian
gi|34809574	1.02655e+06	95.4	13.56	5	Chain A, Crystal Structure Analysis Of A Redox-Sensitive Green Fluorescent Protein Variant In A Reduced Form_x0001_gi|34809575|pdb|1JC0|B Chain B, Crystal Structure Analysis Of A Redox-Sensitive Green Fluorescent Protein Variant In A Red
gi|34811710	1.02664e+06	95.4	13.56	5	Chain A, The Oxidized State Of A Redox Sensitive Variant Of Green Fluorescent Protein_x0001_gi|34811711|pdb|1H6R|B Chain B, The Oxidized State Of A Redox Sensitive Variant Of Green Fluorescent Protein_x0001_gi|34811712|pdb|1H6R|C Chain C, The
gi|42543381	1.02655e+06	95.4	13.56	5	Chain A, S65t Q80r Y145c Green Fluorescent Protein (Gfp) Ph 8.5
gi|42543412	1.02655e+06	95.4	13.56	5	Chain A, S65t Q80r Y145c T203c Green Fluorescent Protein (Gfp) Ph 8.5
gi|42543379	1.02661e+06	95.4	13.56	5	Chain A, S65t Q80r T203c Green Fluorescent Protein (Gfp) Ph 8.5_x0001_gi|42543380|pdb|1Q4D|A Chain A, S65t Q80r T203c Green Fluorescent Protein (Gfp) Ph 5.5
gi|48425578	1.02657e+06	95.4	13.56	5	Chain A, Enhanced Green Fluorescent Protein Containing The Y66l Substitution_x0001_gi|71042147|pdb|1Z1P|A Chain A, Y66l Variant Of Enhanced Green Fluorescent Protein With 412- Nm Absorbing Chromophore_x0001_gi|71042148|pdb|1Z1Q|A Chain A, Y66l
gi|49258764	2.02627e+06	95.4	13.56	5	Chain A, Probing The Role Of Tryptophans In Aequorea Victoria Green Fluorescent Proteins With An Expanded Genetic Code
gi|1277124	26662.1	95.4	13.56	5	gfp [Cloning vector pFW_GFP]
gi|93278674	2.0265e+06	95.4	13.56	5	Chain B, Rogfp1-R7. Cystal Structure Analysis Of A Rate-Enhanced Variant Of Redox-Sensitive Green Fluorescent Protein In The Oxidized Form
gi|93278673	1.02663e+06	95.4	13.56	5	Chain A, Rogfp1-R7. Cystal Structure Analysis Of A Rate-Enhanced Variant Of Redox-Sensitive Green Fluorescent Protein In The Oxidized Form
gi|152148993	1.02658e+06	95.4	13.56	5	Chain A, Crystal Structure Of A Green Fluorescent Protein S65tH148N At Ph 5_x0001_gi|152148994|pdb|2DUH|A Chain A, Crystal Structure Of A Green Fluorescent Protein Variant S65tH148N AT PH 9.5
gi|152148991	1.02659e+06	95.4	13.56	5	Chain A, Crystal Structure Of A Green Fluorescent Protein Variant S65tH148D AT PH 10_x0001_gi|152148992|pdb|2DUF|A Chain A, Crystal Structure Of A Green Fluorescent Protein Variant S65tH148D AT PH 5.6_x0001_gi|152148995|pdb|2DUI|A Chain A, Cr
gi|167744941	1.02662e+06	95.4	13.56	5	Chain A, GfpS205V MUTANT_x0001_gi|167744942|pdb|2QLE|B Chain B, GfpS205V MUTANT_x0001_gi|167744943|pdb|2QLE|C Chain C, GfpS205V MUTANT_x0001_gi|167744944|pdb|2QLE|D Chain D, GfpS205V MUTANT
gi|50365745	28243.9	95.4	14.74	6	IcfP [Cloning vector pICFP]
gi|50365747	28330	95.4	14.74	6	IyfP [Cloning vector pIYFP]
gi|59800243	28294.9	95.4	14.74	6	GFP-LVA [Expression vector pLuxR-wt]_x0001_gi|59800248|gb|AAX07429.1| GFP-LVA [Expression vector pHTSUB-105]_x0001_gi|60594755|gb|AAX29979.1| green fluorescent protein LVA [Cloning vector pHTSUB-106]
gi|157830967	1.02664e+06	95.4	13.5	5	Chain A, Green Fluorescent Protein From Aequorea Victoria, Mutant_x0001_gi|157834929|pdb|2EMD|A Chain A, Green Fluorescent Protein From Aequorea Victoria, Mutant_x0001_gi|157834930|pdb|2EMN|A Chain A, Green Fluorescent Protein From Aequorea V
gi|2392317	1.02662e+06	95.4	13.5	5	Chain A, Green Fluorescent Protein From Aequorea Victoria, Mutant_x0001_gi|2392318|pdb|1EMC|B Chain B, Green Fluorescent Protein From Aequorea Victoria, Mutant_x0001_gi|2392319|pdb|1EMC|C Chain C, Green Fluorescent Protein From Aequorea Victori
gi|157830964	1.02662e+06	95.4	13.5	5	Chain A, Green Fluorescent Protein From Aequorea Victoria, Mutant_x0001_gi|157834931|pdb|2EMO|A Chain A, Green Fluorescent Protein From Aequorea Victoria, Mutant
gi|198078161	26767.2	95.4	13.5	5	green fluorescent protein [Cloning vector pDM313]
gi|62736903	28542.3	95.4	14.68	6	EYFP [Cloning vector pBS 35S YFP-attR]_x0001_gi|62736944|gb|AAX97770.1| EYFP [Binary vector pBin19 35S YFP-attR]
gi|28864250	28171.9	95.4	14.68	6	yellow fluorescent protein [Expression vector pBS-35S-YFP-Ala]
gi|145308270	28477.2	95.4	14.68	6	enhanced green fluorescent protein [Gateway binary vector pKPWGF2]
gi|221229273	27940.5	95.4	14.68	6	GFP [Neurospora expression vector pCCG::N-GFP]
gi|11093859	26894.4	95.4	13.45	5	GFP [Promoter probe vector pPROBE-NT]_x0001_gi|11093864|gb|AAG29458.1|AF286454_1 GFP [Promoter probe vector pPROBE-NT']_x0001_gi|11093869|gb|AAG29462.1|AF286455_1 GFP [Promoter probe vector pPROBE-gfp[tagless]]_x0001_gi|11093874|gb|AAG
gi|1942689	26854.3	95.4	13.45	5	Chain A, Structure Of Green Fluorescent Protein_x0001_gi|1942690|pdb|1GFL|B Chain B, Structure Of Green Fluorescent Protein
gi|1360632	26884.3	95.4	13.45	5	green fluorescent protein [unidentified]
gi|55724863	26937.5	95.4	13.45	5	green fluorescent protein mut3.1 [Cloning vector pRU1097]_x0001_gi|55724895|emb|CAH64923.1| green fluorescent protein mut3.1 [Cloning vector pRU1156]_x0001_gi|55724899|emb|CAH64926.1| green fluorescent protein mut3.1 [Cloning vector pRU12
gi|2981191	26896.4	95.4	13.45	5	green fluorescent protein [Expression vector pYZ3N-GFP]_x0001_gi|34398331|gb|AAQ67238.1| Gfp-mut2 [Transposon delivery vector pUT-miniTn5-gfp-tet]_x0001_gi|70955064|gb|AAZ16159.1| green fluorescent protein [synthetic construct]
gi|46850472	26930.4	95.4	13.45	5	green fluorescent protein [Cloning vector pHyVec3]_x0001_gi|88174977|gb|ABD39512.1| green fluorescent protein [Cloning vector pHyVec4]
gi|11321067	26944.4	95.4	13.45	5	yellow fluorescent protein yfp [yfp marker plasmid pWM1008]_x0001_gi|11321077|gb|AAG34044.1| yellow fluorescent protein yfp [yfp marker plasmid pWM1011]_x0001_gi|240017710|gb|ACS44346.1| yellow fluorescent protein [synthetic construct]
gi|6272583	26914.4	95.4	13.45	5	green fluorescent protein [Integration vector mini-CTX-GFP]_x0001_gi|26892275|gb|AAN86140.1|AF324408_1 green fluorescence protein [Azotobacter vinelandii]_x0001_gi|1842445|gb|AAB47852.1| green fluorescent protein [synthetic constr
gi|3319298	26961.4	95.4	13.45	5	ecliptic pHluorin [synthetic construct]
gi|1848287	26844.2	95.4	13.45	5	modified green fluorescent protein GFP5 [synthetic construct]
gi|12831190	26864.4	95.4	13.45	5	GFP [Plant DNA excision vector pX6-GFP]
gi|26892271	26887.3	95.4	13.45	5	green fluorescence protein [Azotobacter vinelandii]
gi|45479290	26941.4	95.4	13.45	5	superecliptic pHluorin [synthetic construct]
gi|80979135	26794.2	95.4	13.45	5	green fluorescent protein variant [synthetic construct]
gi|80979137	26698.2	95.4	13.45	5	cyan fluorescent protein variant [synthetic construct]
gi|126145181	26882.4	95.4	13.45	5	g3 green fluorescent protein [Gateway binary vector pGWB550]_x0001_gi|126145186|dbj|BAF47674.1| g3 green fluorescent protein [Gateway binary vector pGWB551]_x0001_gi|126149183|dbj|BAF47533.1| g3 green fluorescent protein [Gateway binary
gi|198078158	26898.4	95.4	13.45	5	green fluorescent protein [Cloning vector 1-21]
gi|129560436	28595.4	95.4	14.62	6	green fluorescent protein [Retroviral vector pCX4gfp*]
gi|225675558	28818.5	95.4	14.62	6	GFP [Transformation vector pTtag]
gi|14719453	1.02698e+06	95.4	13.39	5	Chain A, Crystal Structure Of Citrine, An Improved Yellow Variant Of Green Fluorescent Protein
gi|27372525	26971.4	95.4	13.39	5	enhanced green flourescent protein [Transcription interference insert pKGG]
gi|10441228	26985.4	95.4	13.39	5	GFPS [synthetic construct]
gi|3377683	26983.5	95.4	13.39	5	green fluorescent protein [Cloning vector pAVA319]
gi|124361323	29125	95.4	14.57	6	enhanced green fluorescent protein [Cloning vector pLvCmvLacZ.Gfp]_x0001_gi|124361328|gb|ABN09232.1| enhanced green fluorescent protein [Cloning vector pLvCmvMyocardin.Gfp]
gi|226910492	28575.2	95.4	14.51	6	GFP-SsrA(SP) [synthetic construct]
gi|28864247	28499.4	95.4	14.45	6	yellow fluorescent protein [Expression vector pBS-35S-Ala-YFP]
gi|887957	27259.7	95.4	13.22	5	green fluorescent protein [Cloning vector pGFP-1]_x0001_gi|887959|gb|AAA69544.1| green fluorescent protein [Cloning vector pGFP-N3]_x0001_gi|887961|gb|AAA69548.1| green fluorescent protein [Cloning vector pGFP-N1]_x0001_gi|887963|gb|AAA69554.1| gr
gi|94429013	28749.4	95.4	14.4	6	green fluorescent protein [synthetic construct]
gi|205363913	27275.7	95.4	13.17	5	green fluorescent protein [Expression vector pHC60]
gi|188485337	27430.9	95.4	13.11	5	mGFP [Expression vector pSH476]
gi|13928062	27697.1	95.4	13.01	5	green fluorescent protein [Integration vector pSMRG2+]_x0001_gi|13928065|emb|CAC37688.1| green fluorescent protein [Integration vector pSMUG2+]
gi|219718119	27487.9	95.4	13.01	5	GFP5 [Gateway Entry vector pWY102]
gi|53987100	27795.5	95.4	12.96	5	green fluorescent protein [Cloning vector p713-909]
gi|23821182	29303.9	95.4	14.12	6	cyan fluorescent protein [Cloning vector pDXA-CFP-MCS]
gi|23821186	29390	95.4	14.12	6	yellow fluorescent protein [Cloning vector pDXA-YFP-MCS]
gi|125381306	29466.2	95.4	14.07	6	gfp/ova fusion [Promoter-trap vector pMW82]
gi|55724871	28043.6	95.4	12.85	5	green fluorescent protein mut3.1 (unstable derivative ASV) [Cloning vector pRU1101]
gi|55724867	28027.6	95.4	12.85	5	green fluorescent protein mut3.1 (unstable derivative AAV) [Cloning vector pRU1099]
gi|55724865	28041.6	95.4	12.85	5	green fluorescent protein mut3.1 (unstable derivative LAA) [Cloning vector pRU1098]
gi|55724869	28069.6	95.4	12.85	5	green fluorescent protein mut3.1 (unstable derivative LVA) [Cloning vector pRU1100]
gi|23821194	29202.8	95.4	14.02	6	yellow fluorescent protein [Cloning vector pDXA-MCS-YFP]
gi|11344879	29647.4	95.4	14.02	6	enhanced green fluorescent protein 3 [N-terminal GFP fusion vector pUG34]_x0001_gi|11344904|gb|AAG34539.1| enhanced green fluorescent protein 3 [N-terminal GFP fusion vector pUG36]
gi|146743453	29863.8	95.4	14.02	6	EGFP fusion protein [Plant transit expression vector pSAT6-EGFP-Cb]
gi|11036940	29371	95.4	13.96	6	enhanced green fluorescent protein [Cloning vector pdeltaE1sp1A(CMV-GFP)]_x0001_gi|1377915|gb|AAB02576.1| enhanced green fluorescent protein [Cloning vector pEGFP-C1]_x0001_gi|146743450|gb|ABQ43174.1| EGFP fusion protein [Plant t
gi|1373316	29908.8	95.4	13.96	6	Enhanced Green Fluorescent Protein [Cloning vector pEGFP-C2]
gi|1373319	29948.9	95.4	13.96	6	Enhanced Green Fluorescent Protein [Cloning vector pEGFP-C3]
gi|7453572	29256	95.4	13.96	6	enhanced GFP variant [Cloning vector pEGAD]
gi|15149221	29981.6	95.4	13.96	6	MCS-GFP309-His tag fusion [Expression vector pBGH]
gi|11093889	28253.8	95.4	12.75	5	GFP[ASV] [Promoter probe vector pPROBE-gfp[ASV]]_x0001_gi|11093894|gb|AAG29482.1|AF286460_1 GFP[ASV] [Promoter probe vector pPROBE'-gfp[ASV]]
gi|7638075	28352.9	95.4	12.75	5	mGFP5*, hexaHis tagged [Binary vector pCAMBIA-1302]
gi|11093899	28279.9	95.4	12.75	5	GFP[LVA] [Promoter probe vector pPROBE-gfp[LVA]]_x0001_gi|11093904|gb|AAG29490.1|AF286462_1 GFP[LVA] [Promoter probe vector pPROBE'-gfp[LVA]]
gi|11093879	28237.8	95.4	12.75	5	GFP[AAV] [Promoter probe vector pPROBE-gfp[AAV]]_x0001_gi|11093884|gb|AAG29474.1|AF286458_1 GFP[AAV] [Promoter probe vector pPROBE'-gfp[AAV]]
gi|146743456	29956.8	95.4	13.91	6	EGFP fusion protein [Plant transit expression vector pSAT6-EGFP-Cc]
gi|23821190	29673.3	95.4	13.86	6	yellow fluorescent protein [Cloning vector pDXA-YFP-NotI]
gi|145834037	28344.9	95.4	12.65	5	green fluorescent protein [Cloning vector pHyVec7]
gi|45758345	28513.2	95.4	12.6	5	actin/green fluorescent protein fusion protein [Cloning vector pHyVec1]_x0001_gi|86559505|gb|ABD04150.1| actin/EGFP fusion protein [Expression vector hoTG]
gi|161172181	1.02834e+06	95.4	12.6	5	Chain A, X-Ray Structure Of Cerulean Gfp: A Tryptophan-Based Chromophore Useful For Fluorescence Lifetime Imaging
gi|91317821	30076.3	95.4	13.75	6	SS(TOB)-EGFP fusion protein [synthetic construct]
gi|149393496	30384.2	95.3	13.7	6	VisGreen green fluorescent protein [synthetic construct]
gi|7638255	30722.8	95.3	13.55	6	PBP interaction domain-EYFP fusion protein [synthetic construct]
gi|13528553	30924.6	95.3	13.55	6	GFP fusion protein [Cloning vector pTX-GFP]_x0001_gi|13549396|gb|AAG00925.2|AF269235_3 green fluorescent protein [Cloning vector pDXA-GFP2]
gi|13161001	29361.3	95.3	12.31	5	lacZ-GFP fusion protein [Cloning vector pFH2191]
gi|157086879	30738.7	95.3	13.45	6	FLAG-OLLAS-tagged enhanced green fluorescent protein [synthetic construct]
gi|12237307	31897.9	95.3	13.36	6	nuclear eGFP [Stinger GFP transformation vector]_x0001_gi|12237312|gb|AAG49428.1| nuclear eGFP [H-Stinger GFP transformation vector]
gi|1848289	29724.6	95.3	12.17	5	modified green fluorescent protein GFP5-ER [synthetic construct]
gi|1842447	29794.8	95.3	12.17	5	modified green fluorescent protein GFP-ER [synthetic construct]
gi|158939741	29750.7	95.3	12.17	5	mGFP5-ER [Binary vector pCLEAN-G147]_x0001_gi|158939745|gb|ABW84177.1| mGFP5-ER [Binary vector pCLEAN-G146]_x0001_gi|158939749|gb|ABW84180.1| mGFP5-ER [Binary vector pCLEAN-G144]_x0001_gi|158939753|gb|ABW84183.1| mGFP5-ER [Binary vector pCLEAN-
gi|218057415	29776.8	95.3	12.17	5	red shifted green fluorescent protein [synthetic construct]
gi|1019894	29327.9	95.3	12.12	5	green fluorescent protein, S65T variant [Cloning vector pS65T-C1]
gi|1019891	29252.9	95.3	12.12	5	green fluorescent protein, RSGFP4 variant [Cloning vector pRSGFP-C1]
gi|632527	29313.9	95.3	12.12	5	green fluorescent protein [Cloning vector pGFP-C1]
gi|632530	29851.7	95.3	12.12	5	green fluorescent protein [Cloning vector pGFP-C2]
gi|632521	29891.7	95.3	12.12	5	green fluorescent protein [Cloning vector pGFP-C3]
gi|126143020	32465.6	95.3	13.17	6	nuclear eGFP [Reporter vector Ganesh-G1]
gi|114199187	32303.4	95.3	13.12	6	nuclear venus YFP [Transformation vector nvYFP w-]
gi|237652124	30099.1	95.3	11.81	5	green fluorescent protein [Transient expression vector pX-DG]_x0001_gi|237652172|gb|ACR08780.1| green fluorescent protein [Binary vector pCX-DG]
gi|110612128	31813.4	95.3	12.94	6	pBI-SS(Tom)(VP)11-EGFP [synthetic construct]
gi|157086877	32295.5	95.3	12.85	6	enhanced green fluorescent protein/OT-1 antigen/OLLAS-tag fusion protein [synthetic construct]
gi|6453571	30857.8	95.3	11.68	5	green flourescent protein [Integration vector pSMUG+]
gi|76667908	31060.1	95.3	11.64	5	cyan fluorescent protein fusion protein [Cloning vector p3216PCbeta]
gi|167651285	32407.6	95.3	12.76	6	EGFP-mODC [Episomal vector pMARS-mODC-AZ]
gi|118405125	32577.9	95.3	12.63	6	Chimeric preFed3-GFP protein [synthetic construct]
gi|57639621	34596.7	95.2	12.09	6	green fluorescent protein with N-terminal signal peptide and C-terminal GPI anchor signal sequence from merozoite surface protein 1 [Expression vector pTGPI-GFP]
gi|154268992	35591.7	95.2	11.75	6	eGFP [Cloning vector BSNG]
gi|154269000	35641.8	95.2	11.75	6	eYFP [Cloning vector BSNY]
gi|154268998	35555.7	95.2	11.75	6	eCFP [Cloning vector BSNC]
gi|11023187	35633.7	95.2	11.64	6	Cox8ND6gfp fusion protein [synthetic construct]
gi|93359272	35845.4	95.1	11.14	6	pBI-SS(Tob)(SP)32-EGFP [synthetic construct]
gi|91317843	36313.2	95.1	11.04	6	(GAGP)3-EGFP fusion protein [synthetic construct]
gi|93359268	36297.3	95.1	11.04	6	pBI-SS(Tob)(SPPP)15-EGFP [synthetic construct]
gi|193884060	38603.1	95.1	10.85	6	GFP-FDC.SP fusion protein [Cloning vector pInSRT-GFPhFDC.SP]
gi|11023185	39854.3	95	10.42	6	Cox8atp6gfp fusion protein [synthetic construct]
gi|110612124	37289.5	95	10.39	6	pBI-SS(Tom)(AP)51-EGFP [synthetic construct]
gi|189473449	40118.9	95	10.28	6	N-EGFP/v-myc myelocytomatosis viral oncogene-like protein fusion protein [synthetic construct]
gi|93359270	38802.3	95	10.25	6	pBI-SS(Tob)(SPPPP)18-EGFP [synthetic construct]
gi|158327647	40343	95	10.11	6	histone H2A-EYFP fusion protein [Reporter vector pYH2A]
gi|56783179	41334.2	95	10	6	pIN-G [Trafficking reporter vector pIN-G]
gi|189473429	41965.6	95	9.97	6	N-EGFP/biogenesis of lysosome-related organelles complex-1 subunit 1 fusion protein [synthetic construct]
gi|158327643	41386.1	95	9.92	6	histone H2B-ECFP fusion protein [Reporter vector pCH2B]
gi|122920877	1.04065e+06	94.9	8.84	5	Chain A, Yellow Fluorescent Protein- Glutaredoxin Fusion Protein
gi|110645055	41950.3	94.9	9.69	6	BSD-FLAG-GFP [Cloning vector pBSD-GFP-INT-attP]
gi|189473431	42528.2	94.9	9.69	6	N-EGFP/SNAP-associated fusion protein [synthetic construct]
gi|144369235	42958.9	94.9	9.66	6	EGFP-Bsr [Cloning vector piMARK]
gi|87042808	43366.9	94.9	9.41	6	HTA6-EYFP [Gateway adapted binary vector pFYTAG]
gi|87042811	43301.8	94.9	9.41	6	HTA6-sGFP [Gateway adapted binary vector pCGTAG]
gi|226910497	26076.2	94.8	14.22	5	Gfp-SsrA(EC) [synthetic construct]
gi|13936438	45603	94.8	9.02	6	45 kDa IGFI-GFP fusion protein [synthetic construct]_x0001_gi|14150457|gb|AAK54502.1|AF267909_1 45 kDa SIGFI-GFP fusion protein [synthetic construct]
gi|223005744	46072.7	94.8	8.98	6	recombinant T-cell epitopes of Cry j 1 allergen [synthetic construct]
gi|29150153	46668.4	94.8	8.89	6	calcium-sensing GFP analog [synthetic construct]
gi|189473433	47397.9	94.8	8.85	6	N-EGFP/pallidin-like protein fusion protein [synthetic construct]
gi|206572017	48457.6	94.7	8.53	6	secEPO-GFP [synthetic construct]
gi|26892269	26902.3	94.7	11.76	4	green fluorescence protein [Azomonas agilis]
gi|206572019	48943.1	94.7	8.45	6	SP(EPO)-EPO(Nat)-GFP [synthetic construct]
gi|206572021	49433.6	94.7	8.39	6	SP(Tob)-EPO(Nat)-GFP [synthetic construct]
gi|12231523	51945.7	94.6	8.06	6	SooQI-507GFP fusion protein [synthetic construct]_x0001_gi|14150459|gb|AAK54503.1|AF267910_1 48 kDa IGF-II fusion protein [synthetic construct]
gi|110808578	51665.7	94.6	8.01	6	fungal-optimized enhanced green fluorescent protein/peroxisomal membrane protein A fusion protein [synthetic construct]
gi|189473441	51874.2	94.6	7.97	6	N-EGFP/BCL2-associated X fusion protein [synthetic construct]
gi|110612126	49673.2	94.6	7.94	6	pBI-SS(Tom)(TP)101-EGFP [synthetic construct]
gi|187370622	52538.4	94.6	7.94	6	photoconvertible fluorescent protein Phamret [synthetic construct]
gi|172053656	51766.5	94.6	7.84	6	GFP2APuro fusion protein [Cloning vector L071 RRI-Green]
gi|47524502	51061.7	94.5	7.81	6	histone H1/green fluorescent protein S65T variant fusion protein [Expression vector pMF280]
gi|61097807	51647.5	94.5	7.79	6	synthetic MSAKIT-EGFP [synthetic construct]
gi|61097803	51275.6	94.5	7.71	6	synthetic MSAH2K-EGFP [synthetic construct]
gi|94411311	53323.6	94.5	7.71	6	His-6-tagged G-CaMP1.6 [synthetic construct]
gi|170791211	54248.4	94.5	7.69	6	MT1-MMP FRET probe protein [synthetic construct]
gi|124365235	53353.4	94.5	7.58	6	GFP-aequorin fusion protein [synthetic construct]
gi|60101689	55631.9	94.5	7.46	6	GFP-DsRed fusion protein [Dual fluorescent protein cloning vector pGRFP]
gi|61097805	53859.1	94.4	7.43	6	synthetic FSAKIT-EGFP [synthetic construct]
gi|61097801	53487.3	94.4	7.36	6	synthetic FSAH2K-EGFP [synthetic construct]
gi|2331242	56014.2	94.4	7.34	6	fluorescent neomycin phosphotransferase fusion protein [synthetic construct]
gi|14571867	58180.6	94.4	7.23	6	IGFII-GFP fusion protein [synthetic construct]
gi|13094142	56096.3	94.3	6.32	5	red-shift green fluorescent protein-fused neomycin phosphotransferase [Cloning vector pLCPVRGNR104]
gi|134260421	56522.8	94.3	6.31	5	GFPNeo fusion protein [Cloning vector pEFBOS-IRESGFPNeo]
gi|7638253	58167.5	94.3	7.07	6	ECFP-retinoic acid receptor ligand binding domain fusion protein [synthetic construct]
gi|14571865	58701.1	94.3	7.03	6	SIGF1-GFP fusion protein [synthetic construct]
gi|46850193	58516.2	94.3	7.02	6	gfp/neomycin phosphotransferase fusion protein [Cloning vector pUC-gfp-neo]
gi|27542785	1.05973e+06	94.3	6.93	6	PAP2A-GFP fusion protein [synthetic construct]
gi|14161269	60607.6	94.2	6.79	6	secretory IgCEPUS-GFP fusion protein [synthetic construct]_x0001_gi|14161271|gb|AAK54683.1|AF271618_1 secretory IgCEPUS-GFP fusion protein [synthetic construct]
gi|7638249	61516.8	94.2	6.76	6	ECFP-estrogen receptor ligand binding domain fusion protein [synthetic construct]
gi|46850195	60870	94.2	6.74	6	lacZ/gfp/neomycin phosphotransferase fusion protein [Cloning vector pUC-gfp-neo]
gi|27542787	61845.3	94.2	6.72	6	wunen-nonfunctional GFP fusion protein [synthetic construct]
gi|170660062	62259.8	94.2	6.72	6	N-EGFP/NANOG homeobox fusion protein [synthetic construct]
gi|189314004	61714.1	94.2	6.68	6	channel rhodopsin-2-GFP [synthetic construct]
gi|167412534	63290.1	94.2	6.68	6	luciferase/green fluorescent protein fusion protein [Vaccinia virus GLV-1h68]
gi|42718272	62777.7	94.2	6.65	6	histone h3/lys9 methylation reporter fusion protein [synthetic construct]
gi|42718274	63114.5	94.2	6.6	6	histone h3/lys27 methylation reporter fusion protien [synthetic construct]
gi|189473435	63766.5	94.2	6.6	6	N-EGFP/eukaryotic translation initiation factor 2 subunit 1 alpha fusion protein [synthetic construct]
gi|25988674	64210.4	94.1	6.4	6	lysosomal cysteine proteinase cathepsin B/green fluorescent protein EGFP fusion protein [synthetic construct]
gi|17980549	66011.7	94	8.02	6	EGF-receptor reporter [synthetic construct]
gi|17980551	66629.3	94	6.26	6	Src reporter [synthetic construct]
gi|67043724	64528	94	6.24	6	green fluorescent protein-paired-box gene 9 fusion protein [Expression vector pEGFP-Pax9]
gi|62865585	65730.3	94	6.21	6	fusion Ble/GFP/delAPHVIII protein [synthetic construct]
gi|57791685	67428.2	94	6.2	6	Src reporter [synthetic construct]
gi|33867385	67693.9	94	6.16	6	rod transducin alpha subunit/green fluorescent protein fusion protein [synthetic construct]
gi|157837286	69382	93.9	7.63	6	reporter of ZAP-70 activity fusion protein [synthetic construct]
gi|189473447	69191.1	93.9	5.93	6	N-EGFP/UDP-Gal:betaGlcNAc beta 1,3-galactosyltransferase polypeptide 4 fusion protein [synthetic construct]
gi|50507918	73380.7	93.8	8.12	7	yellow cameleon 4.60 [synthetic construct]
gi|227343653	1.02545e+06	93.8	14.47	5	Chain A, Green Fluorescent Protein: Cyclized-Only Intermediate Of Chromophore Maturation In The Q183e Variant
gi|227343655	1.02542e+06	93.8	14.47	5	Chain A, Mature Q183e Variant Of Green Fluorescent Protein Chromophore
gi|122058454	72125.1	93.7	5.71	6	VenusGFP-Vps36 transgene fusion protein [synthetic construct]
gi|11513641	1.0264e+06	93.7	13.98	5	Chain A, Green Fluorescent Protein Mutant F99s, M153t And V163a_x0001_gi|11513642|pdb|1B9C|B Chain B, Green Fluorescent Protein Mutant F99s, M153t And V163a_x0001_gi|11513643|pdb|1B9C|C Chain C, Green Fluorescent Protein Mutant F99s, M153t And
gi|178847038	1.02649e+06	93.7	13.98	5	Chain A, Crystal Structure Of L42h V224h Design Intermediate For Gfp Metal Ion Reporter
gi|227343654	1.02643e+06	93.7	13.98	5	Chain A, Cyclized-Dehydrated Intermediate Of Gfp Variant Q183e In Chromophore Maturation
gi|20664224	1.0264e+06	93.7	13.92	5	Chain A, Crystal Structure Of An Apo Green Fluorescent Protein Zn Biosensor_x0001_gi|20664227|pdb|1KYR|A Chain A, Crystal Structure Of A Cu-Bound Green Fluorescent Protein Zn Biosensor_x0001_gi|20664230|pdb|1KYS|A Chain A, Crystal Structure Of
gi|37928121	1.0265e+06	93.7	13.92	5	Chain A, Crystal Structure Of The Cyclized S65g Y66g Gfp Variant_x0001_gi|93279817|pdb|2FZU|A Chain A, Reduced Enolate Chromophore Intermediate For Gfp Variant_x0001_gi|99032395|pdb|2G6E|A Chain A, Structure Of Cyclized F64l S65a Y66s Gfp Vari
gi|61680686	1.02645e+06	93.7	13.92	5	Chain A, Cyclized, Non-Dehydrated Post-Translational Product For S65a Y66s H148g Gfp Variant
gi|61680691	1.02653e+06	93.7	13.92	5	Chain A, Cyclized Post-Translational Product For S65a Y66s (Gfphal) Green Fluorescent Protein Variant_x0001_gi|145579504|pdb|2HGD|A Chain A, Structure Of S65a Y66f Gfp Variant With An Oxidized Chromophore
gi|4204724	26762.2	93.7	13.92	5	green fluorescent protein [Cloning vector pGreenscript I]_x0001_gi|4204726|gb|AAD11477.1| green fluorescent protein [Cloning vector pGreen 18]_x0001_gi|4204728|gb|AAD11478.1| green fluorescent protein [Cloning vector pGreen 19]
gi|93279786	1.02642e+06	93.7	13.92	5	Chain A, Reduced Enolate Chromophore Intermediate For Y66h Gfp Variant
gi|145579505	1.02647e+06	93.7	13.92	5	Chain A, Structure Of S65a Y66f E222a Gfp Variant After Cyclization And Carbon-Carbon Bond Cleavage
gi|50507914	73382.7	93.7	5.67	6	yellow cameleon 2.60 [synthetic construct]
gi|50507916	73381.7	93.7	5.67	6	yellow cameleon 3.60 [synthetic construct]
gi|94471597	73286.5	93.7	5.67	6	calcium sensor cameleon D3cpv [synthetic construct]
gi|94471595	73322.6	93.7	5.67	6	calcium sensor cameleon D2cpv [synthetic construct]
gi|94471599	73315.5	93.7	5.67	6	calcium sensor cameleon D4cpv [synthetic construct]
gi|11692753	26875.4	93.7	13.87	5	green fluorescent protein mutant 2 [synthetic construct]_x0001_gi|77994164|gb|ABB13467.1| green fluorescent protein mutant 2 [Mini-Tn7 delivery vector pUC18R6K-mini-Tn7T-Gm-PlacPflaAgfpmut2]_x0001_gi|226910508|gb|ACO90429.1| GFP
gi|155663	26920.3	93.7	13.87	5	green-fluorescent protein [Aequorea victoria]
gi|606384	26893.4	93.7	13.87	5	green-fluorescent protein [Aequorea victoria]
gi|634009	26950.4	93.7	13.87	5	green fluorescent protein [Aequorea victoria]
gi|157879831	26597.9	93.7	13.87	5	Chain A, Anaerobic Precylization Intermediate Crystal Structure For S65g Y66g Gfp Variant
gi|61680648	26727.1	93.7	13.81	5	Chain A, Uncyclized Precursor Structure Of S65a Y66s G67a Gfp Variant
gi|61680646	26656.9	93.7	13.81	5	Chain A, Uncyclized Precursor Structure Of S65g Y66s V68g Gfp Variant_x0001_gi|61680647|pdb|1YHG|B Chain B, Uncyclized Precursor Structure Of S65g Y66s V68g Gfp Variant
gi|154268996	74833.5	93.7	5.61	6	eGFP/hGIRK4 [Cloning vector BSNG-hG4]
gi|10281477	29263.1	93.6	12.64	5	mutant green fluorescent protein [Cloning vector pGreen A18]
gi|122935092	76727.8	93.6	5.51	6	ENR-GFP [Cloning vector pLN-ENR-GFP]
gi|10281479	29459.3	93.6	12.6	5	mutant green fluorescent protein [Cloning vector pGreen A19]
gi|30089004	76835.3	93.6	5.49	6	avermectin-sensitive chloride channel GluCl beta/cyan fluorescent protein fusion [synthetic construct]
gi|94471601	75637.2	93.6	5.49	6	calcium sensor cameleon lynD3cpv [synthetic construct]
gi|14861205	29752.7	93.6	12.36	5	alpha-amylase GFP fusion protein [Expression vector pFL746]
gi|7638251	76855.9	93.6	6.2	7	ECFP-retinoic acid receptor alpha fusion protein [synthetic construct]
gi|225734277	1.02564e+06	93.6	12.23	4	Chain A, Non Photoactivated State Of Pa-Gfp_x0001_gi|225734278|pdb|3GJ1|B Chain B, Non Photoactivated State Of Pa-Gfp_x0001_gi|225734279|pdb|3GJ1|C Chain C, Non Photoactivated State Of Pa-Gfp_x0001_gi|225734280|pdb|3GJ1|D Chain D, Non Photoactivate
gi|55724883	26504.8	93.6	11.86	4	green fluorescent protein UV [Cloning vector pRU1064]
gi|200827406	26498.8	93.6	11.86	4	green fluorescent protein UV5 [synthetic construct]_x0001_gi|200827412|dbj|BAG71047.1| green fluorescent protein UV5 [synthetic construct]_x0001_gi|200827420|dbj|BAG71049.1| green fluorescent protein UV5 [synthetic construct]_x0001_gi|23958269
gi|227437139	26664.9	93.6	11.81	4	soluble-modified green fluorescent protein [Expression vector pRC100]
gi|164431673	77130.2	93.6	5.43	6	truncated beta-glucuronidase fusion protein [synthetic construct]
gi|1490529	26796.1	93.6	11.76	4	GFPuv [Cloning vector pGFPuv]_x0001_gi|1619749|gb|AAB16957.1| soluble-modified green fluorescent protein [Cloning vector pSMGFP]_x0001_gi|2281526|gb|AAB65663.1| green fluorescent protein [Cloning vector pGFPCR]_x0001_gi|4007037|emb|CAA10279.1| gr
gi|55724861	26776.1	93.6	11.76	4	green fluorescent protein plus [Cloning vector pRU1701]
gi|1619751	26810.2	93.6	11.76	4	soluble-modified red-shifted green fluorescent protein [Cloning vector pSMRSGFP]
gi|1619753	26770.1	93.6	11.76	4	soluble-modified blue fluorescent protein [Cloning vector pSMBFP]_x0001_gi|240017714|gb|ACS44348.1| blue fluorescent protein [synthetic construct]
gi|184186048	26790.2	93.6	11.76	4	green fluorescent protein UV5 [synthetic construct]_x0001_gi|200827384|dbj|BAG71039.1| green fluorescence protein [synthetic construct]
gi|83778985	26847.2	93.6	11.72	4	Green fluorescent protein [Cloning vector pTH1522]
gi|1490533	26867.2	93.6	11.72	4	GFPuv [Cloning vector pBAD-GFPuv]_x0001_gi|45862394|gb|AAS78973.1| smGFP [Binary Vector pORE_R3]_x0001_gi|45862399|gb|AAS78977.1| smGFP [Binary Vector pORE_R4]_x0001_gi|45862404|gb|AAS78981.1| smGFP [Binary Vector pORE_R5]
gi|83754214	1.02742e+06	93.6	11.48	4	Chain A, Crystal Structure Of A Well-Folded Variant Of Green Fluorescent Protein_x0001_gi|83754215|pdb|2B3Q|B Chain B, Crystal Structure Of A Well-Folded Variant Of Green Fluorescent Protein_x0001_gi|83754216|pdb|2B3Q|C Chain C, Crystal Struct
gi|23200274	1.02764e+06	93.5	11.38	4	Chain A, Cyclic Green Fluorescent Protein_x0001_gi|23200275|pdb|1KP5|B Chain B, Cyclic Green Fluorescent Protein
gi|60651290	27866.3	93.5	11.34	4	green fluorescent protein [Reporter shuttle vector pSUN202]
gi|47524505	77154	93.5	5.37	6	beta-tubulin/green fluorescent protein S65T variant fusion protein [Expression vector pMF309]
gi|197107230	1.02779e+06	93.5	11.29	4	Chain A, Development Of A Family Of Redox-Sensitive Green Fluorescent Protein Indicators For Use In Relatively Oxidizing Subcellular Environments_x0001_gi|197107231|pdb|3CBE|A Chain A, Development Of A Family Of Redox-Sensitive Green Fl
gi|197107232	1.02779e+06	93.5	11.29	4	Chain A, Development Of A Family Of Redox-Sensitive Green Fluorescent Protein Indicators For Use In Relatively Oxidizing Subcellular Environments_x0001_gi|197107233|pdb|3CD9|A Chain A, Development Of A Family Of Redox-Sensitive Green Fl
gi|60651287	28142.6	93.5	11.24	4	green fluorescent protein [Shuttle reporter vector pSUN119]
gi|50507920	76967.9	93.5	5.35	6	yellow cameleon 3.60-pm [synthetic construct]
gi|164431666	78541.7	93.5	5.34	6	truncated beta-glucuronidase fusion protein [synthetic construct]
gi|14595134	80135	93.5	6.15	7	Picchu-236 [synthetic construct]
gi|38197737	77989.9	93.5	5.31	6	CD4-EGFP [Cloning vector pMACSiBac]
gi|7415879	29496.4	93.5	10.69	4	GFPuv4 [Cloning vector pGFPTA]_x0001_gi|157841129|gb|ABV83131.1| GFPuv4 [Cloning vector pGT3]
gi|10281475	33534.9	93.5	10.93	5	mutant green fluorescent protein [Cloning vector pGreenscript A]
gi|115336277	29730.7	93.5	10.61	4	GFPuv4-2AA [Cloning vector pGT2]
gi|30089002	79727.5	93.5	5.27	6	avermectin-sensitive chloride channel GluCl alpha/yellow fluorescent protein fusion [synthetic construct]
gi|93102488	29797.5	93.5	10.53	4	RuBisCo-green fluoresent protein fusion [synthetic construct]
gi|14595136	82898.5	93.4	7.3	7	Picchu-236-X [synthetic construct]
gi|51889273	81585.6	93.4	6.51	6	protein kinase C activity reporter protein [synthetic construct]
gi|17017334	81518.2	93.4	5.12	6	protein kinase A activity reporter 1 fusion protein [synthetic construct]
gi|164508022	82983.4	93.3	5.04	6	EGFP-CaMKII fusion [Cloning vector pBS.EGFP-MT-CK2A]
gi|14595123	83281.5	93.3	5	6	Rai-chu 101 [synthetic construct]
gi|40036925	83625.8	93.3	4.99	6	histone phosphorylation reporter fusion protein [synthetic construct]
gi|154268994	83738.1	93.3	4.99	6	eGFP/GIRK1 fusion protein [Cloning vector BSNG-rG1]
gi|34539036	84820.6	93.3	4.97	6	CFTR/EGFP fusion protein [synthetic construct]
gi|167966517	84367.4	93.2	4.95	6	dsRed1/N-WASP/Cdc42/ECFP fusion protein [synthetic construct]
gi|218457797	84414.1	93.2	4.93	6	G protein/GFP fusion protein [Recombinant vesicular stomatitis Indiana virus rVSV-G/GFP]
gi|82880401	84072.3	93.2	4.91	6	sensor protein FLII81PE [synthetic construct]
gi|167966515	85301.4	93.2	4.91	6	dsRed1/Pak1/Cdc42/ECFP fusion protein [synthetic construct]
gi|14595132	85015.7	93.2	4.88	6	Raichu404X [Homo sapiens]
gi|23095933	85077.5	93.2	6.17	6	Raichu-1054X [synthetic construct]
gi|23095931	85344	93.2	6.16	6	Raichu-1011X [synthetic construct]
gi|14595125	86044.9	93.1	6.15	6	Rai-chu 101X [synthetic construct]
gi|82880397	85194.5	93.1	4.84	6	glutamate sensor protein FLIPE-600n [synthetic construct]
gi|46561784	39927.3	93.1	7.91	4	rpL23-GFP fusion protein [rpL23-fusion expression vector pGFP]
gi|111116478	84963.1	93.1	4.82	6	glucose nanosensor protein FLIPglu600udelta13 [synthetic construct]
gi|167966513	87666.3	93.1	4.77	6	dsRed1/Pak1/Rac1/ECFP fusion protein [synthetic construct]
gi|17980553	87166.1	93.1	6.05	6	Crk-based reporter [synthetic construct]
gi|37665520	87056.2	93.1	4.76	6	Raichu-1237X [synthetic construct]
gi|172054577	87446.7	93.1	4.76	6	EGFP-Pak1-Cdc42-dsRed1-CAAX fusion protein [synthetic construct]
gi|94471603	87309.6	93	4.71	6	mitochondrial calcium sensor cameleon 4mtD3cpv [synthetic construct]
gi|168810899	43165.6	93	7.33	4	inclusion body protein A - yellow fluorescent protein fusion [Cloning vector pAc1]
gi|225685831	42757.5	93	7.24	4	HLG3rd-3 [synthetic construct]
gi|225685783	42809.8	93	7.22	4	HLG1st-2 [synthetic construct]
gi|225685789	42849.9	93	7.22	4	HLG1st-5 [synthetic construct]
gi|225685799	42821.8	93	7.22	4	HLG1st-11 [synthetic construct]
gi|225685803	42868.8	93	7.22	4	HLG2nd-1 [synthetic construct]
gi|225685805	42678.6	93	7.22	4	HLG2nd-2 [synthetic construct]
gi|225685809	42900.8	93	7.22	4	HLG2nd-4 [synthetic construct]
gi|225685815	42704.6	93	7.22	4	HLG2nd-7 [synthetic construct]
gi|225685817	42805.7	93	7.22	4	HLG2nd-8 [synthetic construct]
gi|225685819	42898.8	93	7.22	4	HLG2nd-9 [synthetic construct]
gi|225685825	42776.4	93	7.22	4	HLG2nd-12 [synthetic construct]
gi|225685827	42684.4	93	7.22	4	HLG3rd-1 [synthetic construct]
gi|225685829	43027.9	93	7.22	4	HLG3rd-2 [synthetic construct]
gi|225685833	42745.4	93	7.22	4	HLG3rd-4 [synthetic construct]
gi|225685835	42892.7	93	7.22	4	HLG3rd-5 [synthetic construct]
gi|225685837	42747.4	93	7.22	4	HLG3rd-6 [synthetic construct]
gi|225685839	43202	93	7.22	4	HLG3rd-7 [synthetic construct]
gi|225685841	42801.6	93	7.22	4	HLG3rd-8 [synthetic construct]
gi|225685843	42893.8	93	7.22	4	HLG3rd-9 [synthetic construct]
gi|225685845	42876.7	93	7.22	4	HLG3rd-11 [synthetic construct]
gi|225685847	42733.6	93	7.22	4	HLG3rd-10 [synthetic construct]
gi|225685779	43148.3	93	7.2	4	HLG10-6 [synthetic construct]
gi|225685781	43089.2	93	7.2	4	HLG1st-1 [synthetic construct]
gi|225685785	43135.2	93	7.2	4	HLG1st-3 [synthetic construct]
gi|225685787	43181.2	93	7.2	4	HLG1st-4 [synthetic construct]
gi|225685791	42952	93	7.2	4	HLG1st-6 [synthetic construct]
gi|225685793	43169.1	93	7.2	4	HLG1st-7 [synthetic construct]
gi|225685795	43152.2	93	7.2	4	HLG1st-8 [synthetic construct]
gi|225685797	43104.2	93	7.2	4	HLG1st-10 [synthetic construct]
gi|225685801	43122.1	93	7.2	4	HLG1st-12 [synthetic construct]
gi|225685807	43117	93	7.2	4	HLG2nd-3 [synthetic construct]
gi|225685811	43026	93	7.2	4	HLG2nd-5 [synthetic construct]
gi|225685813	43139.2	93	7.2	4	HLG2nd-6 [synthetic construct]
gi|225685821	43106.1	93	7.2	4	HLG2nd-10 [synthetic construct]
gi|225685823	42913.8	93	7.2	4	HLG2nd-11 [synthetic construct]
gi|83699618	87872.4	93	4.64	6	glucose-galactose binding/cyan fluorescent/yellow fluorescent fusion protein [Expression vector pRSETB]
gi|189473439	88240.8	93	4.64	6	N-EGFP/cystathionine-beta-synthase fusion protein [synthetic construct]
gi|172054575	89655.5	93	4.64	6	EGFP-Pak1-Rac1-dsRed1-CAAX fusion protein [synthetic construct]
gi|170293734	94719	92.7	5.59	6	glutamate-sensitive fluorescent reporter [synthetic construct]
gi|90992872	96428.6	92.6	4.33	6	GUS-eGFP fusion protein [Binary vector pGPro1]_x0001_gi|157781200|gb|ABV71994.1| gusA-eGFP [Binary vector pGPro2]
gi|14861207	56315.8	92.6	6.41	5	endo-xylanase GFP fusion protein [Expression vector pFL747]
gi|164431650	97254.6	92.6	4.31	6	beta-glucuronidase / GFP fusion protein [synthetic construct]
gi|82880399	96497.8	92.6	4.28	6	surface displayed FLIPE 600n sensor protein [synthetic construct]
gi|5702091	96341.6	92.6	4.27	6	green fluorescent protein-estrogen receptor alpha fusion [Mammalian expression vector pCI-nGL1-HEGO]
gi|7638079	96821.9	92.6	3.74	5	GUSA (N358Q)/MGFP5 fusion, hexaHis tagged [Binary vector pCAMBIA-1303]
gi|7638085	96821.8	92.6	3.74	5	mGFP5-GUSA fusion protein [Binary vector pCAMBIA-1304]_x0001_gi|118402822|emb|CAJ44417.1| fusion protein [Cloning vector pUDSC-B]
gi|209491027	60957.2	92.5	6.09	5	superoxide dismutase 2-enerokinase-GFP-His fusion protein [synthetic construct]
gi|67772470	98793.2	92.5	3.67	5	mGFP/GUS [Cloning vector pRGK337]_x0001_gi|210076752|gb|ACJ06731.1| mGFP/GUS [Cloning vector pRGK374]
gi|160419740	57905.7	92.4	5.41	4	AAD16GFP fusion protein [Plastid transformation vector pPRV131A]_x0001_gi|160419742|gb|ABX39486.1| AAD16GFP fusion protein [Plastid transformation vector pPRV131B]
gi|7637847	57948.6	92.4	5.38	4	FLARE16-S [Plastid transformation vector pMSK51]
gi|7637849	59325.1	92.4	5.25	4	FLARE11-S3 [Plastid transformation vector pMSK49]
gi|164431654	103224	92.3	4.07	6	beta-glucuronidase / GFP fusion protein [synthetic construct]
gi|189473445	106317	92.1	3.93	6	N-EGFP/amyloid beta precursor protein fusion protein [synthetic construct]
gi|189473437	108778	92	3.83	6	N-EGFP/nucleolar protein 11 fusion protein [synthetic construct]
gi|134302816	111751	91.8	3.71	6	Camuialpha [synthetic construct]
gi|1354498	117994	91.3	3.46	6	green fluorescent protein-glucocorticoid receptor chimeric protein [Cloning vector pCI-nGFP-C656G]
gi|189473451	124635	91	3.33	6	N-EGFP/centrosomal protein 97kDa fusion protein [synthetic construct]
gi|112821109	126490	90.8	3.28	6	EGFP-GluR2 fusion protein [Cloning vector pGFP-GluR2-Sin]
gi|50582469	128174	90.8	4.13	6	LIBRA [synthetic construct]
gi|226490323	127546	90.7	3.23	6	eGFP-rSAP97 fusion protein [Cloning vector pFU-EG-rSAP97I3]
gi|226490303	127520	90.7	3.23	6	SAP97-eGFP fusion protein [Cloning vector pFU-rSAP97I3-EG]
gi|217035443	1027013	89.8	11.11	4	Chain A, Crystal Structure Of Circular-Permutated Egfp
gi|157830960	7.02581e+06	89.7	9.32	3	Chain A, Green Fluorescent Protein From Aequorea Victoria
gi|150261557	1.102	89.7	9.32	3	Chain A, The Chemical Control Of Protein Folding: Engineering A Superfolder Green Fluorescent Protein
gi|93278675	1.02658e+06	89.2	7.63	4	Chain A, Crystal Structure Analysis Of A Rate-Enhanced Variant Of Redox-Sensitive Green Fluorescent Protein In The Reduced Form, Rogfp1-R8._x0001_gi|93278676|pdb|2AHA|B Chain B, Crystal Structure Analysis Of A Rate-Enhanced Variant Of Re
gi|118767177	217384	89.1	2.2	7	ORF1a polyprotein [DNA launch vector pDE-GFP2]
gi|118767178	375779	89.1	1.28	7	ORF1ab polyprotein/GFP fusion protein [DNA launch vector pDE-GFP2]
gi|218681839	1.05012e+06	88.3	7.35	5	Chain A, Calcium-Free Gcamp2 (Calcium Binding Deficient Mutant)
gi|217035444	1.04605e+06	88.2	6.57	4	Chain A, Crystal Structure Of Calcium Bound Monomeric Gcamp2
gi|217035445	1.05034e+06	87.8	6.01	4	Chain A, Crystal Structure Of Calcium Bound Dimeric Gcamp2, (#1)_x0001_gi|217035446|pdb|3EVV|A Chain A, Crystal Structure Of Calcium Bound Dimeric Gcamp2 (#2)_x0001_gi|218681825|pdb|3EK4|A Chain A, Calcium-Saturated Gcamp2 Monomer_x0001_gi|21868183
gi|218681831	1.05043e+06	87.8	6.01	4	Chain A, Calcium-Saturated Gcamp2 T116vG87R MUTANT MONOMER
gi|218681835	1.05039e+06	87.8	6.01	4	Chain A, Calcium-Saturated Gcamp2 T116vK378W MUTANT MONOMER
gi|87248062	50657.8	87.8	5.99	4	G-CaMP2 [synthetic construct]
gi|189473443	174461	87.1	2.38	6	N-EGFP/v-erb-a erythroblastic leukemia viral oncogene 4-like protein fusion protein [synthetic construct]
gi|211970883	1.27017e+06	85.3	1.52	6	polyprotein [Human enterovirus 71]
gi|194716543	70001.8	85.2	3.72	5	calcium indicator TN-XXL [synthetic construct]
gi|158264285	467188	84.8	0.89	6	recombinant marker BVDV polyprotein [Infectious marker vector pASD1-eGFP2A3]
gi|116804323	385604	83.6	0.88	5	polyprotein [Reporter vector pCBTuMV-GFP]
gi|34421676	26896.3	77.4	9.66	3	green fluorescent protein [Aequorea coerulescens]
gi|253723015	1.02658e+06	76.4	8.02	4	Chain A, Crystal Structure Of A Yellow Fluorescent Protein With Improved Maturation And Reduced Environmental Sensitivity
gi|260099862	1.02656e+06	76.4	8.02	4	Chain A, Structure Of Enhanced Cyan Fluorescent Protein At Physiological Ph
gi|260099863	1.02643e+06	76.4	8.02	4	Chain A, Structure Of Cerulean Fluorescent Protein At Physiological Ph
gi|260505759	26667.1	76.4	8.02	4	GFP [Recombineering donor plasmid pDOC-G]
gi|145666499	26904.6	76.3	7.95	4	blue fluorescent protein variant EBFP2 [synthetic construct]
gi|145666497	26791.4	76.3	7.95	4	blue fluorescent protein variant mKalama1 [synthetic construct]
gi|239819625	27879.4	76.3	7.66	4	green fluorescent protein [Expression vector pPM2a]
gi|269854601	28003.6	76.3	7.63	4	Venus+Strep tag [Cloning and transformation vector pHPdestVenus]
gi|255689291	31133.2	76.1	6.79	4	d1EGFP [Fusion vector pDsred-express::plac::prrn::pd1egfp]
gi|37928112	1.02534e+06	75.6	10.09	3	Chain A, Crystal Structure Of Matured Green Fluorescent Protein R96a Variant
gi|99031845	1.02537e+06	75.6	10.09	3	Chain A, Gfp R96a Chromophore Maturation Recovery Mutant R96a Q183r
gi|99031844	1.0254e+06	75.6	10.09	3	Chain A, Mature R96k Gfp Mutant
gi|99031843	1.0254e+06	75.6	10.09	3	Chain A, Gfp R96m Mature Chromophore
gi|37928105	25587.8	75.6	10.04	3	Chain A, Crystal Structure Of Precyclized Intermediate For The Green Fluorescent Protein R96a Variant (B)
gi|37928101	25658.8	75.6	10	3	Chain A, Crystal Structure Of Precyclized Intermediate For The Green Fluorescent Protein R96a Variant (A)
gi|99031842	25719	75.6	10	3	Chain A, Gfp R96m Pre-Cyclized Intermediate In Chromophore Formation
gi|61680649	26661.9	75.5	9.62	3	Chain A, Uncyclized Precursor Structure Of S65a Y66s R96a Gfp Variant
gi|145579497	26718	75.5	9.62	3	Chain A, Structure Of S65t Y66f R96a Gfp Variant In Precursor State
gi|158430429	6026024	75.5	9.62	3	Chain A, Crystal Structure Of A Cyclized Gfp Variant
gi|99032352	1.01965e+06	74.9	11.05	4	Chain B, Structure Of S65a Y66s Gfp Variant After Backbone Fragmentation
gi|99032375	19778.1	74.9	10.98	4	Chain B, Structure Of S65g Y66a Gfp Variant After Spontaneous Peptide Hydrolysis
gi|99032371	1.01971e+06	74.9	10.98	4	Chain B, Structure Of S65g Y66s Gfp Variant After Spontaneous Peptide Hydrolysis_x0001_gi|99032394|pdb|2G5Z|B Chain B, Structure Of S65g Y66s Gfp Variant After Spontaneous Peptide Hydrolysis And Decarboxylation
gi|158605295	26802.2	74.5	7.95	4	fluorescent protein mAmetrine [synthetic construct]
gi|237652136	26823.4	72.9	5.88	3	green fluorescent protein [Transient expression vector pXGFP-P]_x0001_gi|237652187|gb|ACR08792.1| green fluorescent protein [Binary vector pCXGFP-P]
gi|253987482	26887.3	72.9	5.88	3	ratiometric pHluorin [synthetic construct]
gi|262348071	26926.4	72.9	5.88	3	GFP [Expression vector pHT3AG]
gi|634011	26867.4	70.8	5.88	3	green fluorescent protein [Aequorea victoria]
gi|83754213	1.02743e+06	70.7	5.74	3	Chain A, Crystal Structure Of A Superfolder Green Fluorescent Protein
gi|260268067	95338.3	68.2	1.66	3	g3 green fluorescent protein-beta-glucuronidase [Gateway binary vector R4L1pGWB432]_x0001_gi|260268102|dbj|BAI43885.1| g3 green fluorescent protein-beta-glucuronidase [Gateway binary vector R4L1pGWB532]
gi|207091331	141169	68.2	1.48	4	Puromycin2AGFP2ALuciferase2ANTR [Retroviral expression vector L149]
gi|34421678	26775.1	62.8	7.98	2	aceGFP [synthetic construct]
gi|91064842	26874.3	62.8	7.95	2	AcGFP1, sub-cloned from pIRES2-AcGFP1 [Cloning vector pT7XbG2-AcGFP1]
gi|46578228	27274.8	62.8	7.85	2	photo-switchable cyan fluorescent protein [synthetic construct]
gi|221046699	1.029e+06	61.3	5.77	3	Chain A, Application Of The Superfolder Yfp Bimolecular Fluorescence Complementation For Studying Protein-Protein Interactions In Vitro_x0001_gi|221046700|pdb|3ED8|B Chain B, Application Of The Superfolder Yfp Bimolecular Fluorescence C
gi|99032351	1.0069e+06	60.9	21.21	1	Chain A, Structure Of S65a Y66s Gfp Variant After Backbone Fragmentation_x0001_gi|99032393|pdb|2G5Z|A Chain A, Structure Of S65g Y66s Gfp Variant After Spontaneous Peptide Hydrolysis And Decarboxylation
gi|99032370	6922.96	60.9	21.21	1	Chain A, Structure Of S65g Y66s Gfp Variant After Spontaneous Peptide Hydrolysis_x0001_gi|99032374|pdb|2G3D|A Chain A, Structure Of S65g Y66a Gfp Variant After Spontaneous Peptide Hydrolysis
gi|4206096	7136.15	60.9	20.9	1	green fluorescent protein [synthetic construct]
gi|49258783	1.002	29.5	5.75	3	Chain A, Crystallographic Evidence For Isomeric Chromophores In 3- Fluorotyrosyl-Green Fluorescent Protein
gi|146413489	79973.6	85.9	4.85	3	hypothetical protein PGUG_04670 [Pichia guilliermondii ATCC 6260]_x0001_gi|146392414|gb|EDK40572.1| hypothetical protein PGUG_04670 [Pichia guilliermondii ATCC 6260]
gi|50420761	80569.2	85.9	4.82	3	hypothetical protein DEHA0D11352g [Debaryomyces hansenii CBS767]_x0001_gi|49654585|emb|CAG87072.1| DEHA2D10406p [Debaryomyces hansenii]
gi|68469132	80823.4	85.9	4.81	3	hypothetical protein CaO19.6515 [Candida albicans SC5314]_x0001_gi|68470157|ref|XP_720840.1| hypothetical protein CaO19.13868 [Candida albicans SC5314]_x0001_gi|77022758|ref|XP_888823.1| hypothetical protein CaO19_6515 [Candida albicans
gi|126131962	81253.8	85.9	4.8	3	Heat shock protein 90 homolog [Pichia stipitis CBS 6054]_x0001_gi|126094331|gb|ABN64477.1| Heat shock protein 90 homolog [Pichia stipitis CBS 6054]
gi|149235644	81682.3	85.9	4.77	3	ATP-dependent molecular chaperone HSC82 [Lodderomyces elongisporus NRRL YB-4239]_x0001_gi|146452679|gb|EDK46935.1| ATP-dependent molecular chaperone HSC82 [Lodderomyces elongisporus NRRL YB-4239]
gi|99031945	77975	83.1	3.55	2	Chain A, Crystal Structure Of An Hsp90-Sba1 Closed Chaperone Complex_x0001_gi|99031946|pdb|2CG9|B Chain B, Crystal Structure Of An Hsp90-Sba1 Closed Chaperone Complex
gi|169776601	79632.1	83.1	3.43	2	hypothetical protein [Aspergillus oryzae RIB40]_x0001_gi|238503321|ref|XP_002382894.1| molecular chaperone and allergen Mod-E/Hsp90/Hsp1 [Aspergillus flavus NRRL3357]_x0001_gi|83771502|dbj|BAE61634.1| unnamed protein product [Aspergi
gi|7549229	78988.2	83.1	3.48	2	heat shock protein 90 [Candida tropicalis]
gi|6979704	78909.5	83.1	3.45	2	heat shock protein 80 [Neurospora crassa]
gi|115432960	79804.1	83.1	3.42	2	heat shock protein 82 [Aspergillus terreus NIH2624]_x0001_gi|114189469|gb|EAU31169.1| heat shock protein 82 [Aspergillus terreus NIH2624]
gi|145242802	79782.2	83.1	3.42	2	heat shock protein sspB-Aspergillus niger_x0001_gi|134078531|emb|CAK40452.1| heat shock protein sspB-Aspergillus niger
gi|189202774	79899.4	83.1	3.42	2	heat shock protein 90 [Pyrenophora tritici-repentis Pt-1C-BFP]_x0001_gi|187984822|gb|EDU50310.1| heat shock protein 90 [Pyrenophora tritici-repentis Pt-1C-BFP]
gi|169596240	79913.3	83.1	3.41	2	hypothetical protein SNOG_00877 [Phaeosphaeria nodorum SN15]_x0001_gi|111071252|gb|EAT92372.1| hypothetical protein SNOG_00877 [Phaeosphaeria nodorum SN15]
gi|115490911	80381	83.1	3.41	2	heat shock protein 90 [Monascus pilosus]
gi|121717654	80188.6	83.1	3.41	2	molecular chaperone Mod-E/Hsp90 [Aspergillus clavatus NRRL 1]_x0001_gi|119404312|gb|EAW14688.1| molecular chaperone Mod-E/Hsp90 [Aspergillus clavatus NRRL 1]
gi|45198373	80695.6	83.1	3.41	2	AFL148Cp [Ashbya gossypii ATCC 10895]_x0001_gi|51701597|sp|Q8J2M3.1|HSP82_ASHGO RecName: Full=Heat shock protein HSP82_x0001_gi|24460979|gb|AAN61917.1|AF431814_1 heat shock protein [Eremothecium gossypii]_x0001_gi|44984260|gb|AAS53226.1| AFL14
gi|6323840	80899.8	83.1	3.4	2	Cytoplasmic chaperone of the Hsp90 family, redundant in function and nearly identical with Hsp82p, and together they are essential; expressed constitutively at 10-fold higher basal levels than HSP82 and induced 2-3 fold by hea
gi|171723	80872.7	83.1	3.4	2	hsc82 protein [Saccharomyces cerevisiae]
gi|119498717	80495.9	83.1	3.4	2	molecular chaperone Mod-E/Hsp90 [Neosartorya fischeri NRRL 181]_x0001_gi|119414280|gb|EAW24219.1| molecular chaperone Mod-E/Hsp90 [Neosartorya fischeri NRRL 181]
gi|70984840	80640	83.1	3.4	2	molecular chaperone and allergen Mod-E/Hsp90/Hsp1 [Aspergillus fumigatus Af293]_x0001_gi|83303658|sp|P40292.3|HSP90_ASPFU RecName: Full=Heat shock protein 90; AltName: Full=Heat shock protein hsp1; AltName: Full=65 kDa IgE-binding
gi|6325016	81406.4	83.1	3.39	2	Hsp82p [Saccharomyces cerevisiae]_x0001_gi|123677|sp|P02829.1|HSP82_YEAST RecName: Full=ATP-dependent molecular chaperone HSP82; AltName: Full=Heat shock protein Hsp90 heat-inducible isoform; AltName: Full=82 kDa heat shock protein_x0001_
gi|50307323	81629.5	83.1	3.37	2	unnamed protein product [Kluyveromyces lactis]_x0001_gi|49642774|emb|CAH00736.1| KLLA0D12958p [Kluyveromyces lactis]
gi|19115277	80596.4	83.1	3.41	2	heat shock protein Hsp90 [Schizosaccharomyces pombe]_x0001_gi|19859479|sp|P41887.2|HSP90_SCHPO RecName: Full=Heat shock protein 90 homolog_x0001_gi|5824203|emb|CAB54152.1| Hsp90 chaperone [Schizosaccharomyces pombe]
gi|50548217	80335.2	83.1	3.41	2	YALI0C07953p [Yarrowia lipolytica]_x0001_gi|49647445|emb|CAG81881.1| YALI0C07953p [Yarrowia lipolytica]
gi|623613	80775.7	83.1	3.41	2	heat shock protein 90 [Schizosaccharomyces pombe]
gi|85102240	80189	83.1	3.4	2	heat shock protein 90 [Neurospora crassa OR74A]_x0001_gi|12718221|emb|CAC28765.1| heat shock protein 80 [Neurospora crassa]_x0001_gi|28922841|gb|EAA32062.1| heat shock protein 90 [Neurospora crassa OR74A]
gi|15554354	70705	59.8	2.09	1	heat shock protein [Aspergillus niger]
gi|171692405	79322.7	59.8	1.85	1	unnamed protein product [Podospora anserina]_x0001_gi|6016265|sp|O43109.1|HSP90_PODAN RecName: Full=Heat shock protein 90 homolog; AltName: Full=Suppressor of vegetative incompatibility MOD-E_x0001_gi|2804612|gb|AAB97626.1| MOD-E [Po
gi|88766397	80187.7	59.8	1.85	1	heat shock protein 90 [Metarhizium anisopliae]
gi|66525526	81800.1	83.5	2.92	2	PREDICTED: similar to CG11107-PA isoform 1 [Apis mellifera]
gi|156537844	81832.1	83.5	2.91	2	PREDICTED: similar to ATP-dependent RNA helicase [Nasonia vitripennis]
gi|170043541	82514	64.9	2.61	2	ATP-dependent RNA helicase [Culex quinquefasciatus]_x0001_gi|167866848|gb|EDS30231.1| ATP-dependent RNA helicase [Culex quinquefasciatus]
gi|157106032	82544.9	60.5	1.52	1	ATP-dependent RNA helicase [Aedes aegypti]_x0001_gi|108879962|gb|EAT44187.1| ATP-dependent RNA helicase [Aedes aegypti]
gi|67902564	79810.2	83.1	3.43	2	HS90_PODAN HEAT SHOCK PROTEIN 90 HOMOLOG (SUPPRESSOR OF VEGETATIVE INCOMPATIBILITY MOD-E) [Aspergillus nidulans FGSC A4]_x0001_gi|40739817|gb|EAA59007.1| HS90_PODAN HEAT SHOCK PROTEIN 90 HOMOLOG (SUPPRESSOR OF VEGETATIVE INCOMPATIB
gi|50292725	81033.1	83.1	3.4	2	unnamed protein product [Candida glabrata]_x0001_gi|49528108|emb|CAG61765.1| unnamed protein product [Candida glabrata]
gi|156848696	81450.4	83.1	3.39	2	hypothetical protein Kpol_1002p16 [Vanderwaltozyma polyspora DSM 70294]_x0001_gi|156117914|gb|EDO19371.1| hypothetical protein Kpol_1002p16 [Vanderwaltozyma polyspora DSM 70294]
gi|92109874	57630.1	59.5	2.17	1	IP13374p [Drosophila melanogaster]
gi|168830559	68192.6	59.5	1.88	1	cytosolic heat shock protein 90 [Andalucia incarcerata]
gi|121998371	71995.6	59.5	1.74	1	heat shock protein 90 [Halorhodospira halophila SL1]_x0001_gi|166223047|sp|A1WXE4.1|HTPG_HALHL RecName: Full=Chaperone protein htpG; AltName: Full=Heat shock protein htpG; AltName: Full=High temperature protein G_x0001_gi|121589776|g
gi|213404284	80861.7	59.5	1.56	1	ATP-dependent molecular chaperone HSC82 [Schizosaccharomyces japonicus yFS275]_x0001_gi|212000961|gb|EEB06621.1| ATP-dependent molecular chaperone HSC82 [Schizosaccharomyces japonicus yFS275]
gi|21357739	90238.8	59.5	1.4	1	glycoprotein 93 [Drosophila melanogaster]_x0001_gi|7301648|gb|AAF56765.1| glycoprotein 93 [Drosophila melanogaster]_x0001_gi|18447291|gb|AAL68222.1| LD23641p [Drosophila melanogaster]_x0001_gi|220956620|gb|ACL90853.1| Gp93-PA [synthetic constr
gi|194907086	90160.7	59.5	1.4	1	GG11583 [Drosophila erecta]_x0001_gi|190656122|gb|EDV53354.1| GG11583 [Drosophila erecta]
gi|195352990	90204.7	59.5	1.4	1	GM16365 [Drosophila sechellia]_x0001_gi|194127058|gb|EDW49101.1| GM16365 [Drosophila sechellia]
gi|195503625	90152.6	59.5	1.4	1	GE23773 [Drosophila yakuba]_x0001_gi|194184831|gb|EDW98442.1| GE23773 [Drosophila yakuba]
gi|195574457	90219.7	59.5	1.4	1	GD21359 [Drosophila simulans]_x0001_gi|194201132|gb|EDX14708.1| GD21359 [Drosophila simulans]
gi|194746366	90287.9	59.5	1.4	1	GF18871 [Drosophila ananassae]_x0001_gi|190628688|gb|EDV44212.1| GF18871 [Drosophila ananassae]
gi|195108998	90639.4	59.5	1.39	1	GI24315 [Drosophila mojavensis]_x0001_gi|193915673|gb|EDW14540.1| GI24315 [Drosophila mojavensis]
gi|195449369	90596.1	59.5	1.39	1	GK22636 [Drosophila willistoni]_x0001_gi|194168129|gb|EDW83030.1| GK22636 [Drosophila willistoni]
gi|195394999	90659.3	59.5	1.39	1	GJ10398 [Drosophila virilis]_x0001_gi|194142833|gb|EDW59236.1| GJ10398 [Drosophila virilis]
gi|125773987	90513.1	59.5	1.39	1	GA18946 [Drosophila pseudoobscura pseudoobscura]_x0001_gi|54637988|gb|EAL27390.1| GA18946 [Drosophila pseudoobscura pseudoobscura]
gi|195143967	90499.1	59.5	1.39	1	GL23644 [Drosophila persimilis]_x0001_gi|194101911|gb|EDW23954.1| GL23644 [Drosophila persimilis]
gi|195037341	90795.8	59.5	1.39	1	GH18412 [Drosophila grimshawi]_x0001_gi|193894315|gb|EDV93181.1| GH18412 [Drosophila grimshawi]
gi|149058718	87594.1	82.6	2.83	2	minichromosome maintenance deficient 6 (MIS5 homolog, S. pombe) (S. cerevisiae), isoform CRA_b [Rattus norvegicus]
gi|149637052	87837.7	82.6	2.82	2	PREDICTED: similar to HsMcm6 [Ornithorhynchus anatinus]
gi|62630180	88945.9	82.6	2.8	2	unknown [Homo sapiens]
gi|74211493	89783.9	82.6	2.77	2	unnamed protein product [Mus musculus]
gi|7427519	92889.3	82.6	2.68	2	minichromosome maintenance complex component 6 [Homo sapiens]_x0001_gi|2497824|sp|Q14566.1|MCM6_HUMAN RecName: Full=DNA replication licensing factor MCM6; AltName: Full=p105MCM_x0001_gi|1688042|dbj|BAA12699.1| HsMcm6 [Homo sapiens]_x0001_gi|216
gi|6678832	92867.1	82.6	2.68	2	minichromosome maintenance complex component 6 [Mus musculus]_x0001_gi|2497825|sp|P97311.1|MCM6_MOUSE RecName: Full=DNA replication licensing factor MCM6; AltName: Full=Mis5 homolog_x0001_gi|1498166|dbj|BAA13159.1| mMIS5 [Mus musculus]_x0001_gi
gi|74178019	92864.1	82.6	2.68	2	unnamed protein product [Mus musculus]
gi|158749644	92815.1	82.6	2.68	2	mini chromosome maintenance deficient 6 [Rattus norvegicus]_x0001_gi|149058717|gb|EDM09874.1| minichromosome maintenance deficient 6 (MIS5 homolog, S. pombe) (S. cerevisiae), isoform CRA_a [Rattus norvegicus]_x0001_gi|161728828|dbj|BAF9
gi|114052981	92930.4	82.6	2.68	2	minichromosome maintenance complex component 6 [Bos taurus]_x0001_gi|108860789|sp|Q2KIZ8.1|MCM6_BOVIN RecName: Full=DNA replication licensing factor MCM6_x0001_gi|86827569|gb|AAI12449.1| Minichromosome maintenance complex component 6
gi|109104380	92848.2	82.6	2.68	2	PREDICTED: minichromosome maintenance protein 6 isoform 1 [Macaca mulatta]_x0001_gi|109104382|ref|XP_001096301.1| PREDICTED: minichromosome maintenance protein 6 isoform 2 [Macaca mulatta]
gi|114581040	92921.3	82.6	2.68	2	PREDICTED: minichromosome maintenance protein 6 isoform 1 [Pan troglodytes]_x0001_gi|114581042|ref|XP_001154732.1| PREDICTED: minichromosome maintenance protein 6 isoform 2 [Pan troglodytes]
gi|161728849	1.0927e+06	82.6	2.68	2	Mcm6 [Rattus norvegicus]
gi|194222196	92930.3	82.6	2.68	2	PREDICTED: similar to Minichromosome maintenance complex component 6 [Equus caballus]
gi|53130692	93303.4	82.6	2.67	2	hypothetical protein [Gallus gallus]
gi|224056098	93324.5	82.6	2.66	2	PREDICTED: minichromosome maintenance complex component 6 [Taeniopygia guttata]
gi|148707803	98088.1	82.6	2.55	2	minichromosome maintenance deficient 6 (MIS5 homolog, S. pombe) (S. cerevisiae), isoform CRA_a [Mus musculus]
gi|57529699	103500	82.6	2.4	2	minichromosome maintenance complex component 6 [Gallus gallus]_x0001_gi|53131600|emb|CAG31831.1| hypothetical protein [Gallus gallus]
gi|73984318	107200	82.6	2.3	2	PREDICTED: similar to DNA replication licensing factor MCM6 (P105MCM) [Canis familiaris]
gi|194387710	49563.1	59.9	2.5	1	unnamed protein product [Homo sapiens]
gi|902342	35894	82.3	6.75	2	human homolog is GPI-anchored protein [Mus musculus]
gi|149022784	36773.9	82.3	6.4	2	rCG26771, isoform CRA_c [Rattus norvegicus]_x0001_gi|149022785|gb|EDL79679.1| rCG26771, isoform CRA_c [Rattus norvegicus]
gi|149022781	37218.2	82.3	6.33	2	rCG26771, isoform CRA_a [Rattus norvegicus]
gi|74201554	37582.5	82.3	6.23	2	unnamed protein product [Mus musculus]
gi|109106821	70353.3	82.3	3.34	2	PREDICTED: similar to membrane component chromosome 11 surface marker 1 isoform 1 [Macaca mulatta]_x0001_gi|114636908|ref|XP_001146918.1| PREDICTED: membrane component chromosome 11 surface marker 1 isoform 2 [Pan troglodytes]_x0001_
gi|193785457	70361.3	82.3	3.34	2	unnamed protein product [Homo sapiens]
gi|662994	72751.6	82.3	3.24	2	GPI-anchored protein p137 [Homo sapiens]
gi|194217811	73255.7	82.3	3.21	2	PREDICTED: cell cycle associated protein 1 [Equus caballus]
gi|37723349	73582.2	82.3	3.2	2	glycosyl-phosphatidyl-inositol-anchored protein p137-like [Rattus norvegicus]
gi|148695759	73654.2	82.3	3.2	2	GPI-anchored membrane protein 1, isoform CRA_b [Mus musculus]
gi|157928412	73723.4	82.3	3.2	2	cell cycle associated protein 1 [synthetic construct]_x0001_gi|157929050|gb|ABW03810.1| cell cycle associated protein 1 [synthetic construct]_x0001_gi|157929266|gb|ABW03918.1| cell cycle associated protein 1 [synthetic construct]
gi|73982187	74731.3	82.3	3.09	2	PREDICTED: similar to membrane component chromosome 11 surface marker 1 isoform 1 isoform 3 [Canis familiaris]
gi|56541118	76731.5	82.3	3.03	2	Caprin1 protein [Rattus norvegicus]
gi|149022782	76616.3	82.3	3.03	2	rCG26771, isoform CRA_b [Rattus norvegicus]_x0001_gi|149022783|gb|EDL79677.1| rCG26771, isoform CRA_b [Rattus norvegicus]
gi|162329568	76664.3	82.3	3.03	2	cytoplasmic activation/proliferation-associated protein 1 isoform c [Mus musculus]_x0001_gi|162329570|ref|NP_001104762.1| cytoplasmic activation/proliferation-associated protein 1 isoform c [Mus musculus]
gi|42734503	76861.6	82.3	3.03	2	membrane component chromosome 11 surface marker 1 isoform 2 [Homo sapiens]_x0001_gi|114636902|ref|XP_001147195.1| PREDICTED: membrane component chromosome 11 surface marker 1 isoform 6 [Pan troglodytes]_x0001_gi|114636904|ref|XP_00114705
gi|119588582	77258.1	82.3	3.01	2	GPI-anchored membrane protein 1, isoform CRA_a [Homo sapiens]
gi|162329566	77088.8	82.3	3.01	2	cytoplasmic activation/proliferation-associated protein 1 isoform b [Mus musculus]
gi|73982185	77302	82.3	2.99	2	PREDICTED: similar to membrane component chromosome 11 surface marker 1 isoform 2 isoform 1 [Canis familiaris]
gi|56078512	78005.8	82.3	2.97	2	Cell cycle associated protein 1 [Mus musculus]
gi|42558248	78169	82.3	2.97	2	cytoplasmic activation/proliferation-associated protein 1 isoform a [Mus musculus]_x0001_gi|162329564|ref|NP_001104759.1| cytoplasmic activation/proliferation-associated protein 1 isoform a [Mus musculus]_x0001_gi|182676427|sp|Q60865.2|C
gi|87239978	78120.9	82.3	2.97	2	cell cycle associated protein 1 [Rattus norvegicus]_x0001_gi|109469951|ref|XP_001052978.1| PREDICTED: GPI-anchored membrane protein 1 [Rattus norvegicus]_x0001_gi|182627592|sp|Q5M9G3.2|CAPR1_RAT RecName: Full=Caprin-1; AltName: Full=C
gi|115497038	78328.1	82.3	2.97	2	membrane component chromosome 11 surface marker 1 [Bos taurus]_x0001_gi|122134276|sp|Q1LZB6.1|CAPR1_BOVIN RecName: Full=Caprin-1; AltName: Full=Cytoplasmic activation- and proliferation-associated protein 1_x0001_gi|94534787|gb|AAI16
gi|42558250	78366.3	82.3	2.96	2	membrane component chromosome 11 surface marker 1 isoform 1 [Homo sapiens]_x0001_gi|114636898|ref|XP_001147120.1| PREDICTED: membrane component chromosome 11 surface marker 1 isoform 5 [Pan troglodytes]_x0001_gi|114636900|ref|XP_00114699
gi|73982183	78806.7	82.3	2.93	2	PREDICTED: similar to membrane component chromosome 11 surface marker 1 isoform 1 isoform 2 [Canis familiaris]_x0001_gi|73982189|ref|XP_858229.1| PREDICTED: similar to membrane component chromosome 11 surface marker 1 isoform 1 iso
[truncated: 21,159 more rows]

## Sheet: Supplementary file 1B
Supplementary file 1B: List of plasmids produced in this study.
Plasmid name	Insert			Tags	Cloning sites	Plasmid		Expression
	cDNA cloned	GenBank	Encoded amino acid residues			Backbone	GenBank
pEGFP-C1	none	not applicable	not applicable	eGFP	none	pEGFP-C1	U55763	Mammalian cells
GFP-NUP98	NUP98	NM_016320.4	1-920	eGFP	EcoRI / BamHI
GFP-NUP98 1-497	NUP98	NM_016320.4	1-497	eGFP	EcoRI / BamHI
GFP-NUP98 498-920	NUP98	NM_016320.4	498-920	eGFP	EcoRI / BamHI
pGEX-6P1	none	not applicable	not applicable	GST	none	pGEX-6P-1	U78872.1	E.coli bacteria
GST-NUP98	NUP98	NM_016320.4	1-920	GST	EcoRI / NotI
GST-NUP98 1-497	NUP98	NM_016320.4	1-497	GST	EcoRI / NotI
GST-NUP98 498-920	NUP98	NM_016320.4	498-920	GST	EcoRI / NotI
GST-DHX9	DHX9	NM_001357.4	1-1270	GST	EcoRI / XhoI
GST-DHX9 1-380	DHX9	NM_001357.4	1-380	GST	EcoRI / XhoI
GST-DHX9 381-820	DHX9	NM_001357.4	381-820	GST	EcoRI / XhoI
GST-DHX9 821-1270	DHX9	NM_001357.4	821-1270	GST	EcoRI / XhoI
GST-DHX9-GFP 1-380	DHX9	NM_001357.4	1-380	GST (N-term)	EcoRI / XhoI
	eGFP	U55763	1-265	eGFP (C-term)	XhoI / NotI
GST-DHX9-GFP 381-820	DHX9	NM_001357.4	381-820	GST (N-term)	EcoRI / XhoI
	eGFP	U55763	1-265	eGFP (C-term)	XhoI / NotI
GST-DHX9-GFP 821-1270	DHX9	NM_001357.4	821-1270	GST (N-term)	EcoRI / XhoI
	eGFP	U55763	1-265	eGFP (C-term)	XhoI / NotI

## Sheet: Supplementary file 1C
Supplementary file 1C: List of shRNAs.
Target mRNA	shRNA sequence	Clone ID
NUP98	CCGGCCCTTGCAGATGGCTCTTAATCTCGAGATTAAGAGCCATCTGCAAGGGTTTTTG	NM_005387.3-2874s1c1
DHX9	CCGGGGGCTATATCCATCGAAATTTCTCGAGAAATTTCGATGGATATAGCCCTTTTTG	NM_001357.3-2863s21c1
HNRNPU	CCGGCAGTGCTTCTTCCCTTACAATCTCGAGATTGTAAGGGAAGAAGCACTGTTTTTG	NM_031844.2-1136s21c1
non-mammalian control	CCGGGCGCGATAGCGCTAATAATTTCTCGAGAAATTATTAGCGCTATCGCGCTTTTTG	SHC002

## Sheet: Supplementary file 1D
Supplementary file 1D: List of primers.
	Gene		Primer sequence
Target transcripts and gene loci	NUP98 mRNA	Forward	ACCACCCAGAACACTGGCTT
		Reverse	GGCTGTGAGGCTTGGGTTAC
	DHX9 mRNA	Forward	CTCCACATCTGGCTCTCAAA
		Reverse	TTTTCCAAGGTCCAGTTTCC
	ZFY exon 8	Forward	AAACCTAGTACCATCCAAAACC
		Reverse	GGACAGTAAAAATCAGGTAGGG
	ZFY mRNA	Forward	TCAGTGTGAGTACTGTGAGTATAGC
		Reverse	TTAGGGCAGACCAACTTCTTTATGG
	HOXA2 intron 1	Forward	AGCTATTGTGCTGCCTTTCC
		Reverse	AAAGTTTGCTCCCGGATG
	HOXA2 mRNA	Forward	GAGCTGGCCTAAACAATGACAGTCC
		Reverse	AAGTCGATTGTGGTGAGTGTGTCTG
	NHLH2 exon 3/mRNA	Forward	GGAGAGTAGCTTCTTTGTGTGTG
		Reverse	TCACAGCAGAGAACATGAAACA
	MYC 5' TSS	Forward	TCTCCACTTGCCCCTTTTAG
		Reverse	CGGAGTTCCCAATTTCTCAG
	MYC exon 3/mRNA	Forward	GCTGCTTAGACGCTGGATTT
		Reverse	CACCGAGTCGTAGTCGAGGT
	JUND 5' TSS	Forward	TCGCTCATTTGCATGGAG
		Reverse	CTGTTGTGGCGTTTACCG
	JUND exon1	Forward	CTGGCGTAACGAGACTTTACTG
		Reverse	CGAGTCCACATTCCTGTTTG
	JUND mRNA	Forward	GCCCATCGACATGGACAC
		Reverse	TGGCTGAGGACTTTCTGCTT
	HEXIM1 exon 1/mRNA	Forward	GCATGGAGGACGAGAACAAC
		Reverse	GGTCAGCAGCTGGAGGTTC
	E1A pre-mRNA	Forward	TTATCACCGGAGGAATACGG
		Reverse	CTGCCCATAATTTTCACTTACTG
	E1A	Forward	TTATCACCGGAGGAATACGG
		Reverse	CTGCCCATAATTTTCACTTACTG
	FOXP2 intron 1	Forward	AAGTGCTATGCCCCAAGATG
		Reverse	GAGTATAACGCCTTGTTGTTCC
	FOXP2 mRNA	Forward	GCAACTCTCATAAGGCAGGC
		Reverse	TTTGTGACCTTCGCTTCTGG
Splice isoforms	13S E1A	Forward	GATCGAAGAGGTACTGGCTG
		Reverse	ACTCCTCACCCTCTTCATCC
	12S E1A	Forward	GATCGAAGAGGTACTGGCTG
		Reverse	GACACAGGACCCTCTTCATC
	11S E1A	Forward	GATCGAAGAGCCCGAGCAGC
		Reverse	CAAGACCTGCAACCGTGCCC
	10S E1A	Forward	GATCGAAGAGCCCGAGCAGC
		Reverse	GACACAGGACCCTCTTCATC
	9S E1A	Forward	GATCGAAGAGGTCCTGTGTC
		Reverse	TCAGGATAGCAGGCGCCATT
Housekeeping genes	HPRT	Forward	CCTGGCGTCGTGATTAGTG
		Reverse	ACACCCTTTCCAAATCCTCAG
	ACTIN	Forward	CTGTGGCATCCACGAAACTA
		Reverse	AGCACTGTGTTGGCGTACAG
	TUBULIN	Forward	GGAACCCACAGTCATTGATGAA
		Reverse	GCCCTCGGGCATAGTTATTG
	GAPDH	Forward	GCACCGTCAAGGCTGAGAAC
		Reverse	TGGTGAAGACGCCAGTGGA
Gene Desert	Chr4	Forward	AAGTGTGGCAAACACCTTCC
		Reverse	AATGGTTAGCTCCGTTGTGC
	Chr12	Forward	TCCCTCCATTTGTCCGTAAG
		Reverse	ATCCCTGTAAAACCCCAACC
DamID	adapter primer duplex	Top	CTAATACGACTCACTATAGGGCAGCGTGGTCGCGGCCGAGGA
		Bottom	TCCTCGGCCG
	PCR amplification		GGTCGCGGCCGAGGATC
