# Supplementary figures and images for: Human Nup98 regulates the localization and activity of DExH/D-box helicase DHX9
Source: eLife journal article supplement (doi:10.7554/elife.18825), 2017-02-21

IP IgG

Control

$\alpha$ -DHX9

$\alpha$ -Nup98

10% INPUT

130

- hnRNP U

170

130

- DHX9

95

- Nup98

170

130

- Nup153

72

- Nup62

mAb414

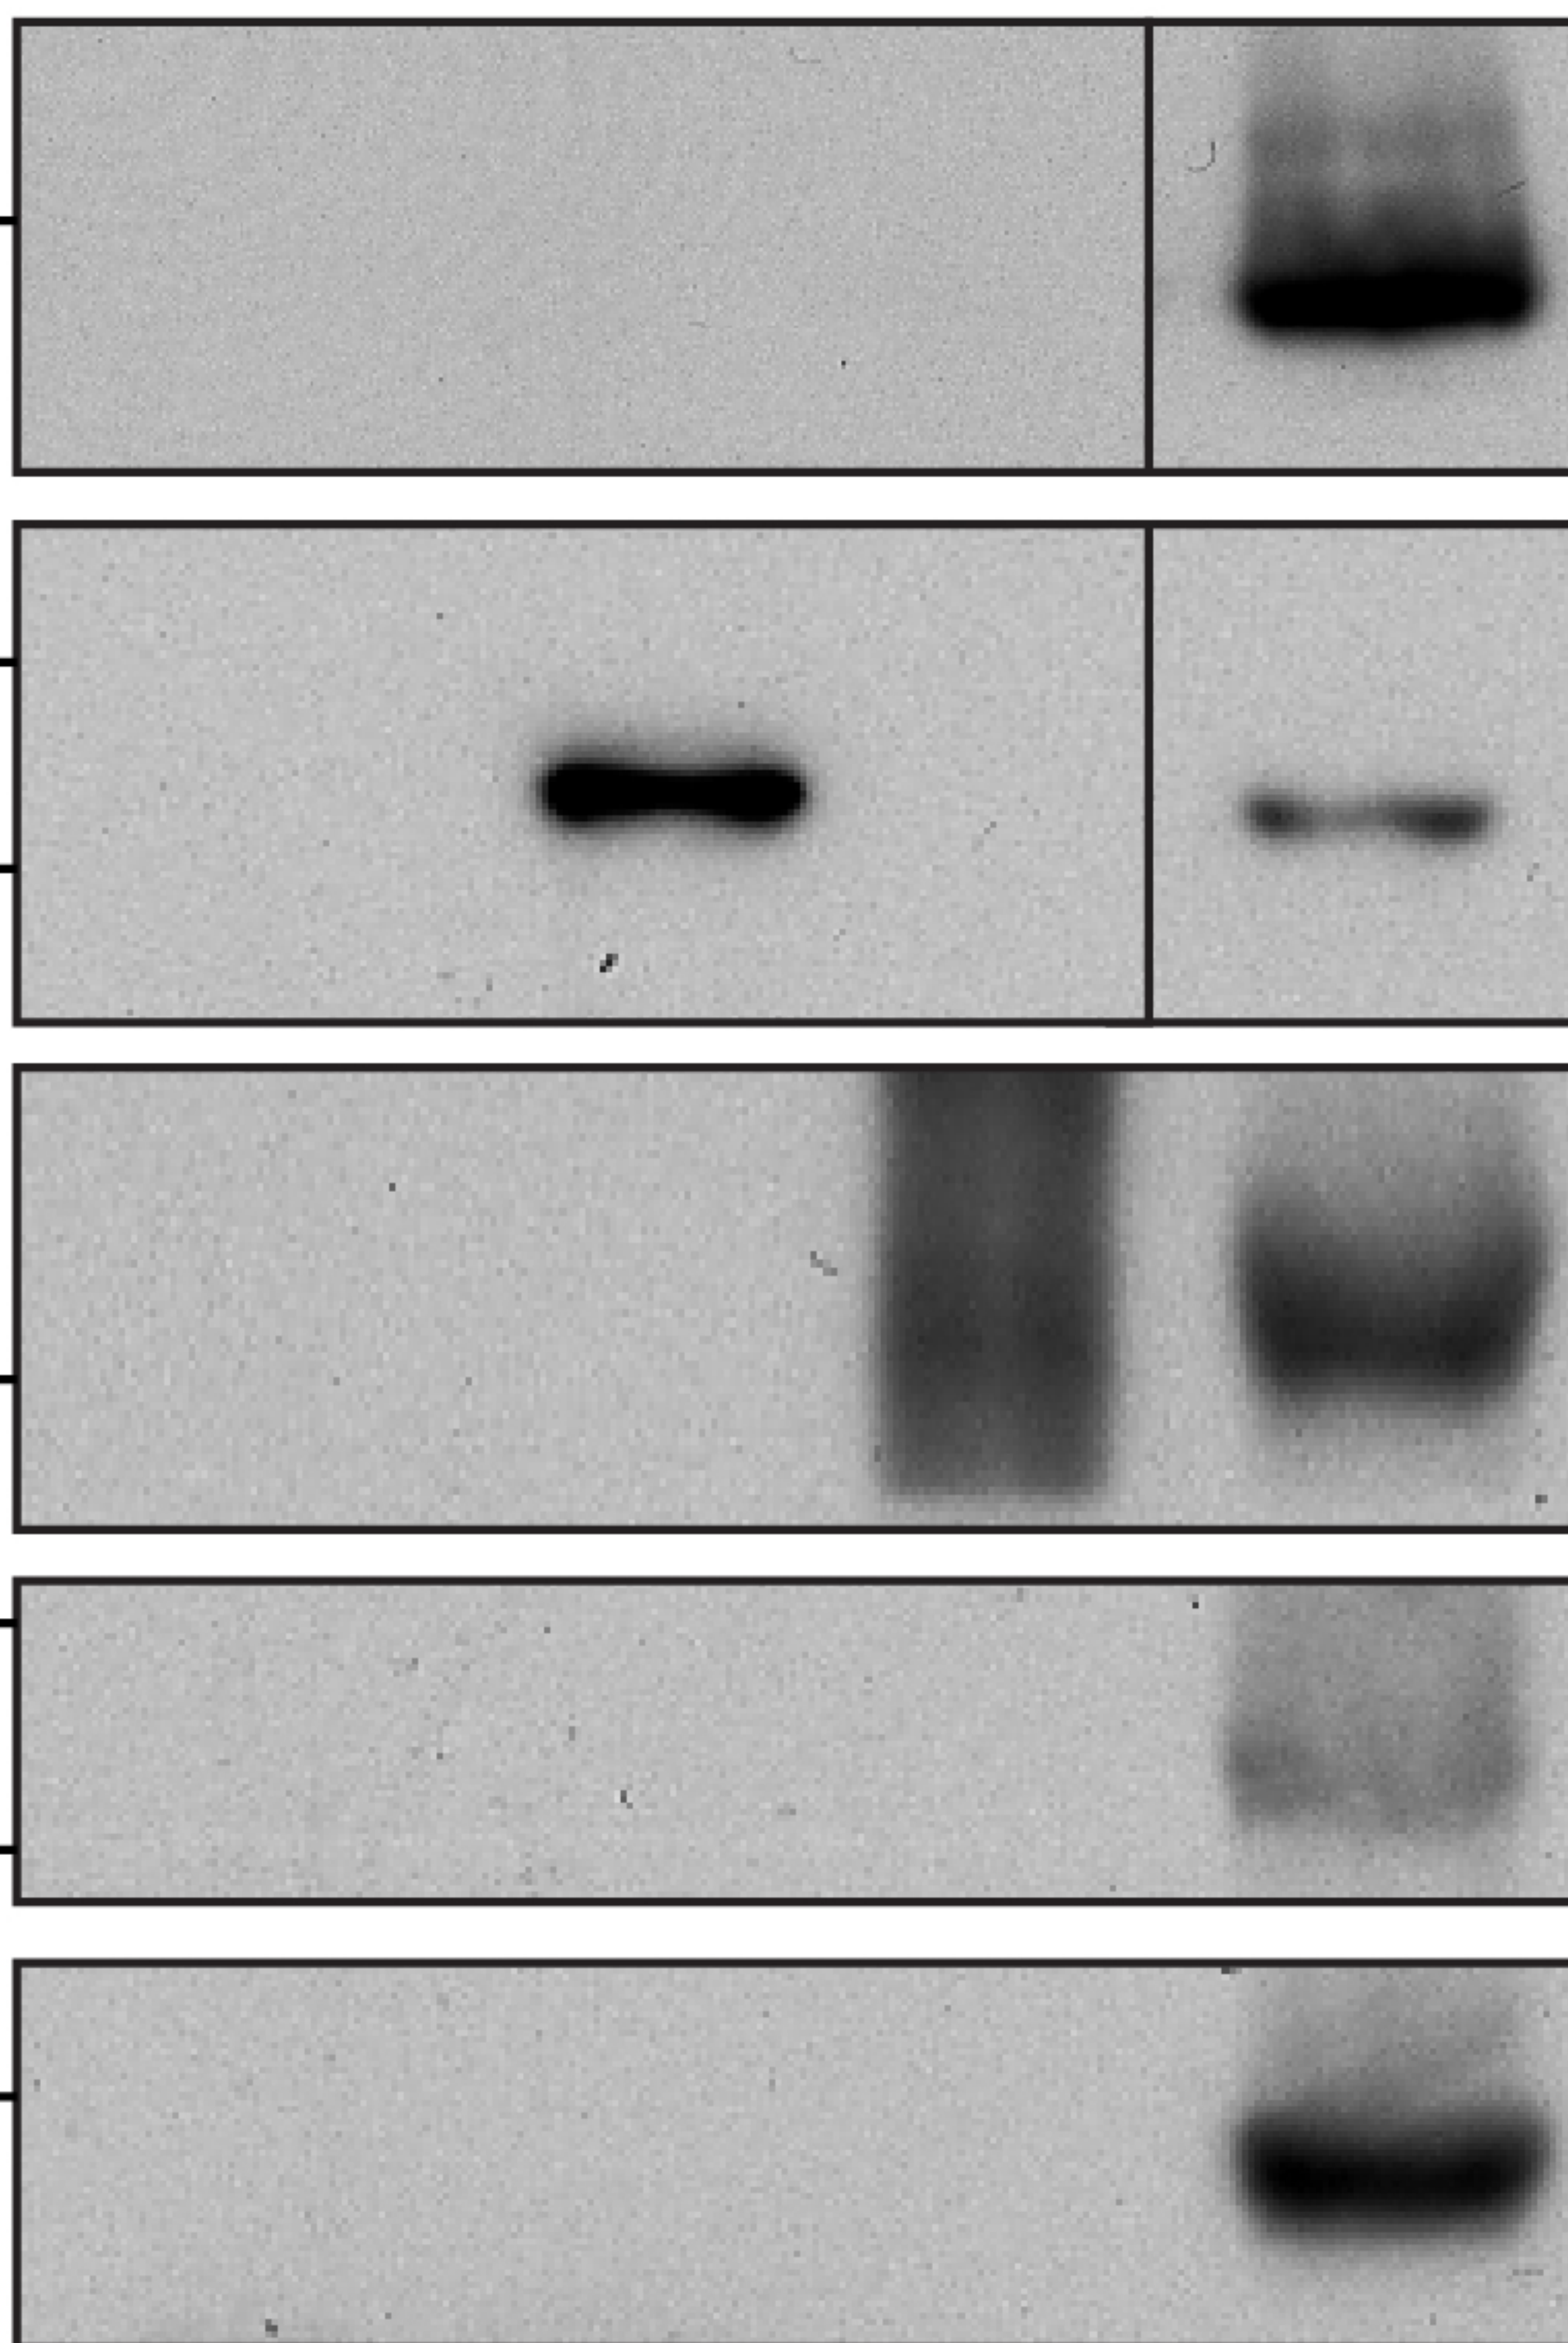

Supplement: supp [file elife-18825-supp-v1.zip]

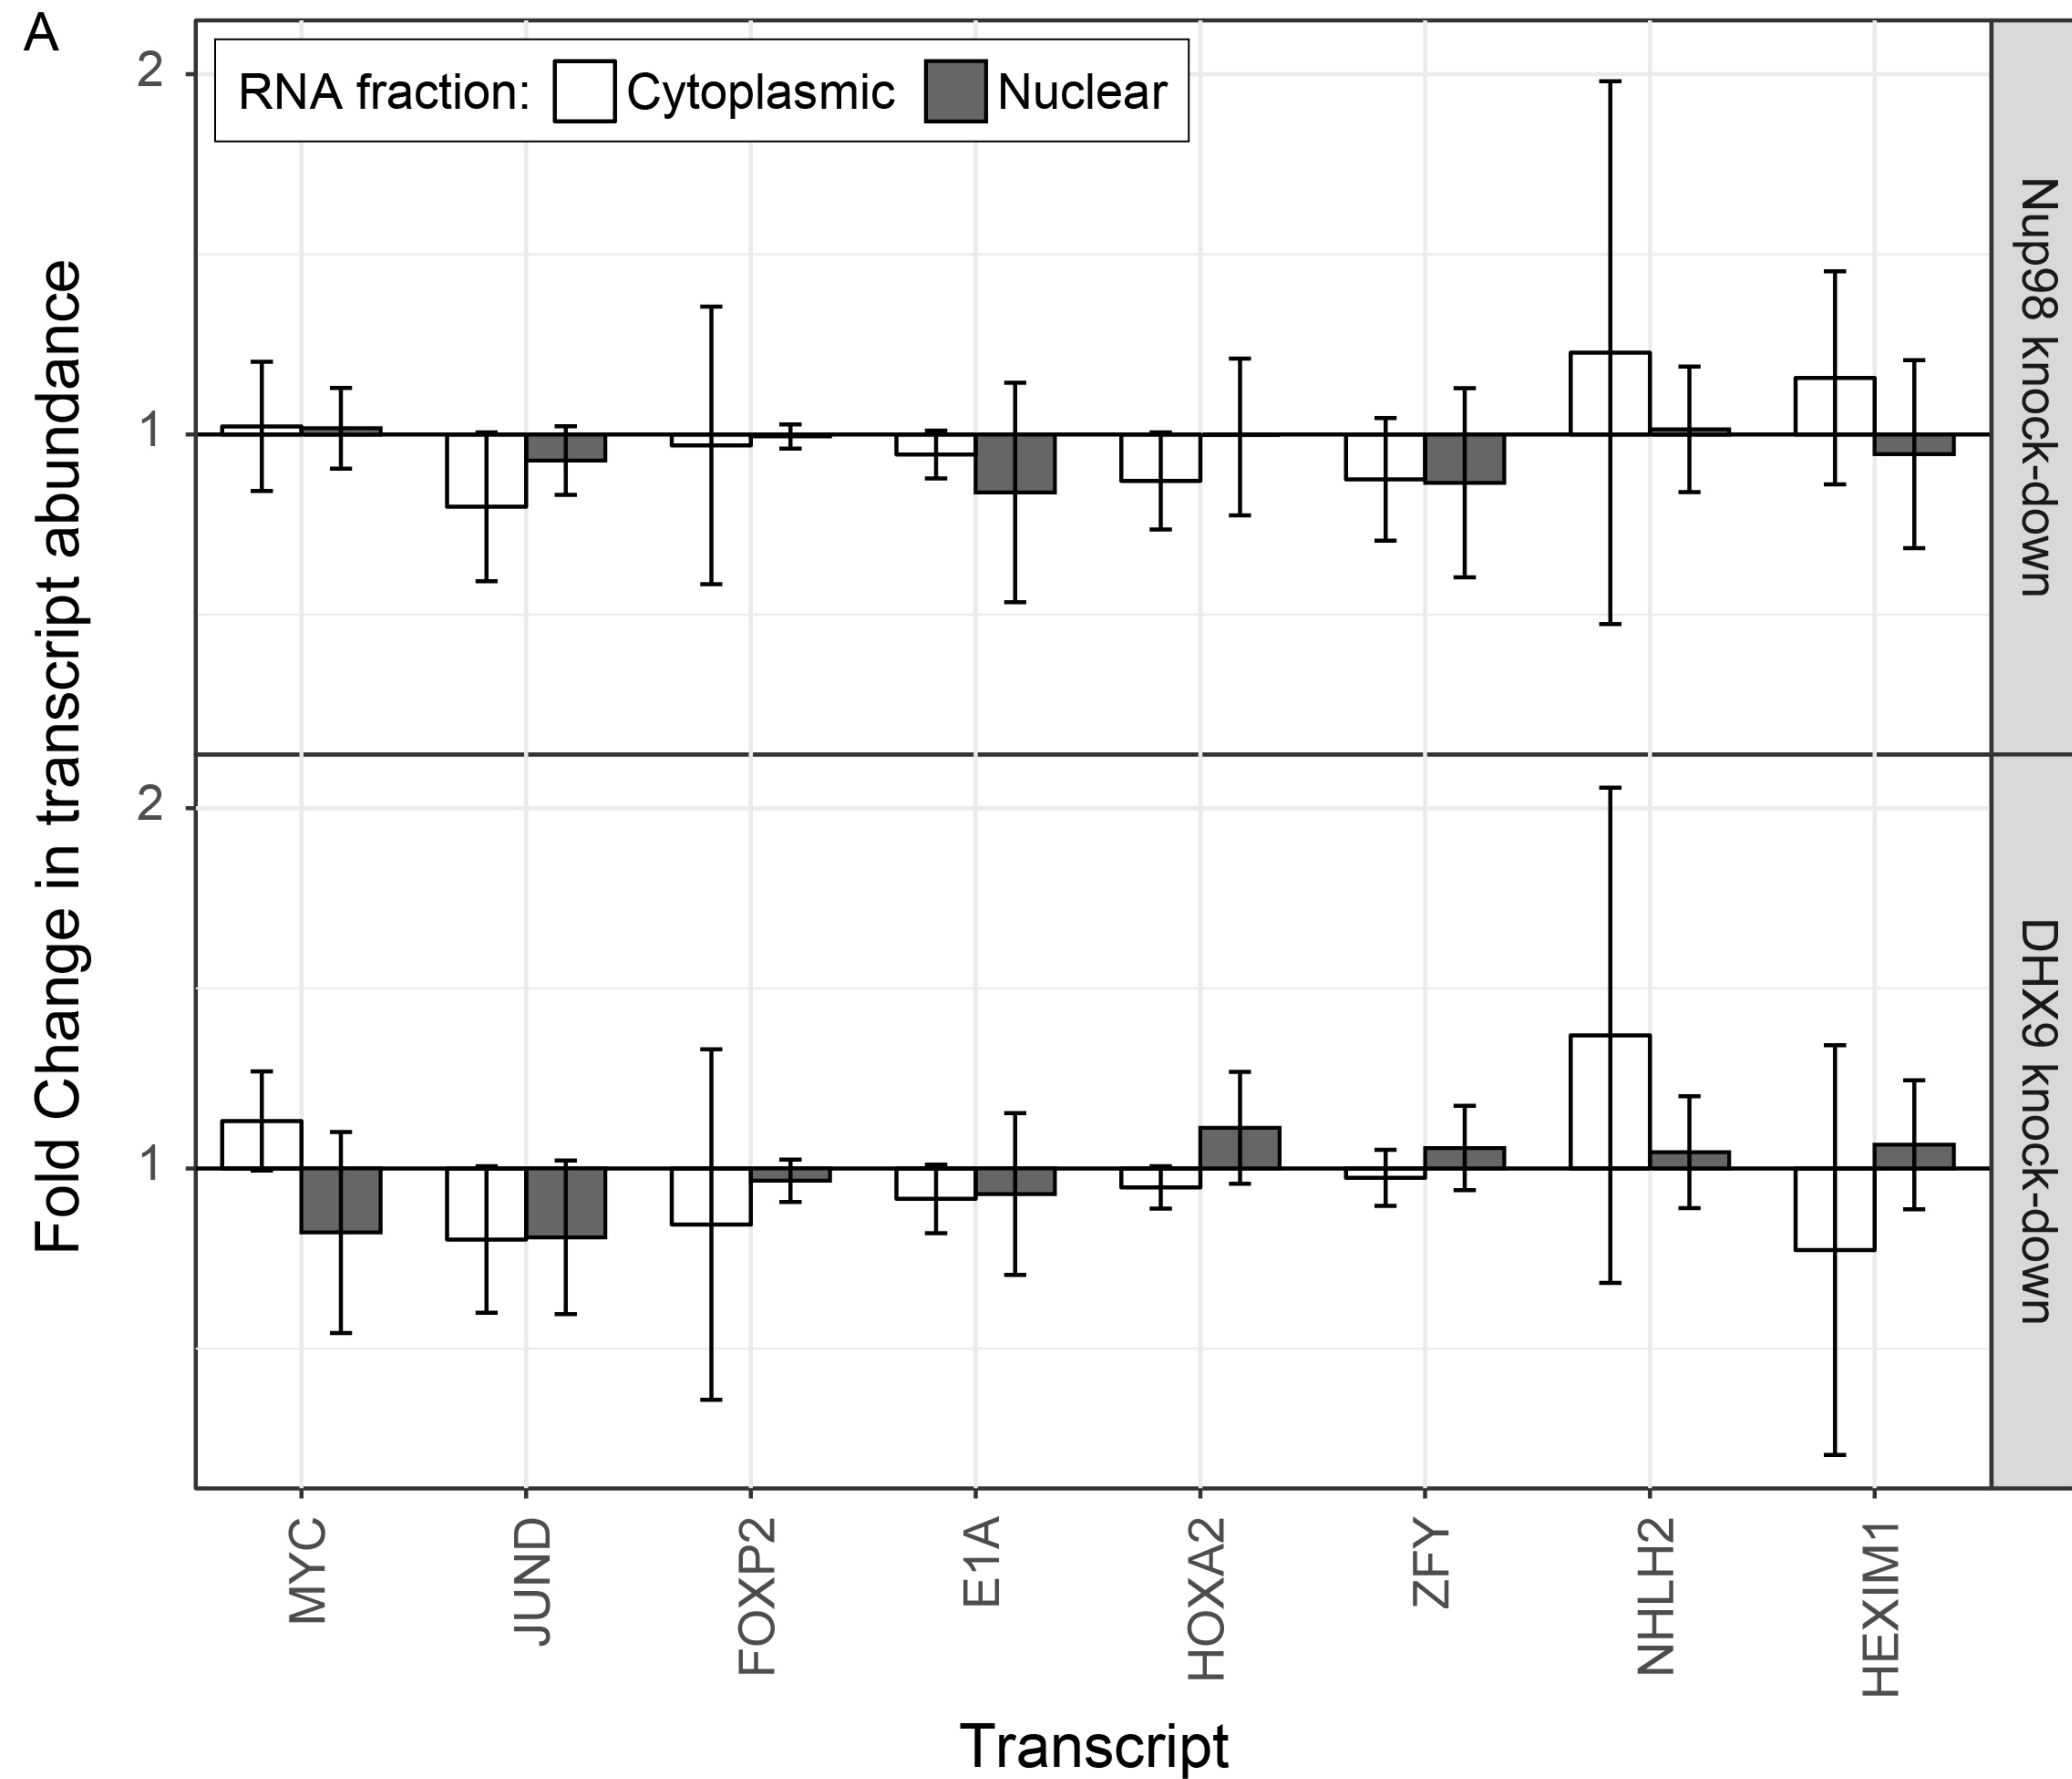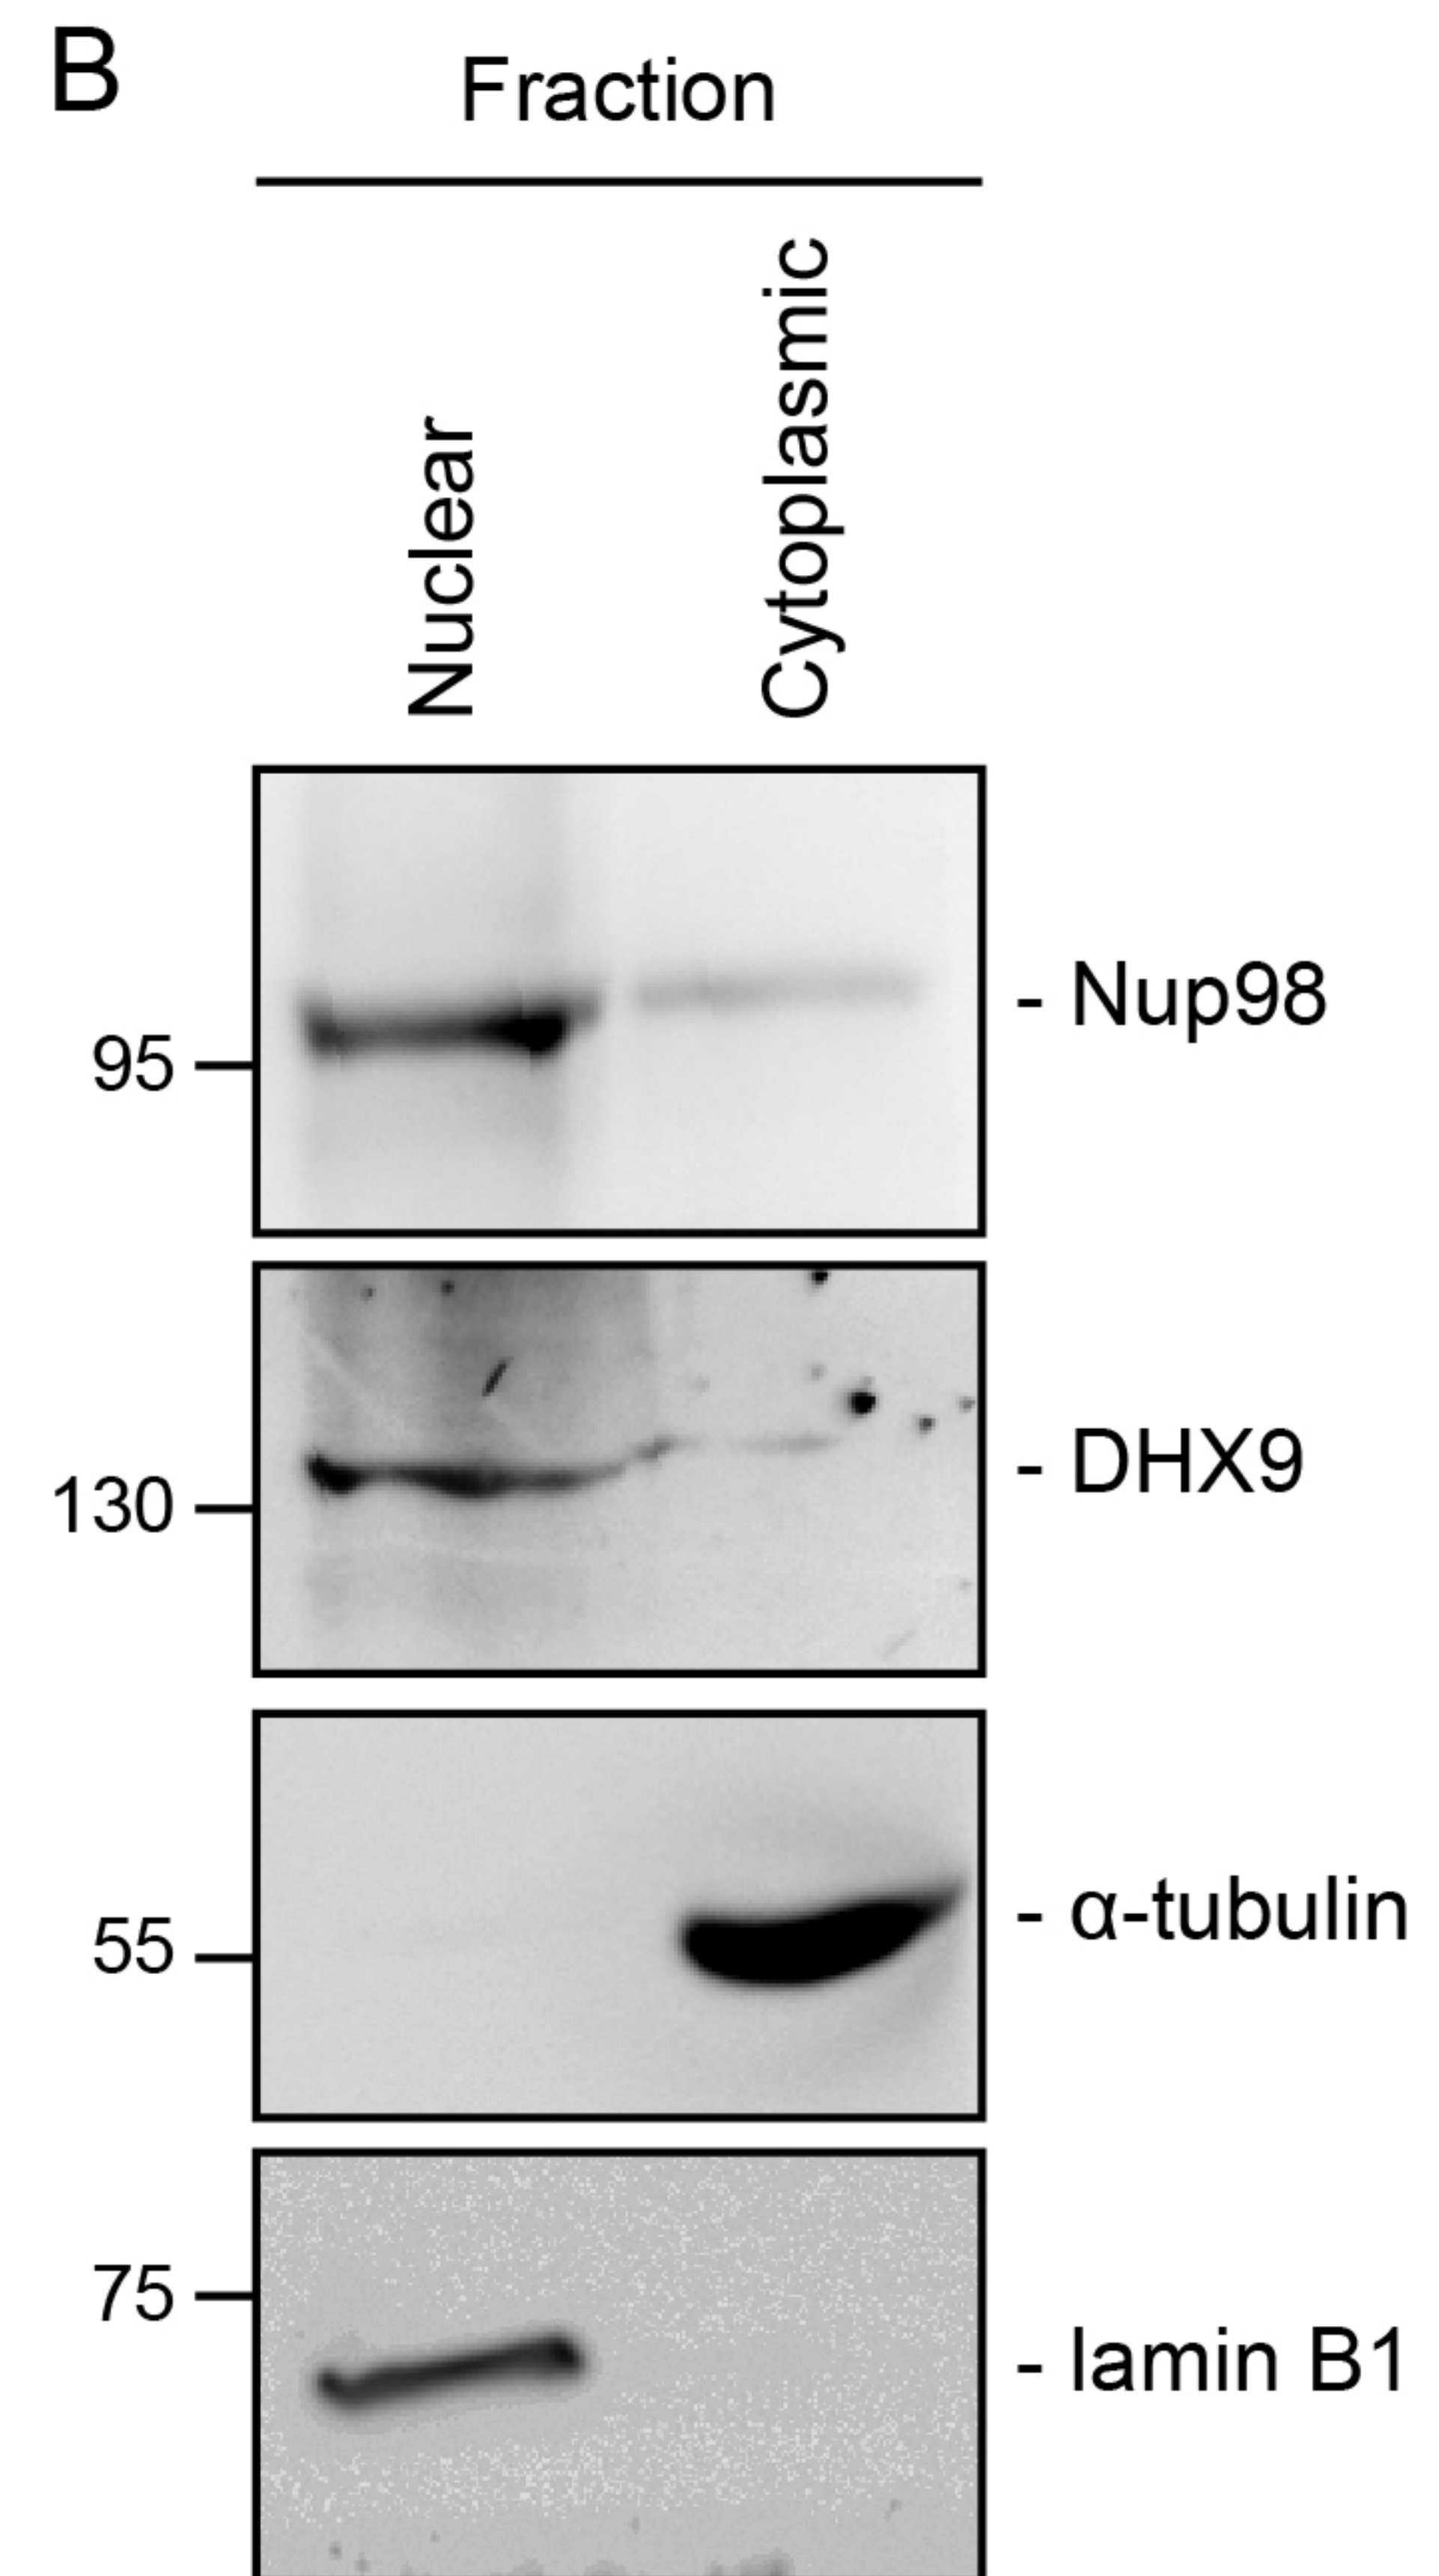

Supplement: supp [file elife-18825-supp-v1.zip]

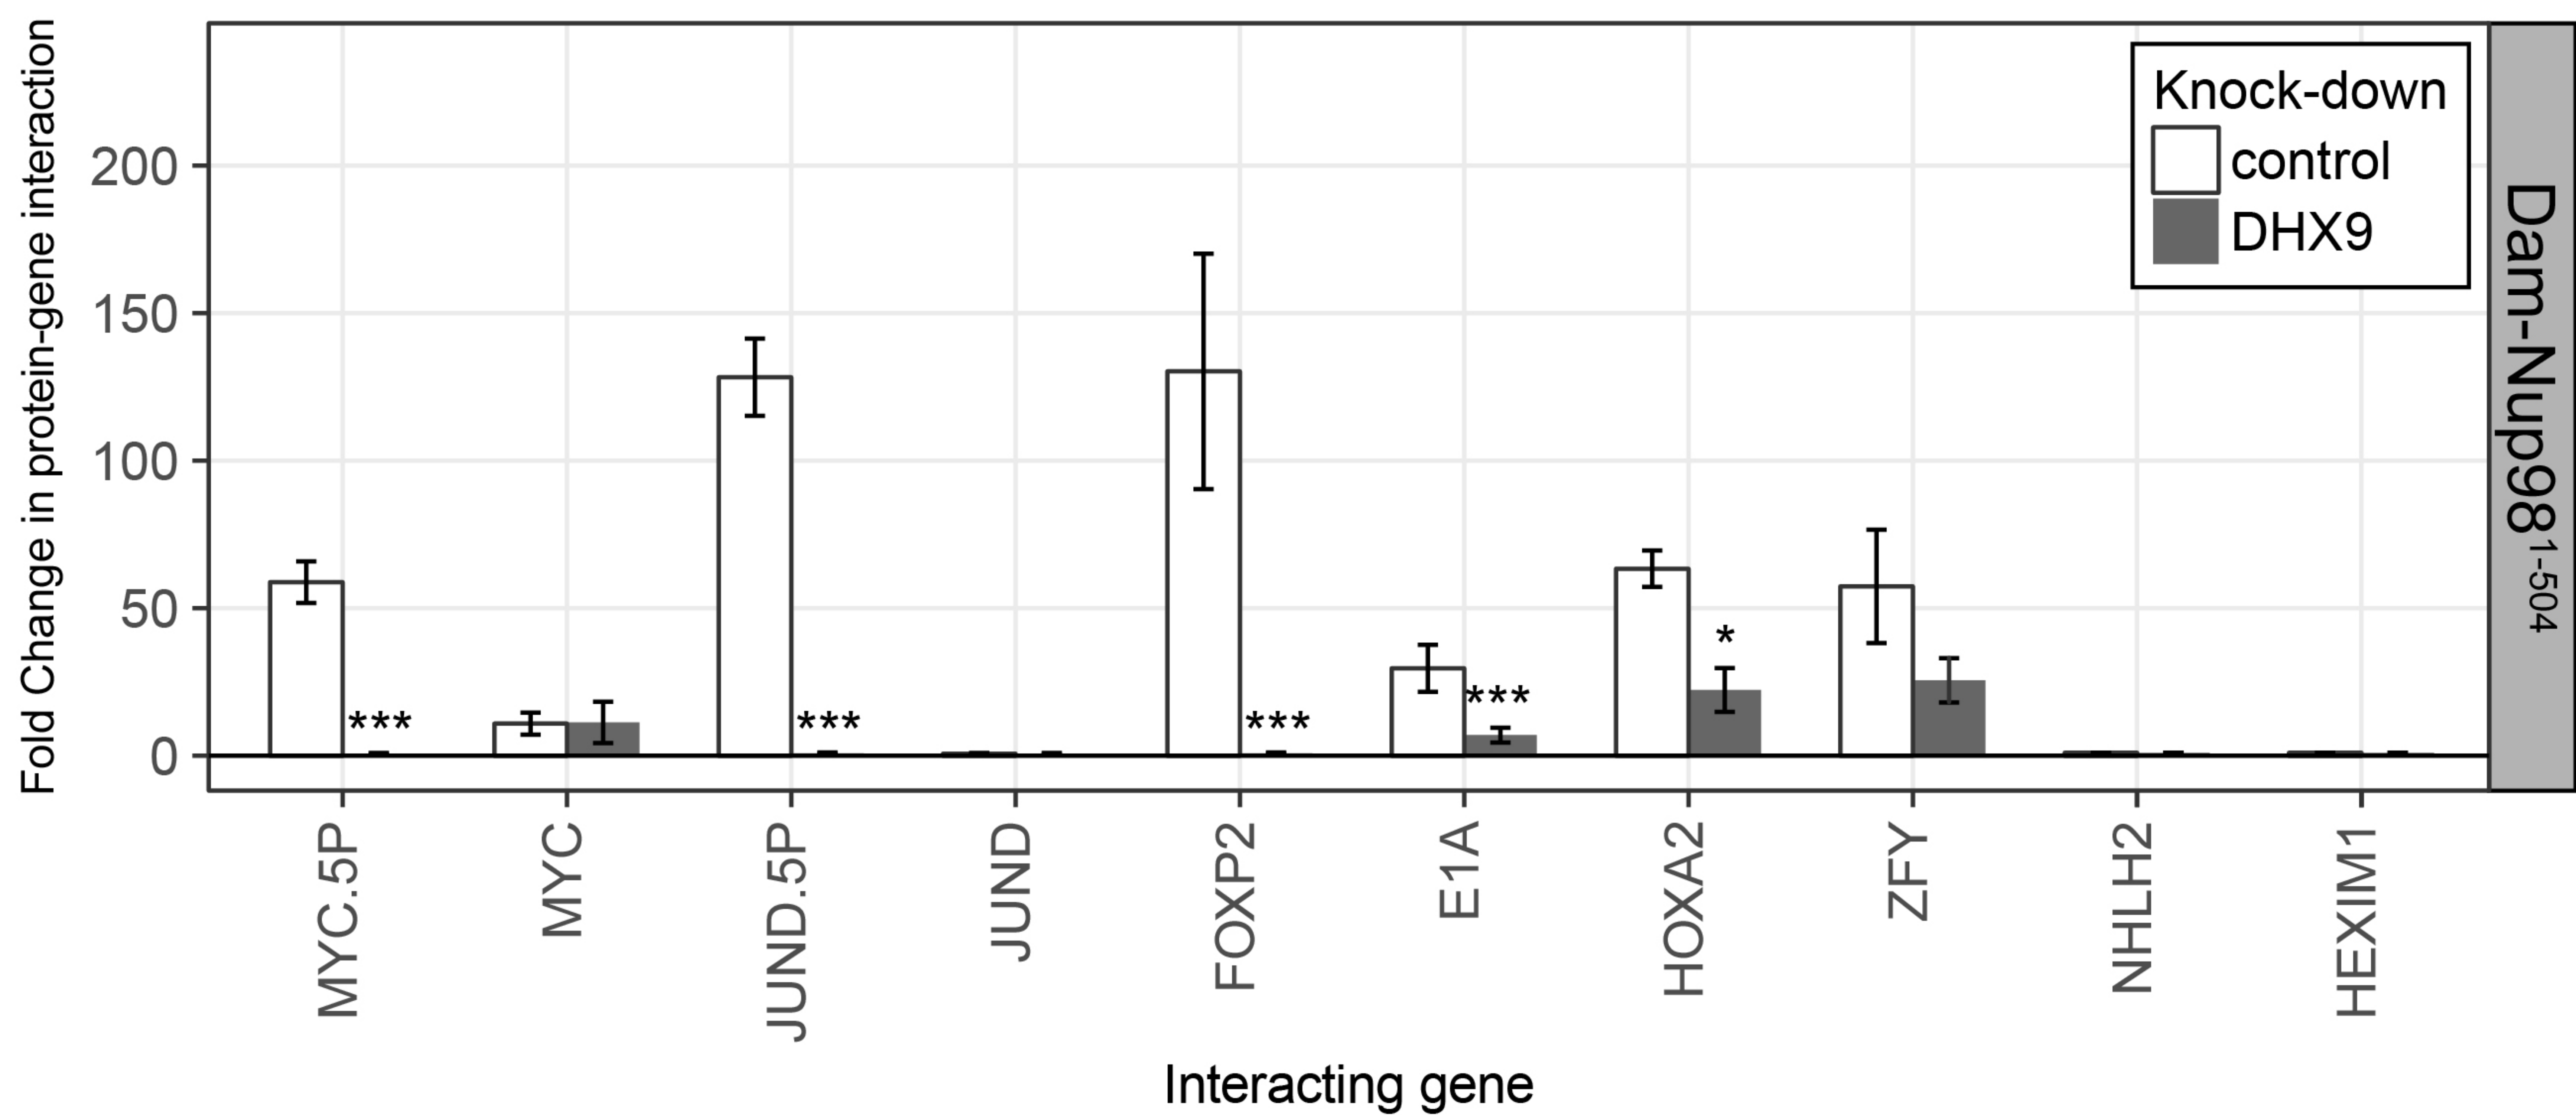

Supplement: supp [file elife-18825-supp-v1.zip]

GFP

GFP-Nup98

170

130

- DHX9

170

130

- hnRNP U

170

130

- GFP-Nup98

95

- Nup98

34

- GFP

55

-  $\alpha$ -tubulin

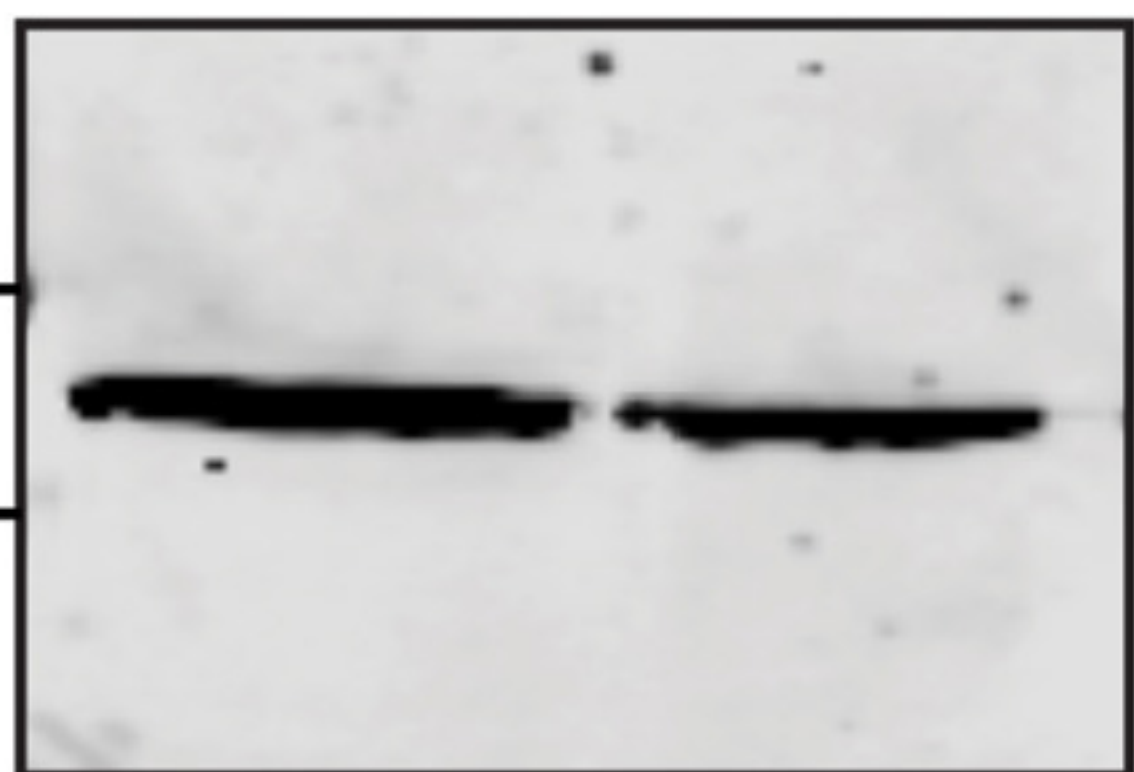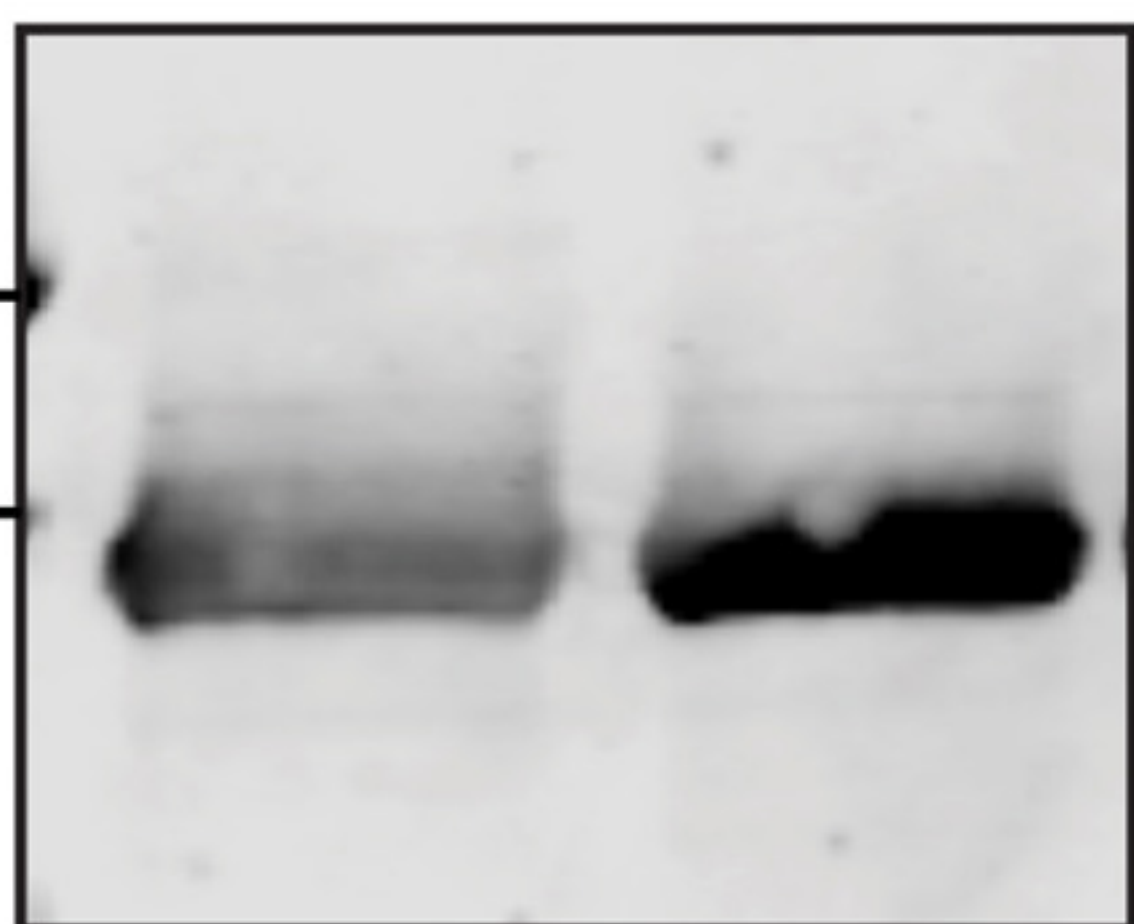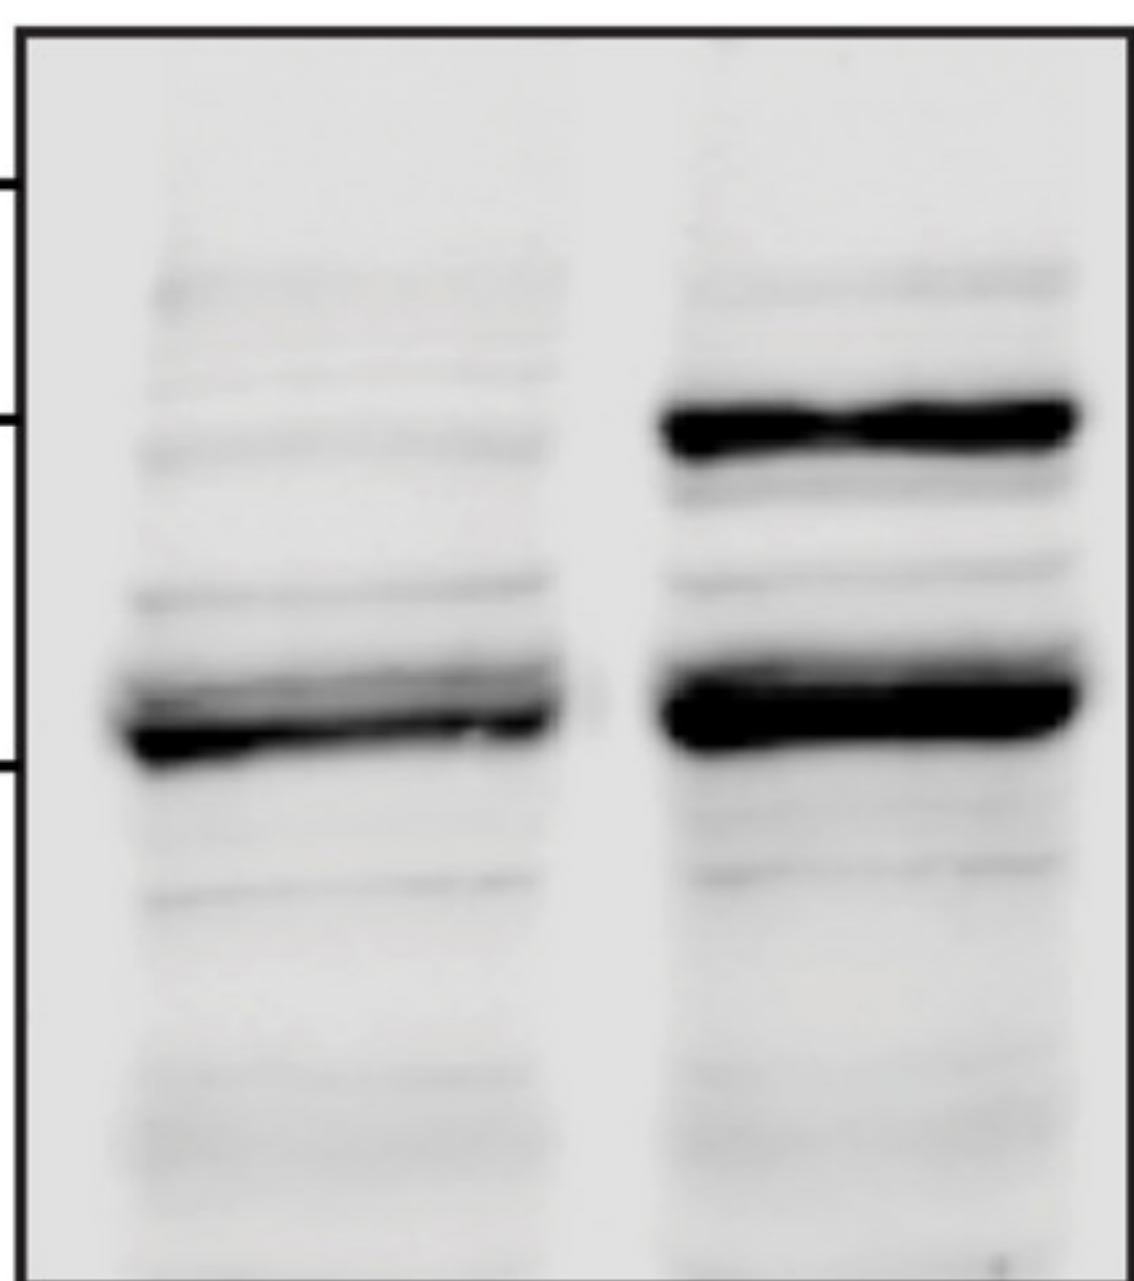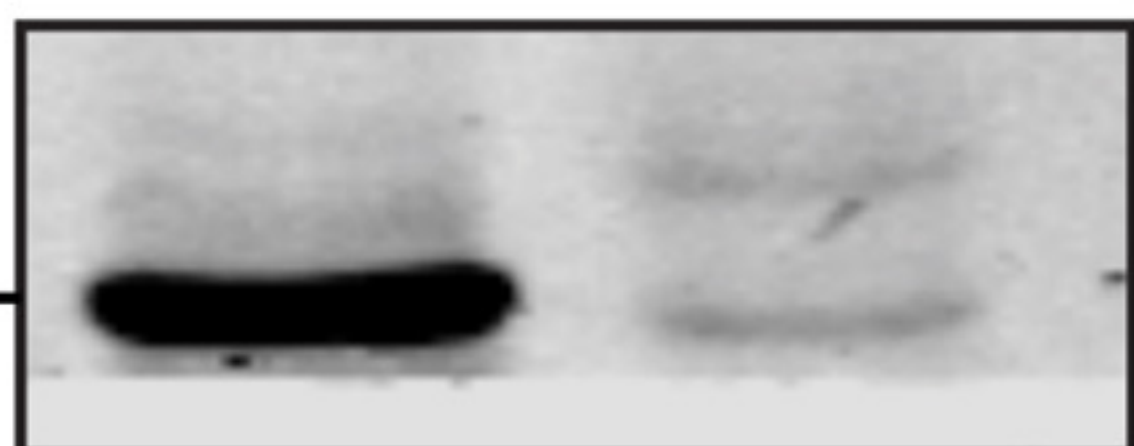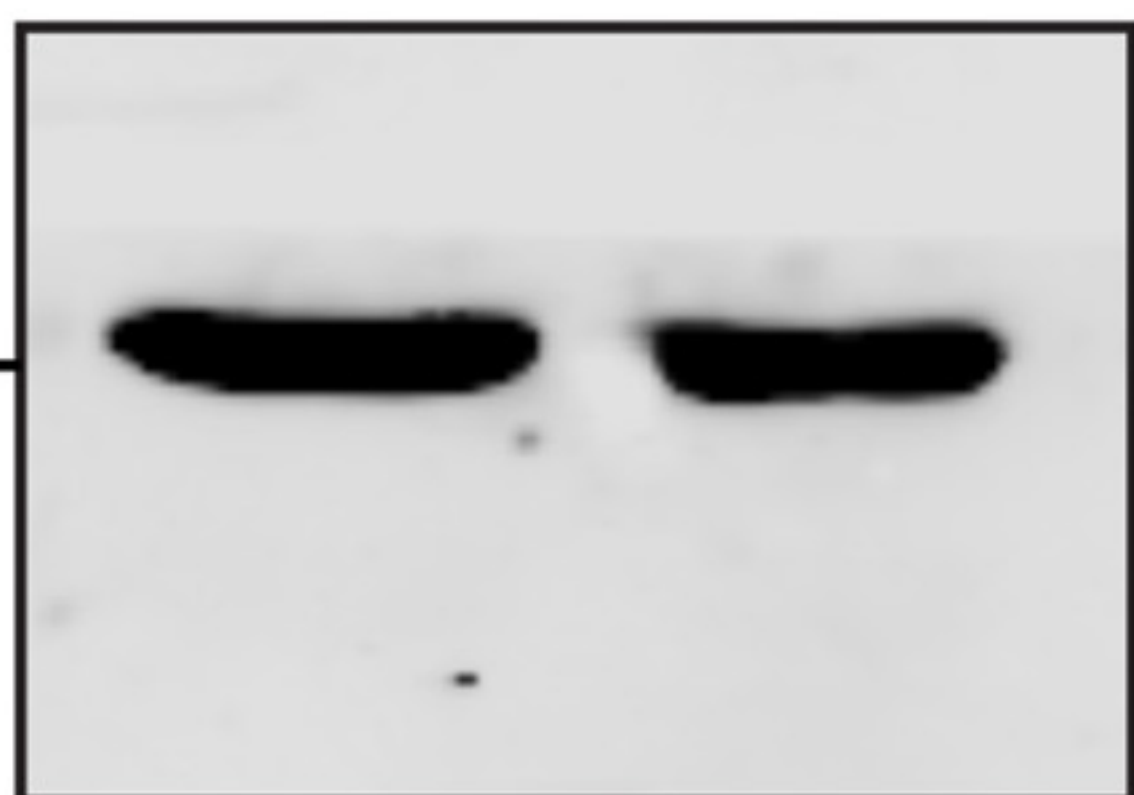

Supplement: supp [file elife-18825-supp-v1.zip]

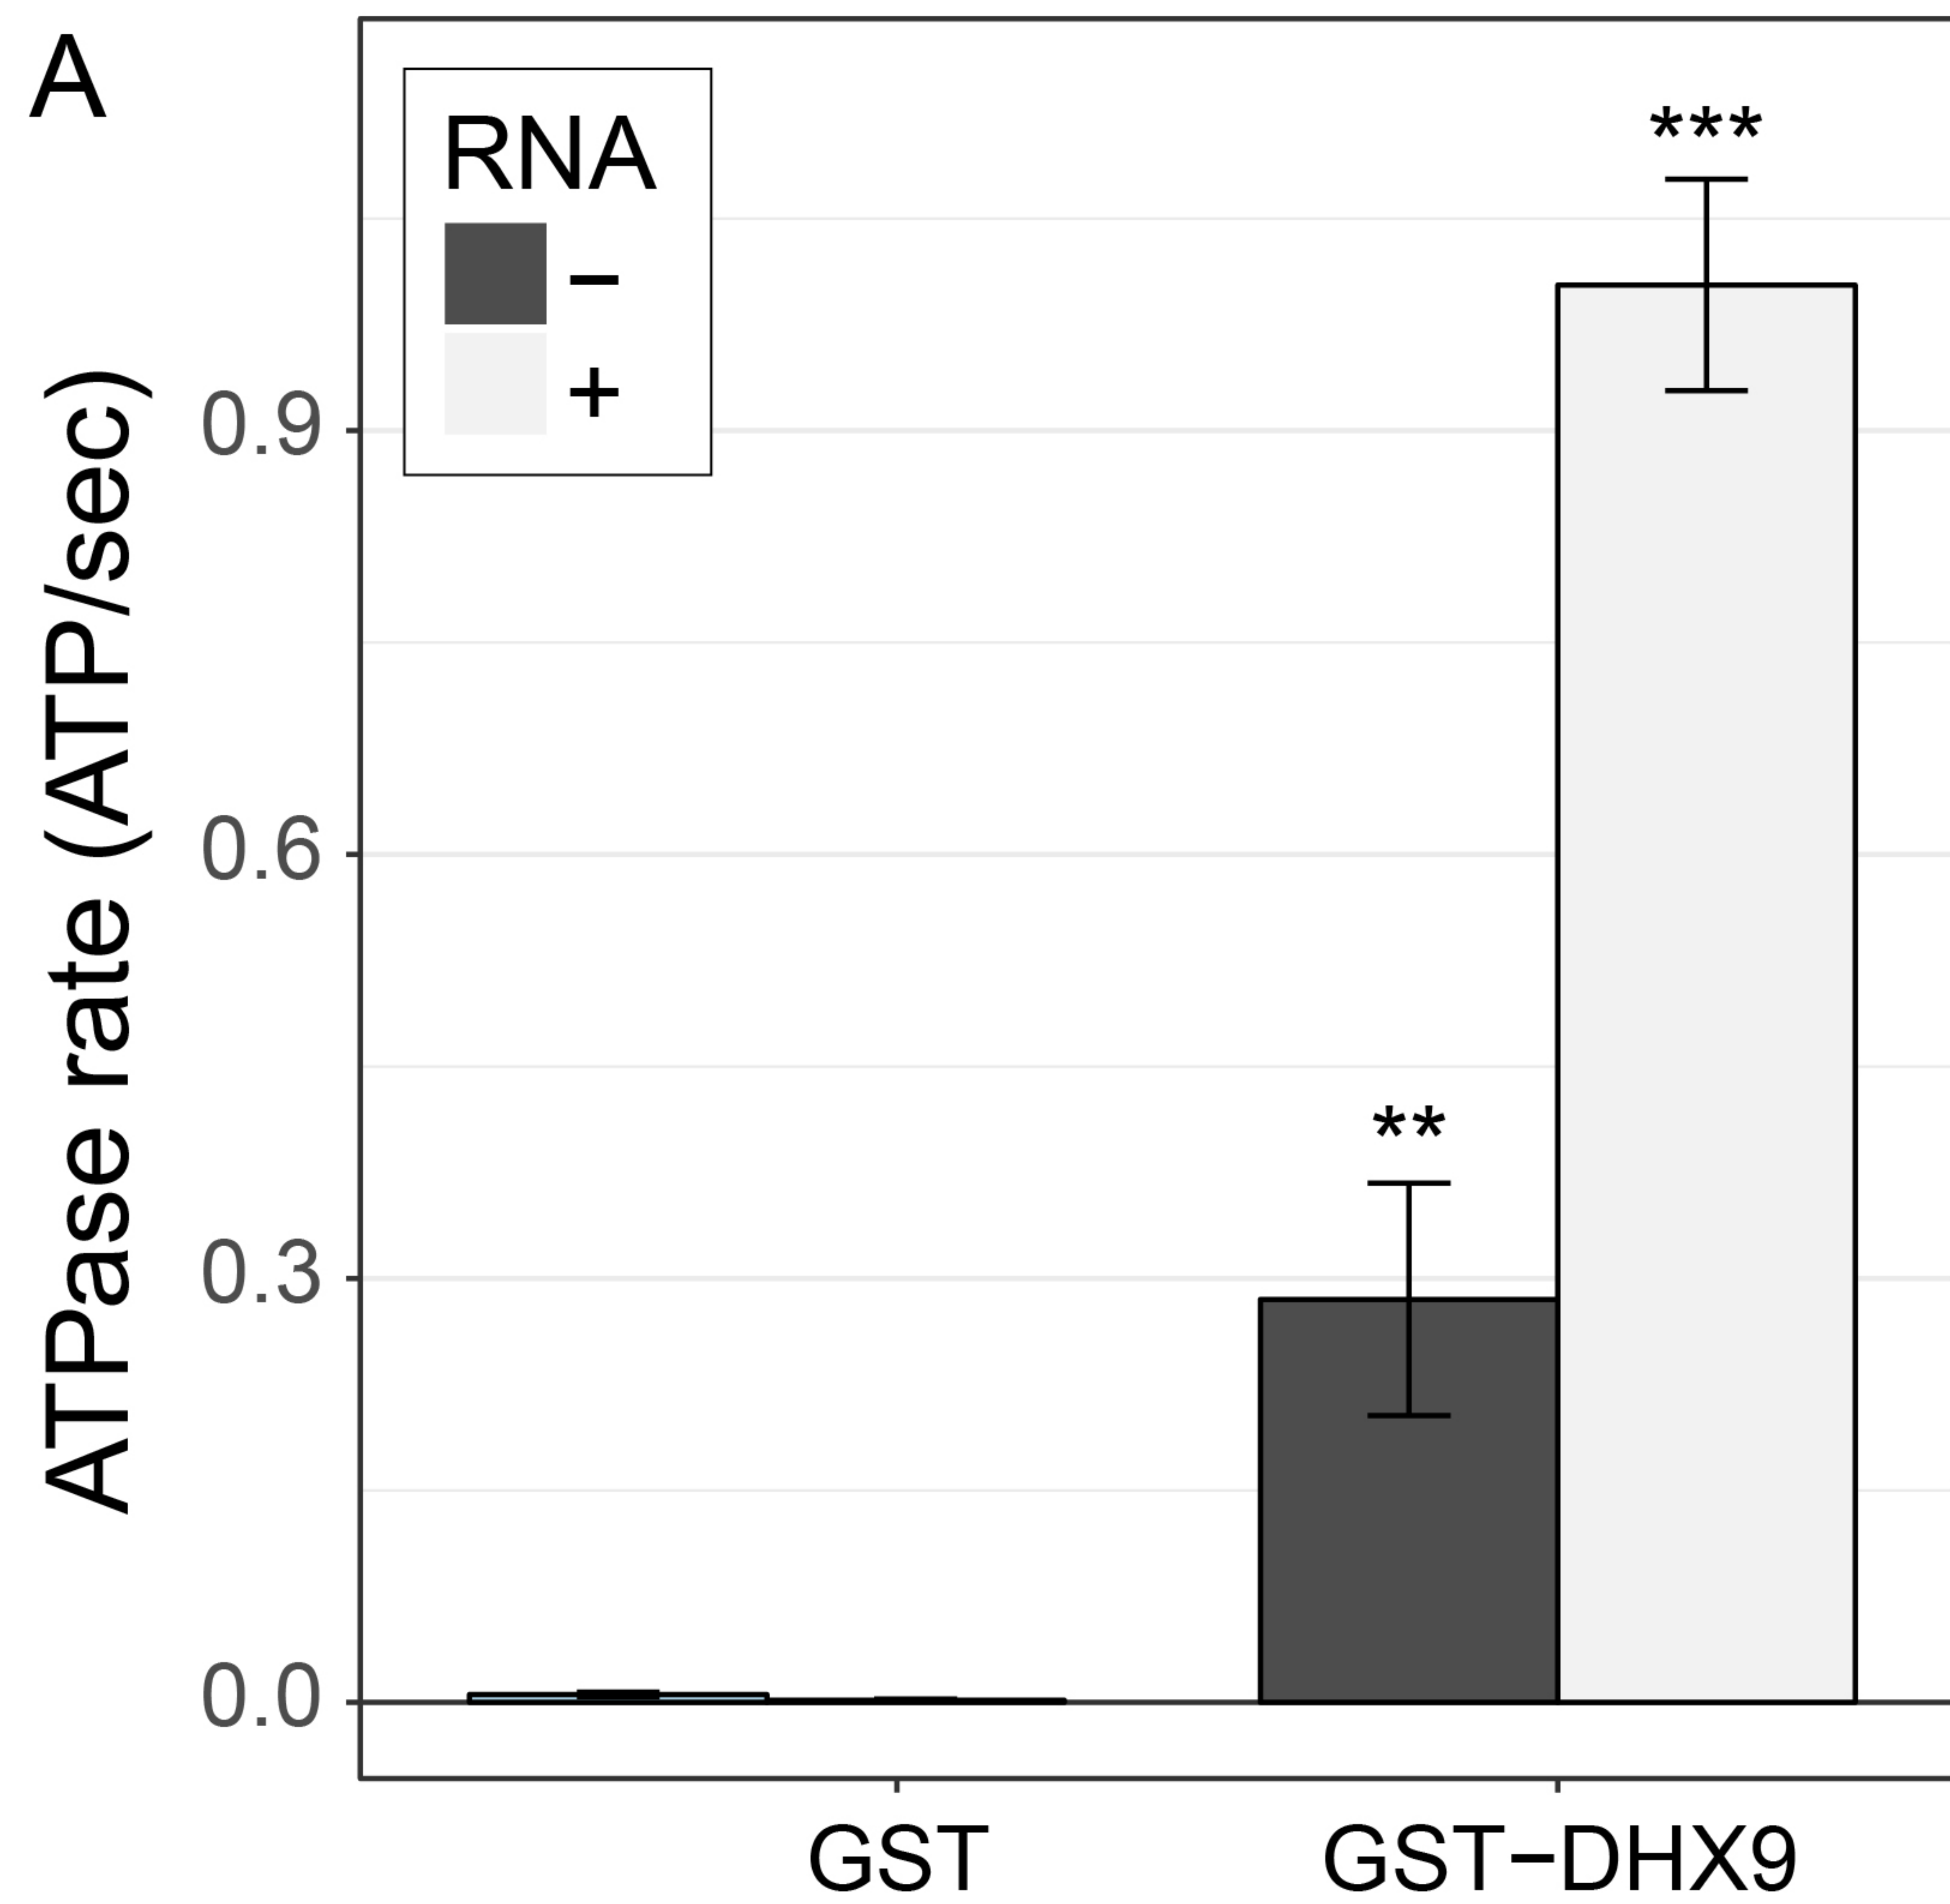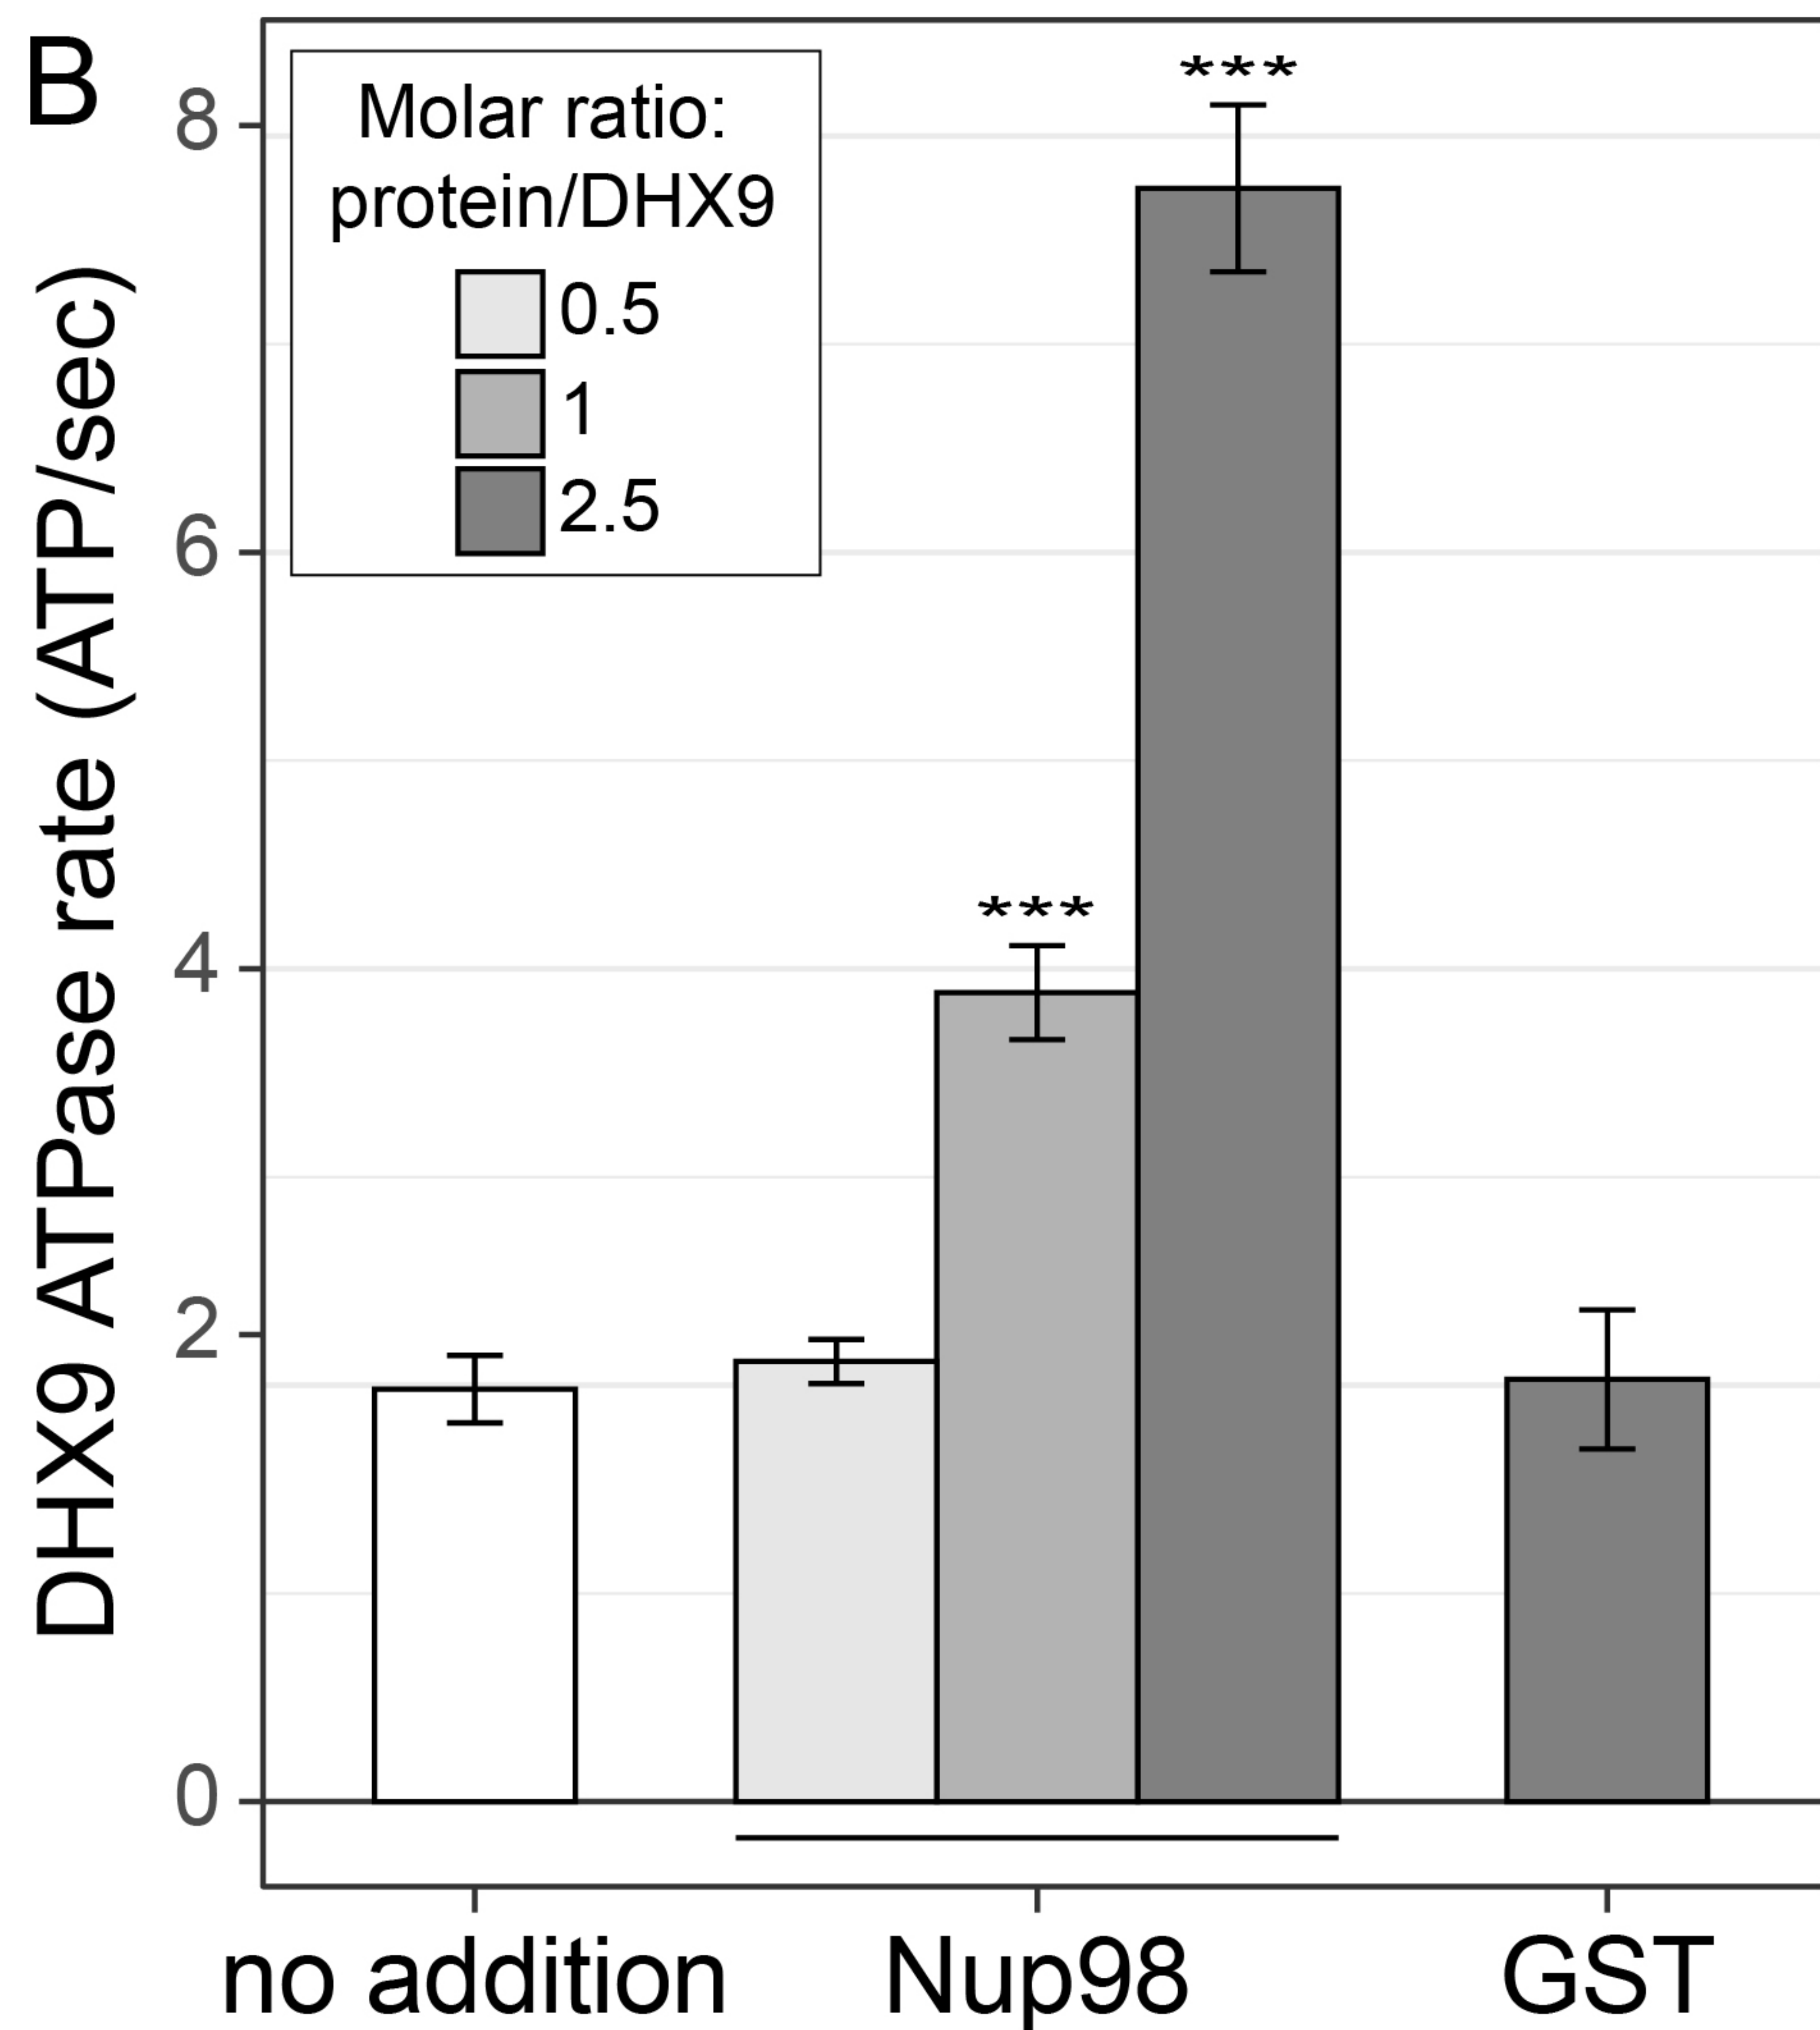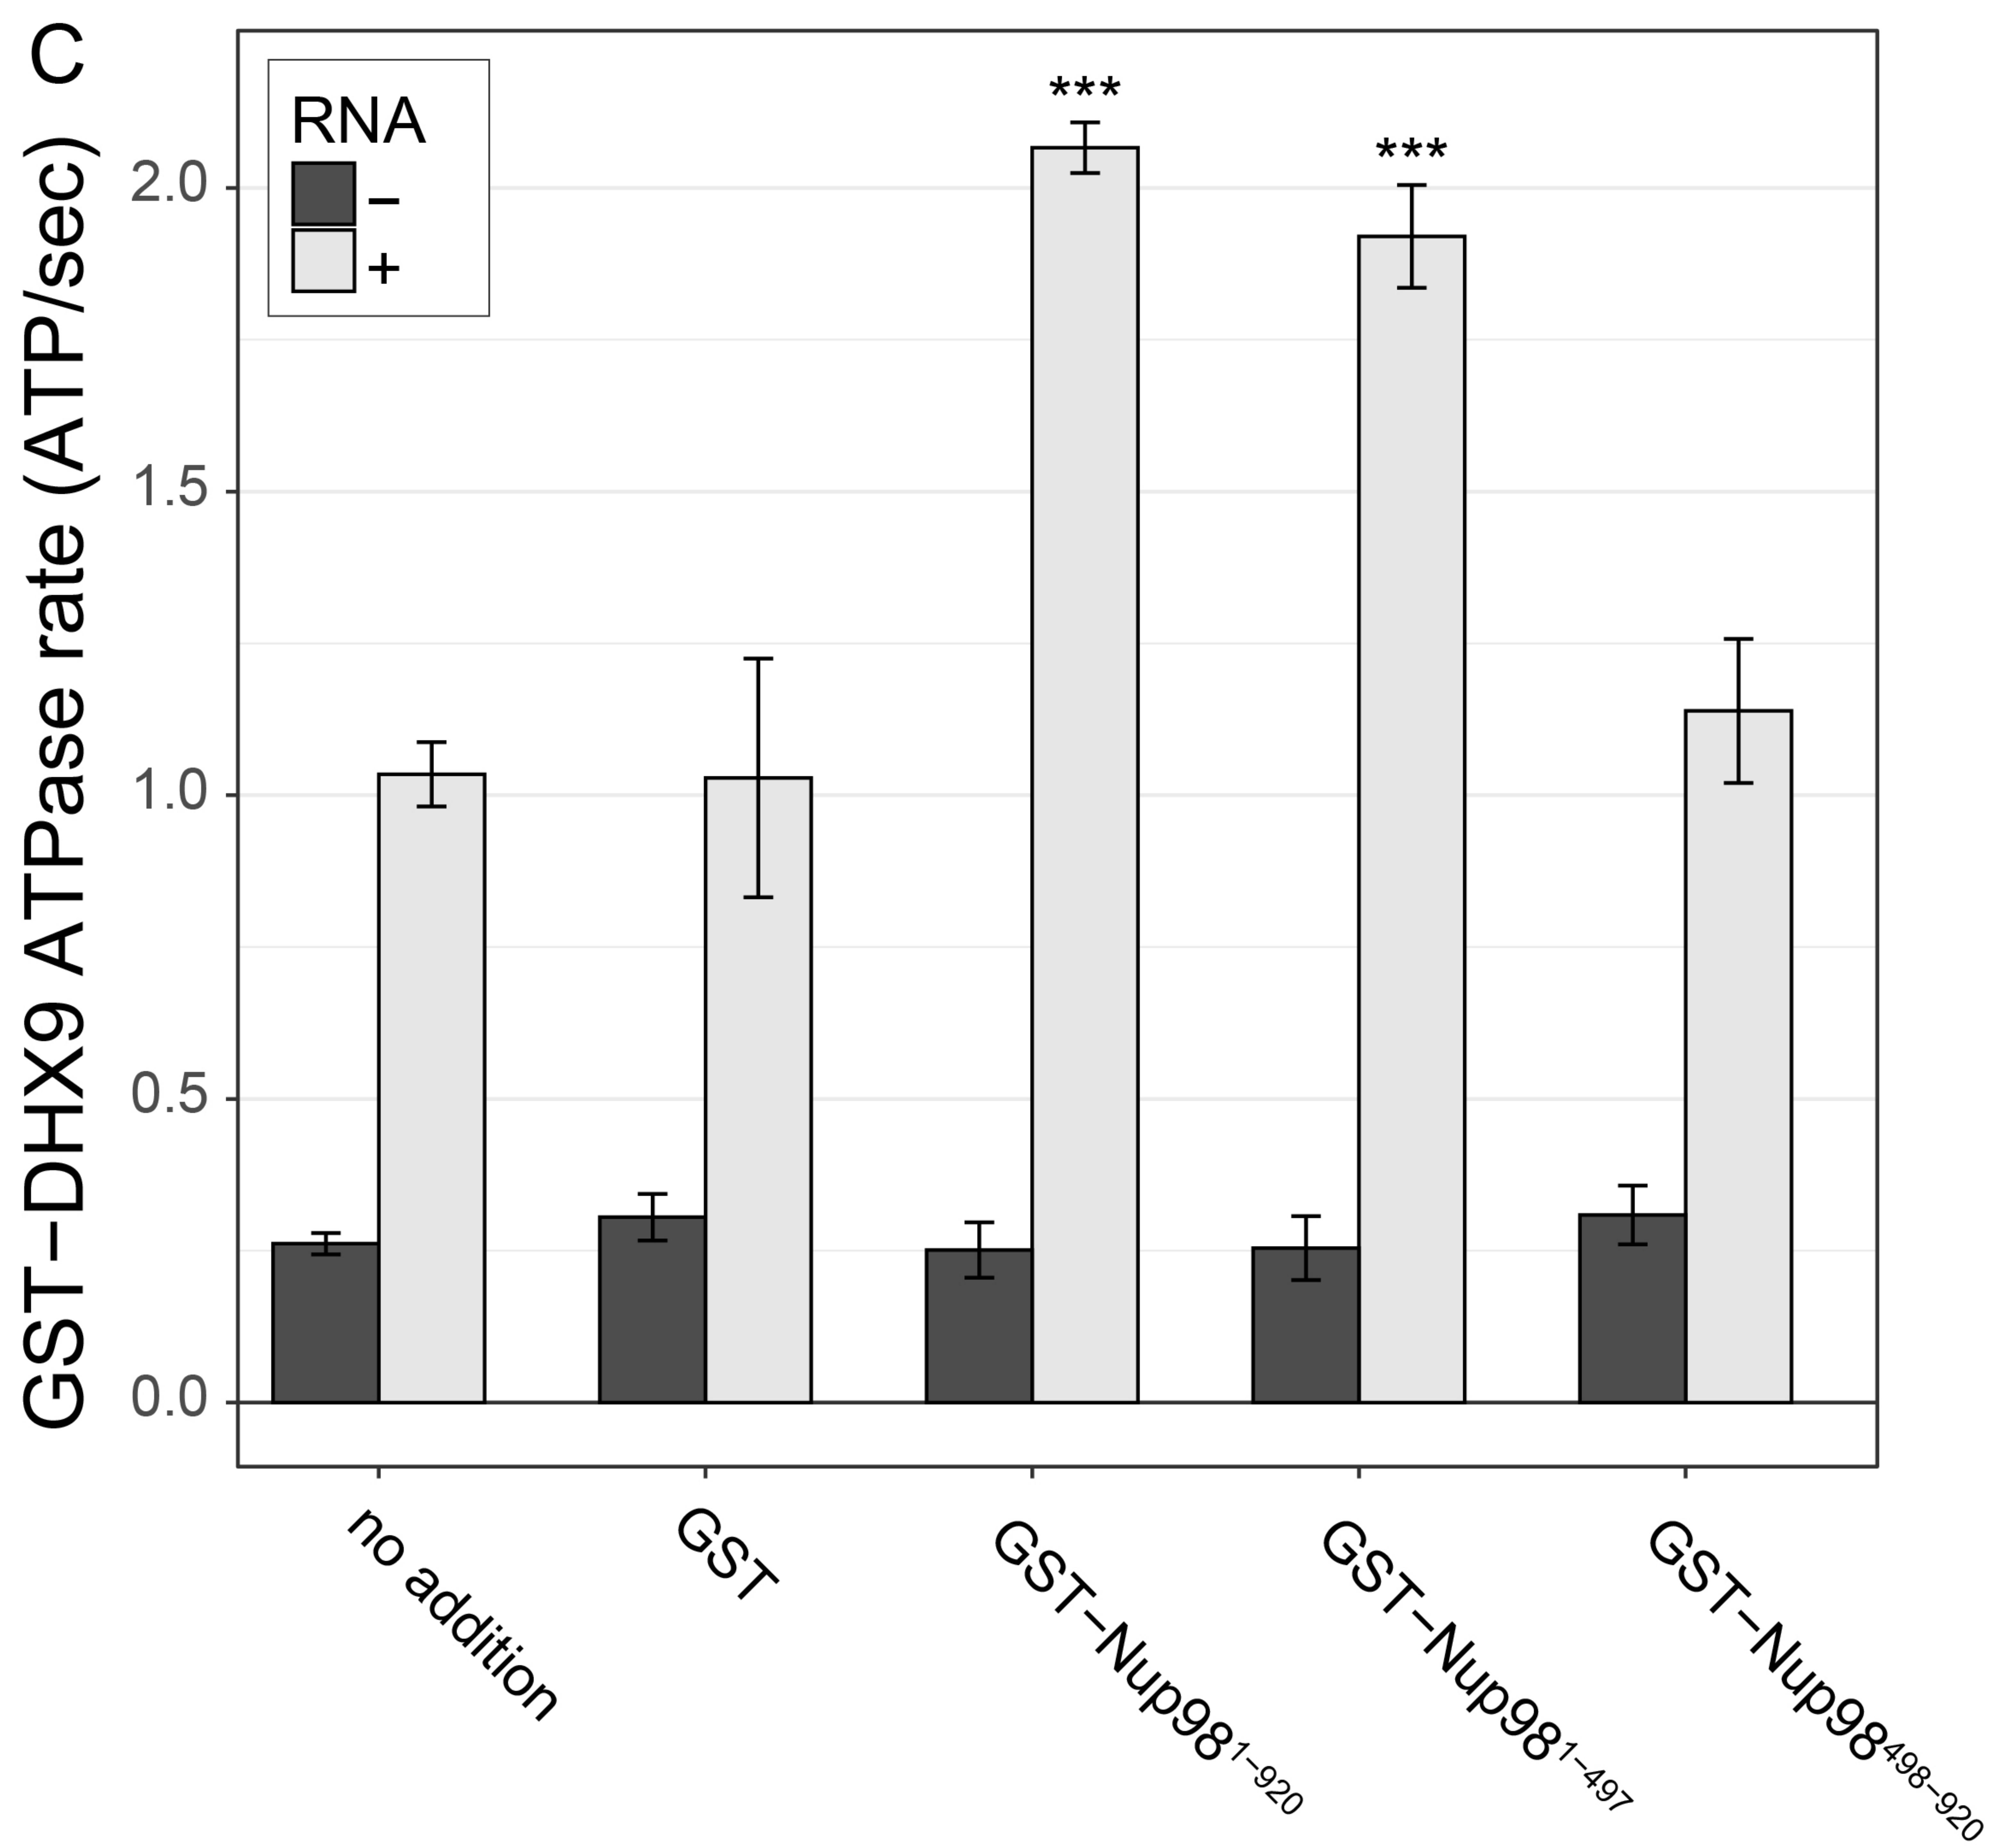

Supplement: supp [file elife-18825-supp-v1.zip]

**A** GFP-Nup98<sup>1-497</sup> expression

DHX9

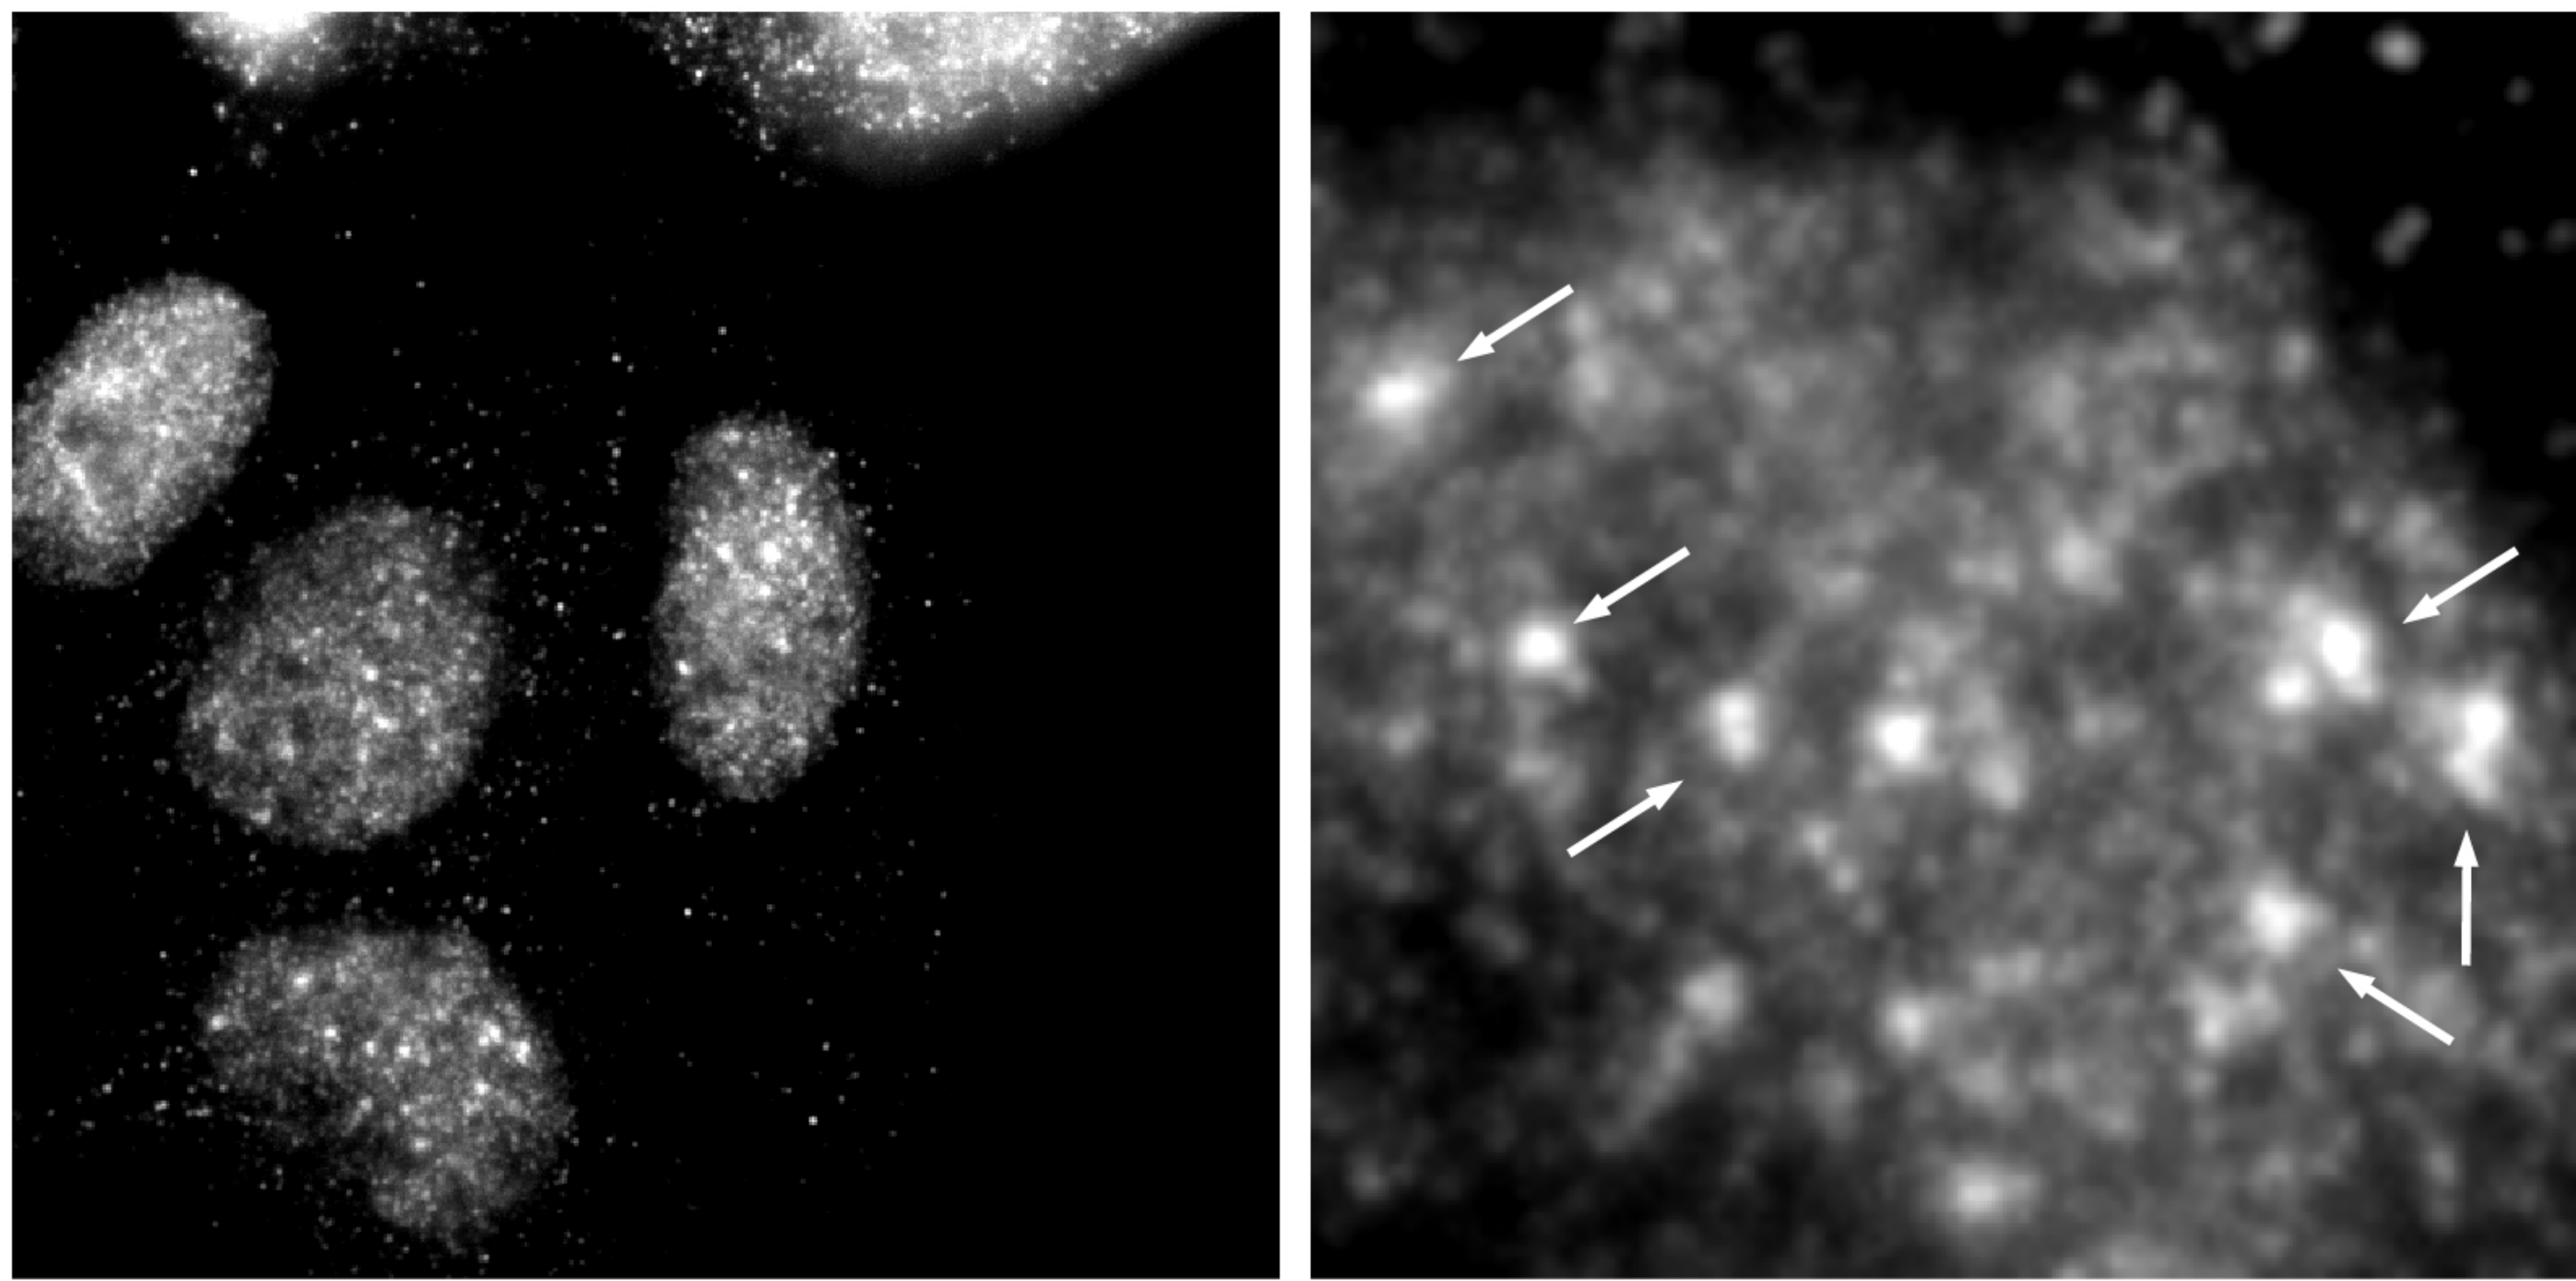

GFP-Nup98<sup>1-497</sup>

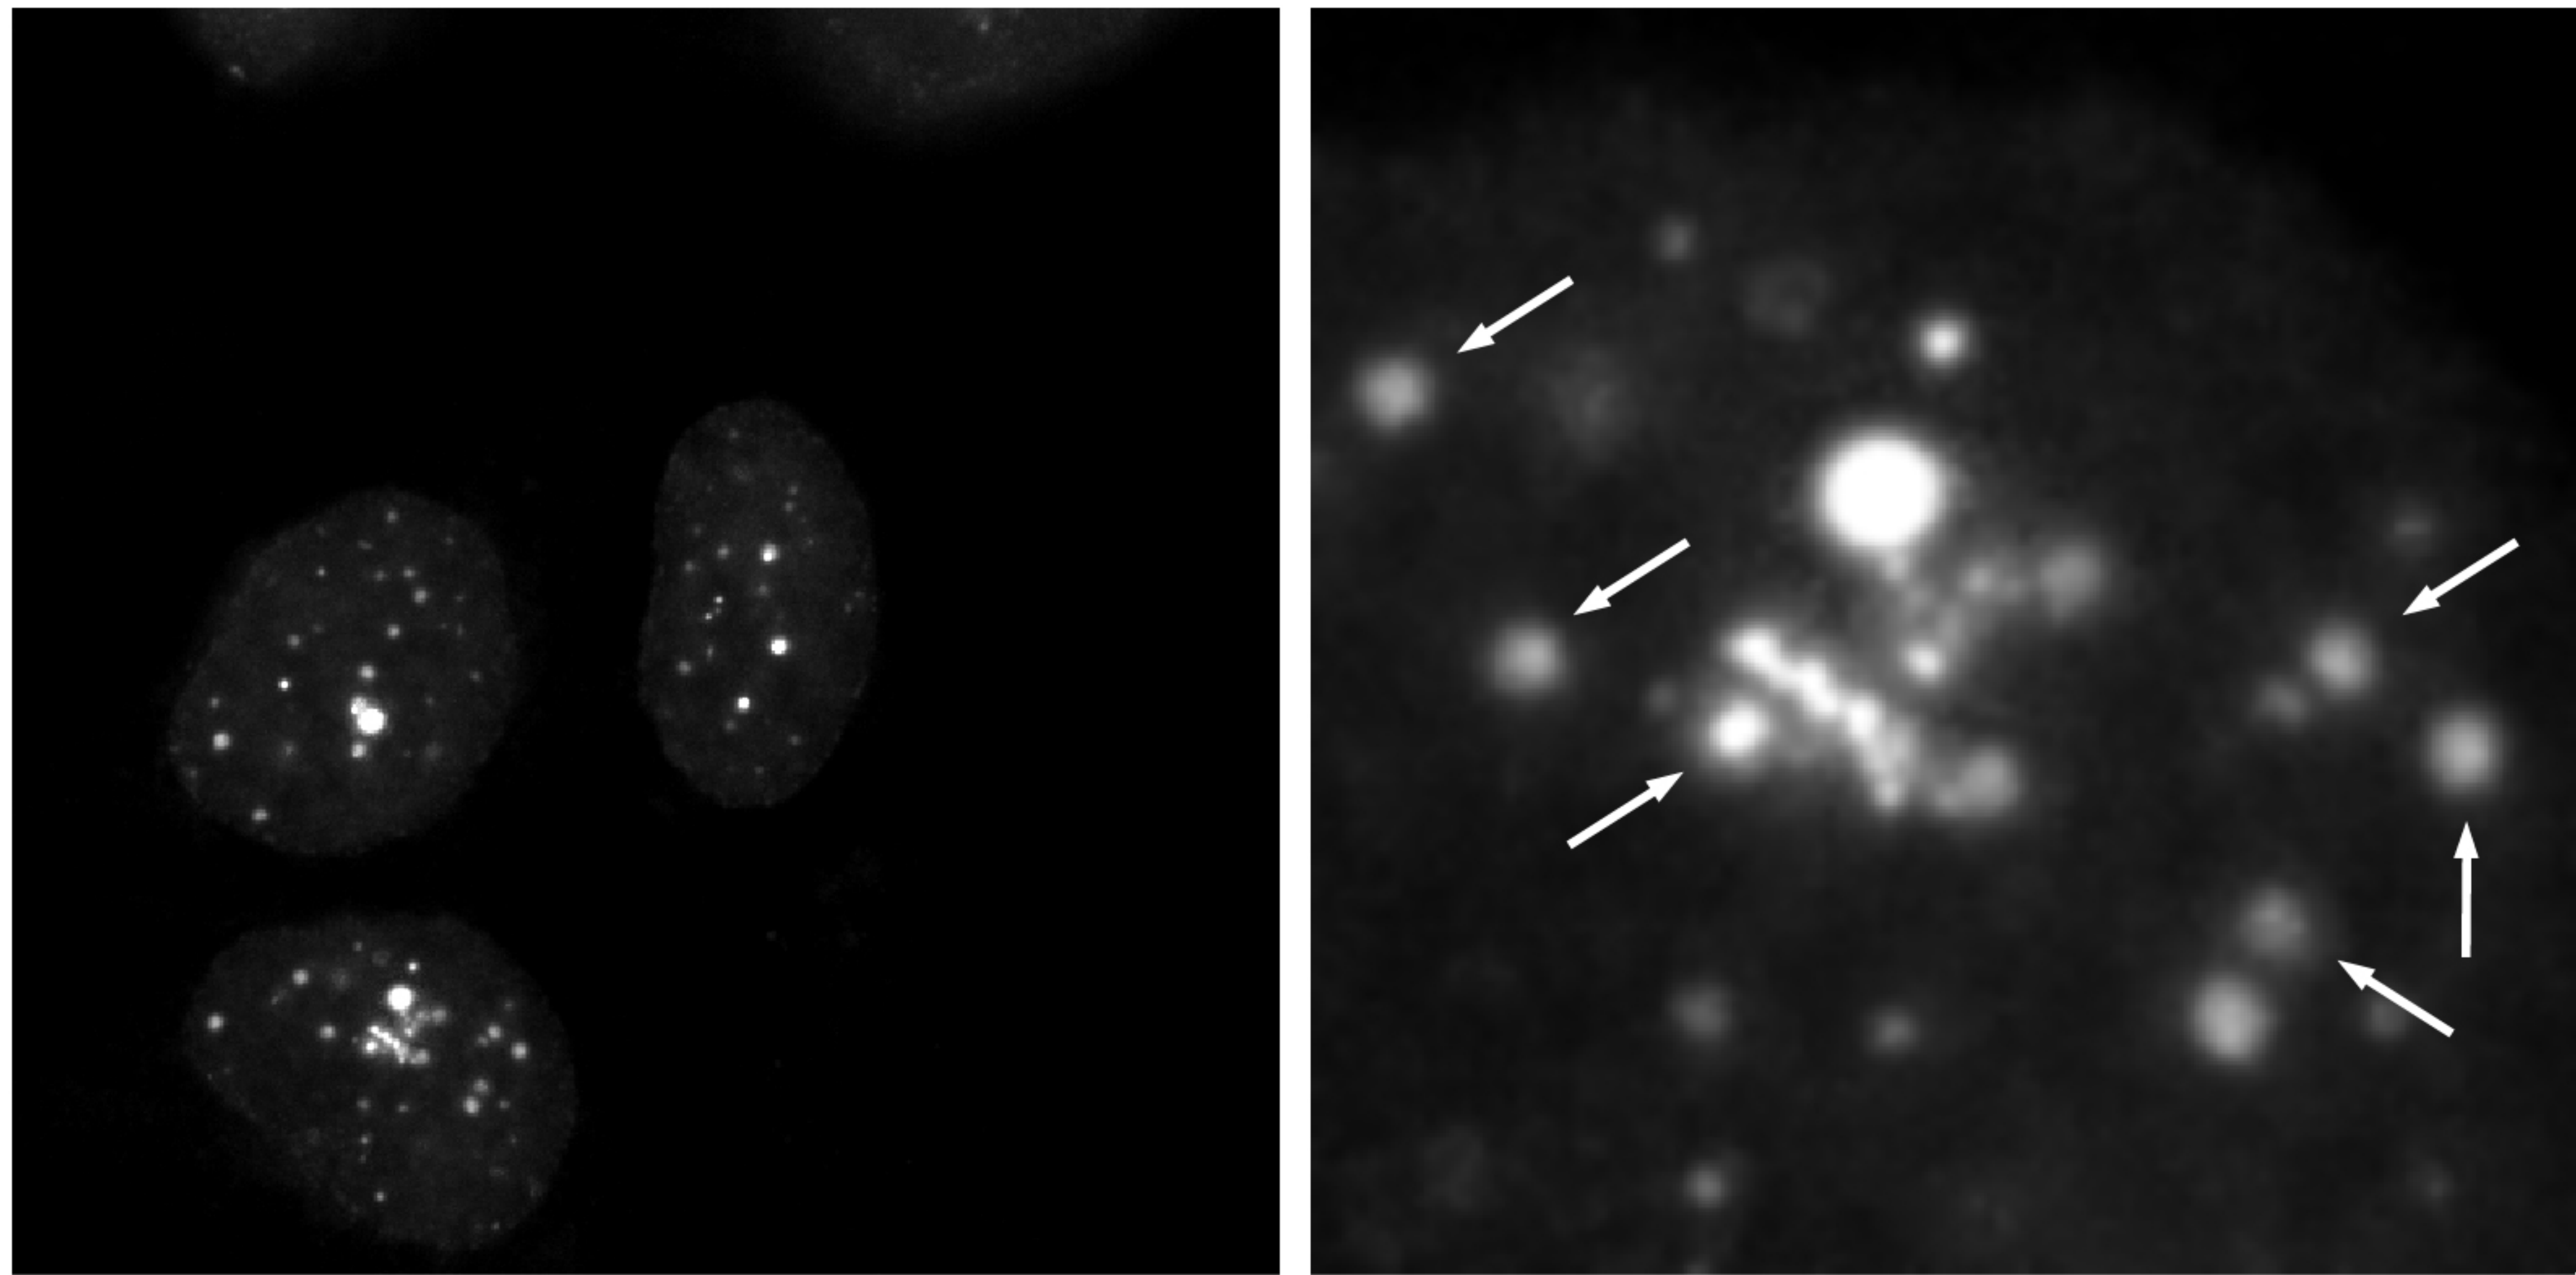

DAPI

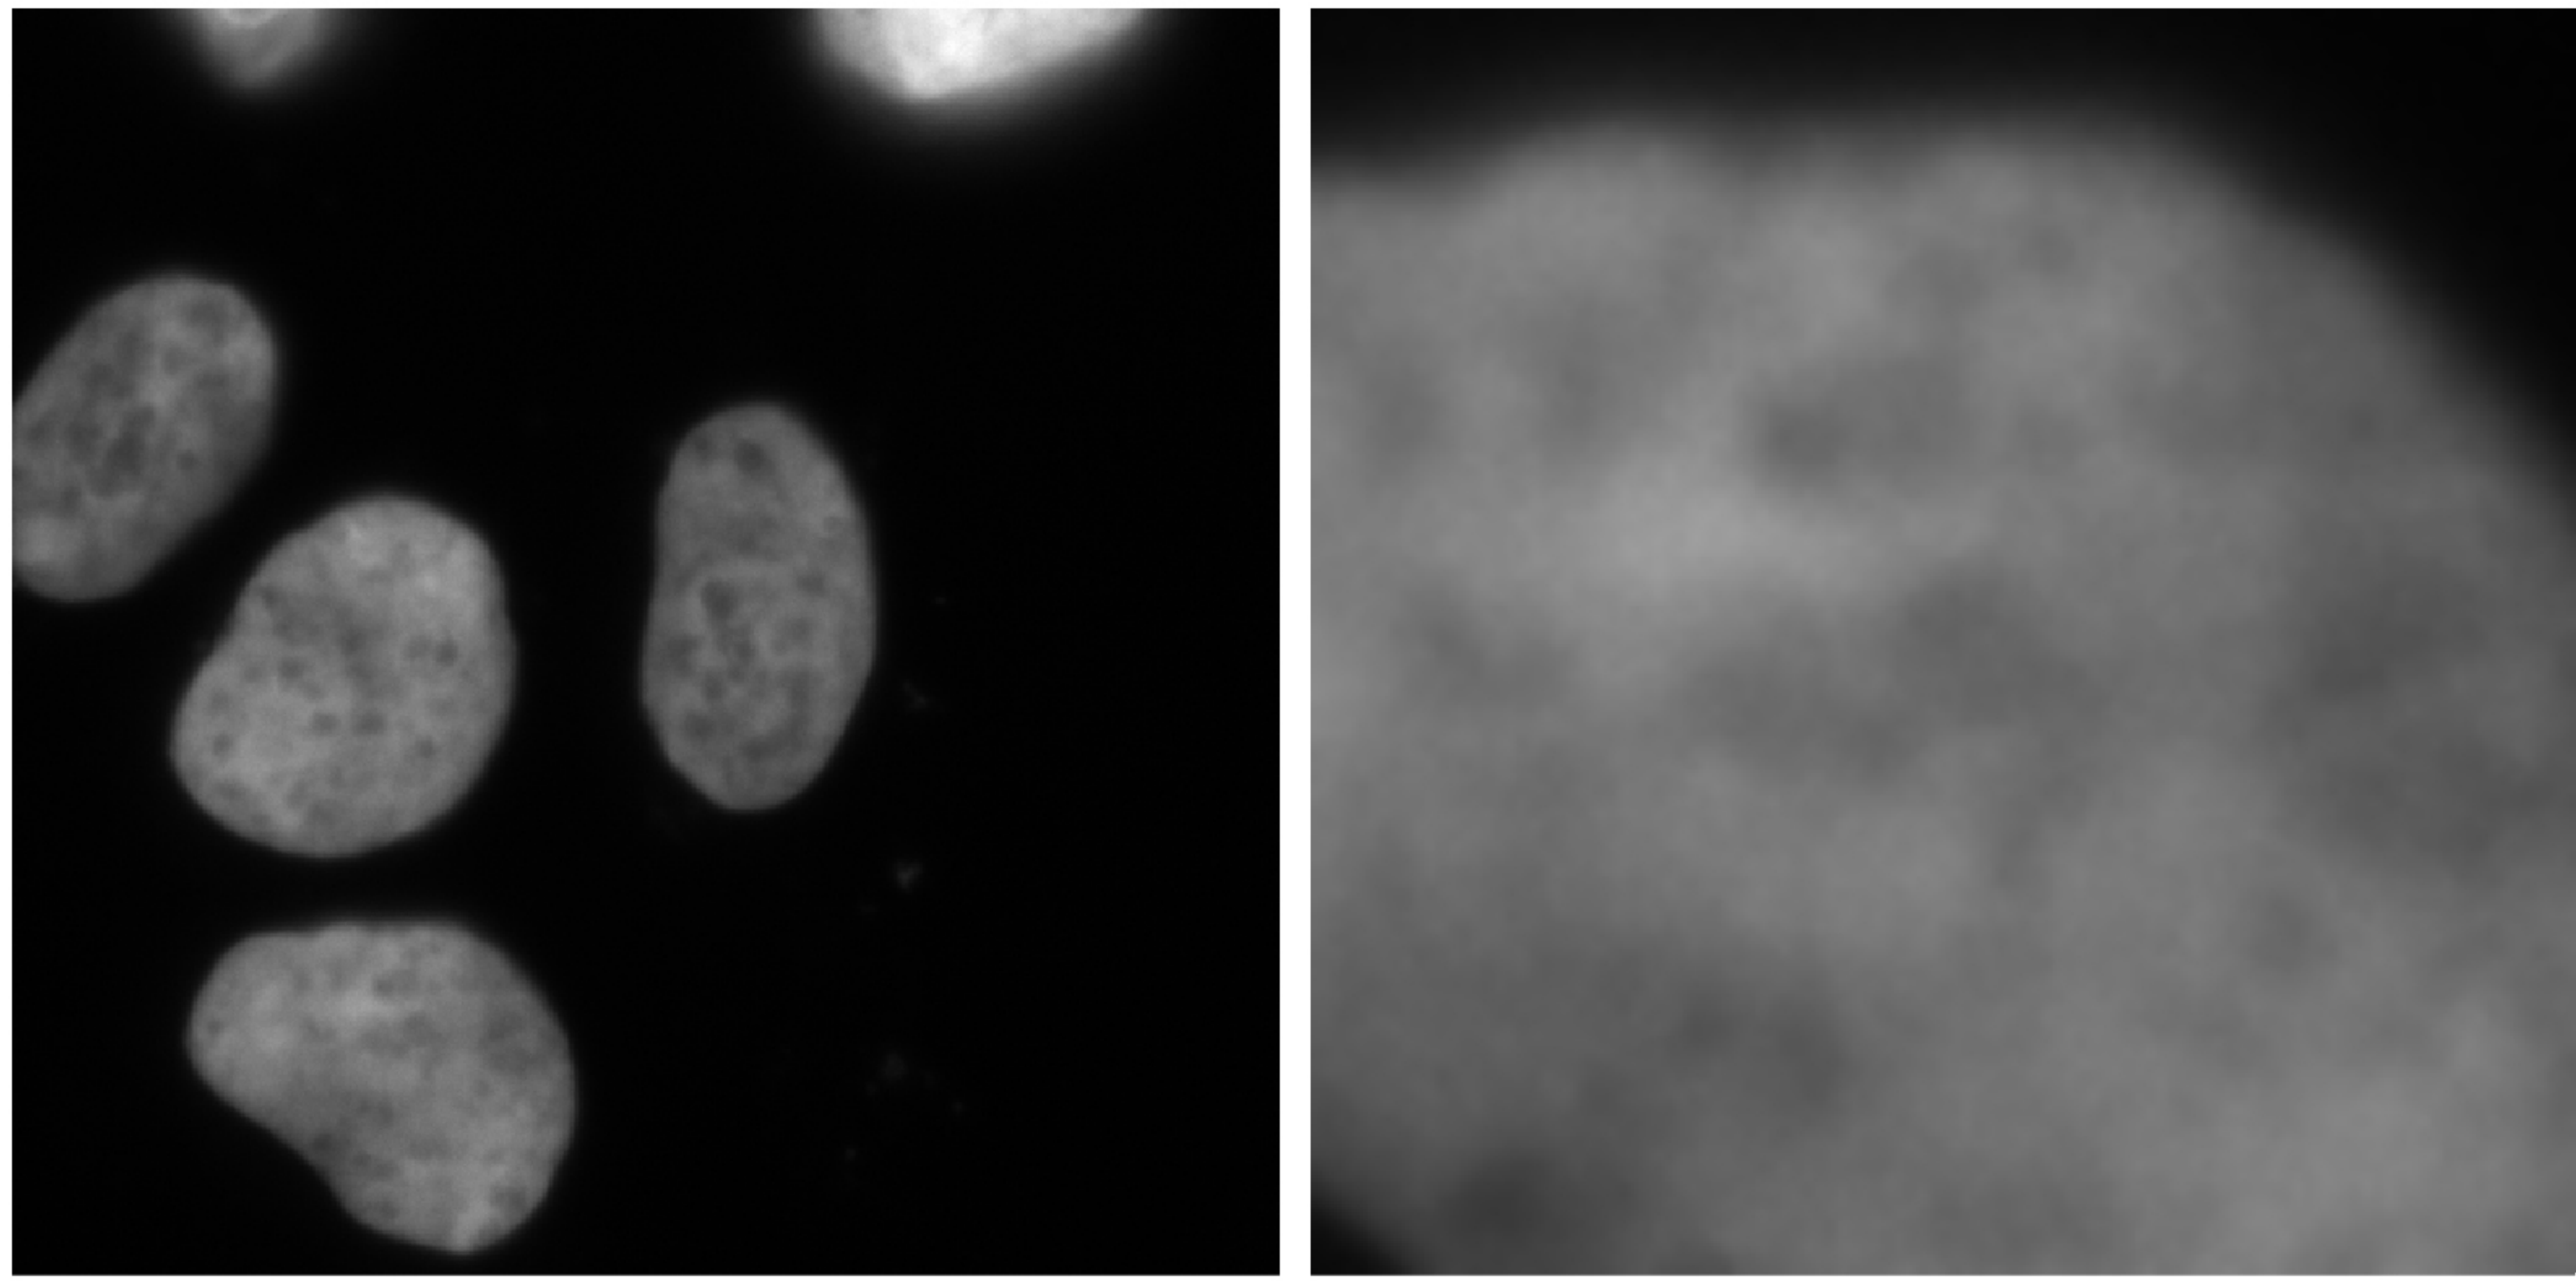

Merge

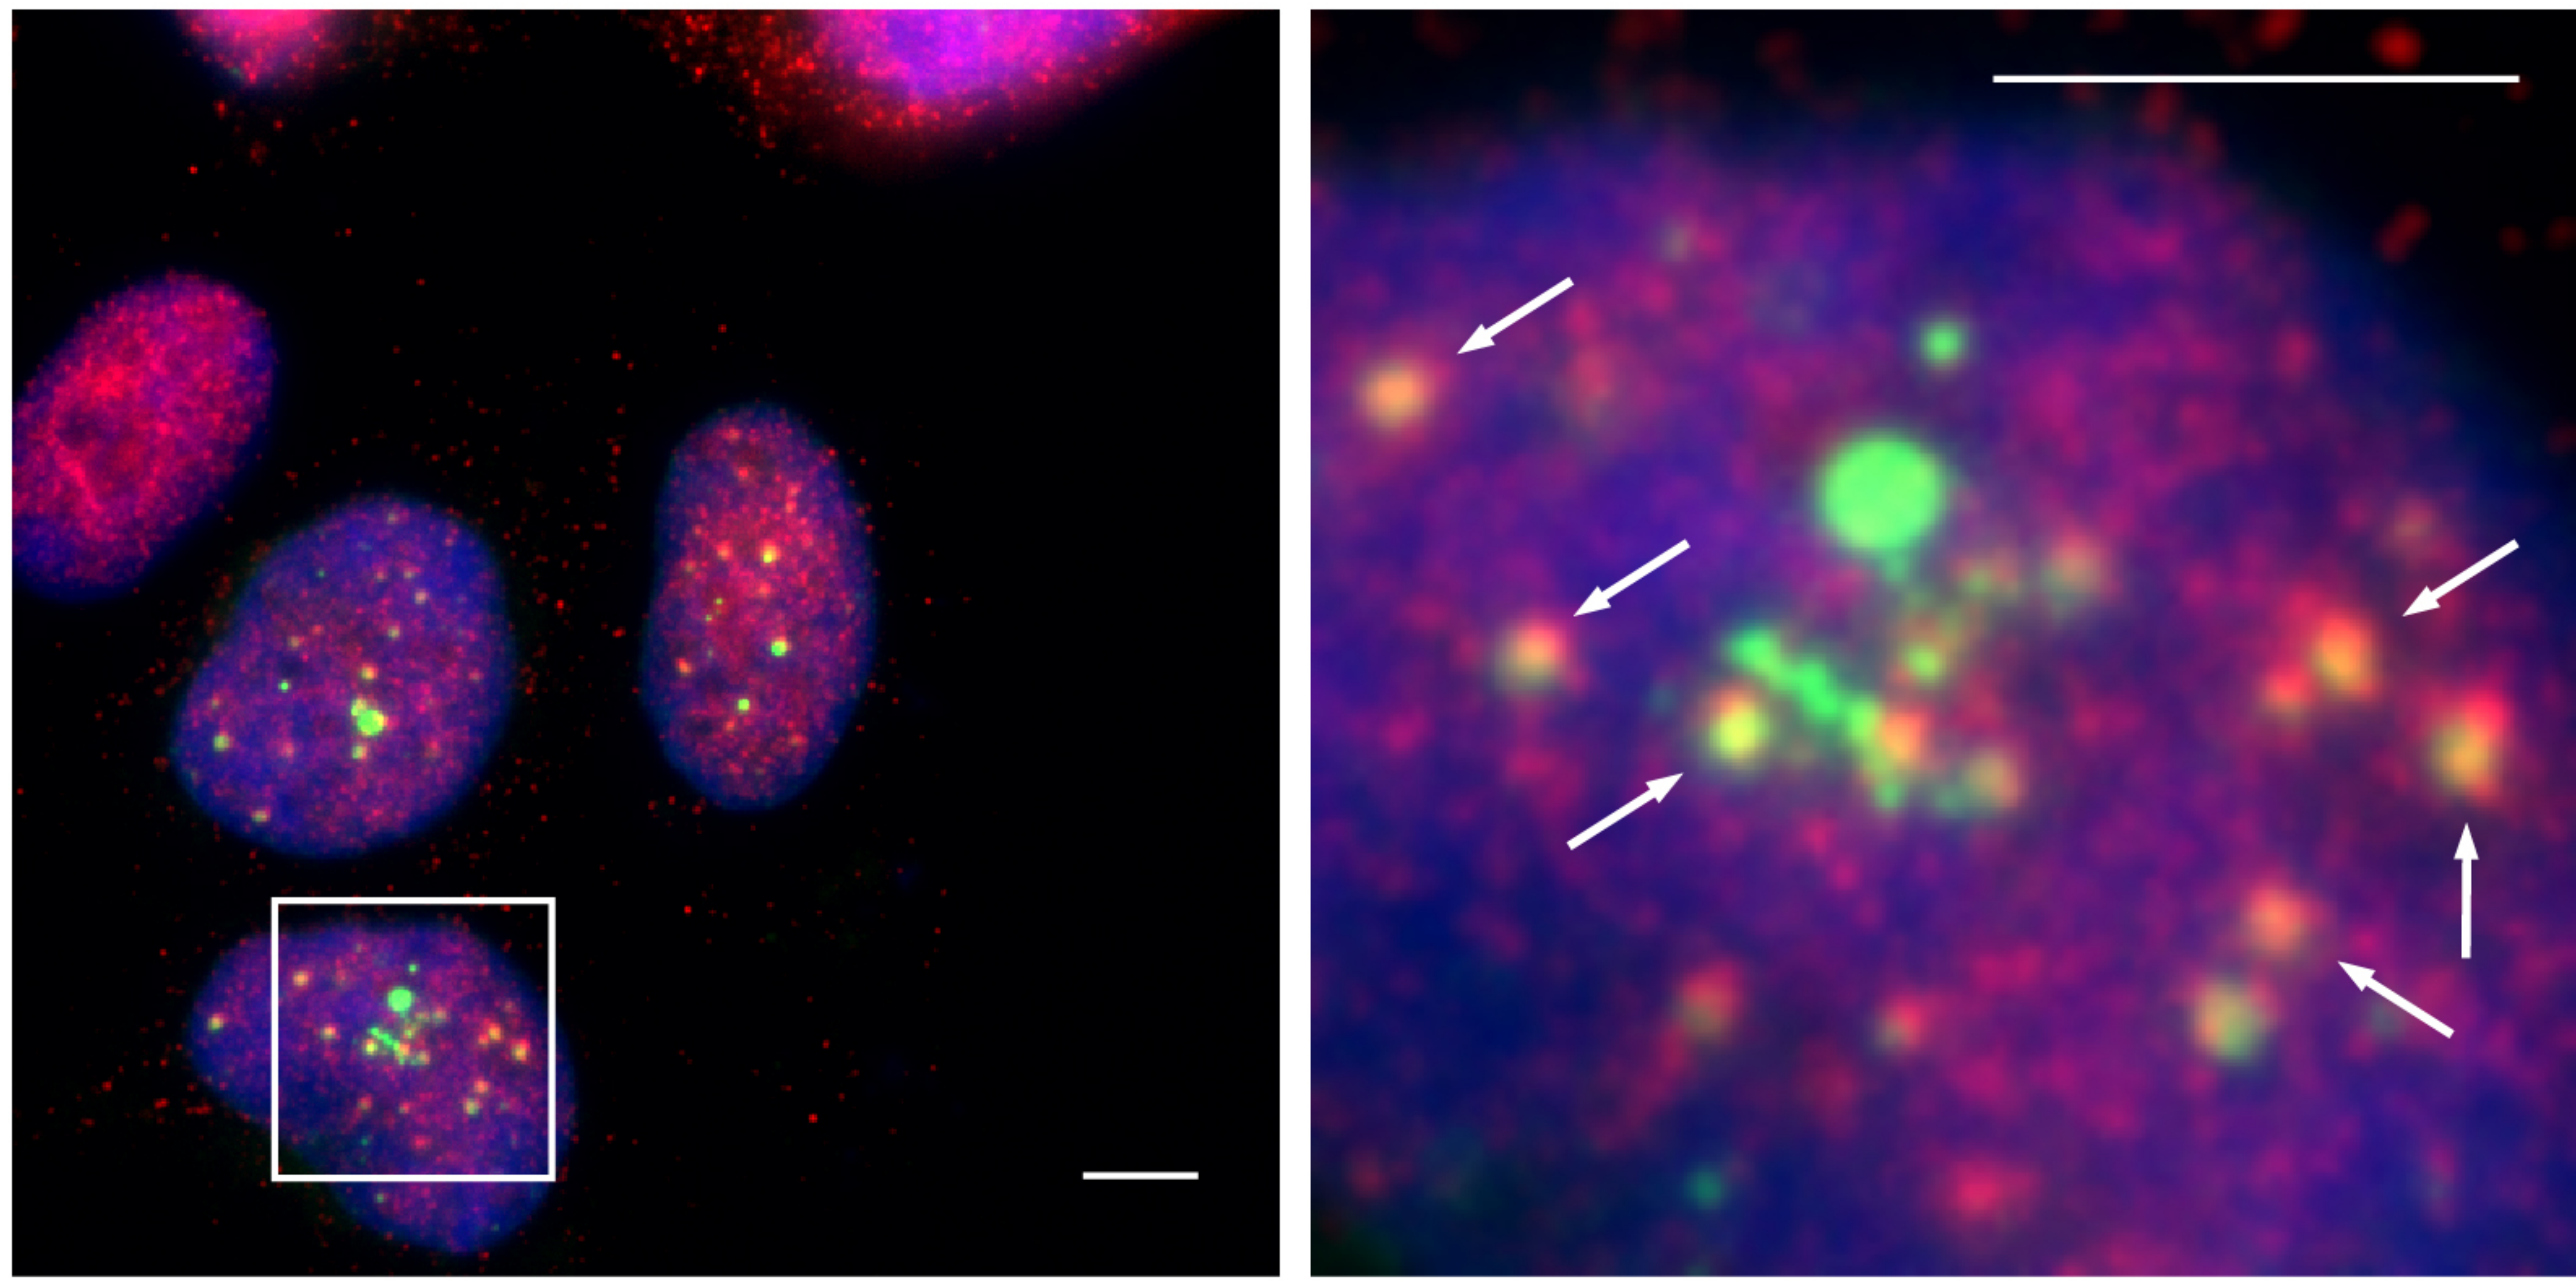

**B**

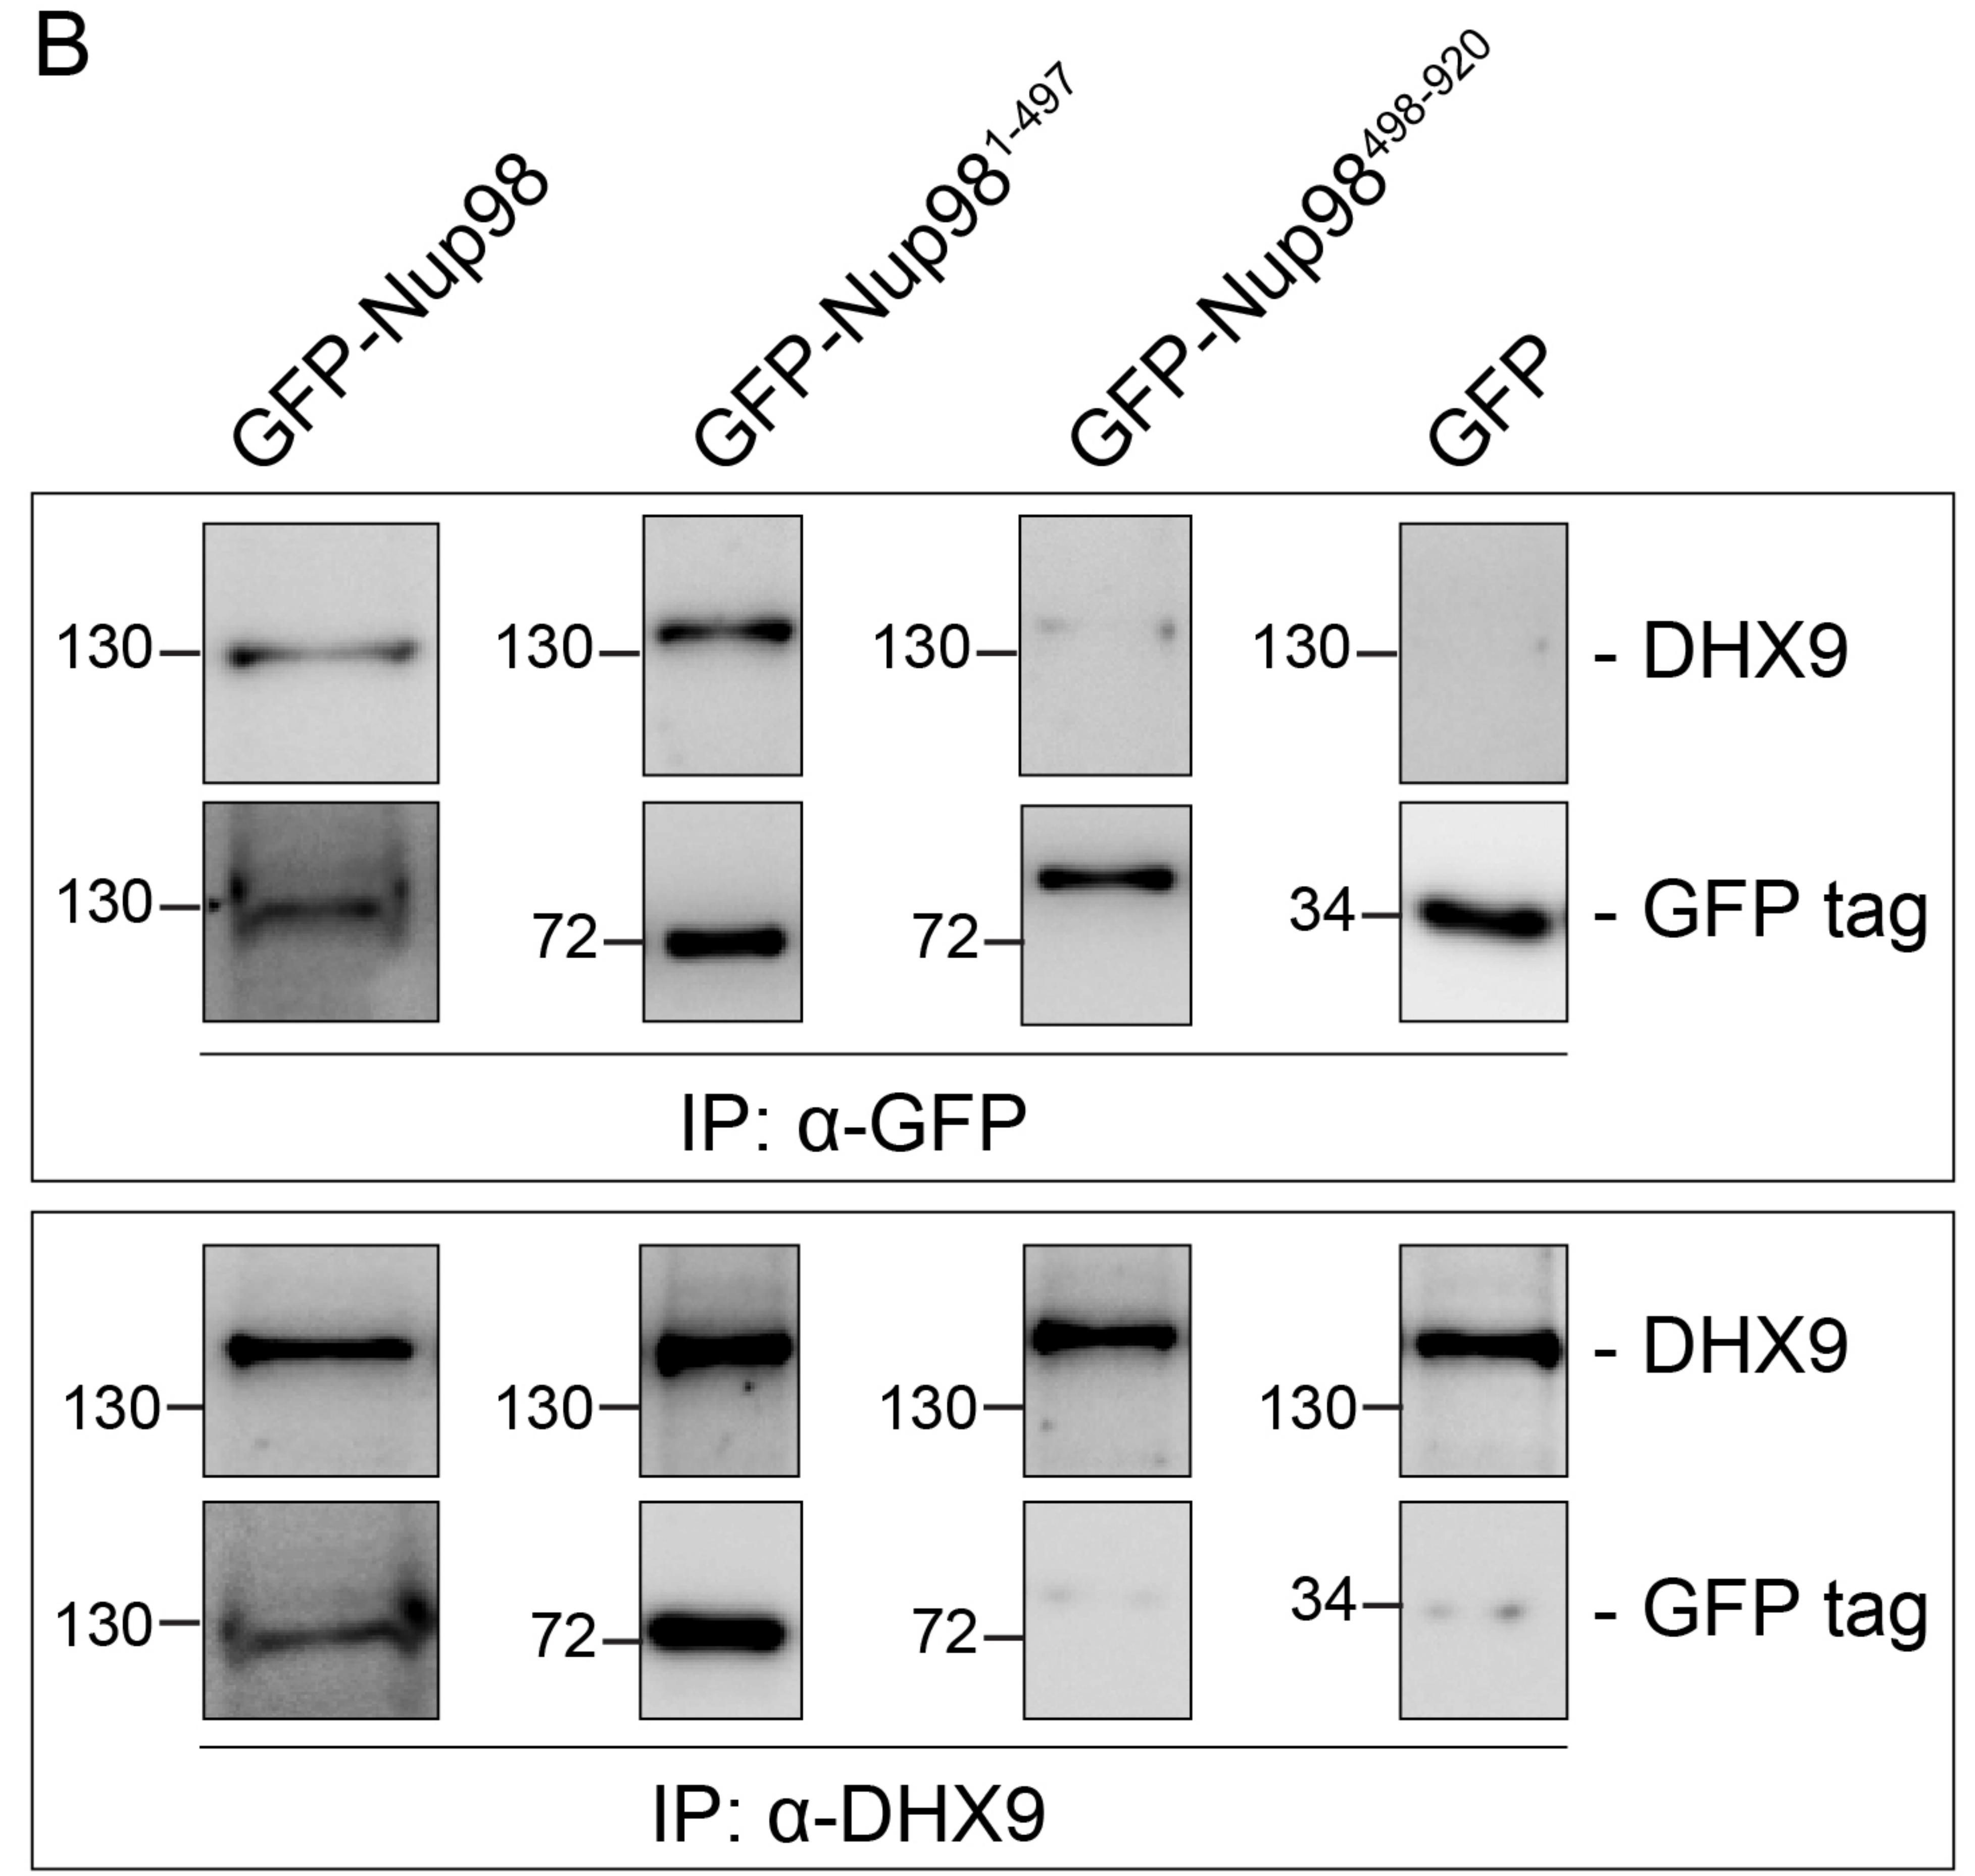

Supplement: supp [file elife-18825-supp-v1.zip]

IP IgG:

Input (10%)

$\alpha$ -DHX9

$\alpha$ -hnRNP U

$\alpha$ -Nup98

Control

130

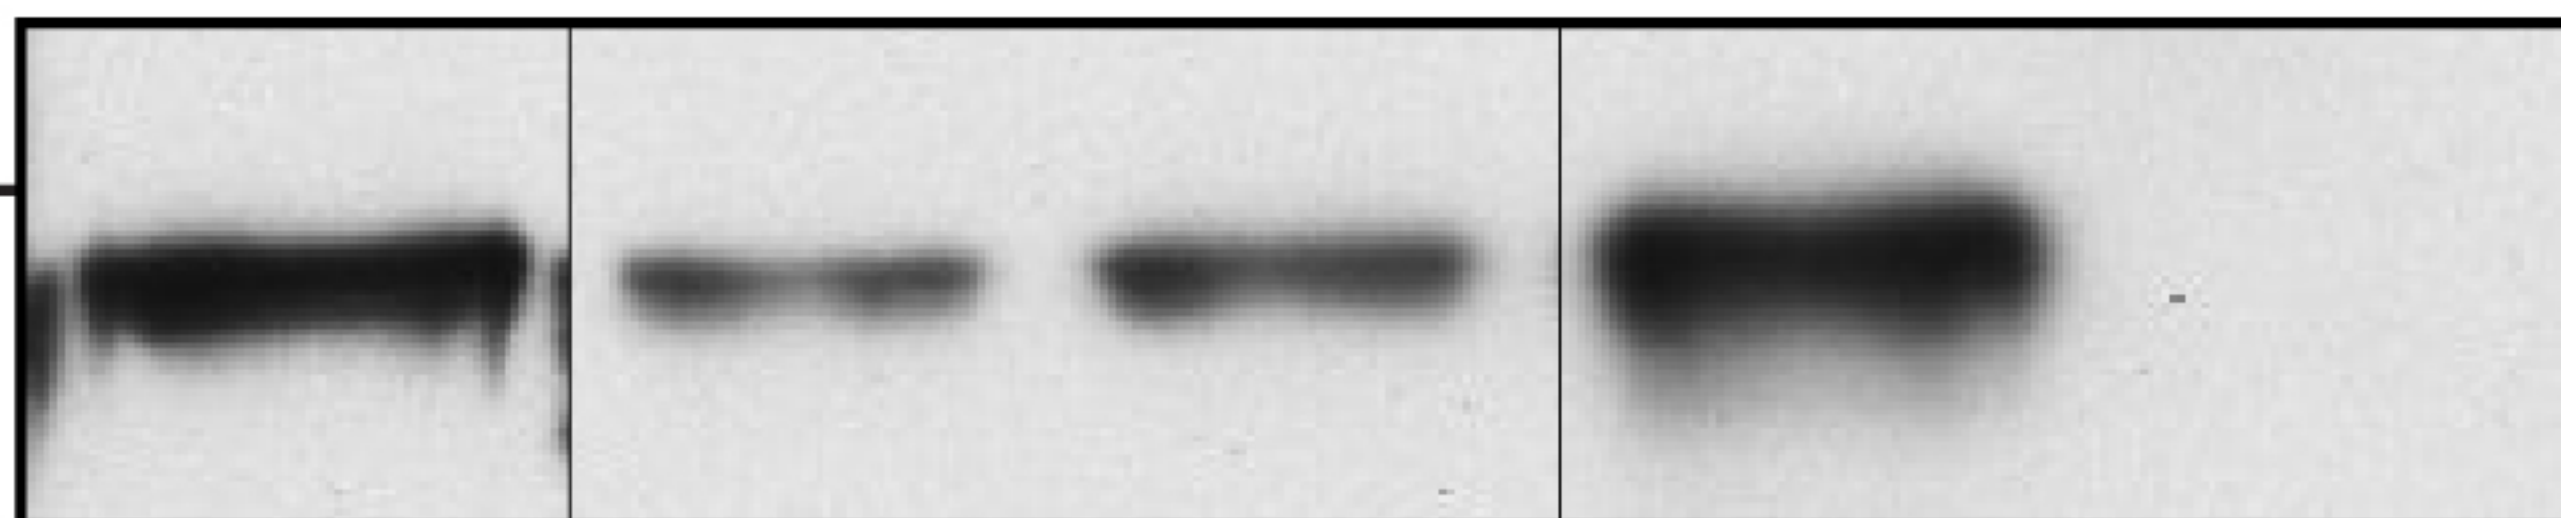

- hnRNP U

130

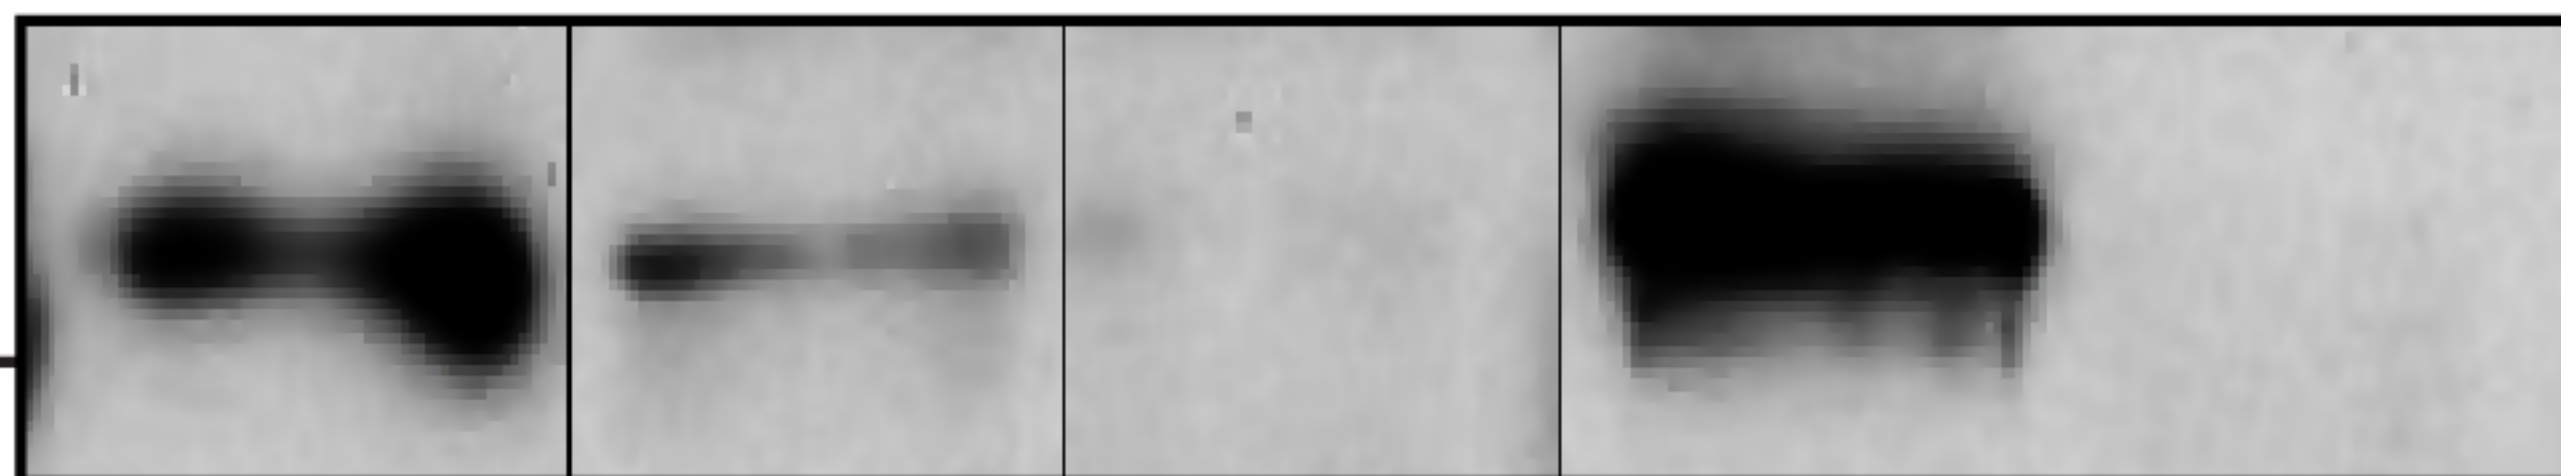

- DHX9

95

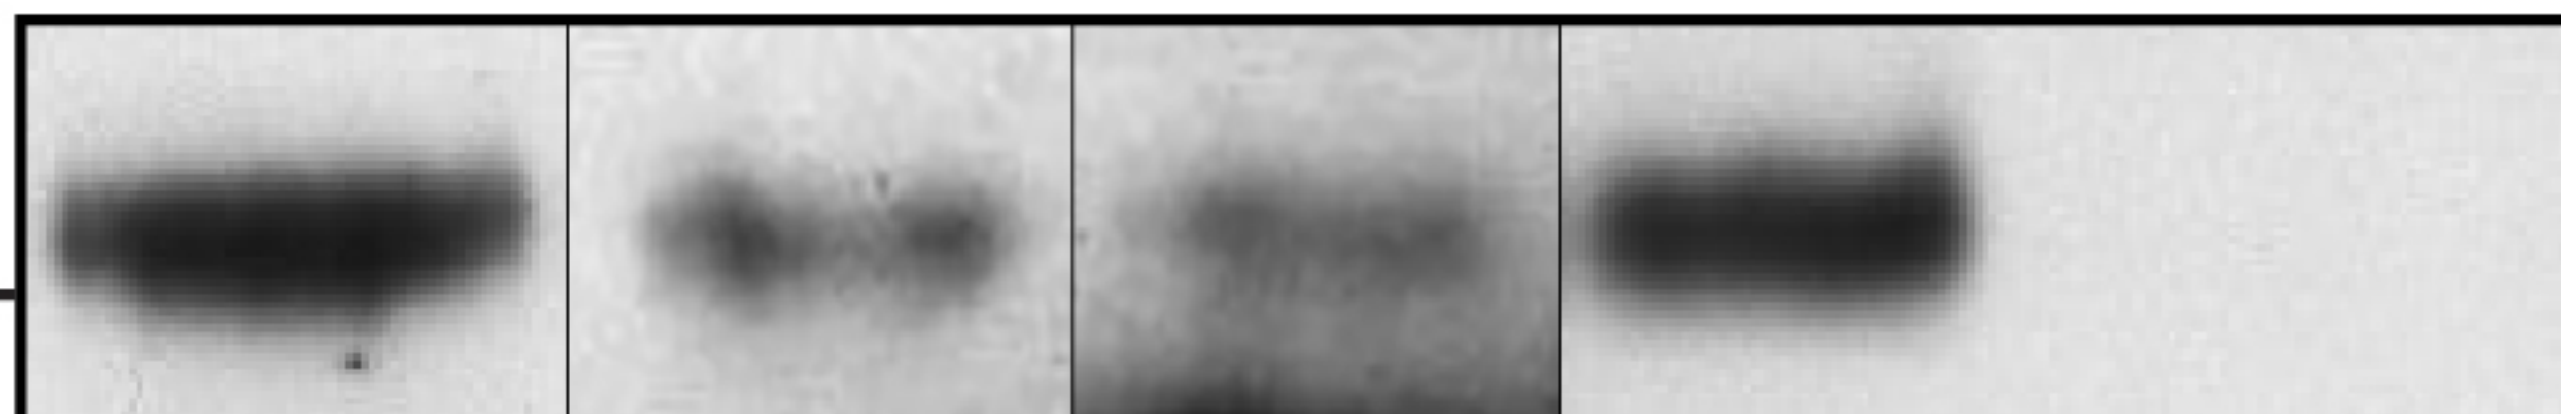

- Nup98

Supplement: supp [file elife-18825-supp-v1.zip]

DHX9<sup>WT</sup>

DHX9<sup>I347A</sup>

DHX9<sup>K417R</sup>

130

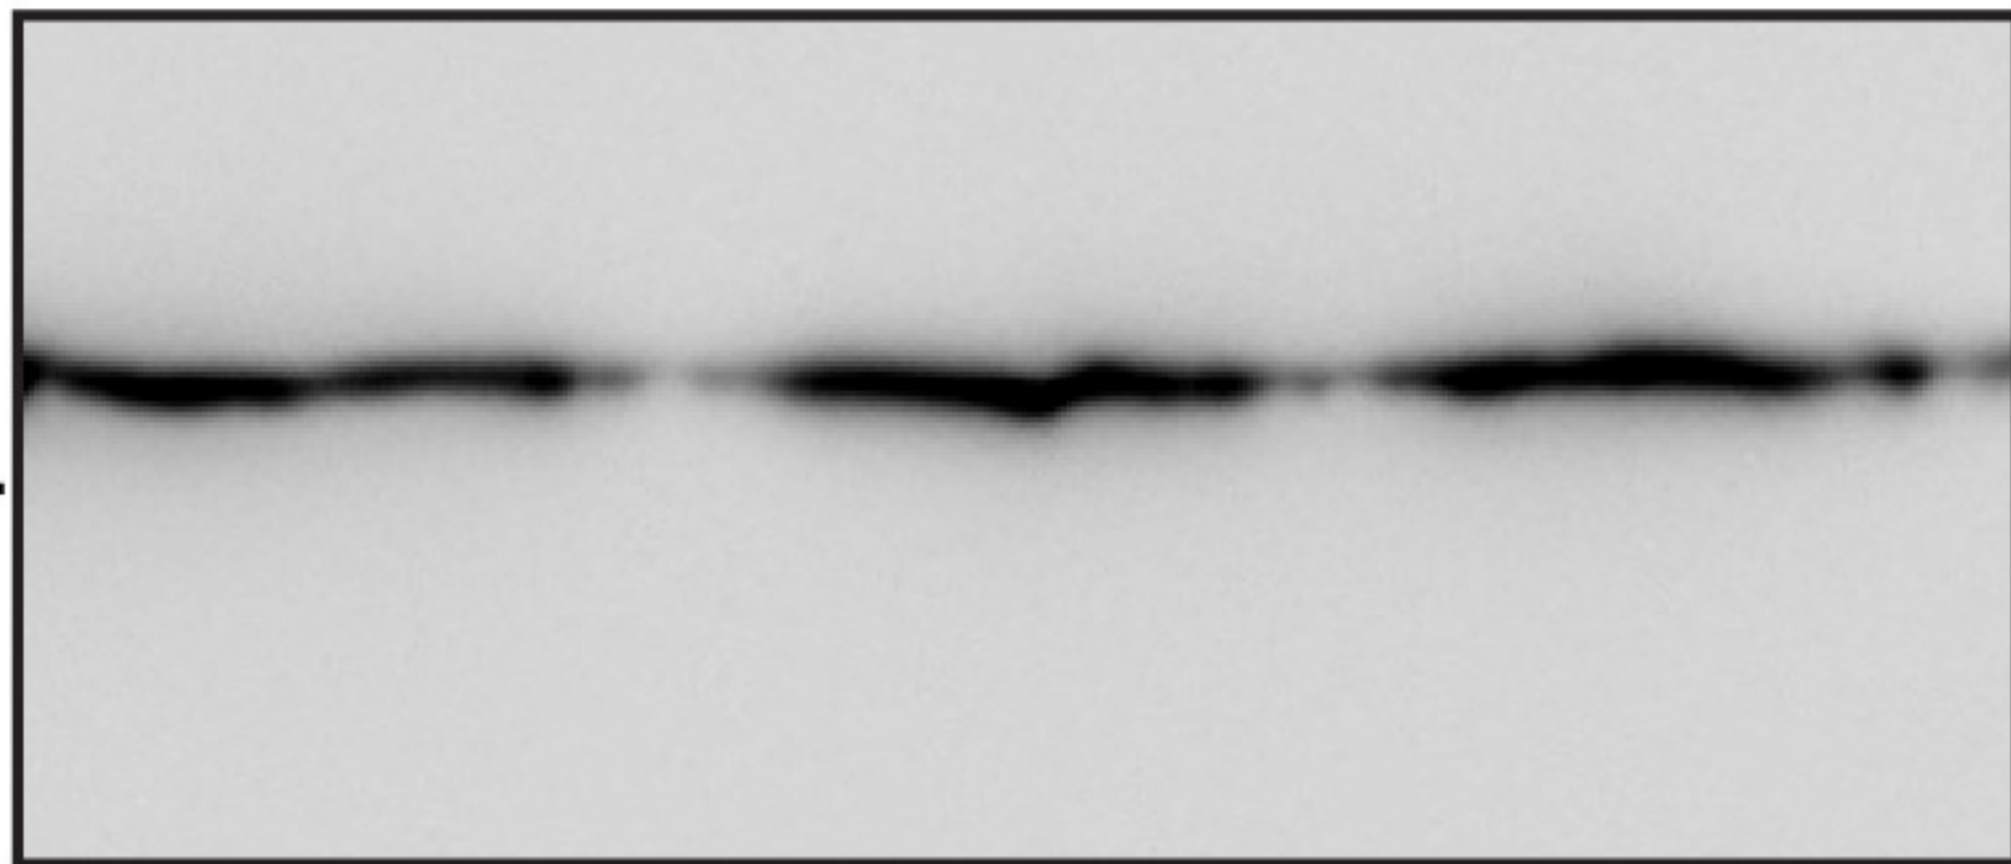

- HA tag

55

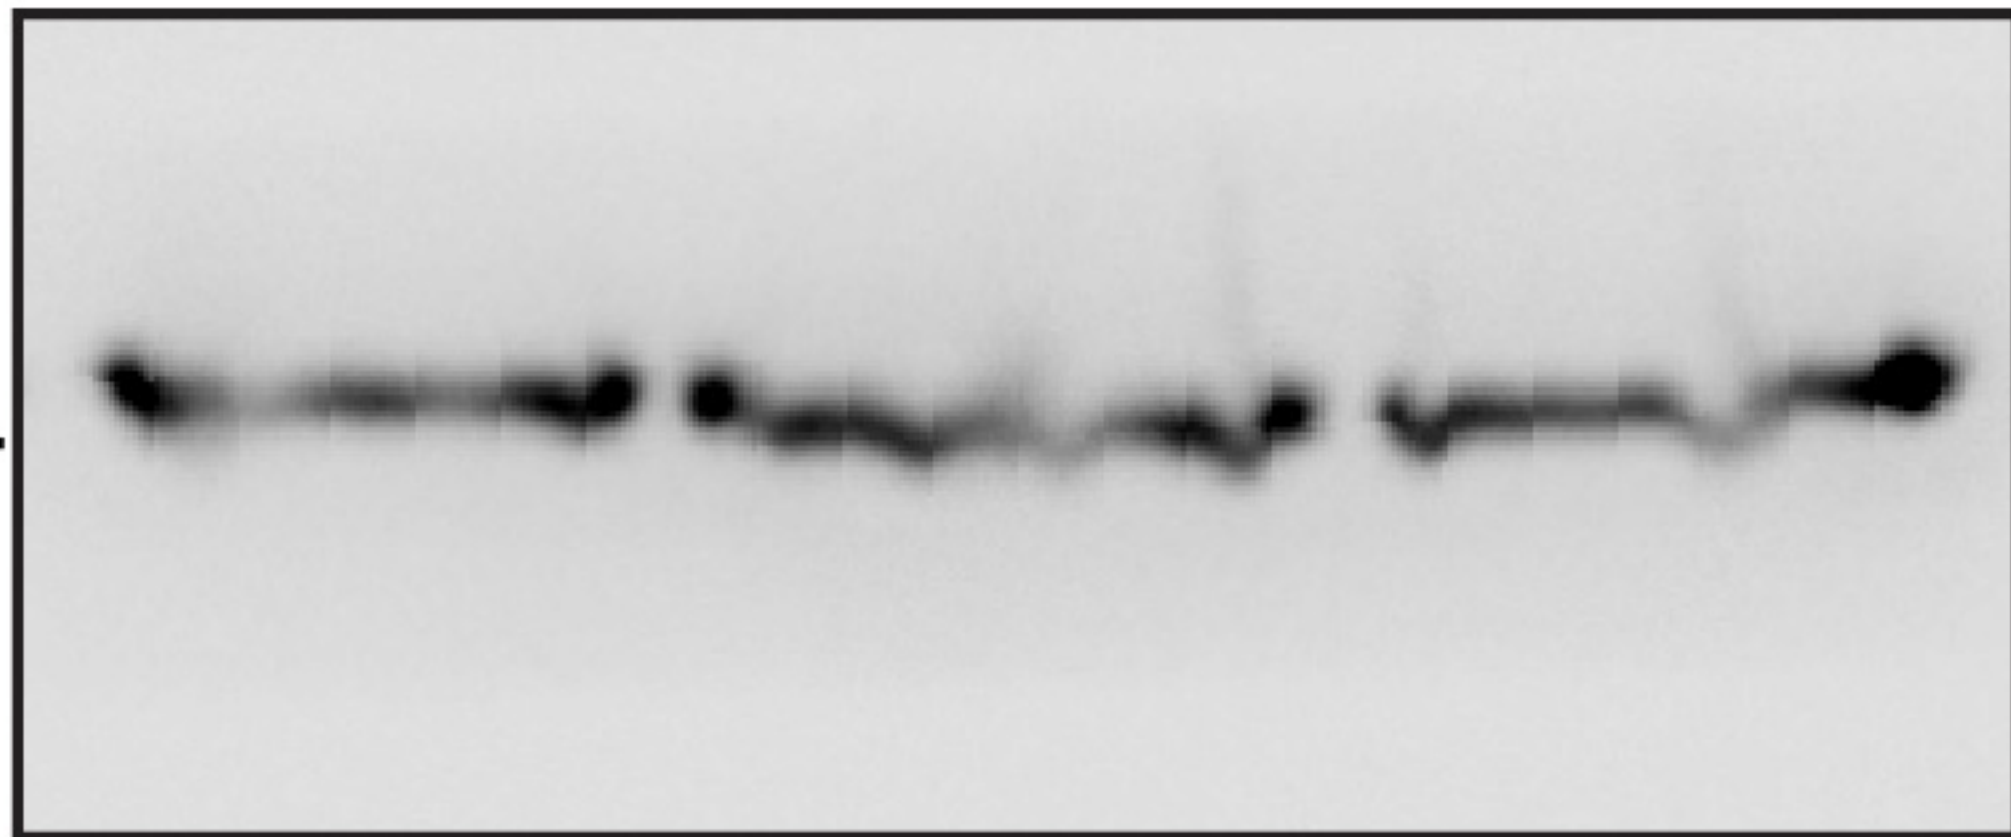

-  $\alpha$ -tubulin

Supplement: supp [file elife-18825-supp-v1.zip]

shRNA

control

Nup98

DHX9

170

130

- DHX9

95

- Nup98

55

-  $\alpha$ -tubulin

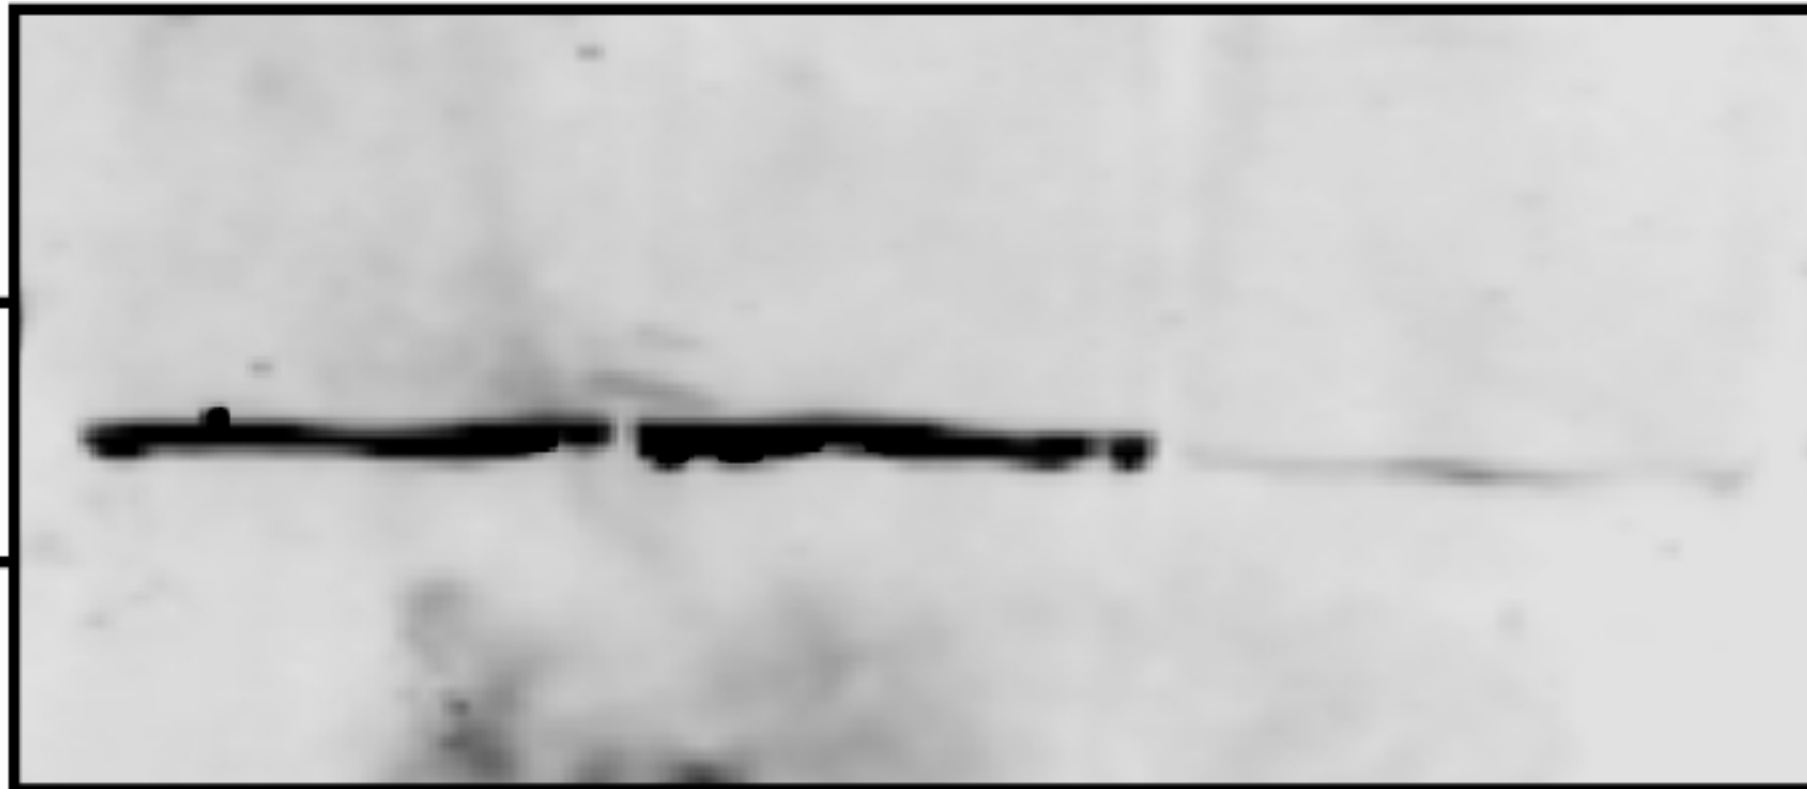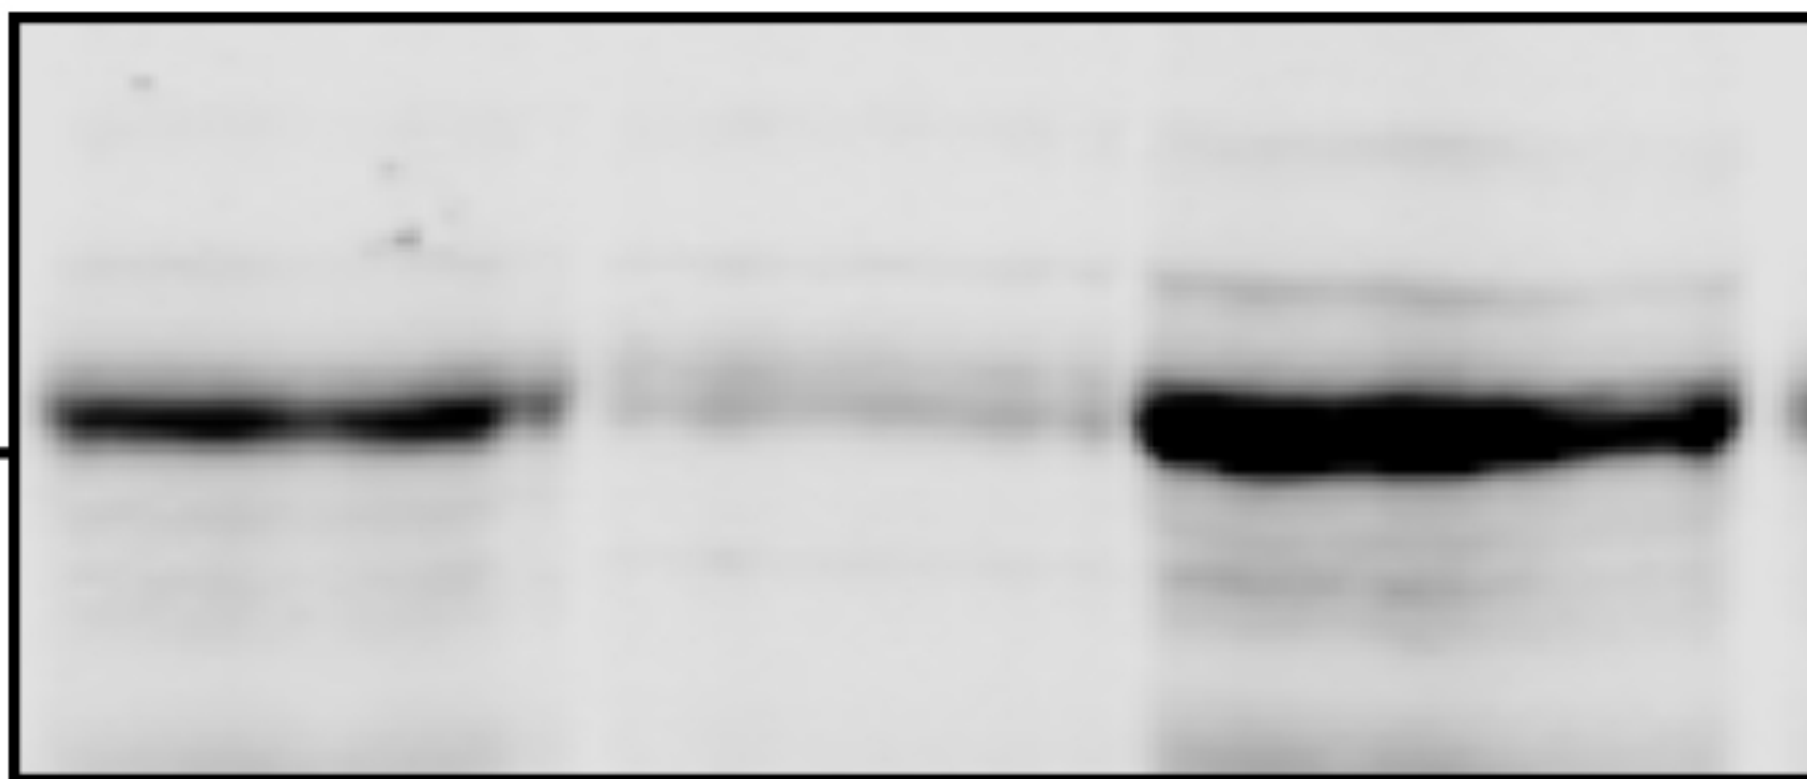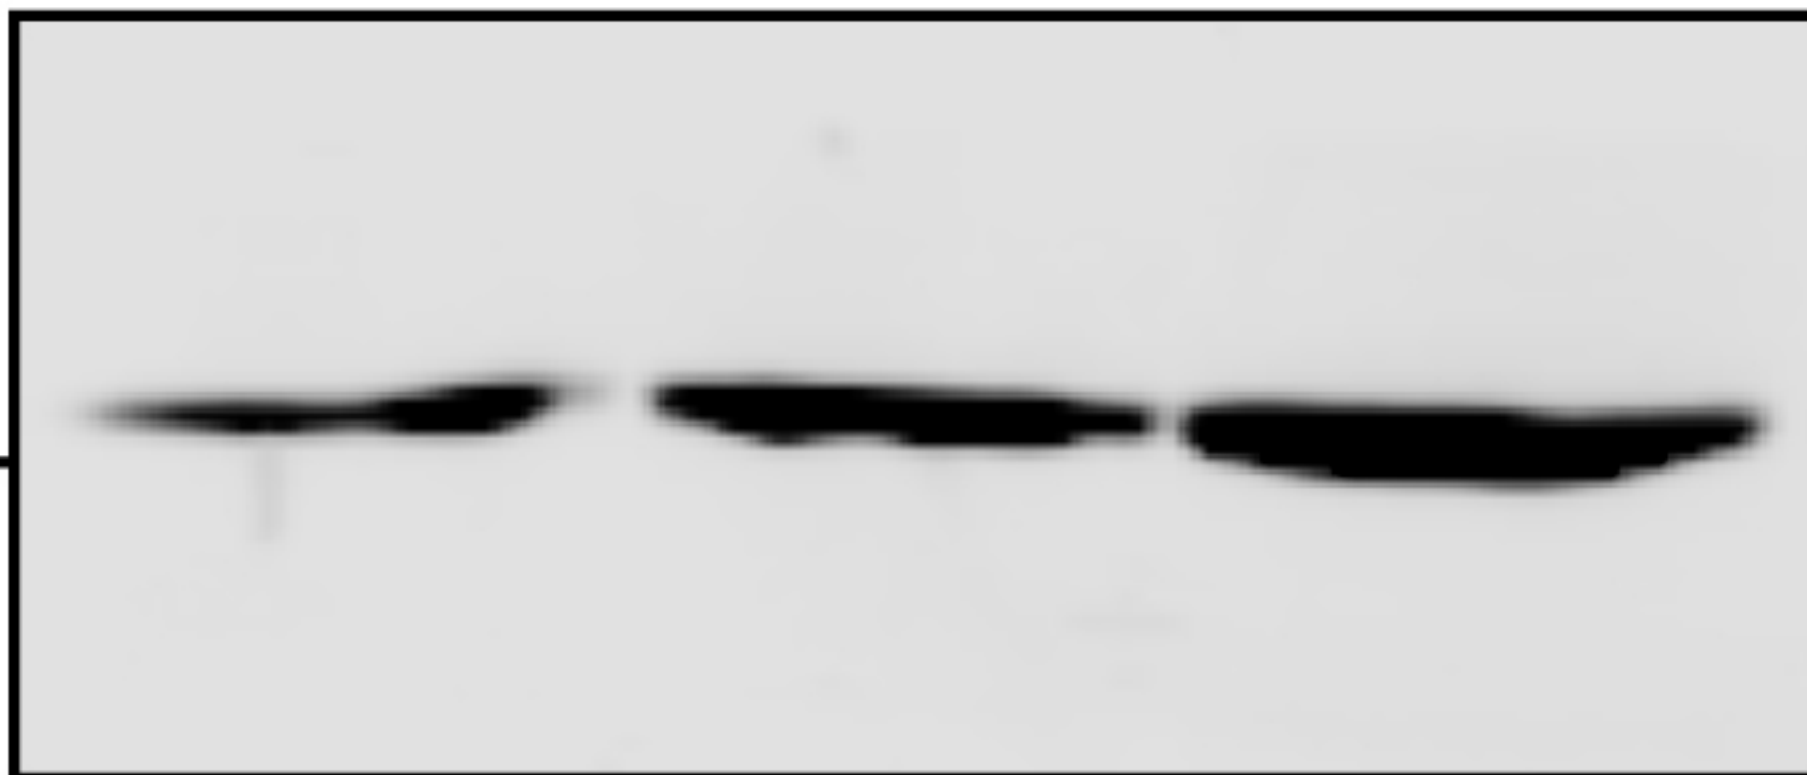

Supplement: supp [file elife-18825-supp-v1.zip]

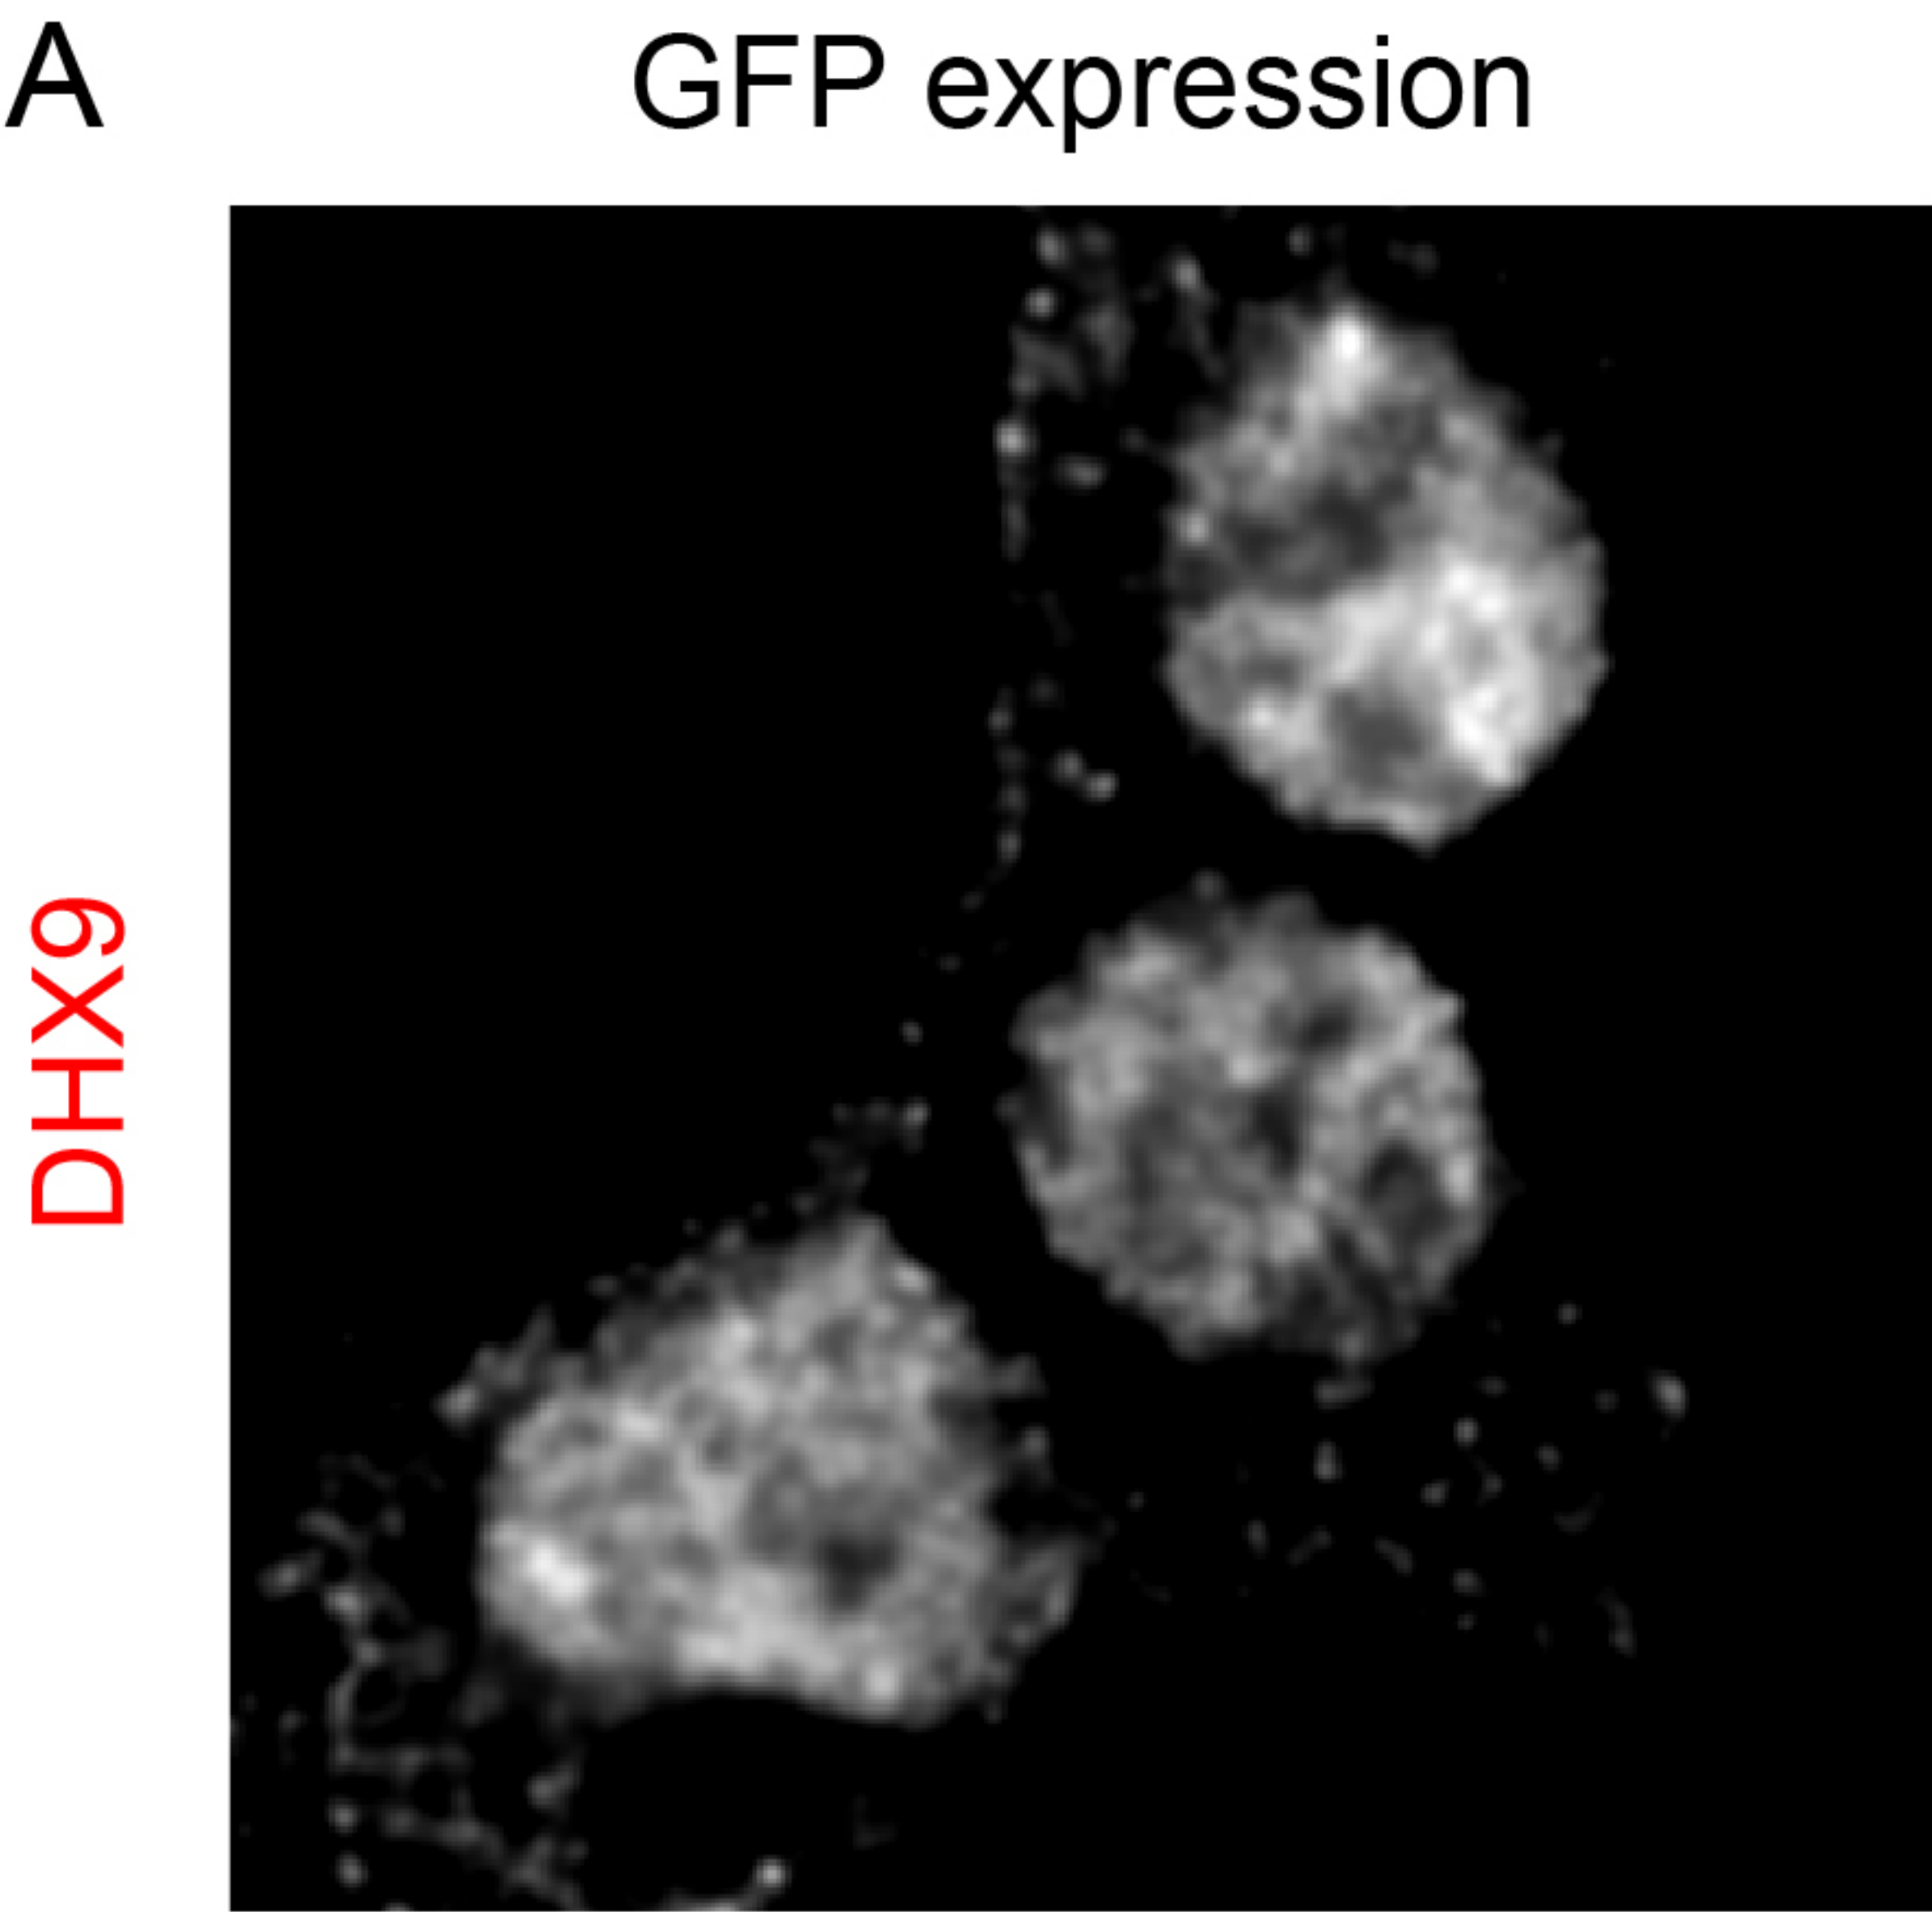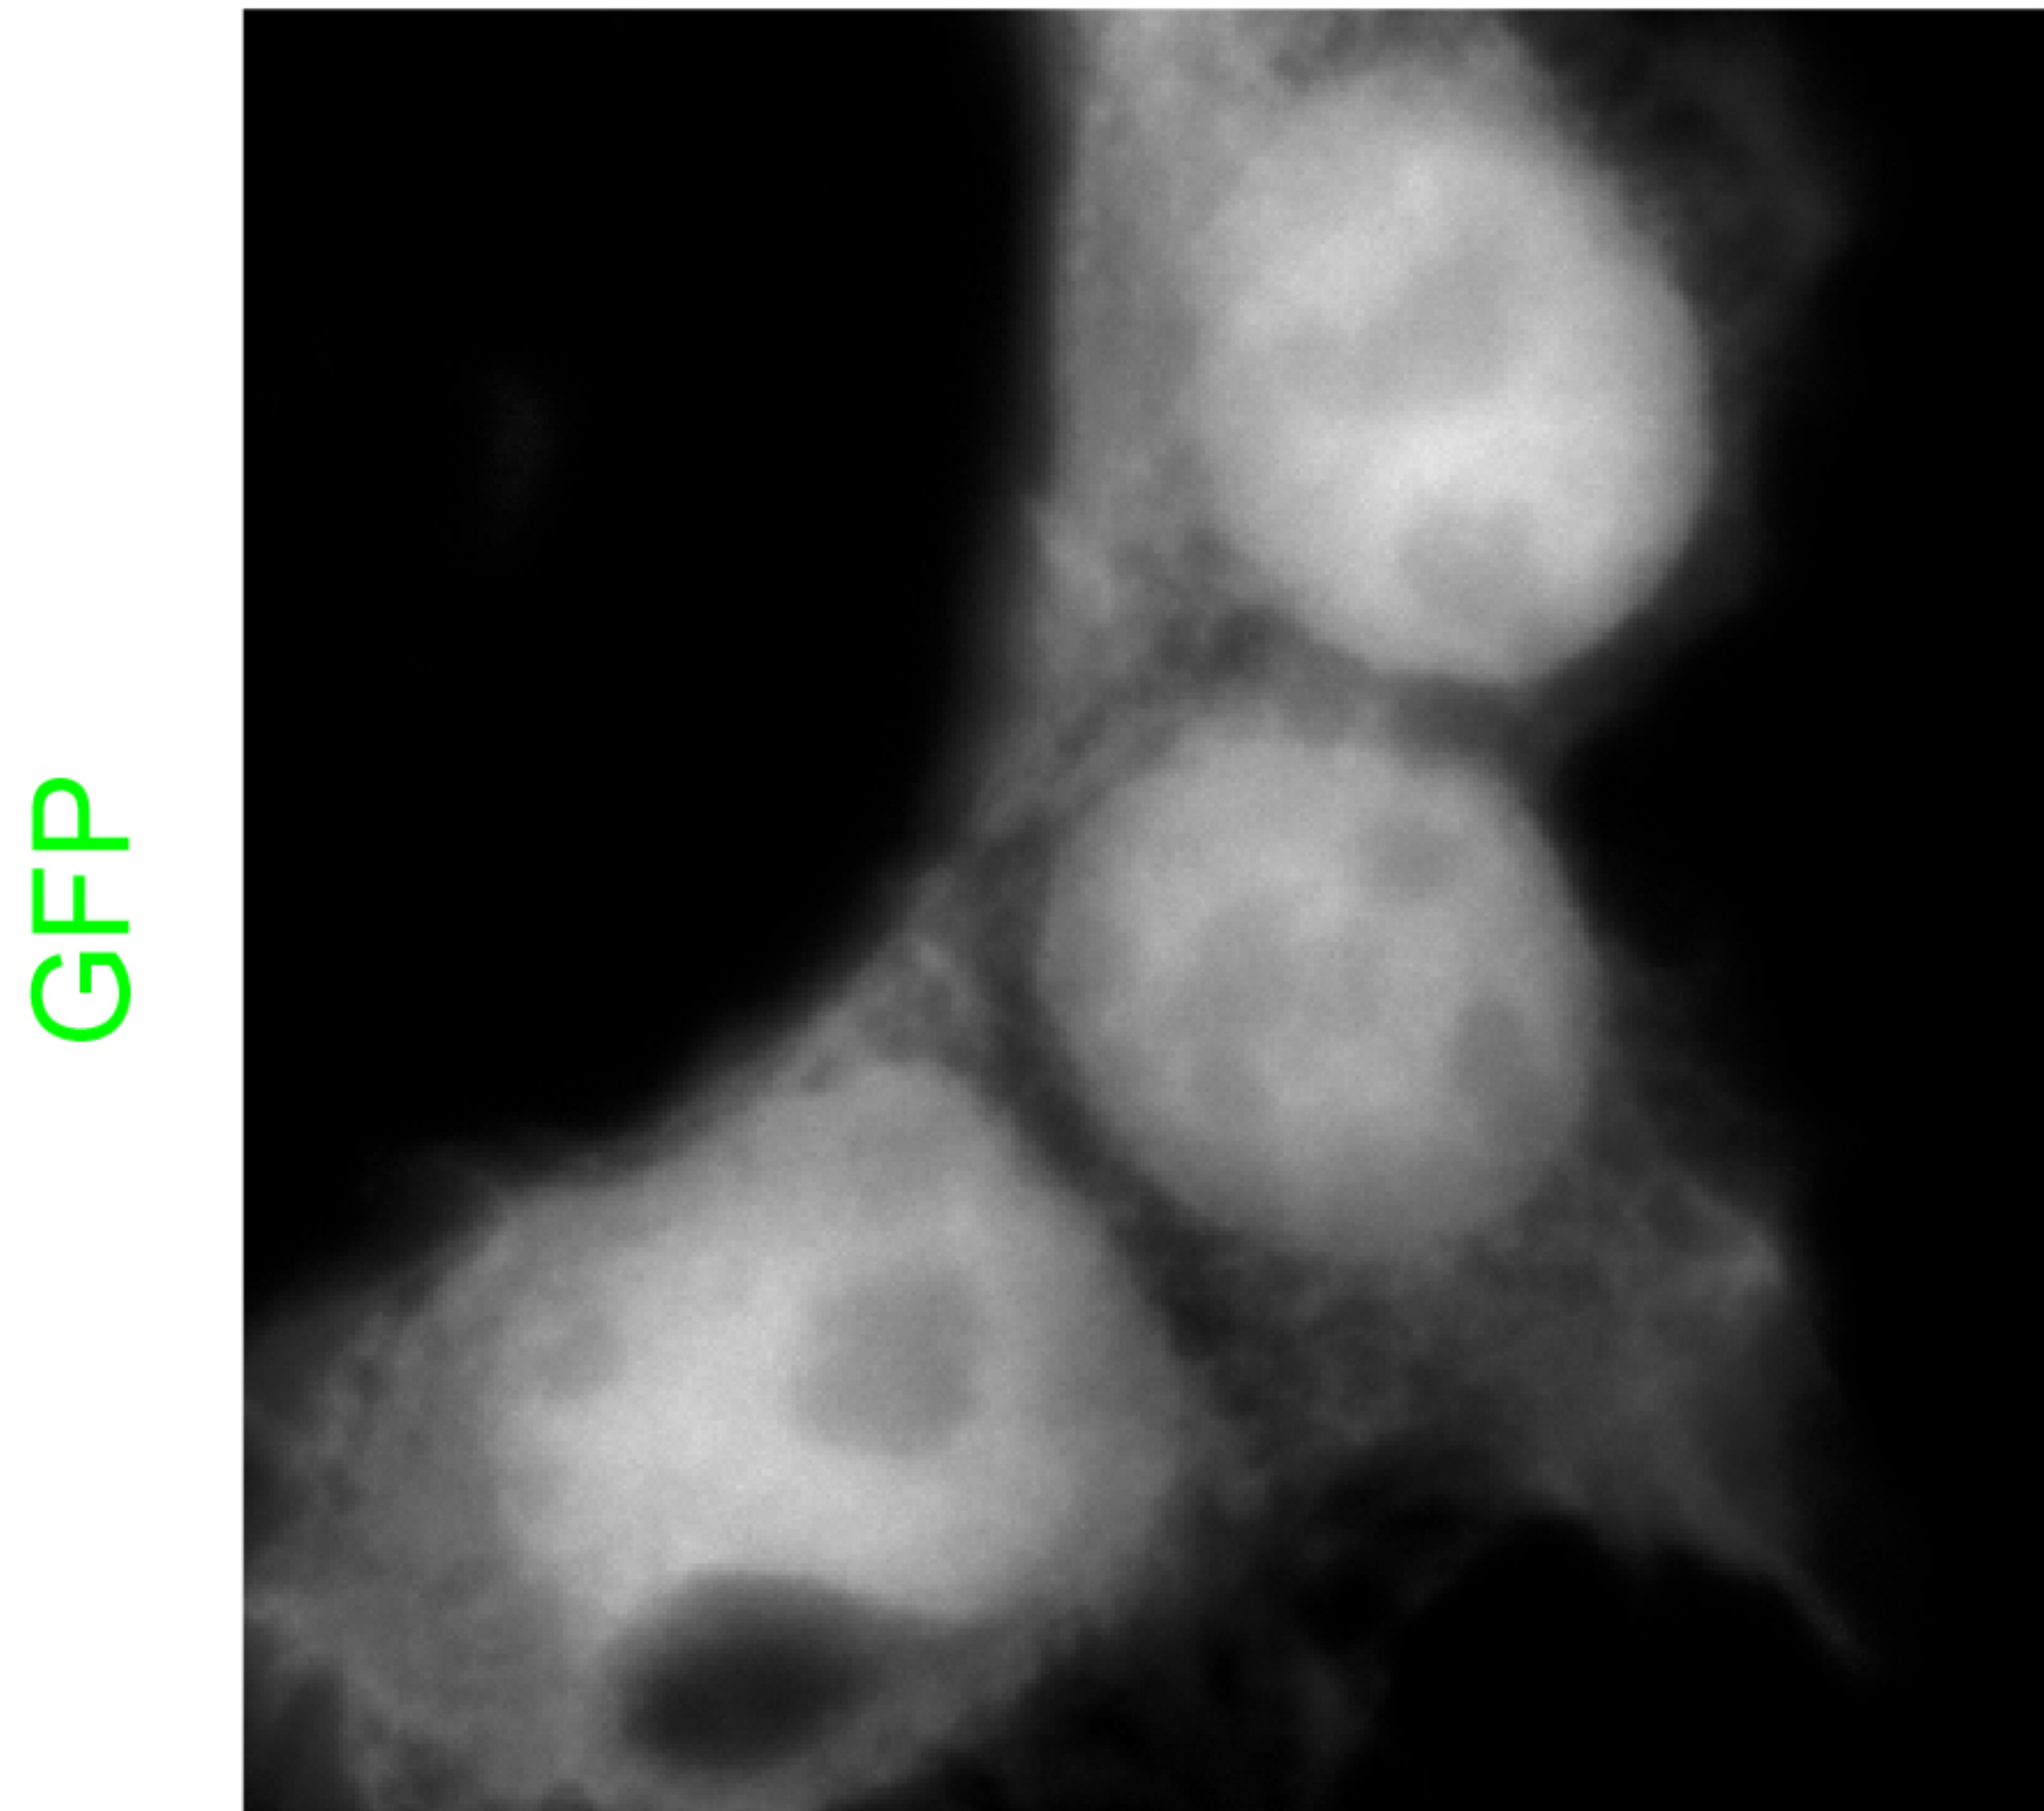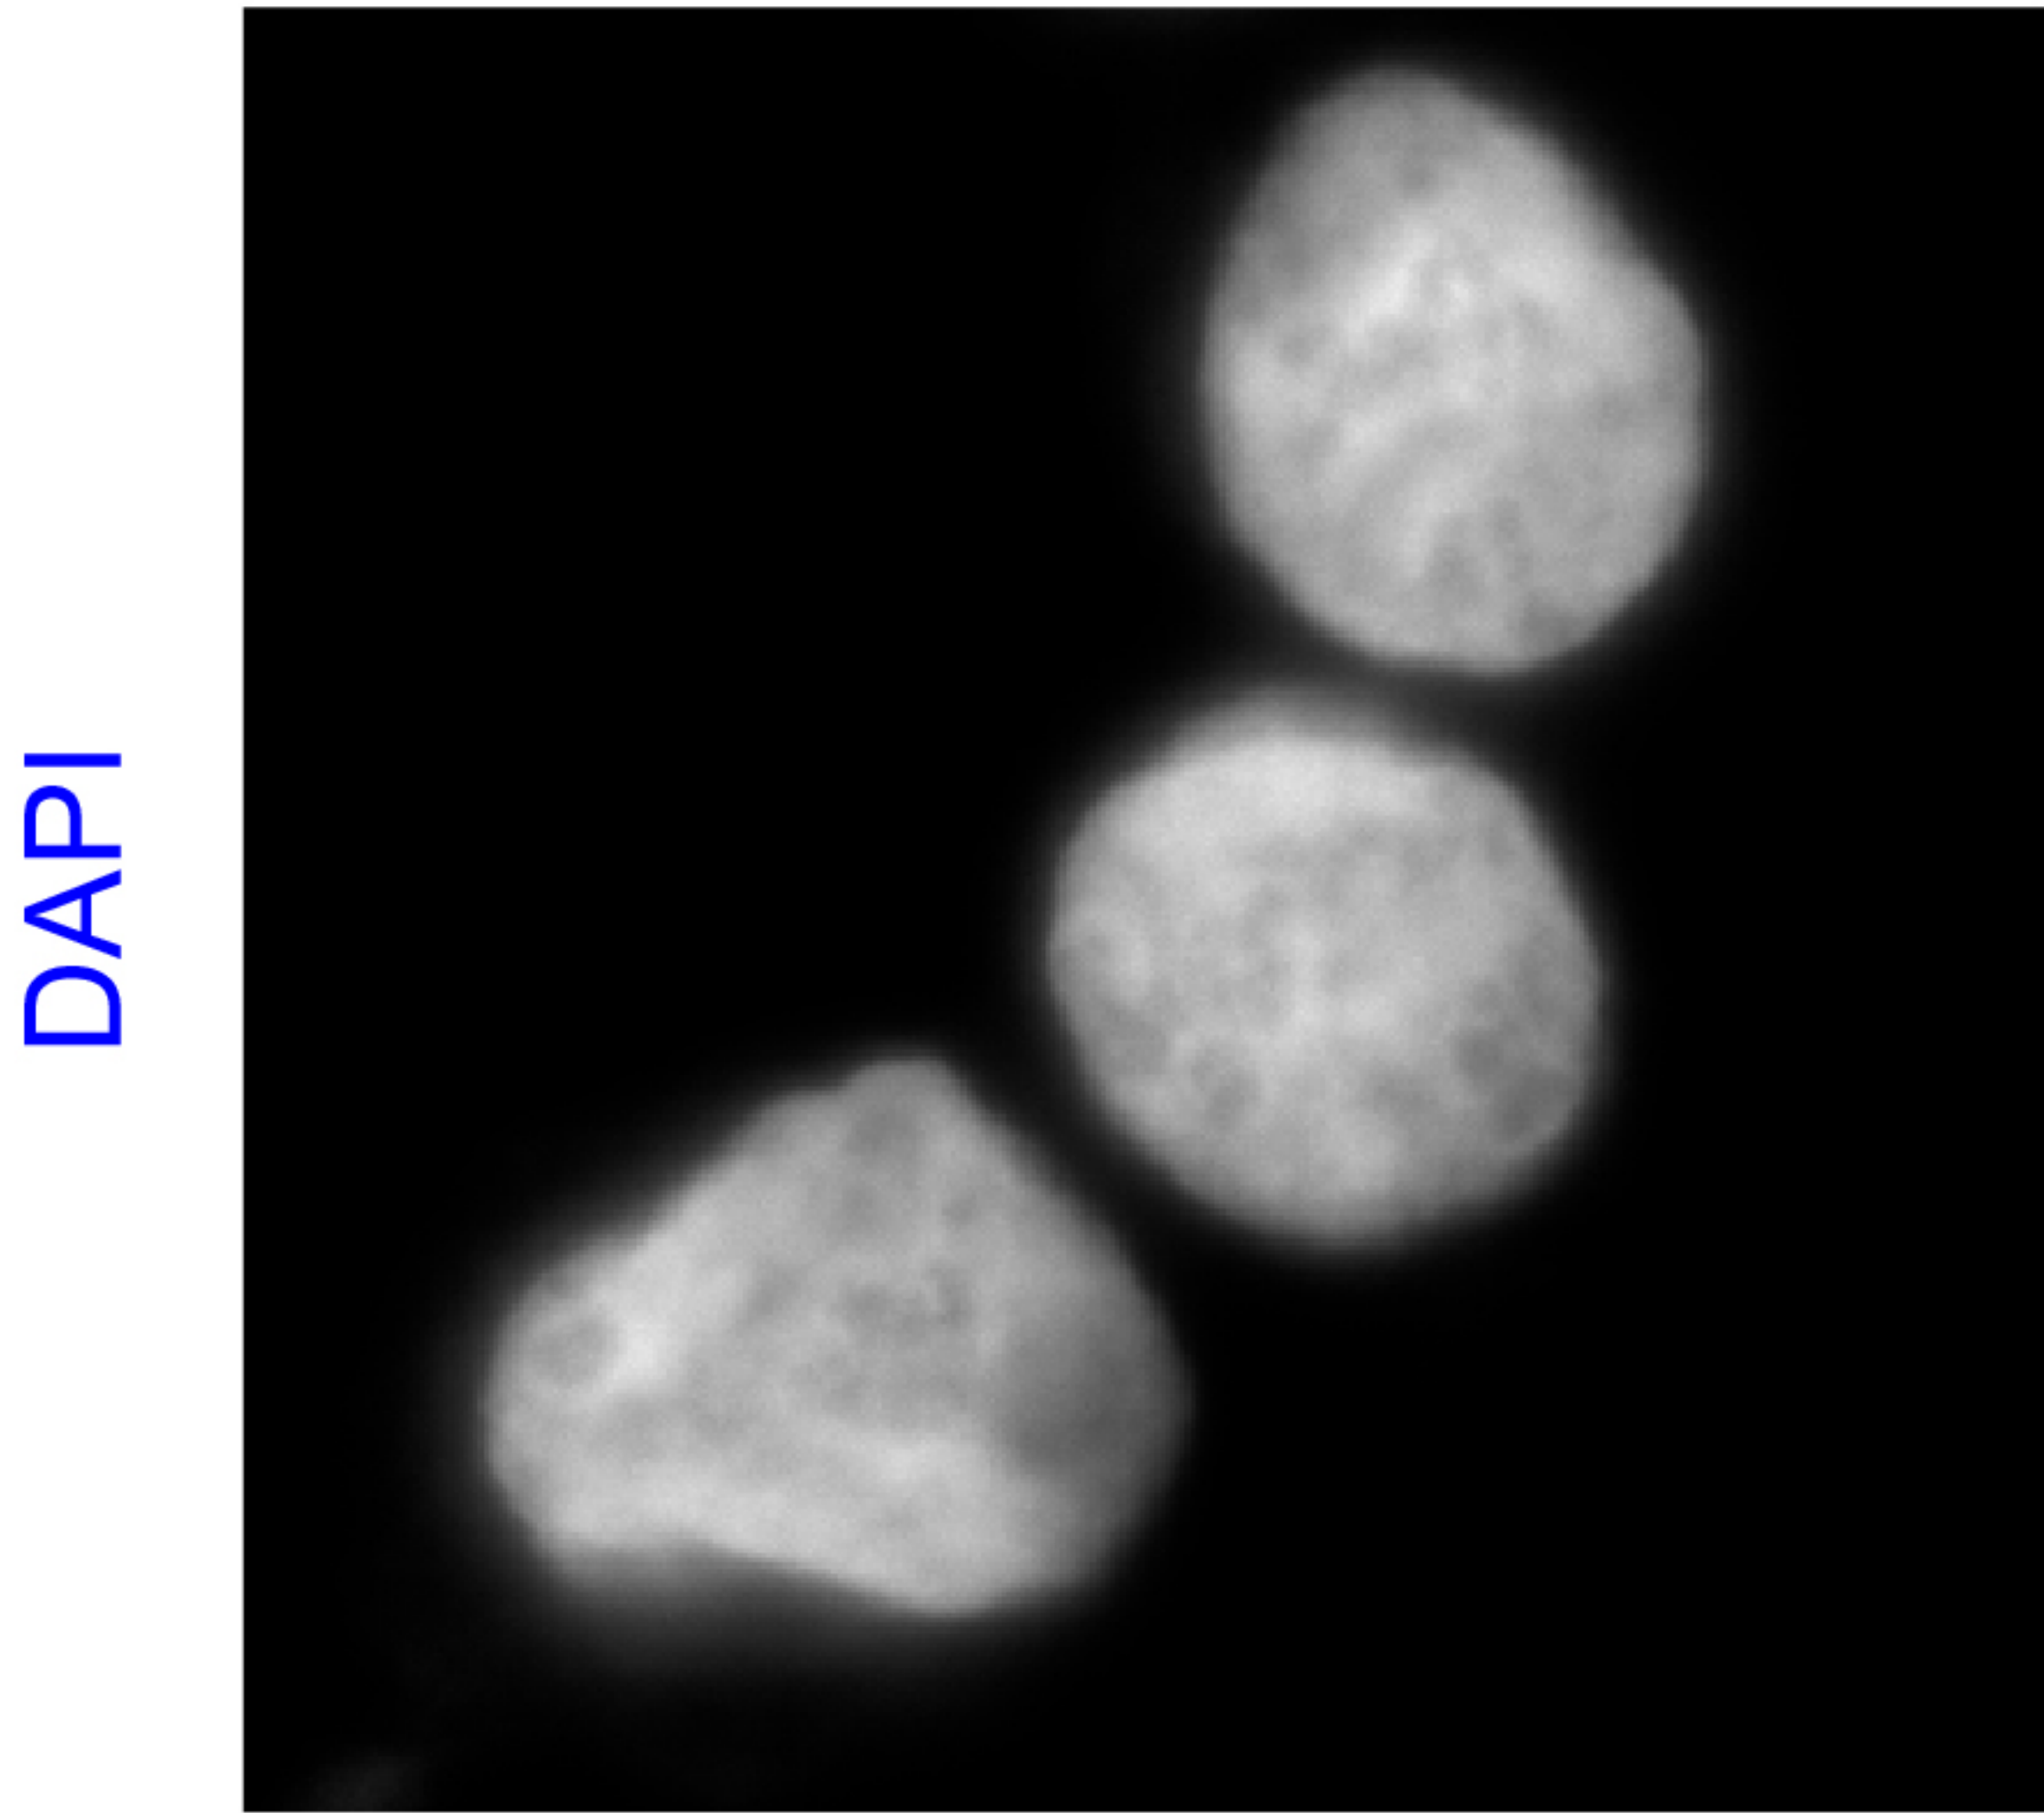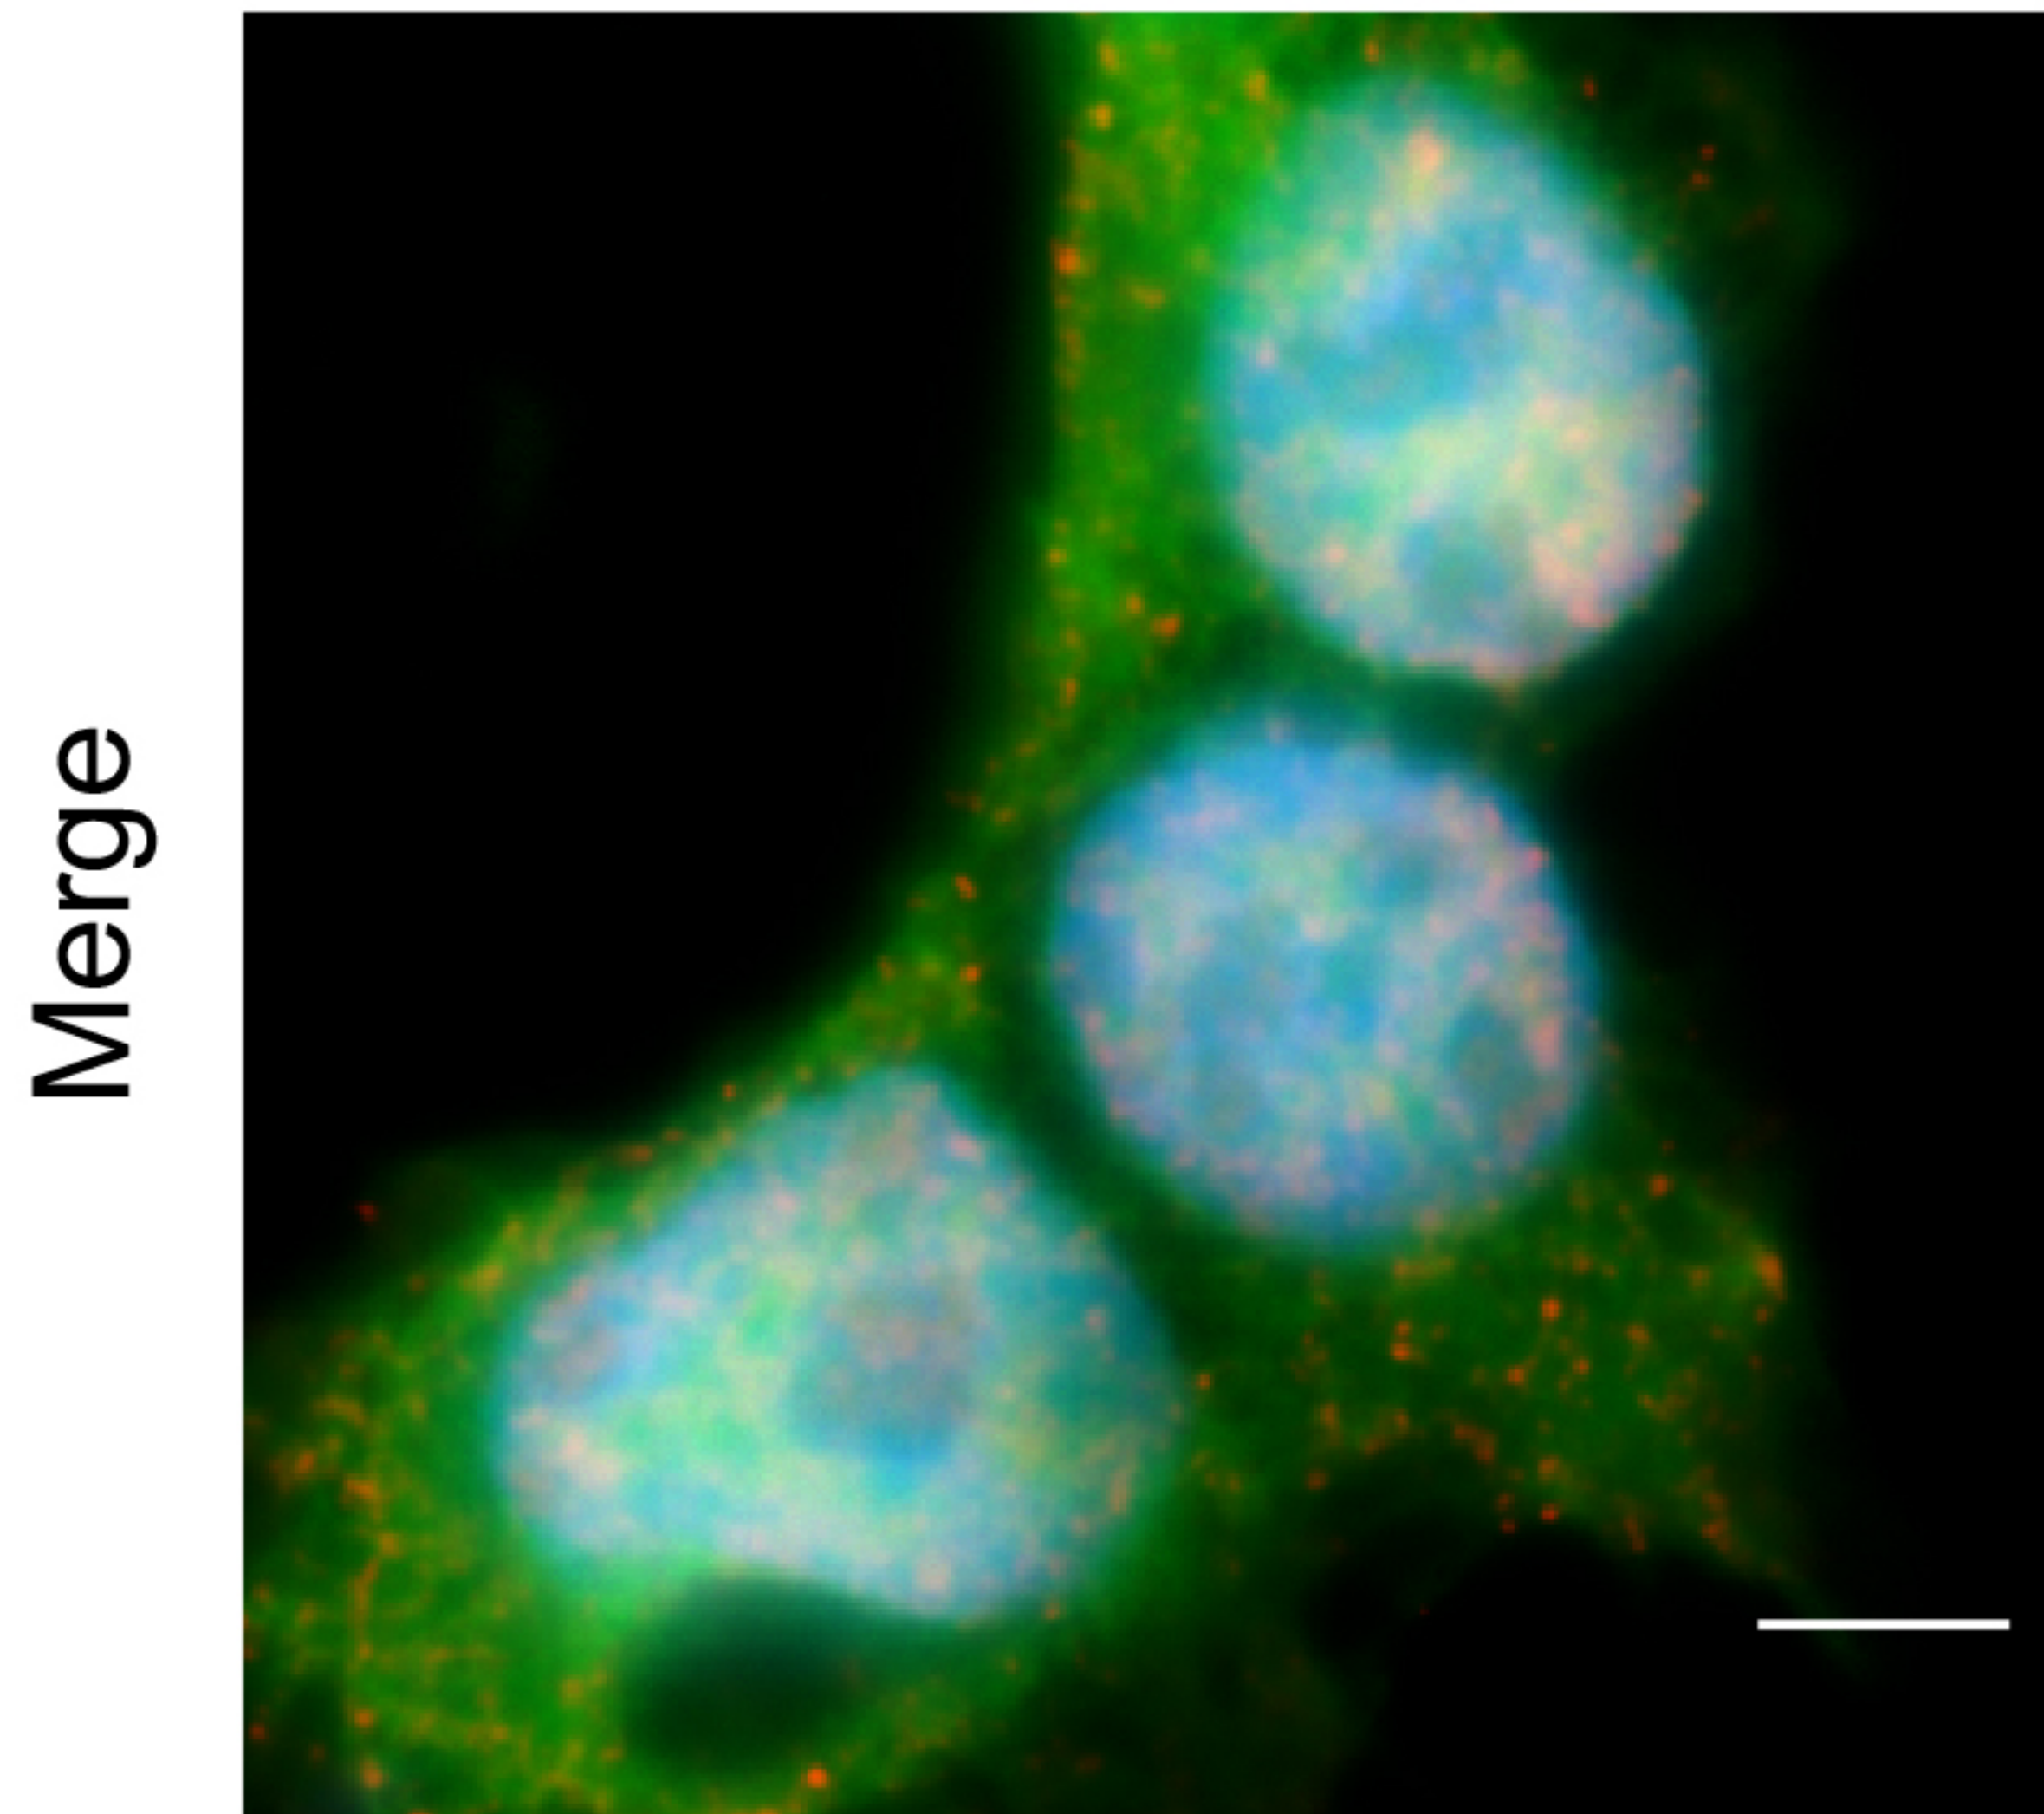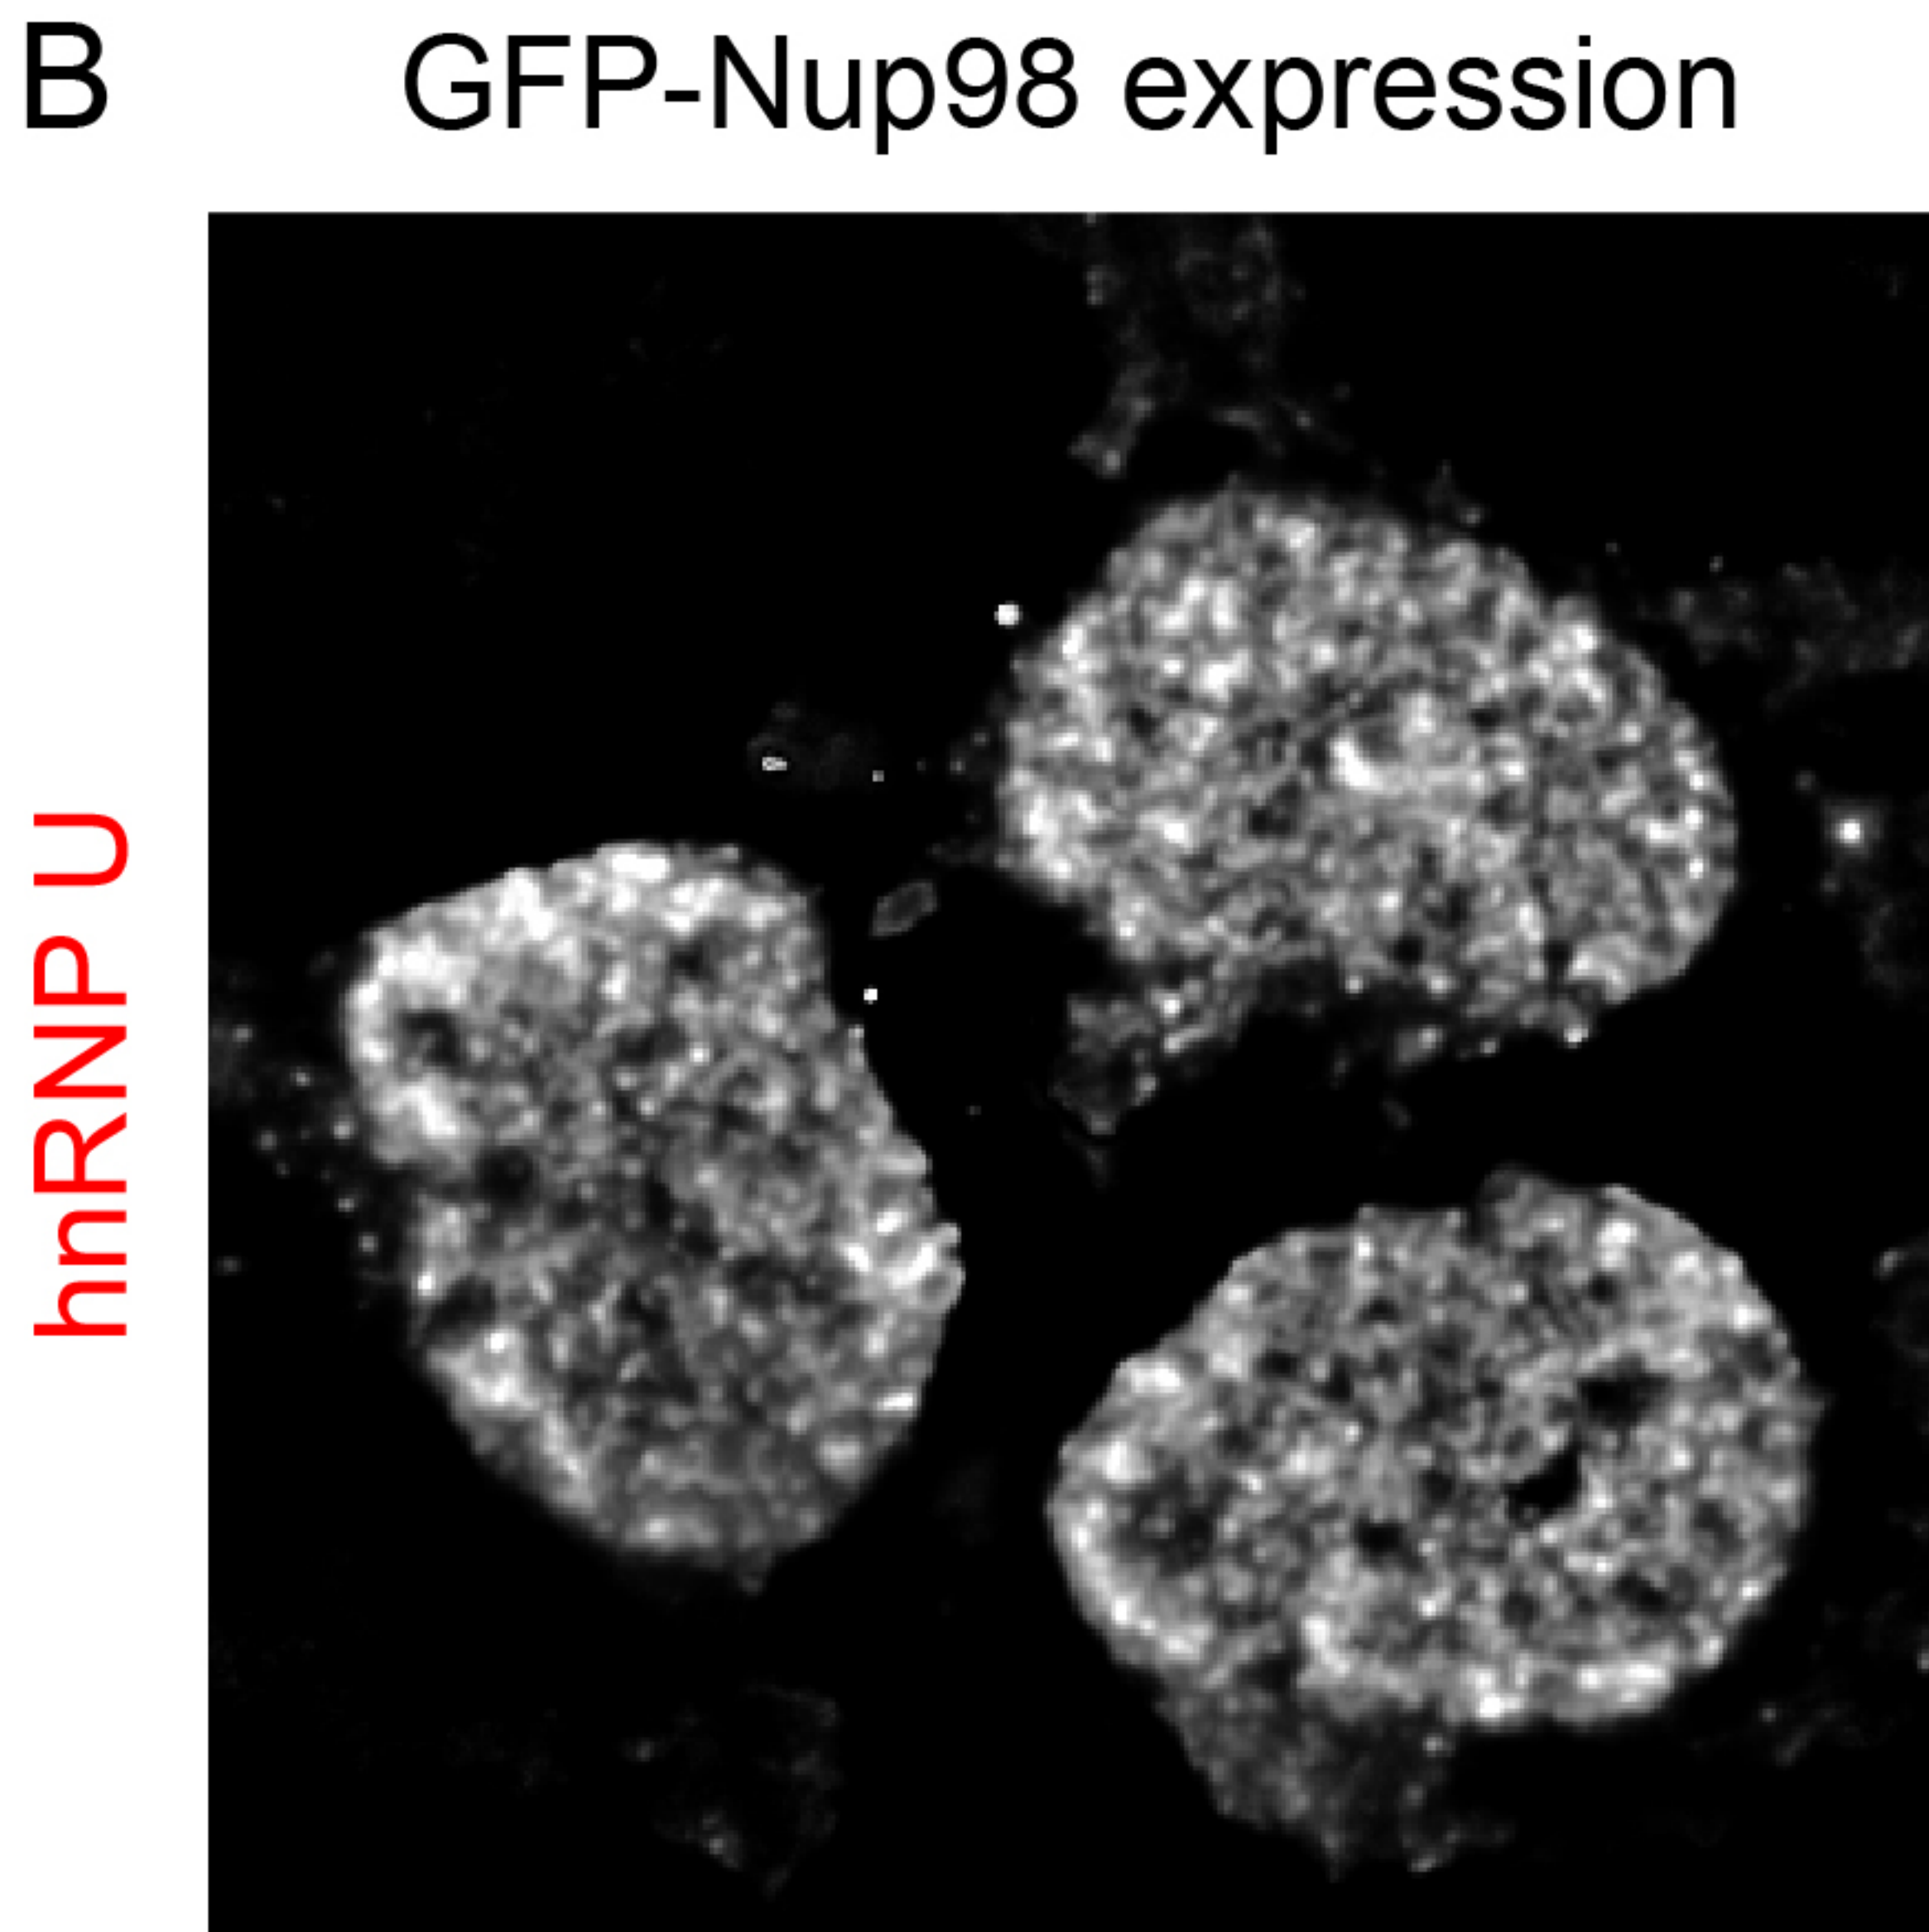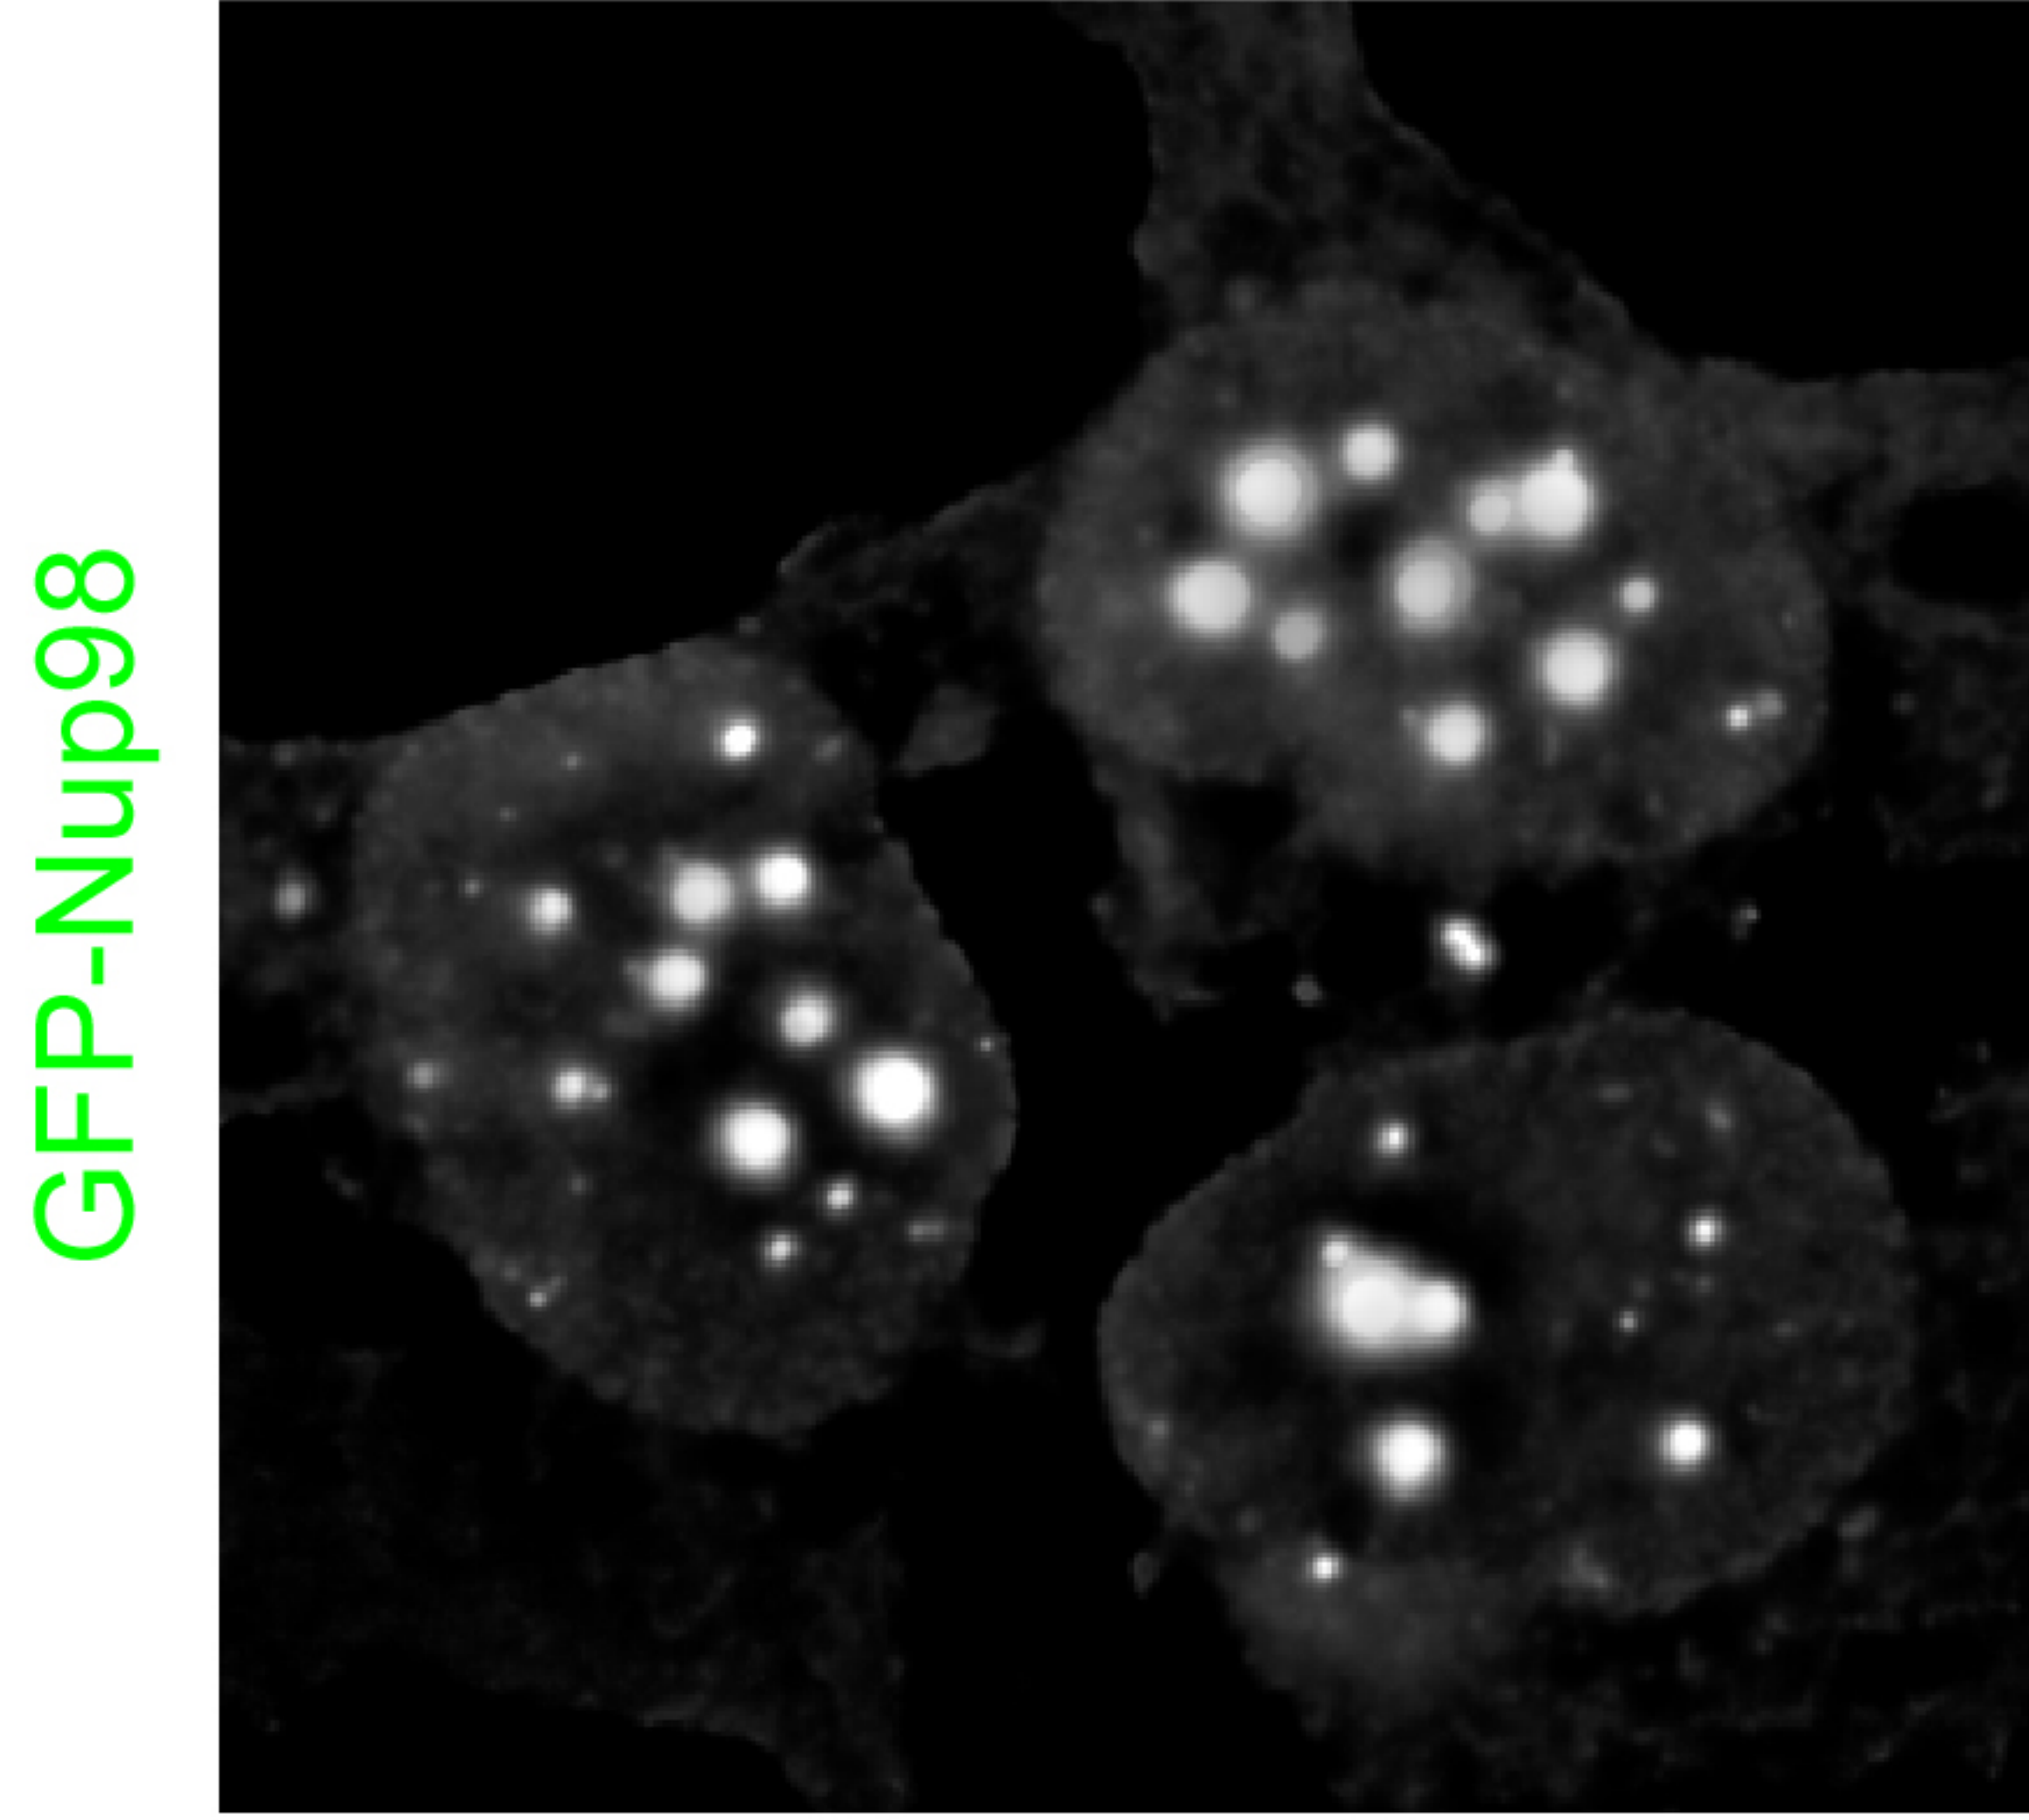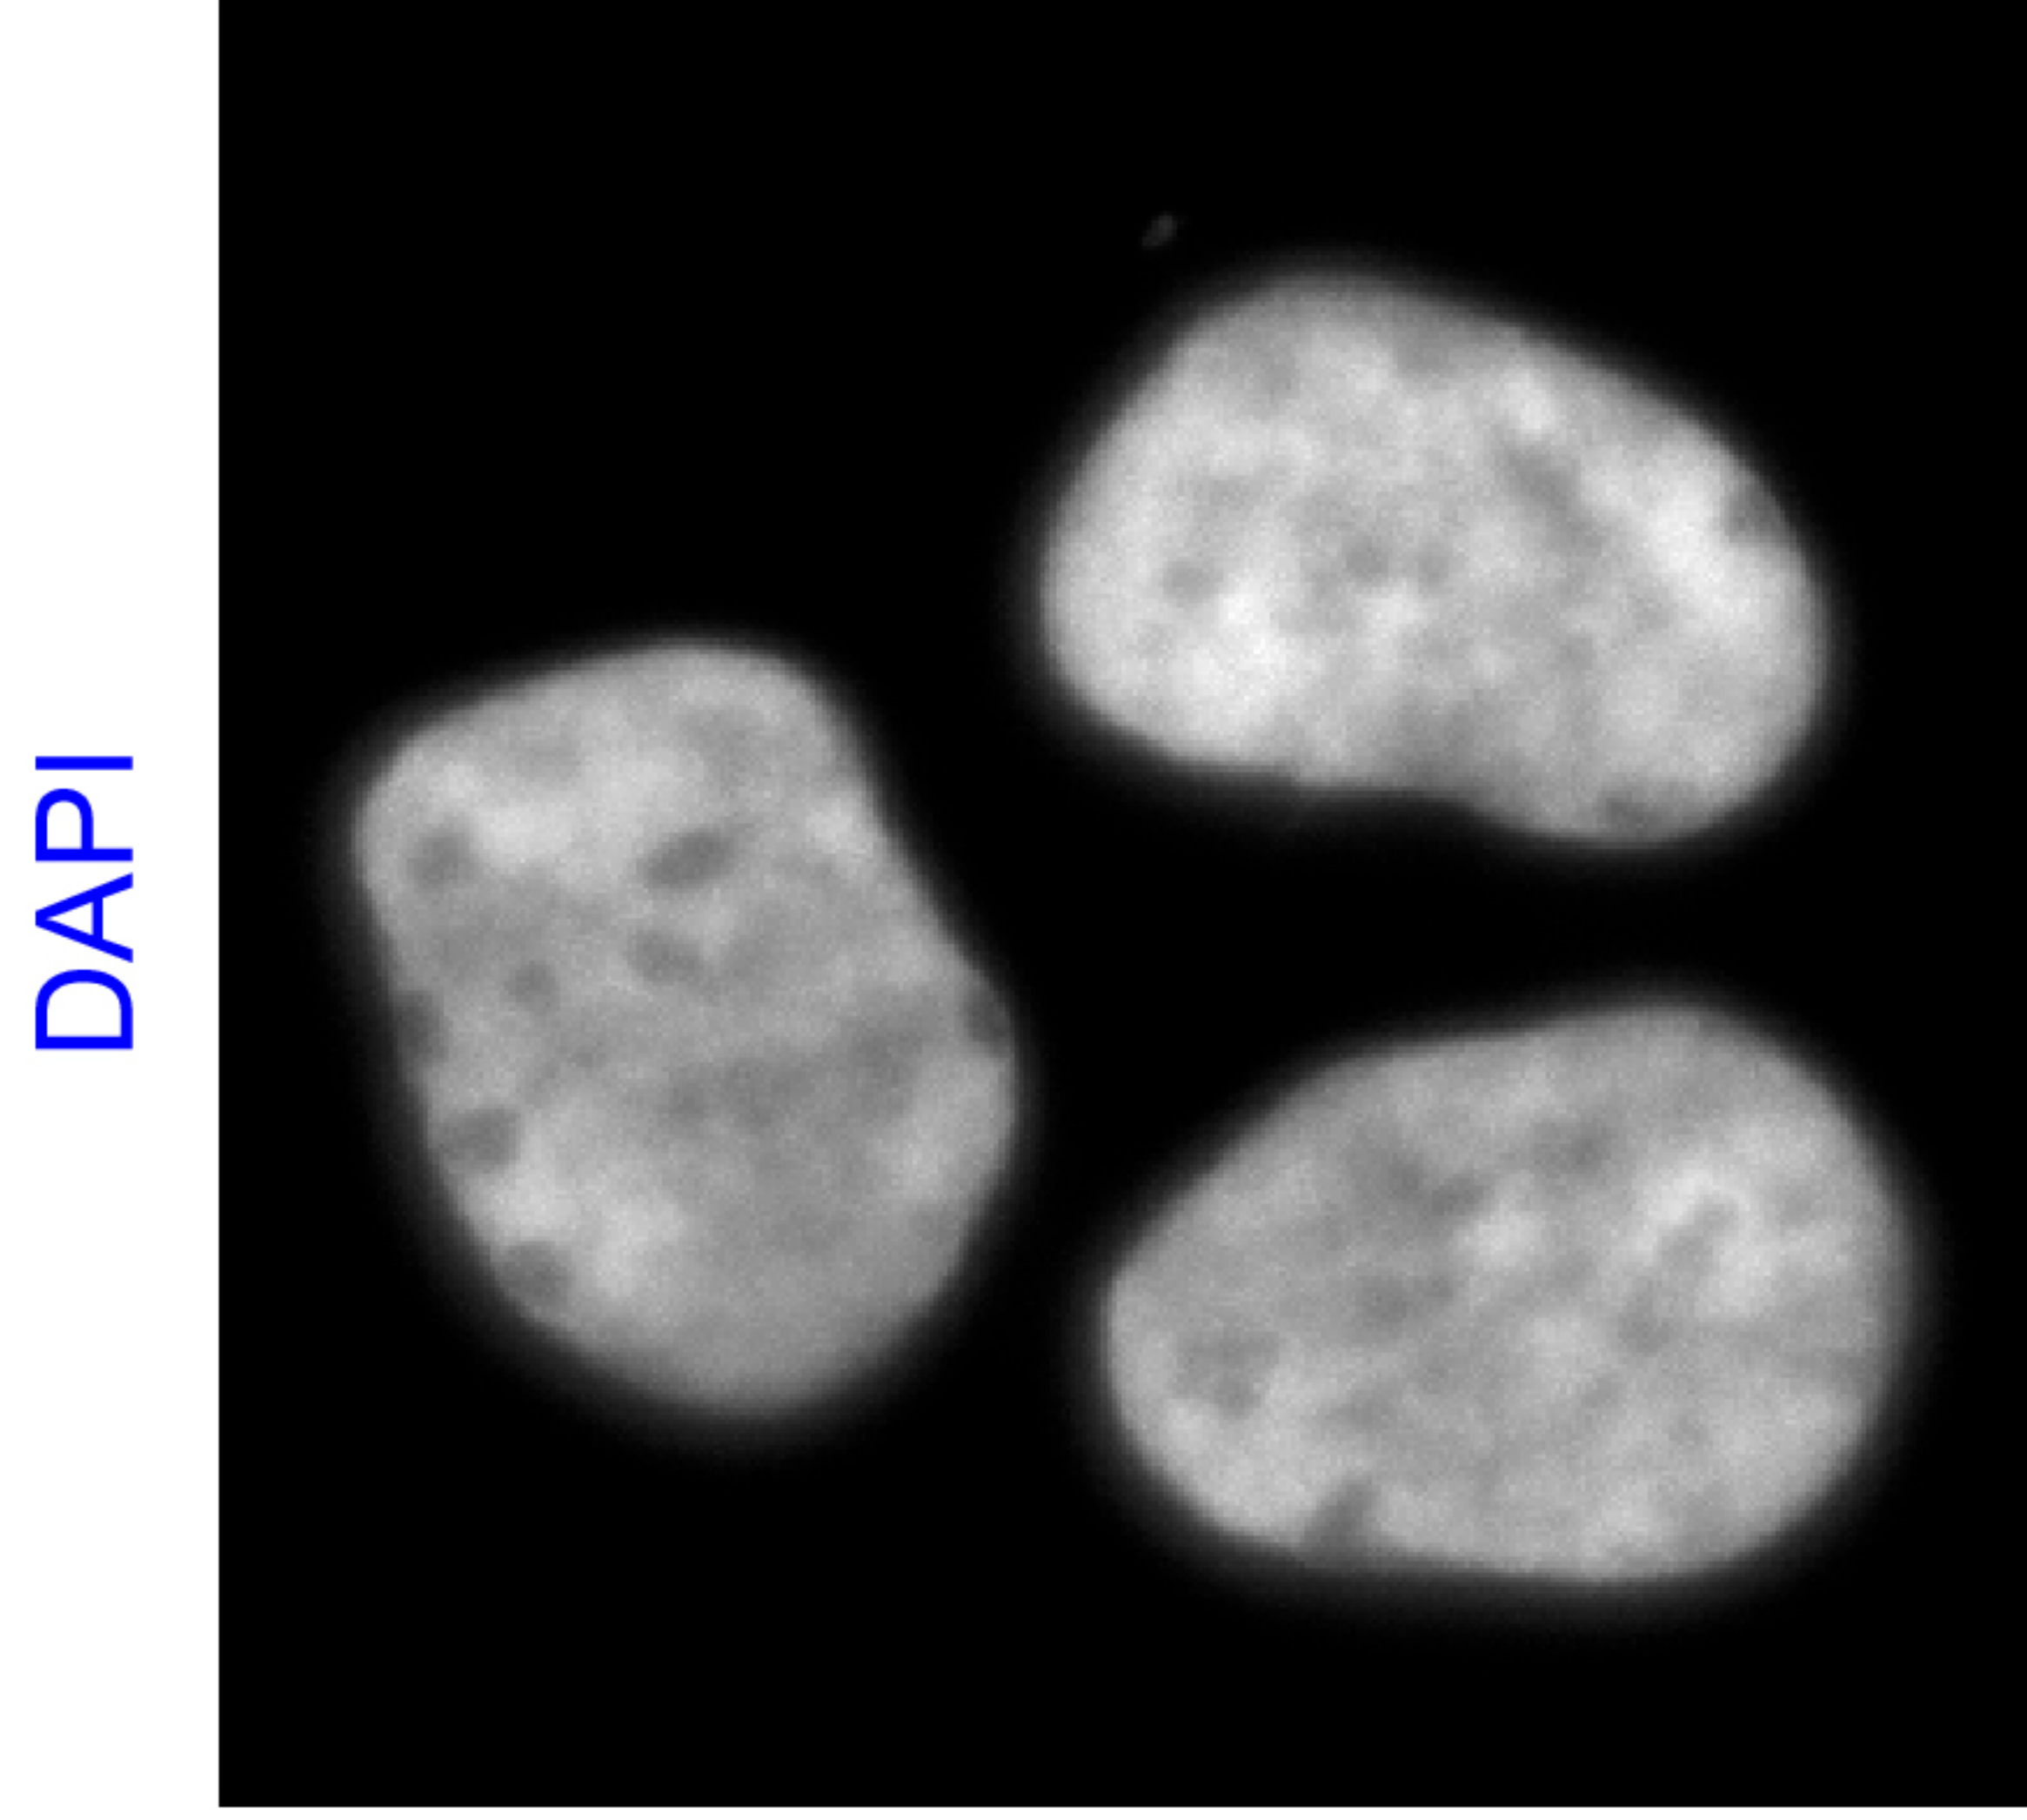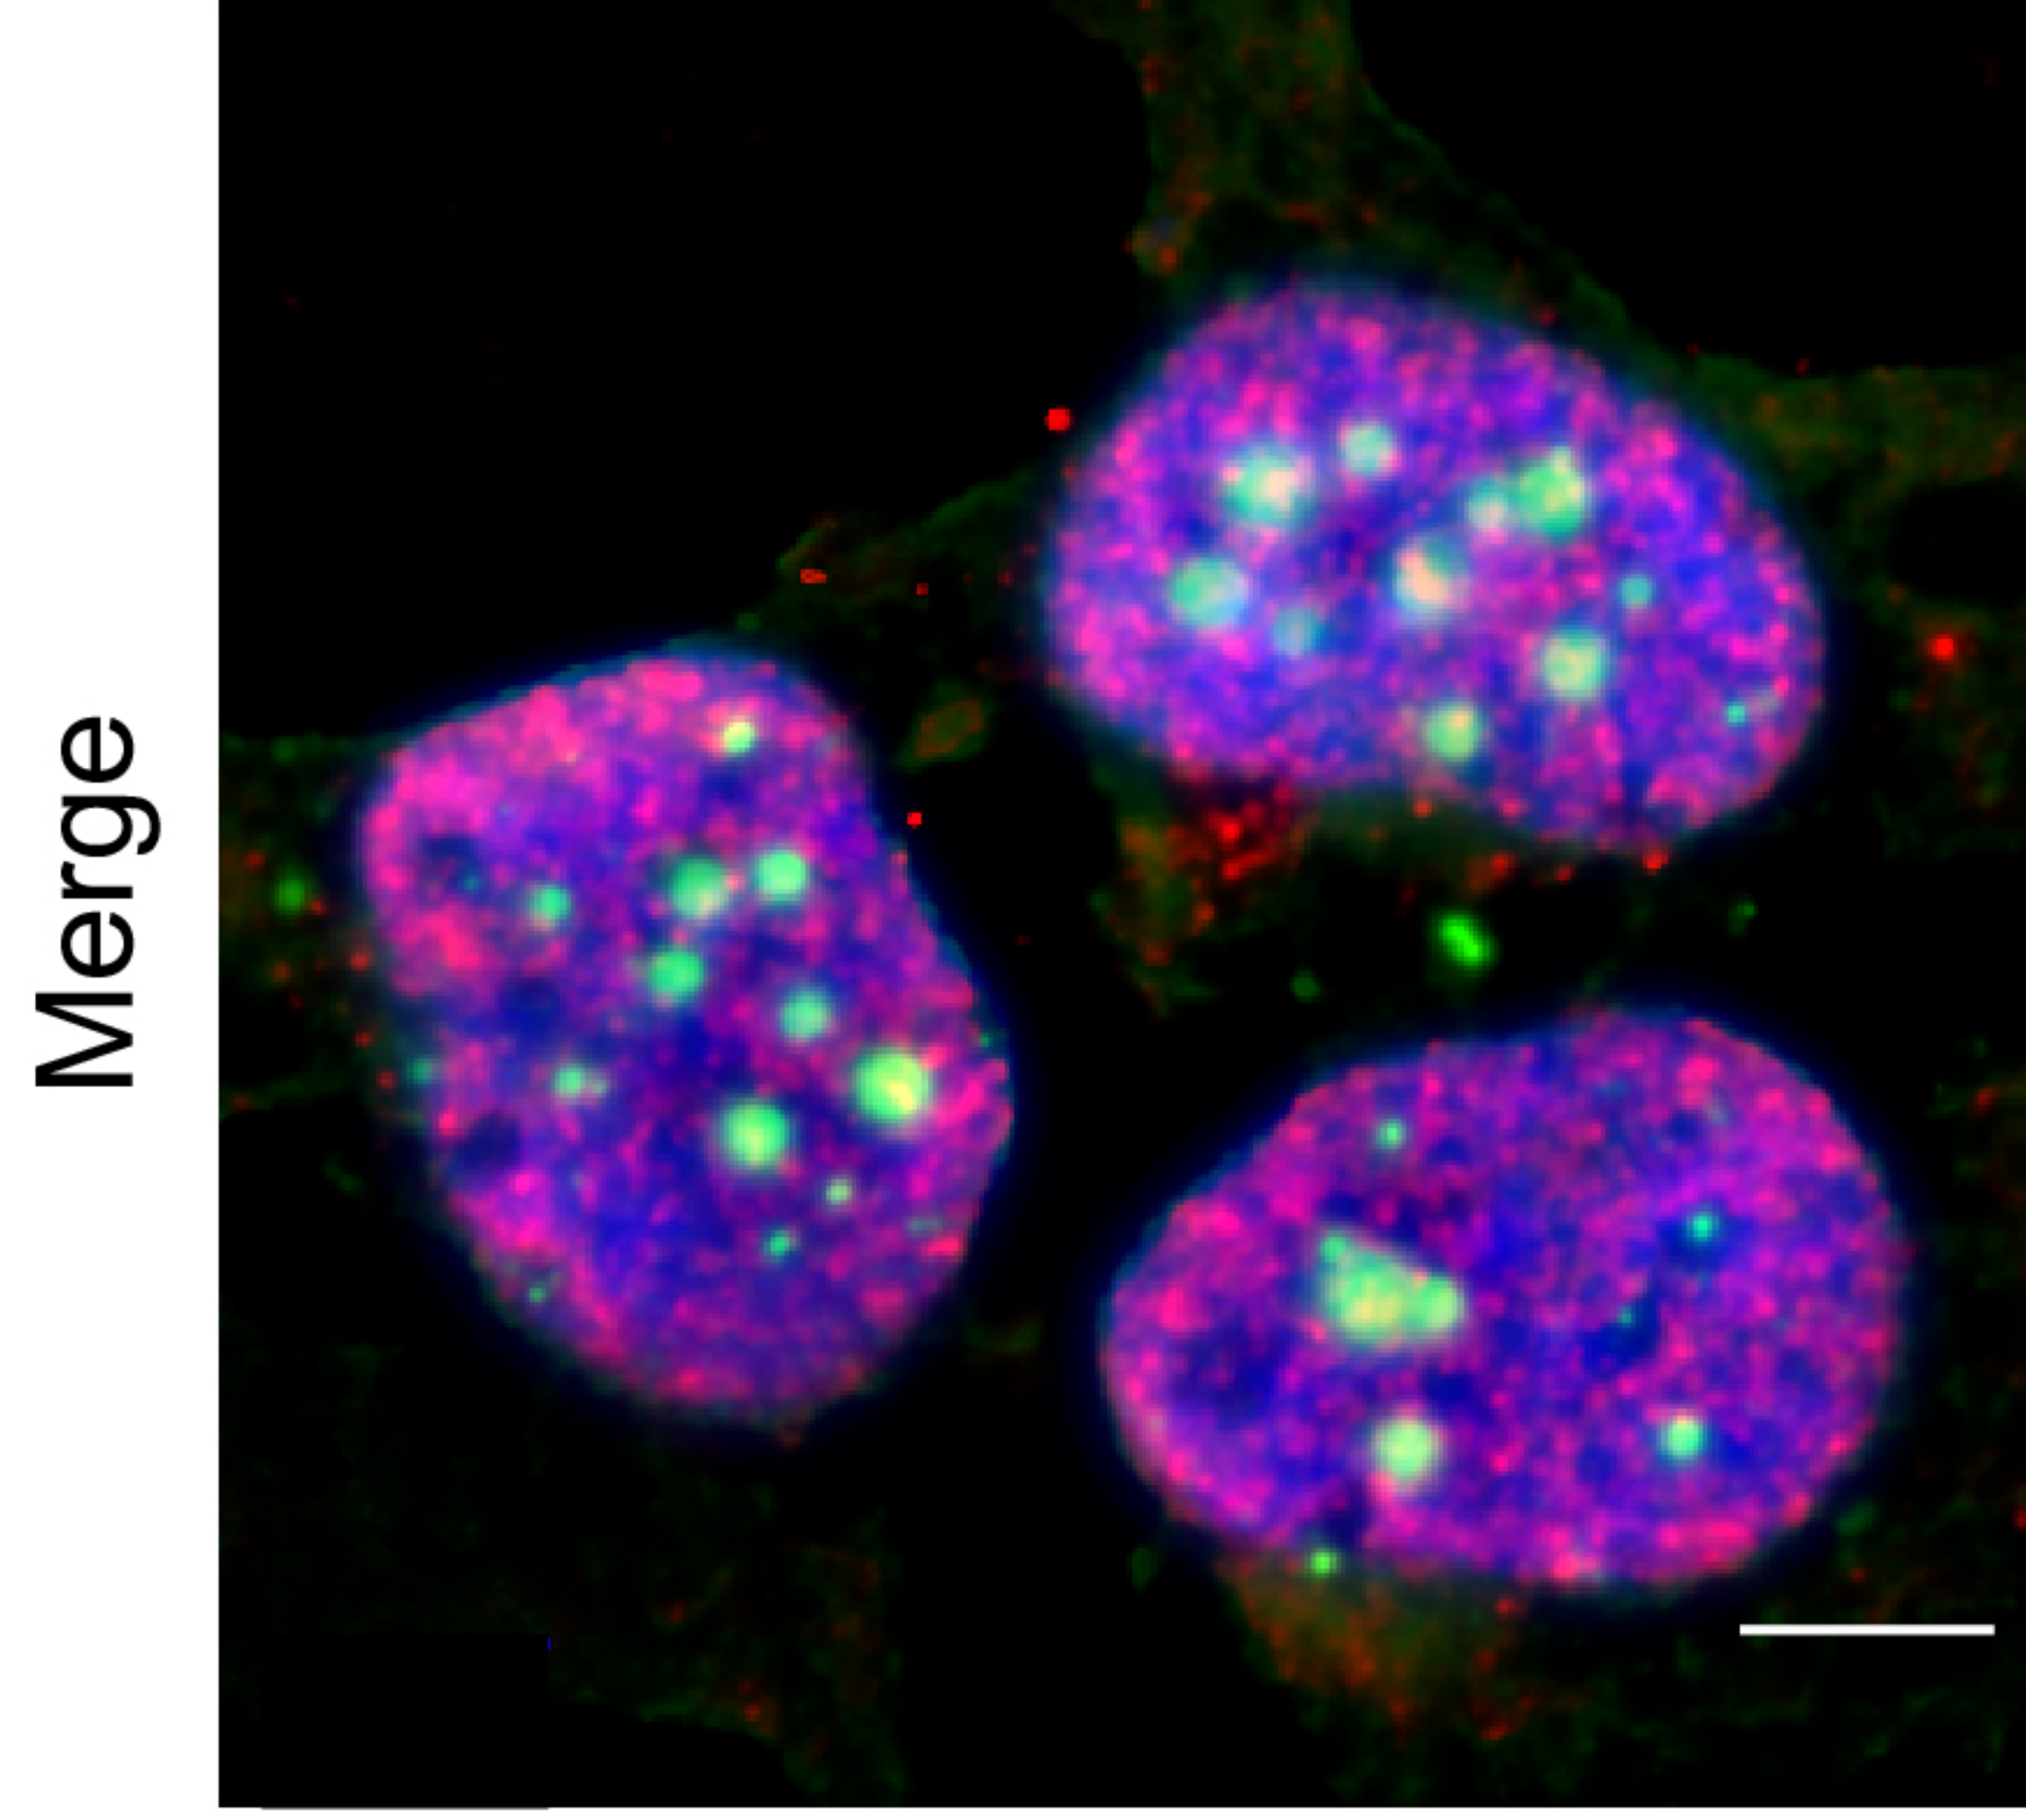

Supplement: supp [file elife-18825-supp-v1.zip]

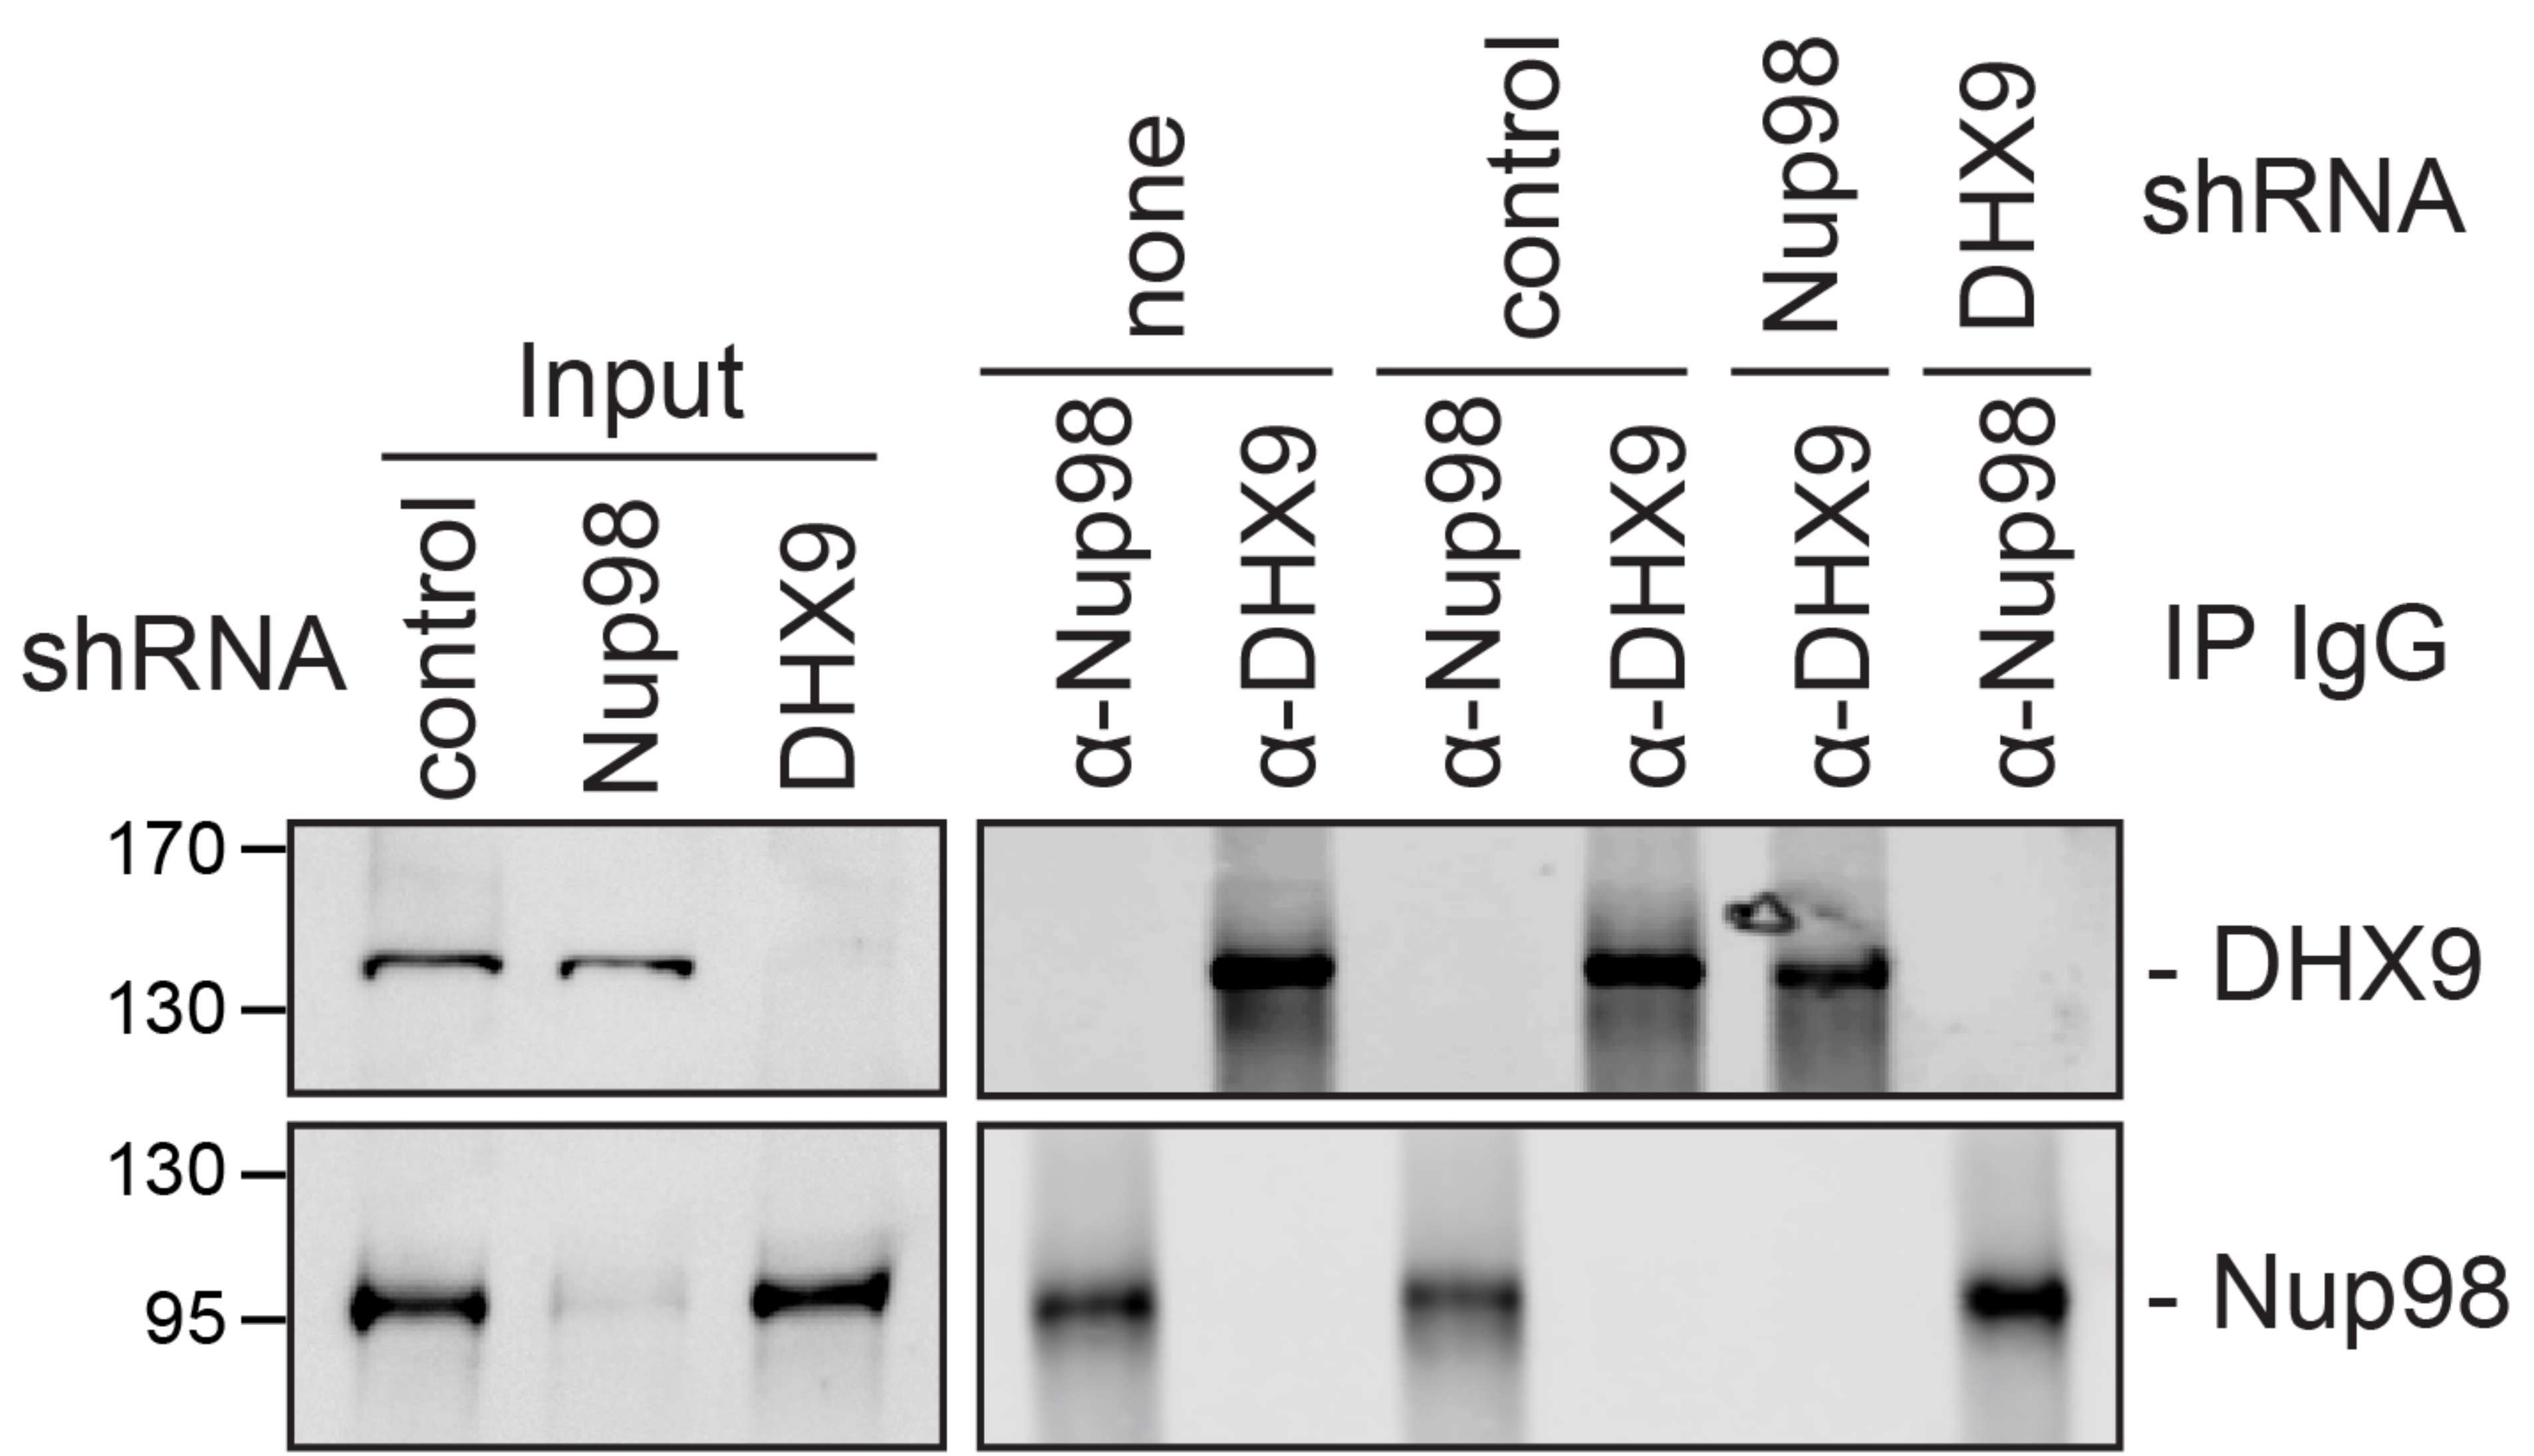

Supplement: supp [file elife-18825-supp-v1.zip]

control shRNA

DHX9 shRNA

DHX9

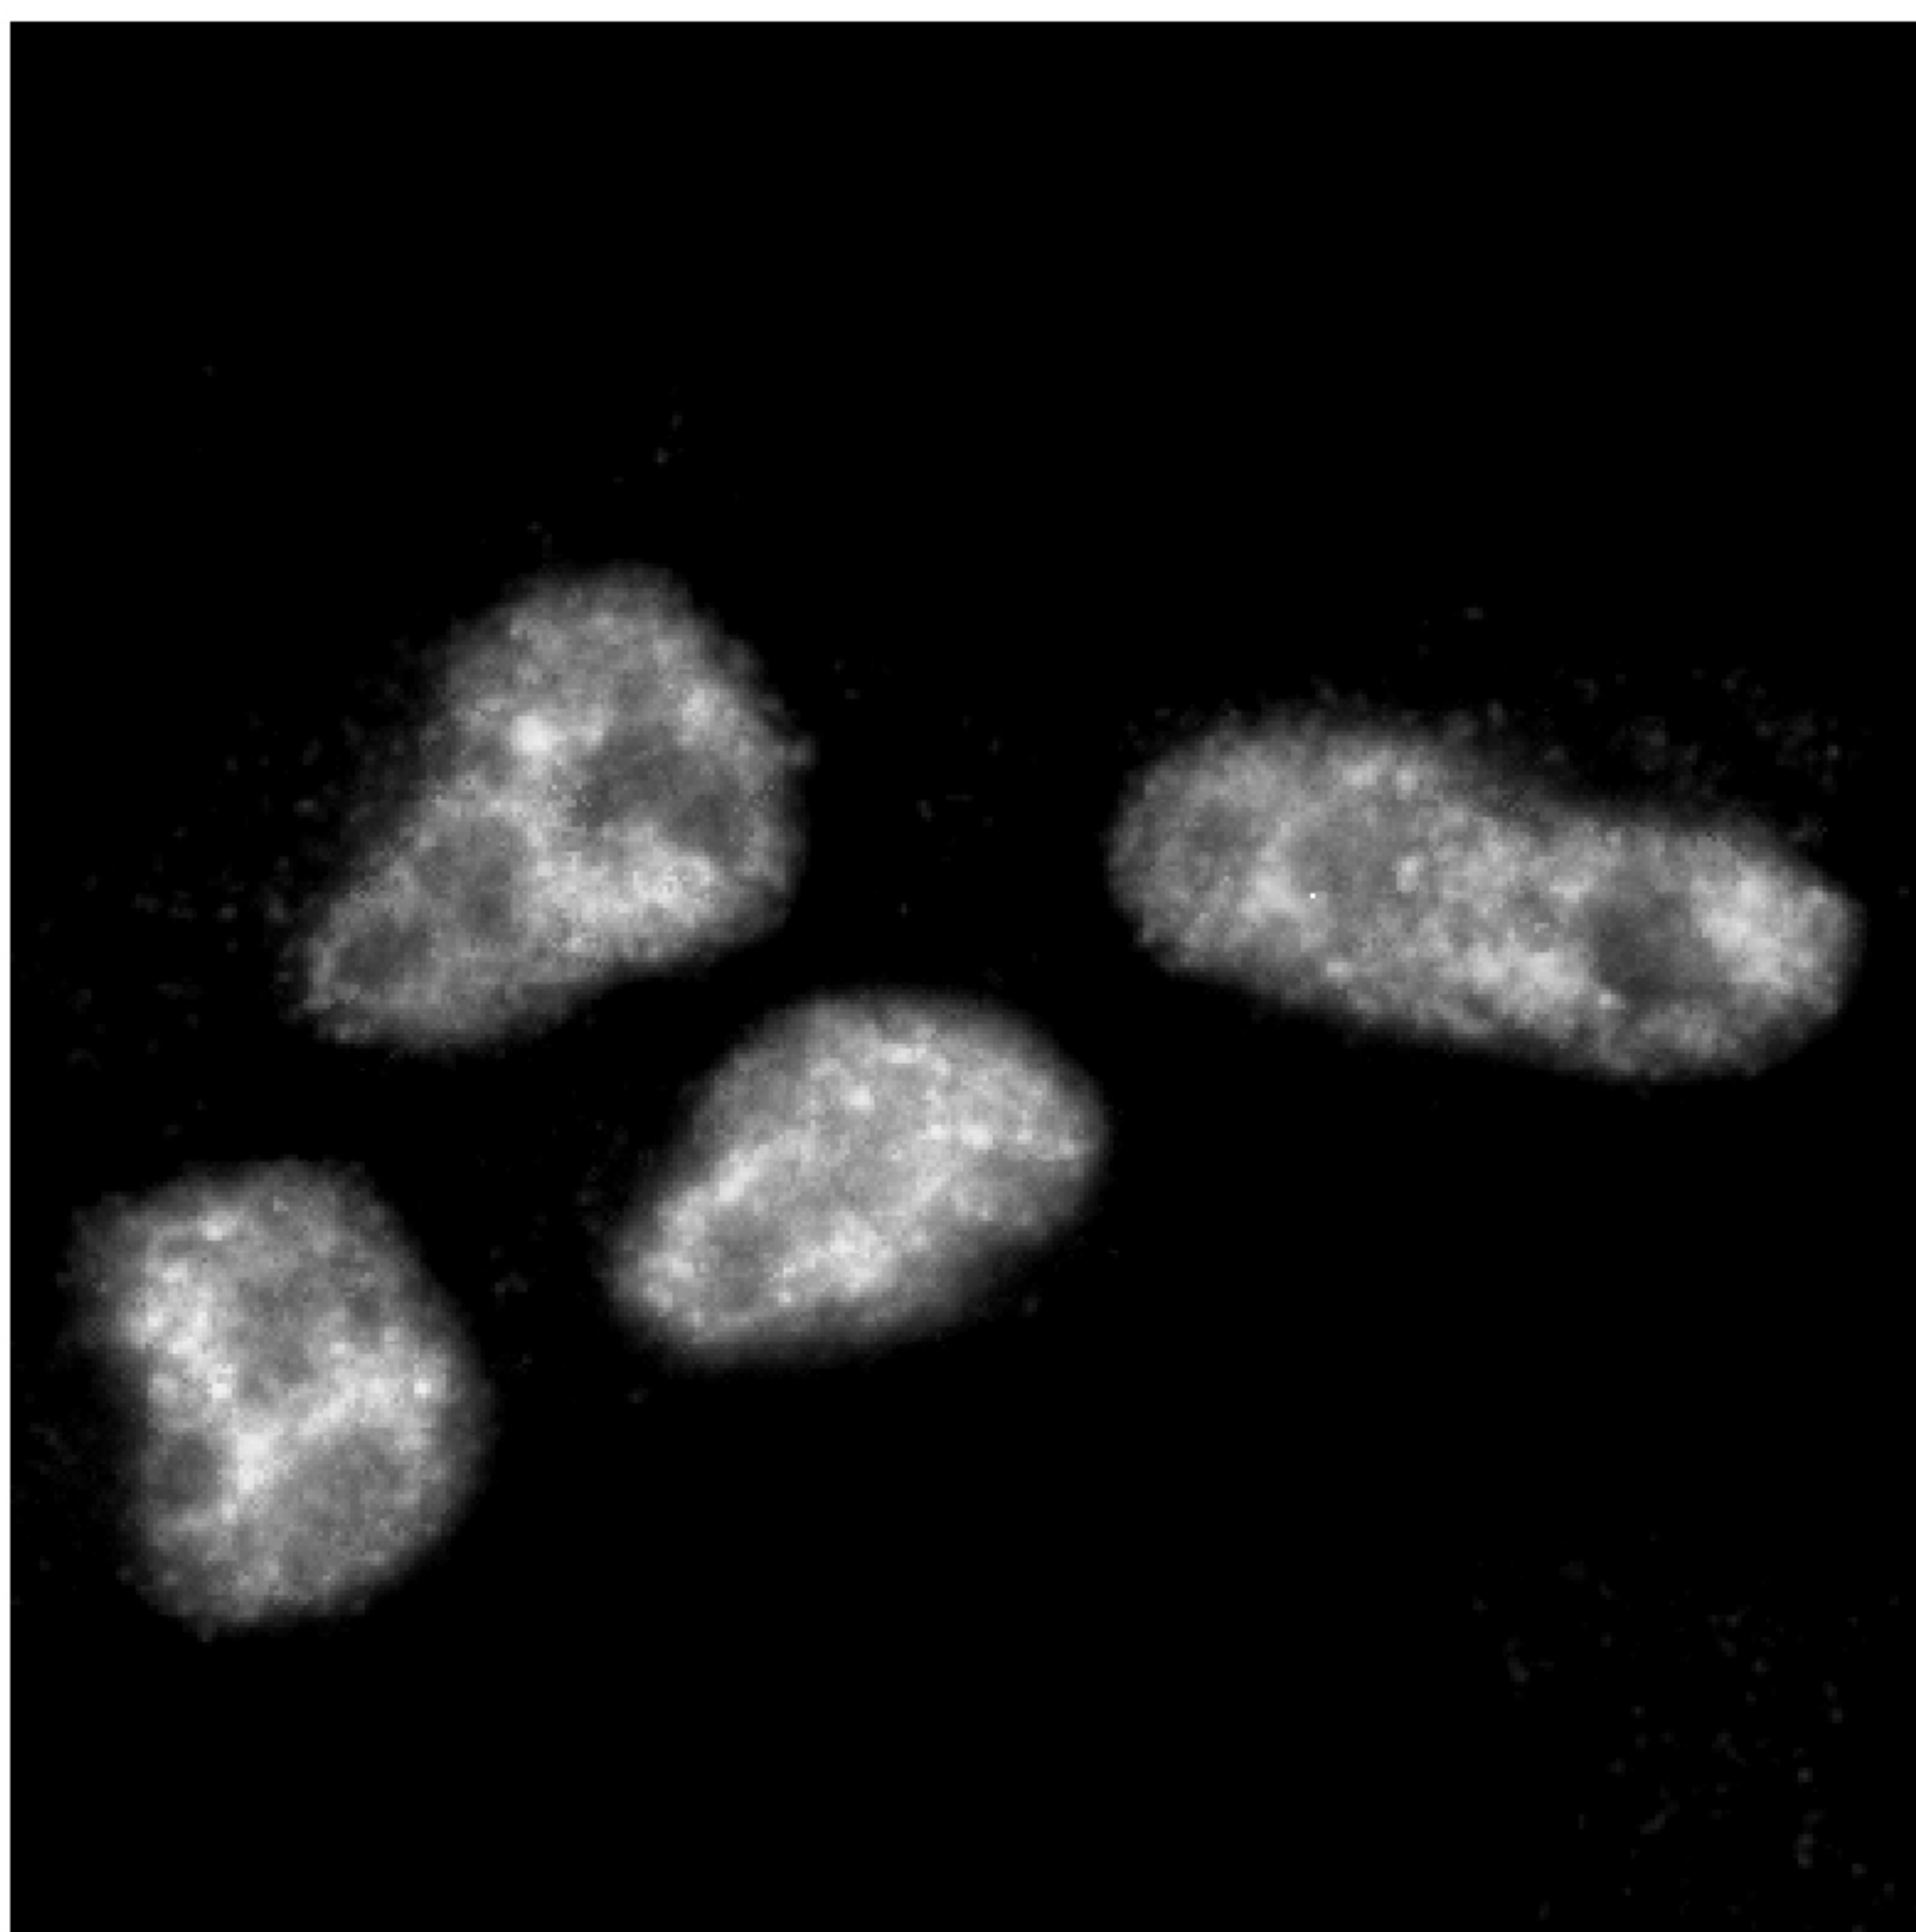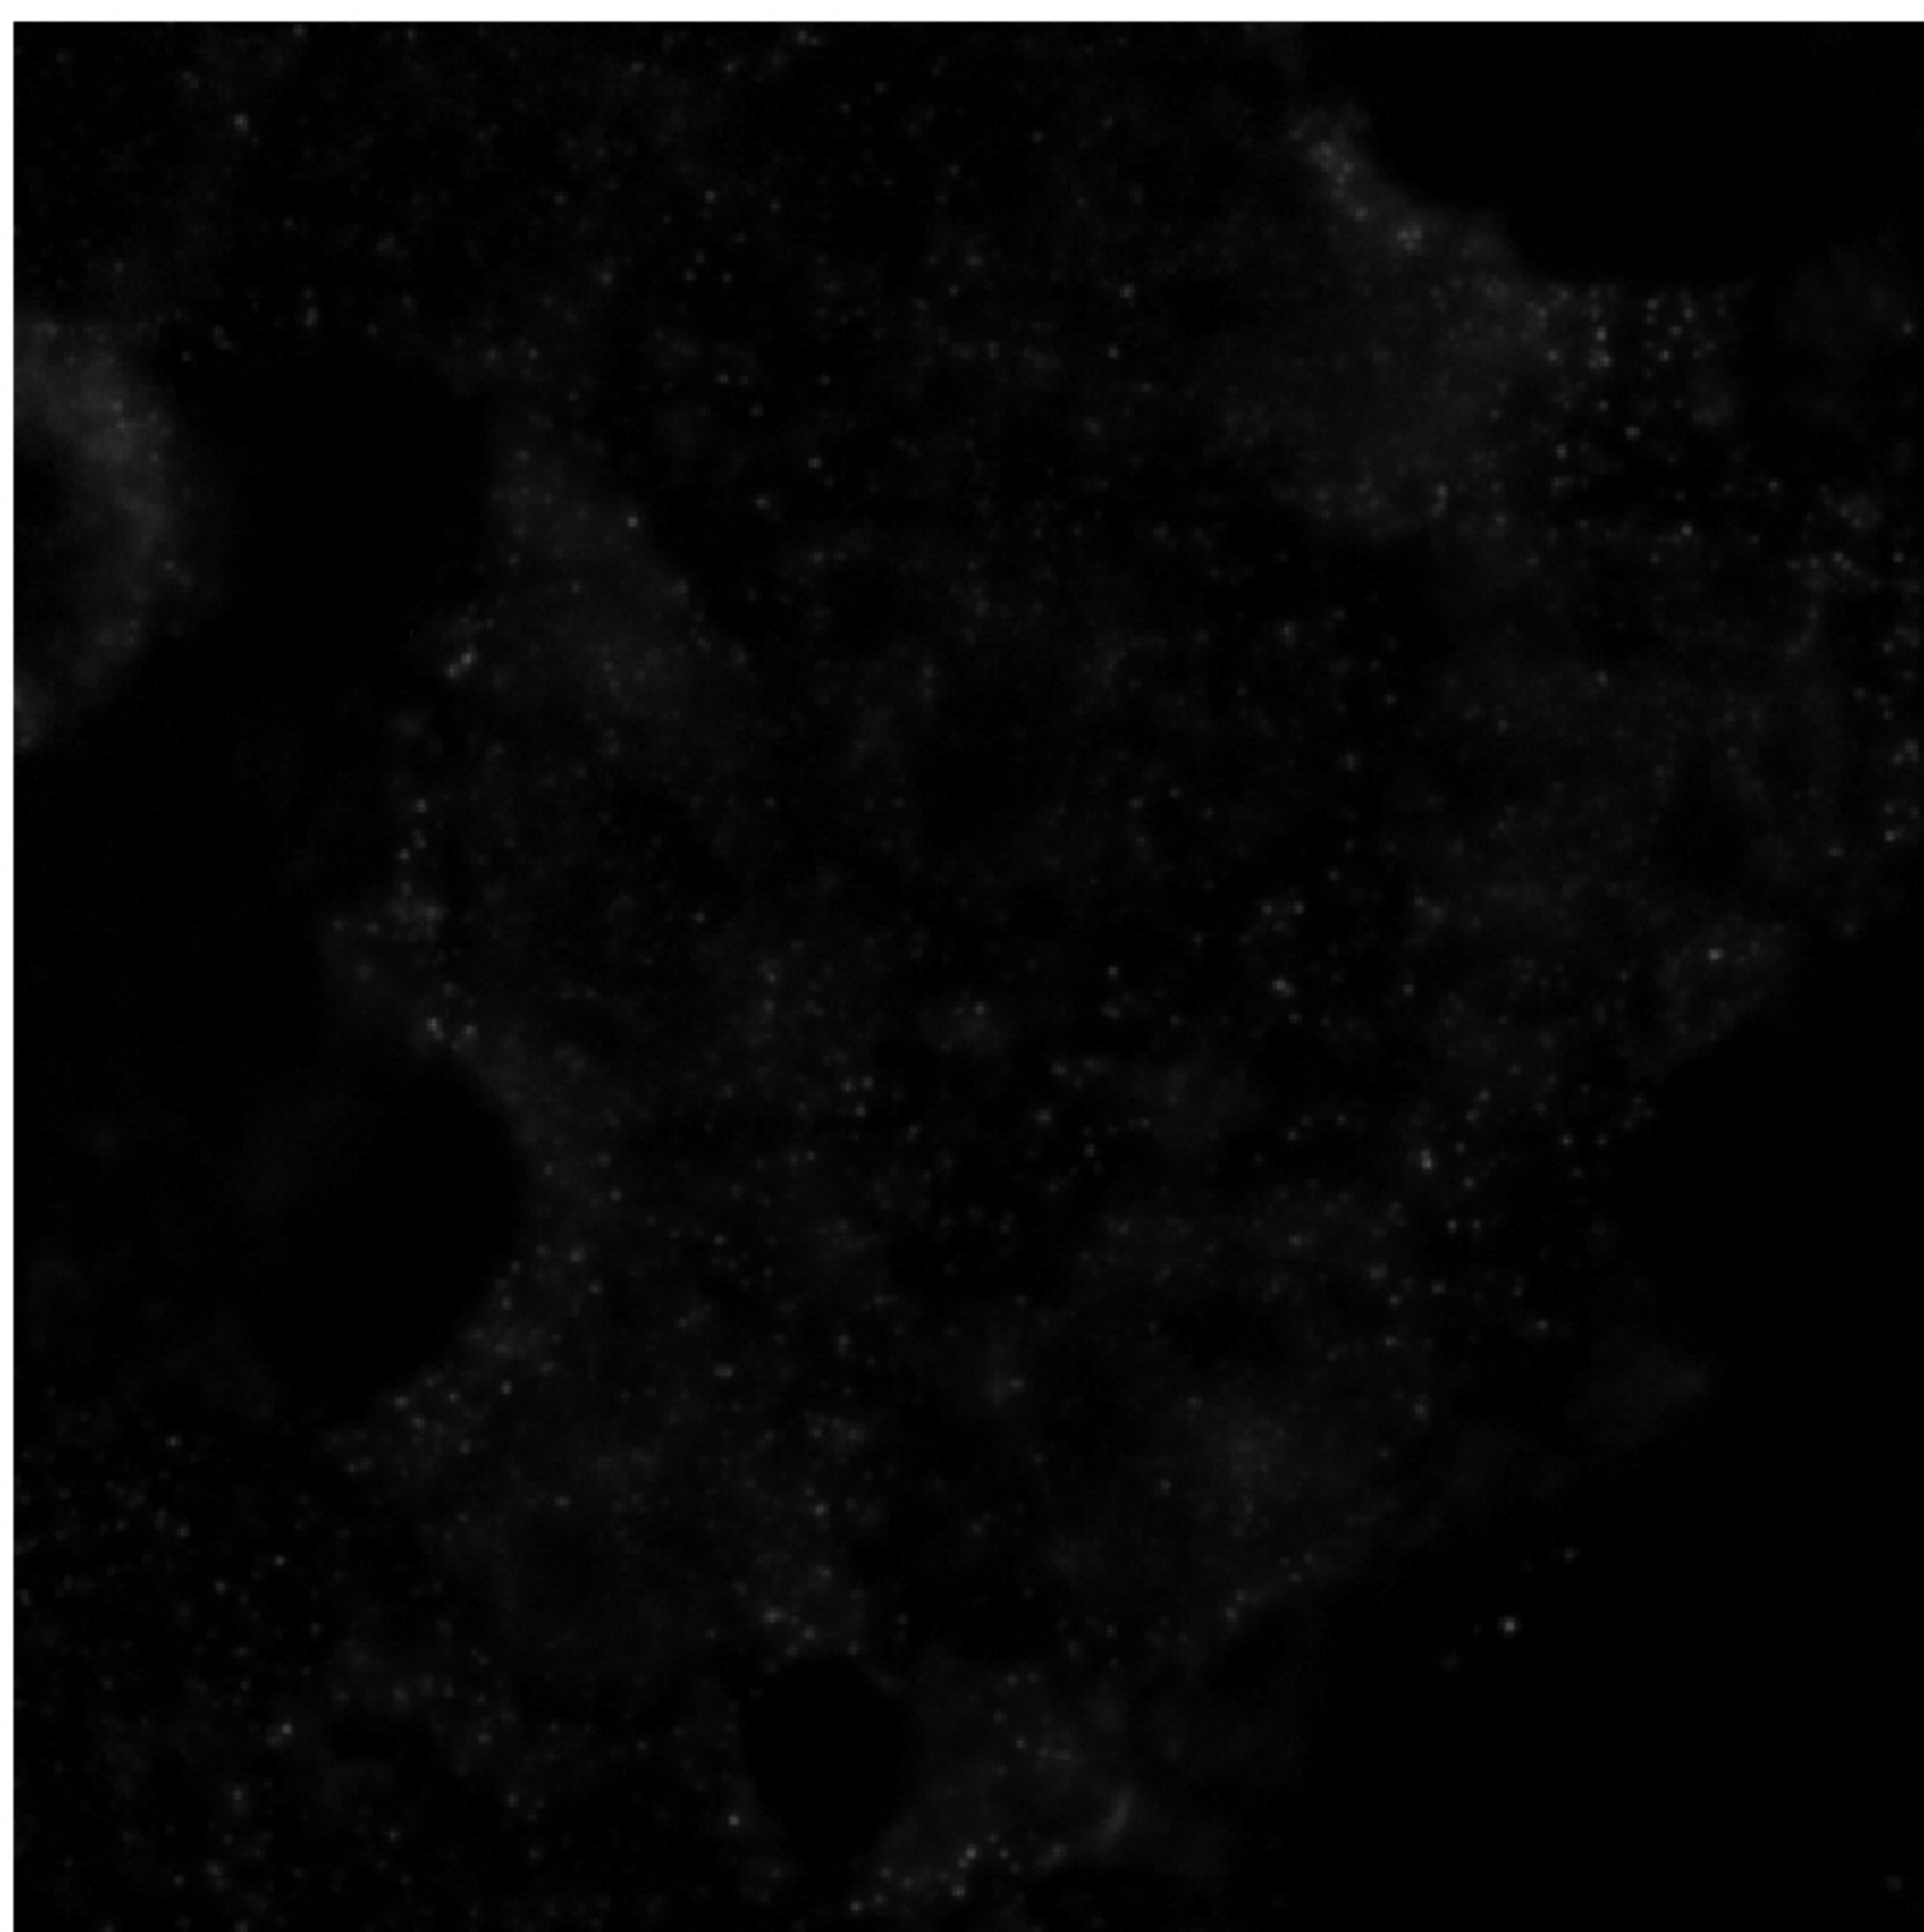

Nup98

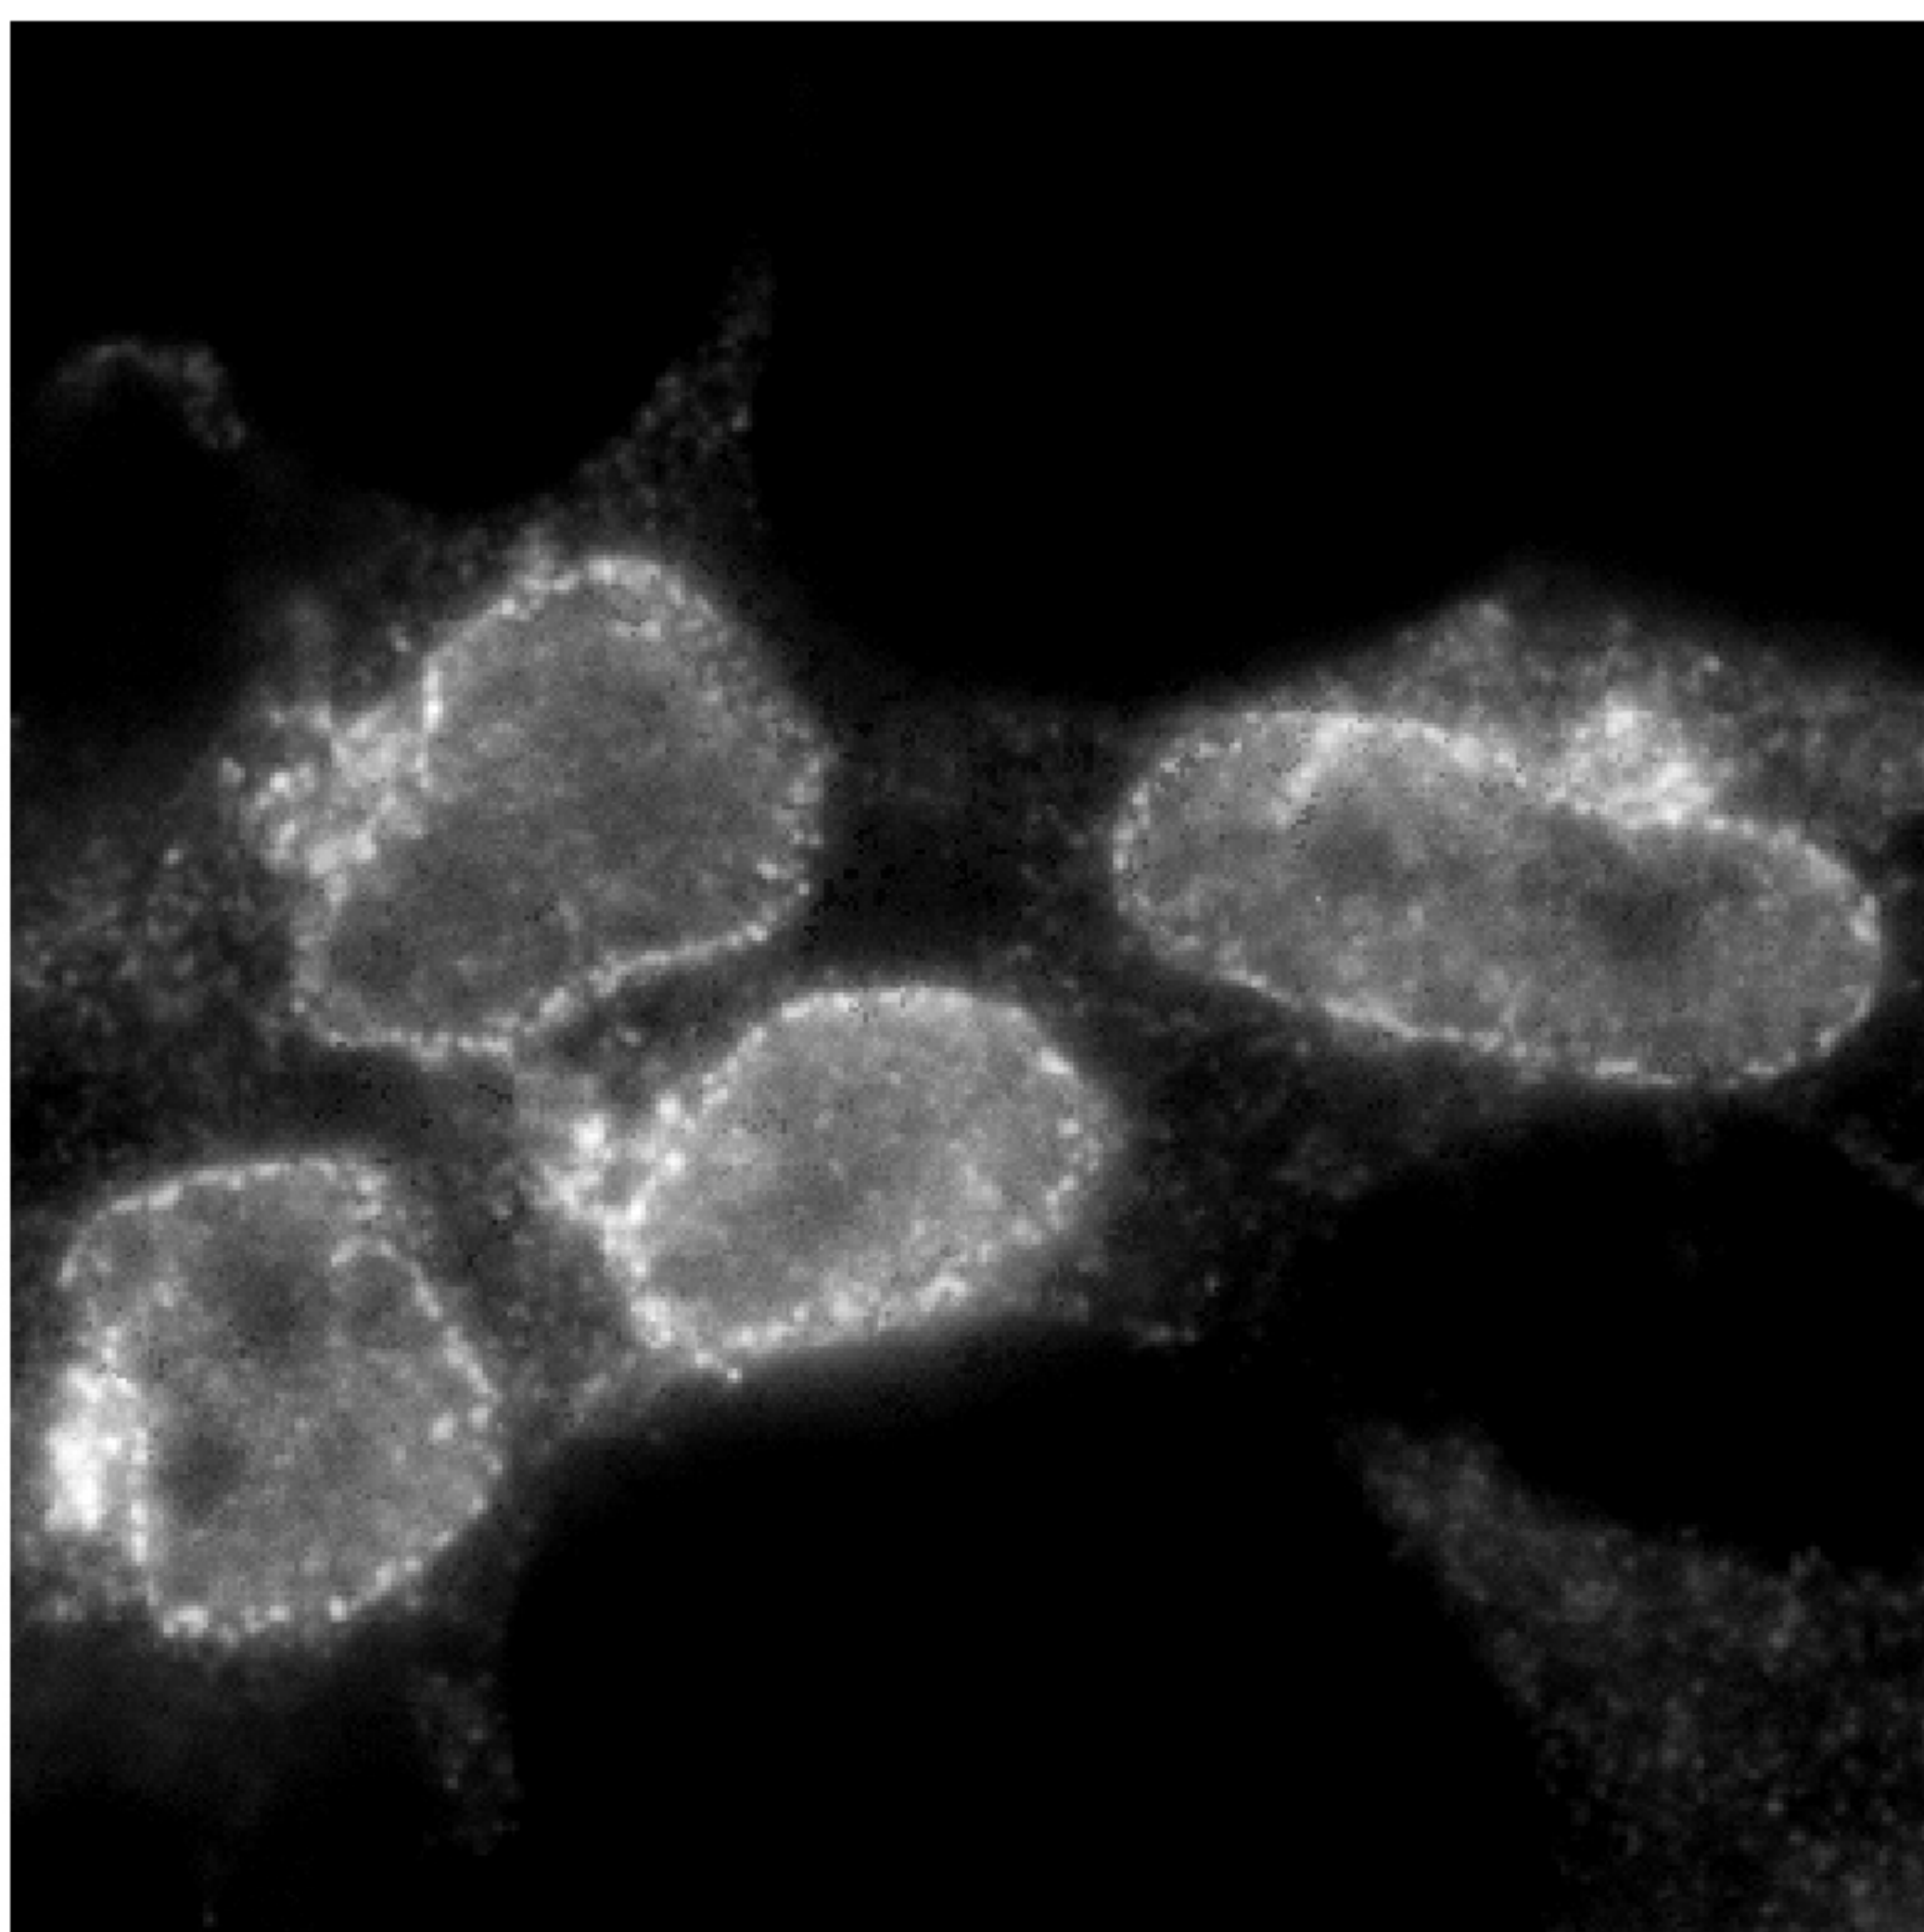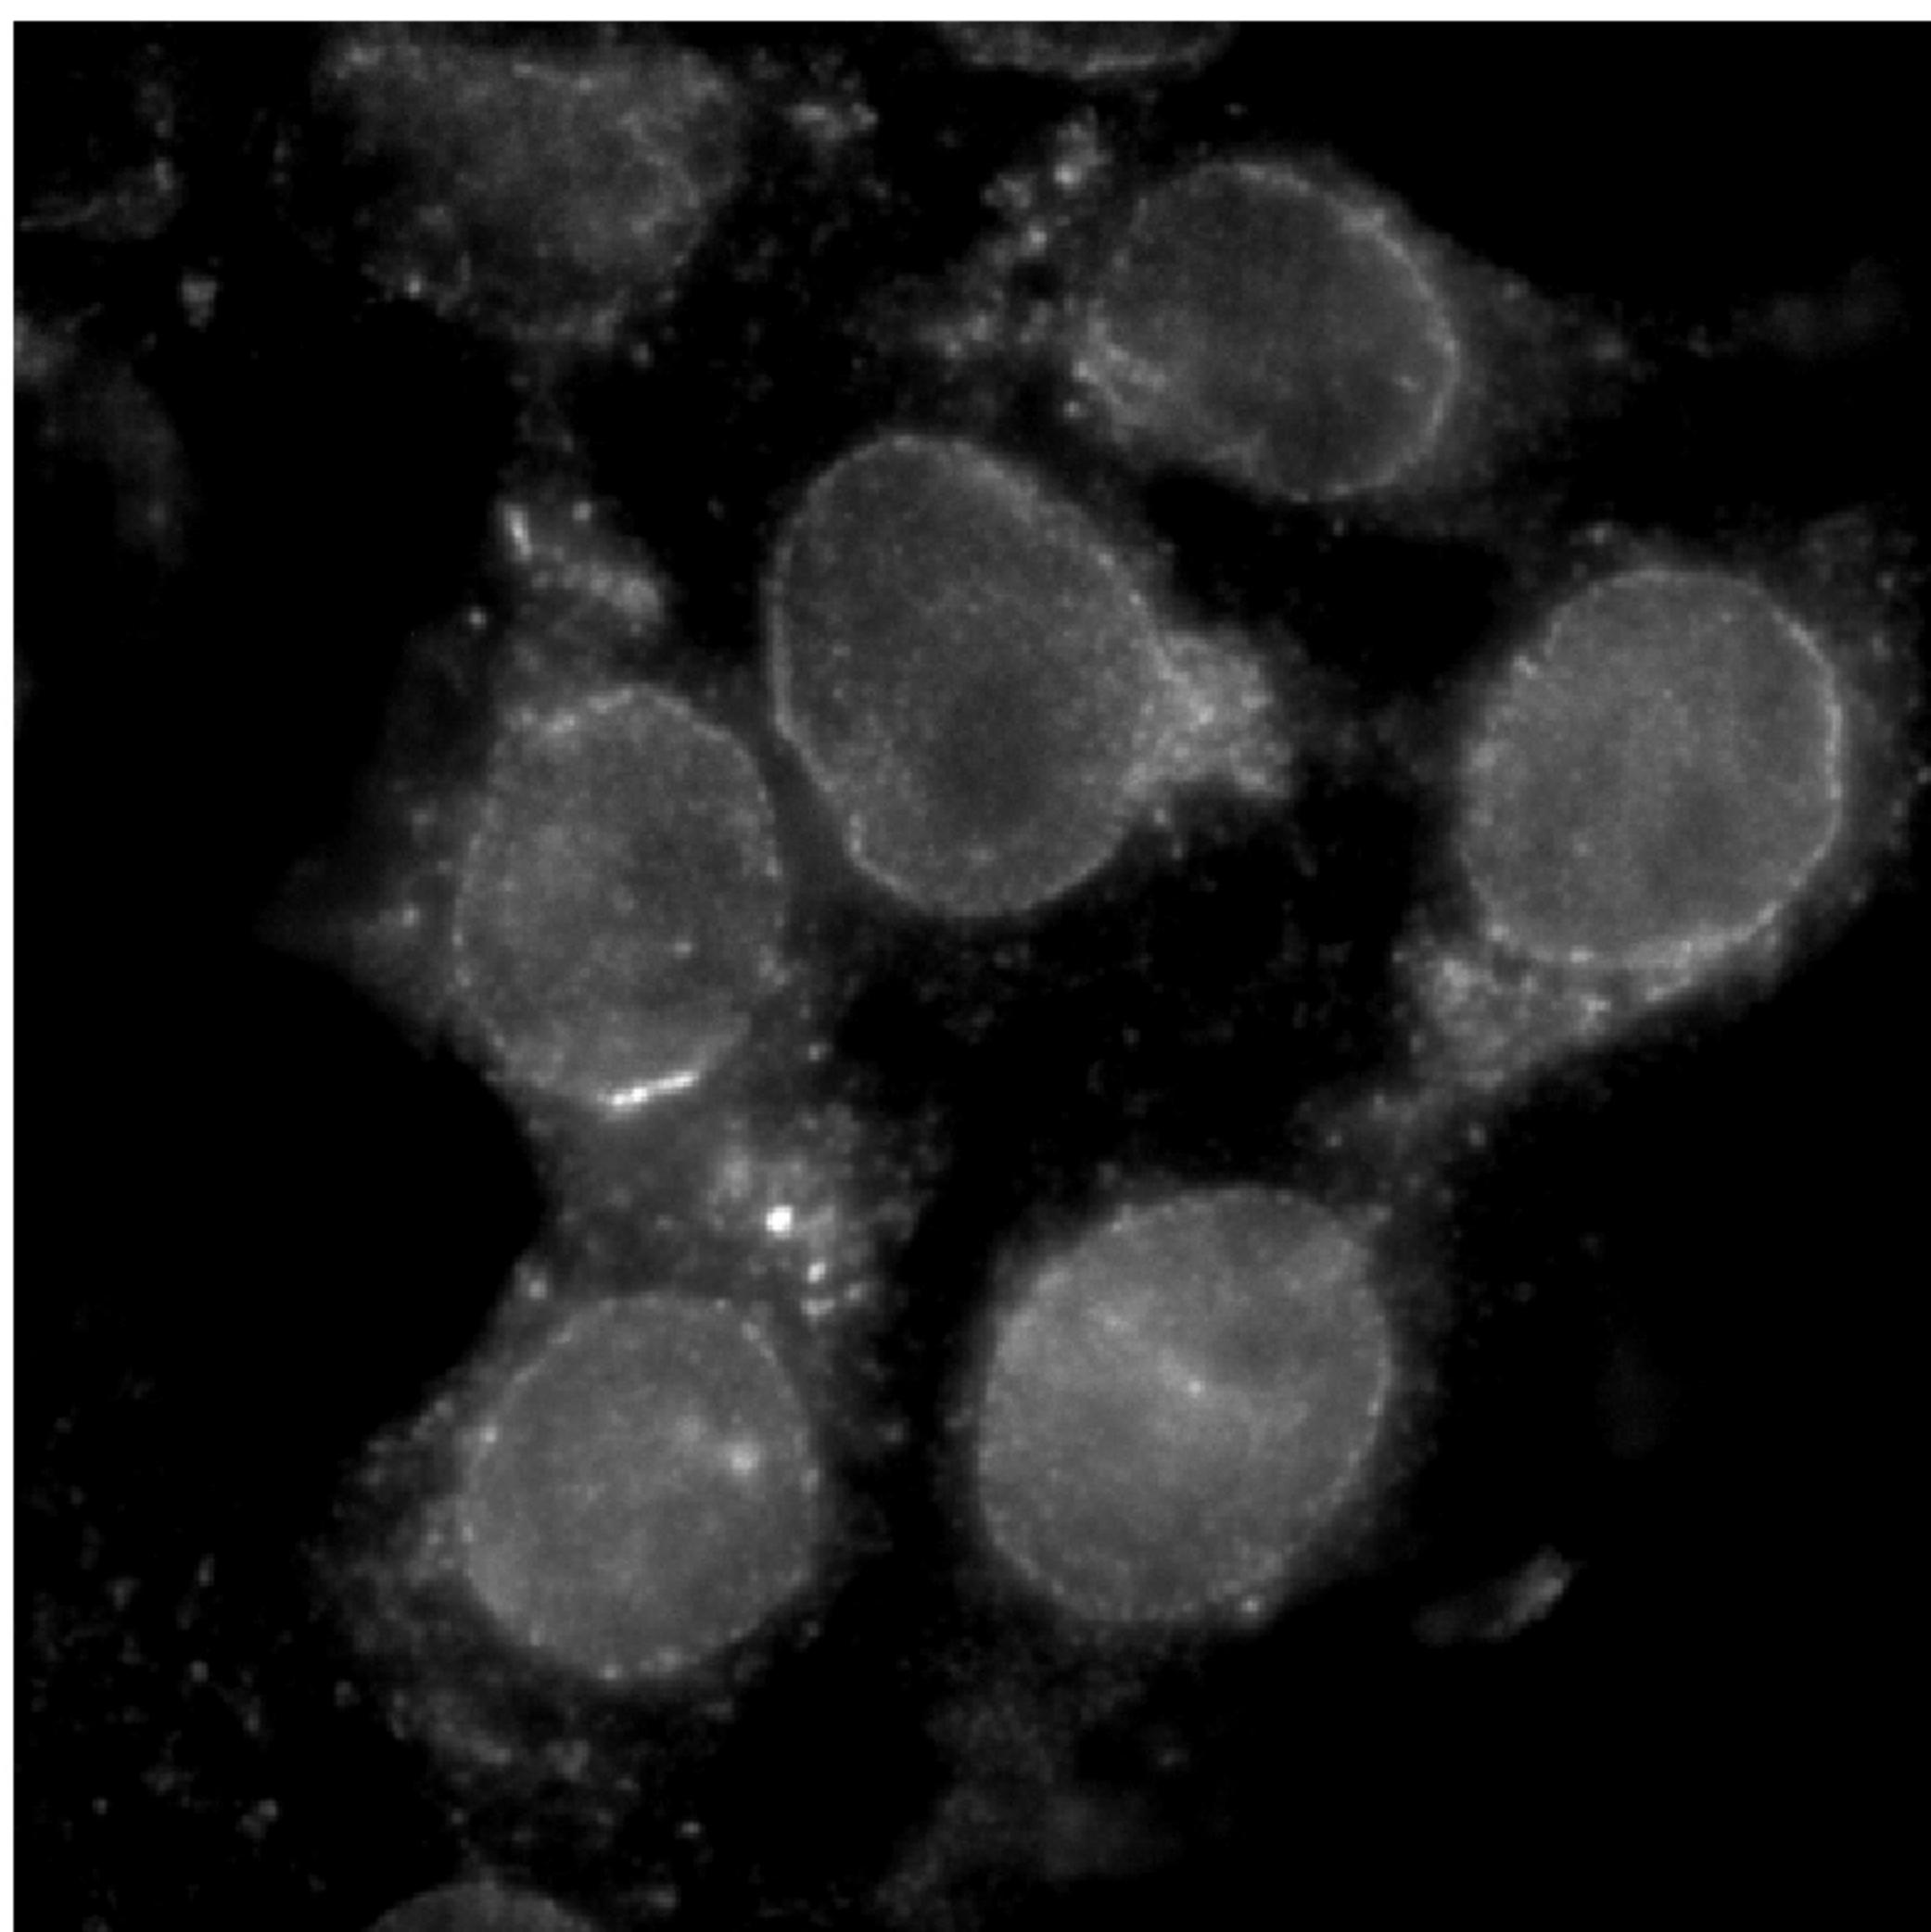

DAPI

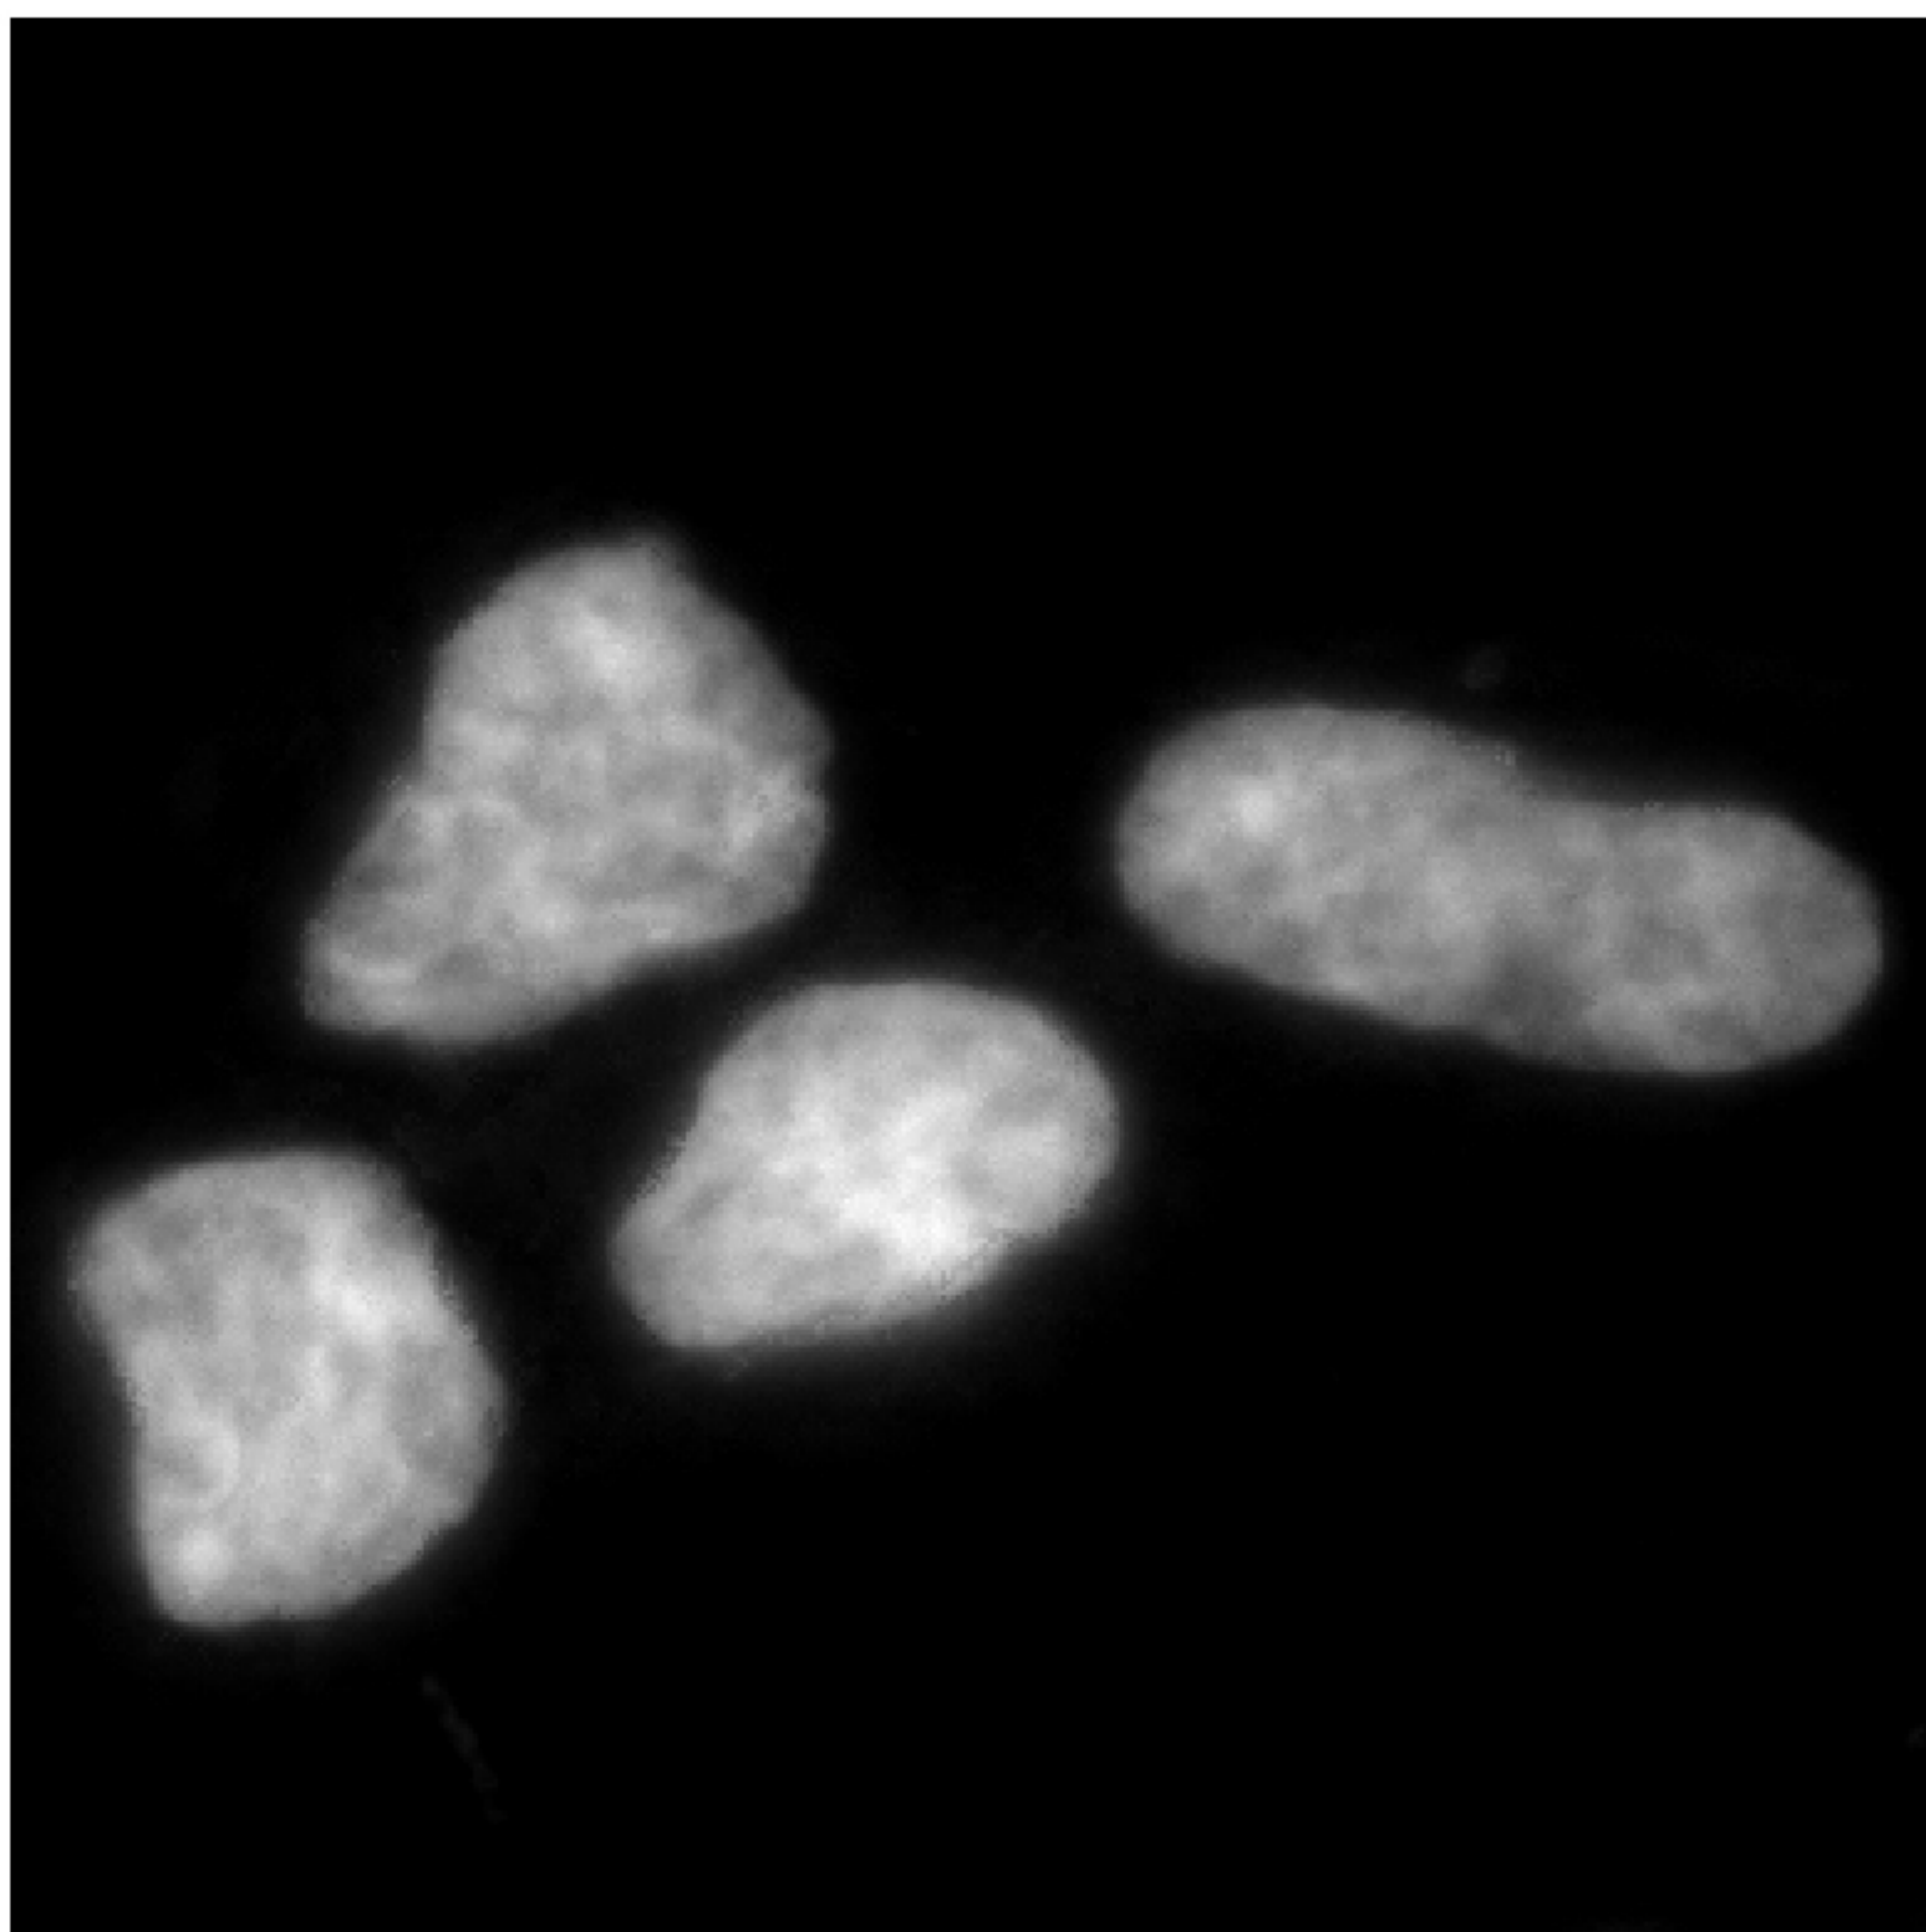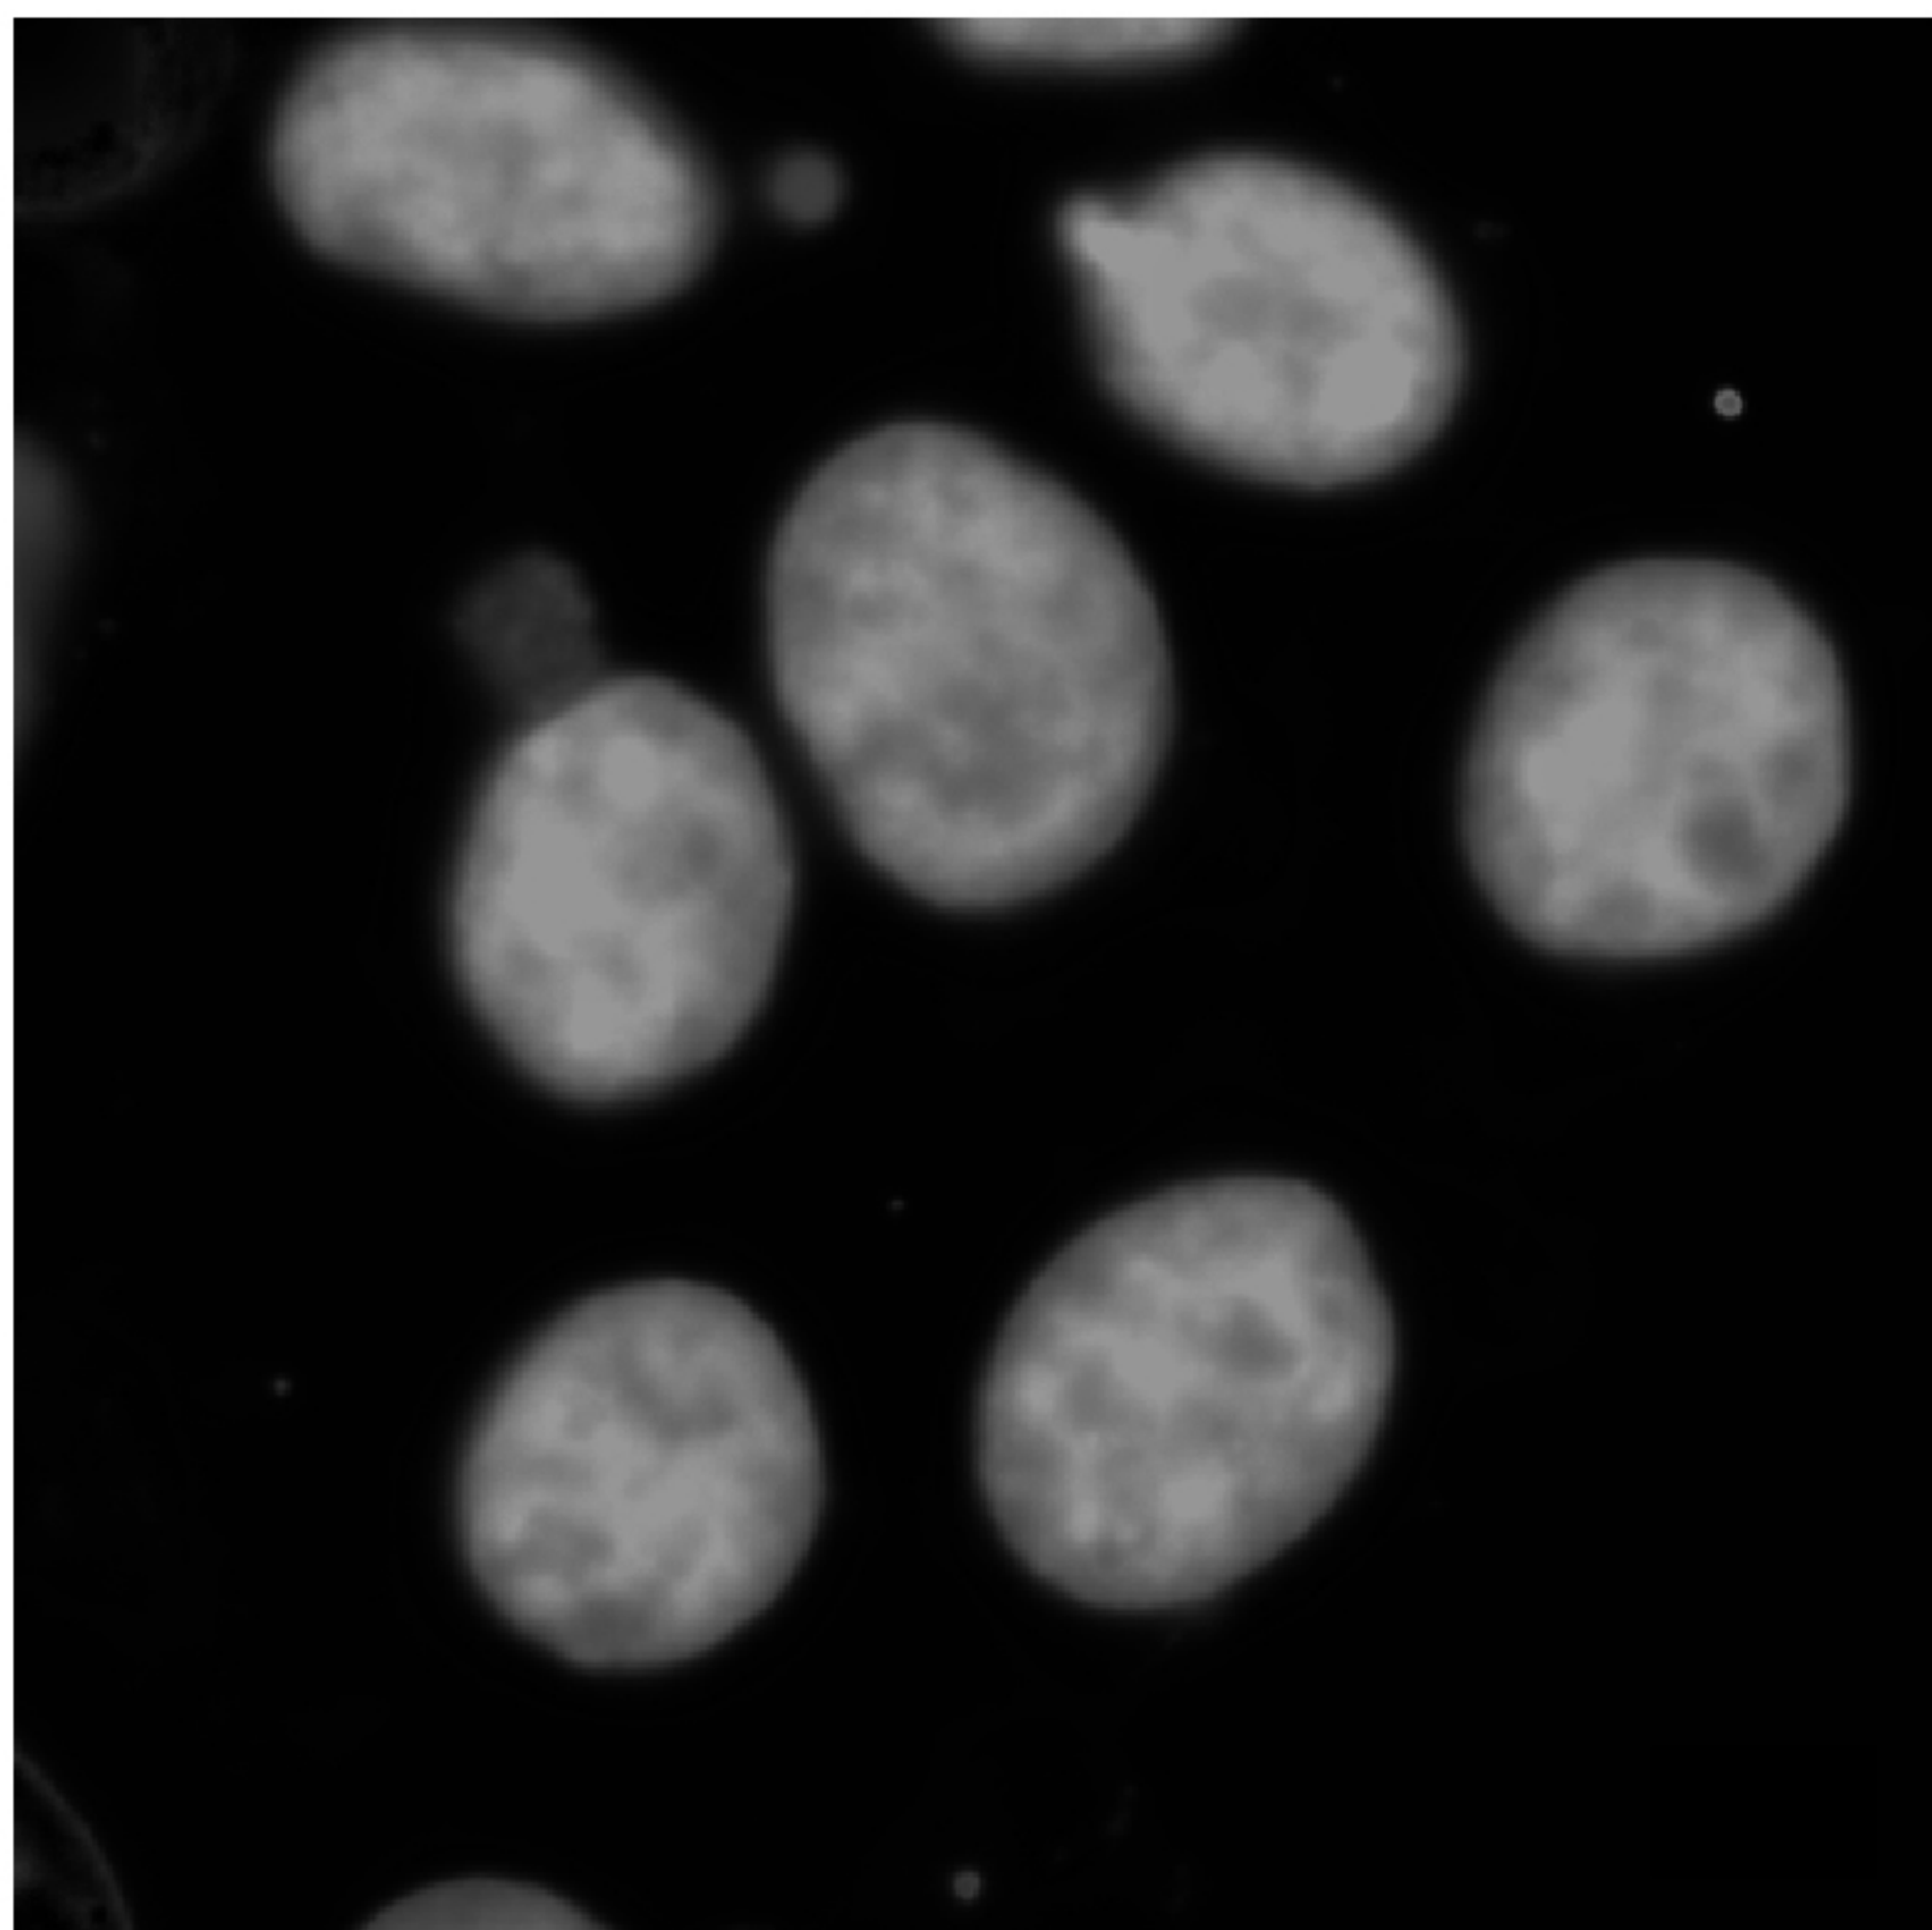

Merge

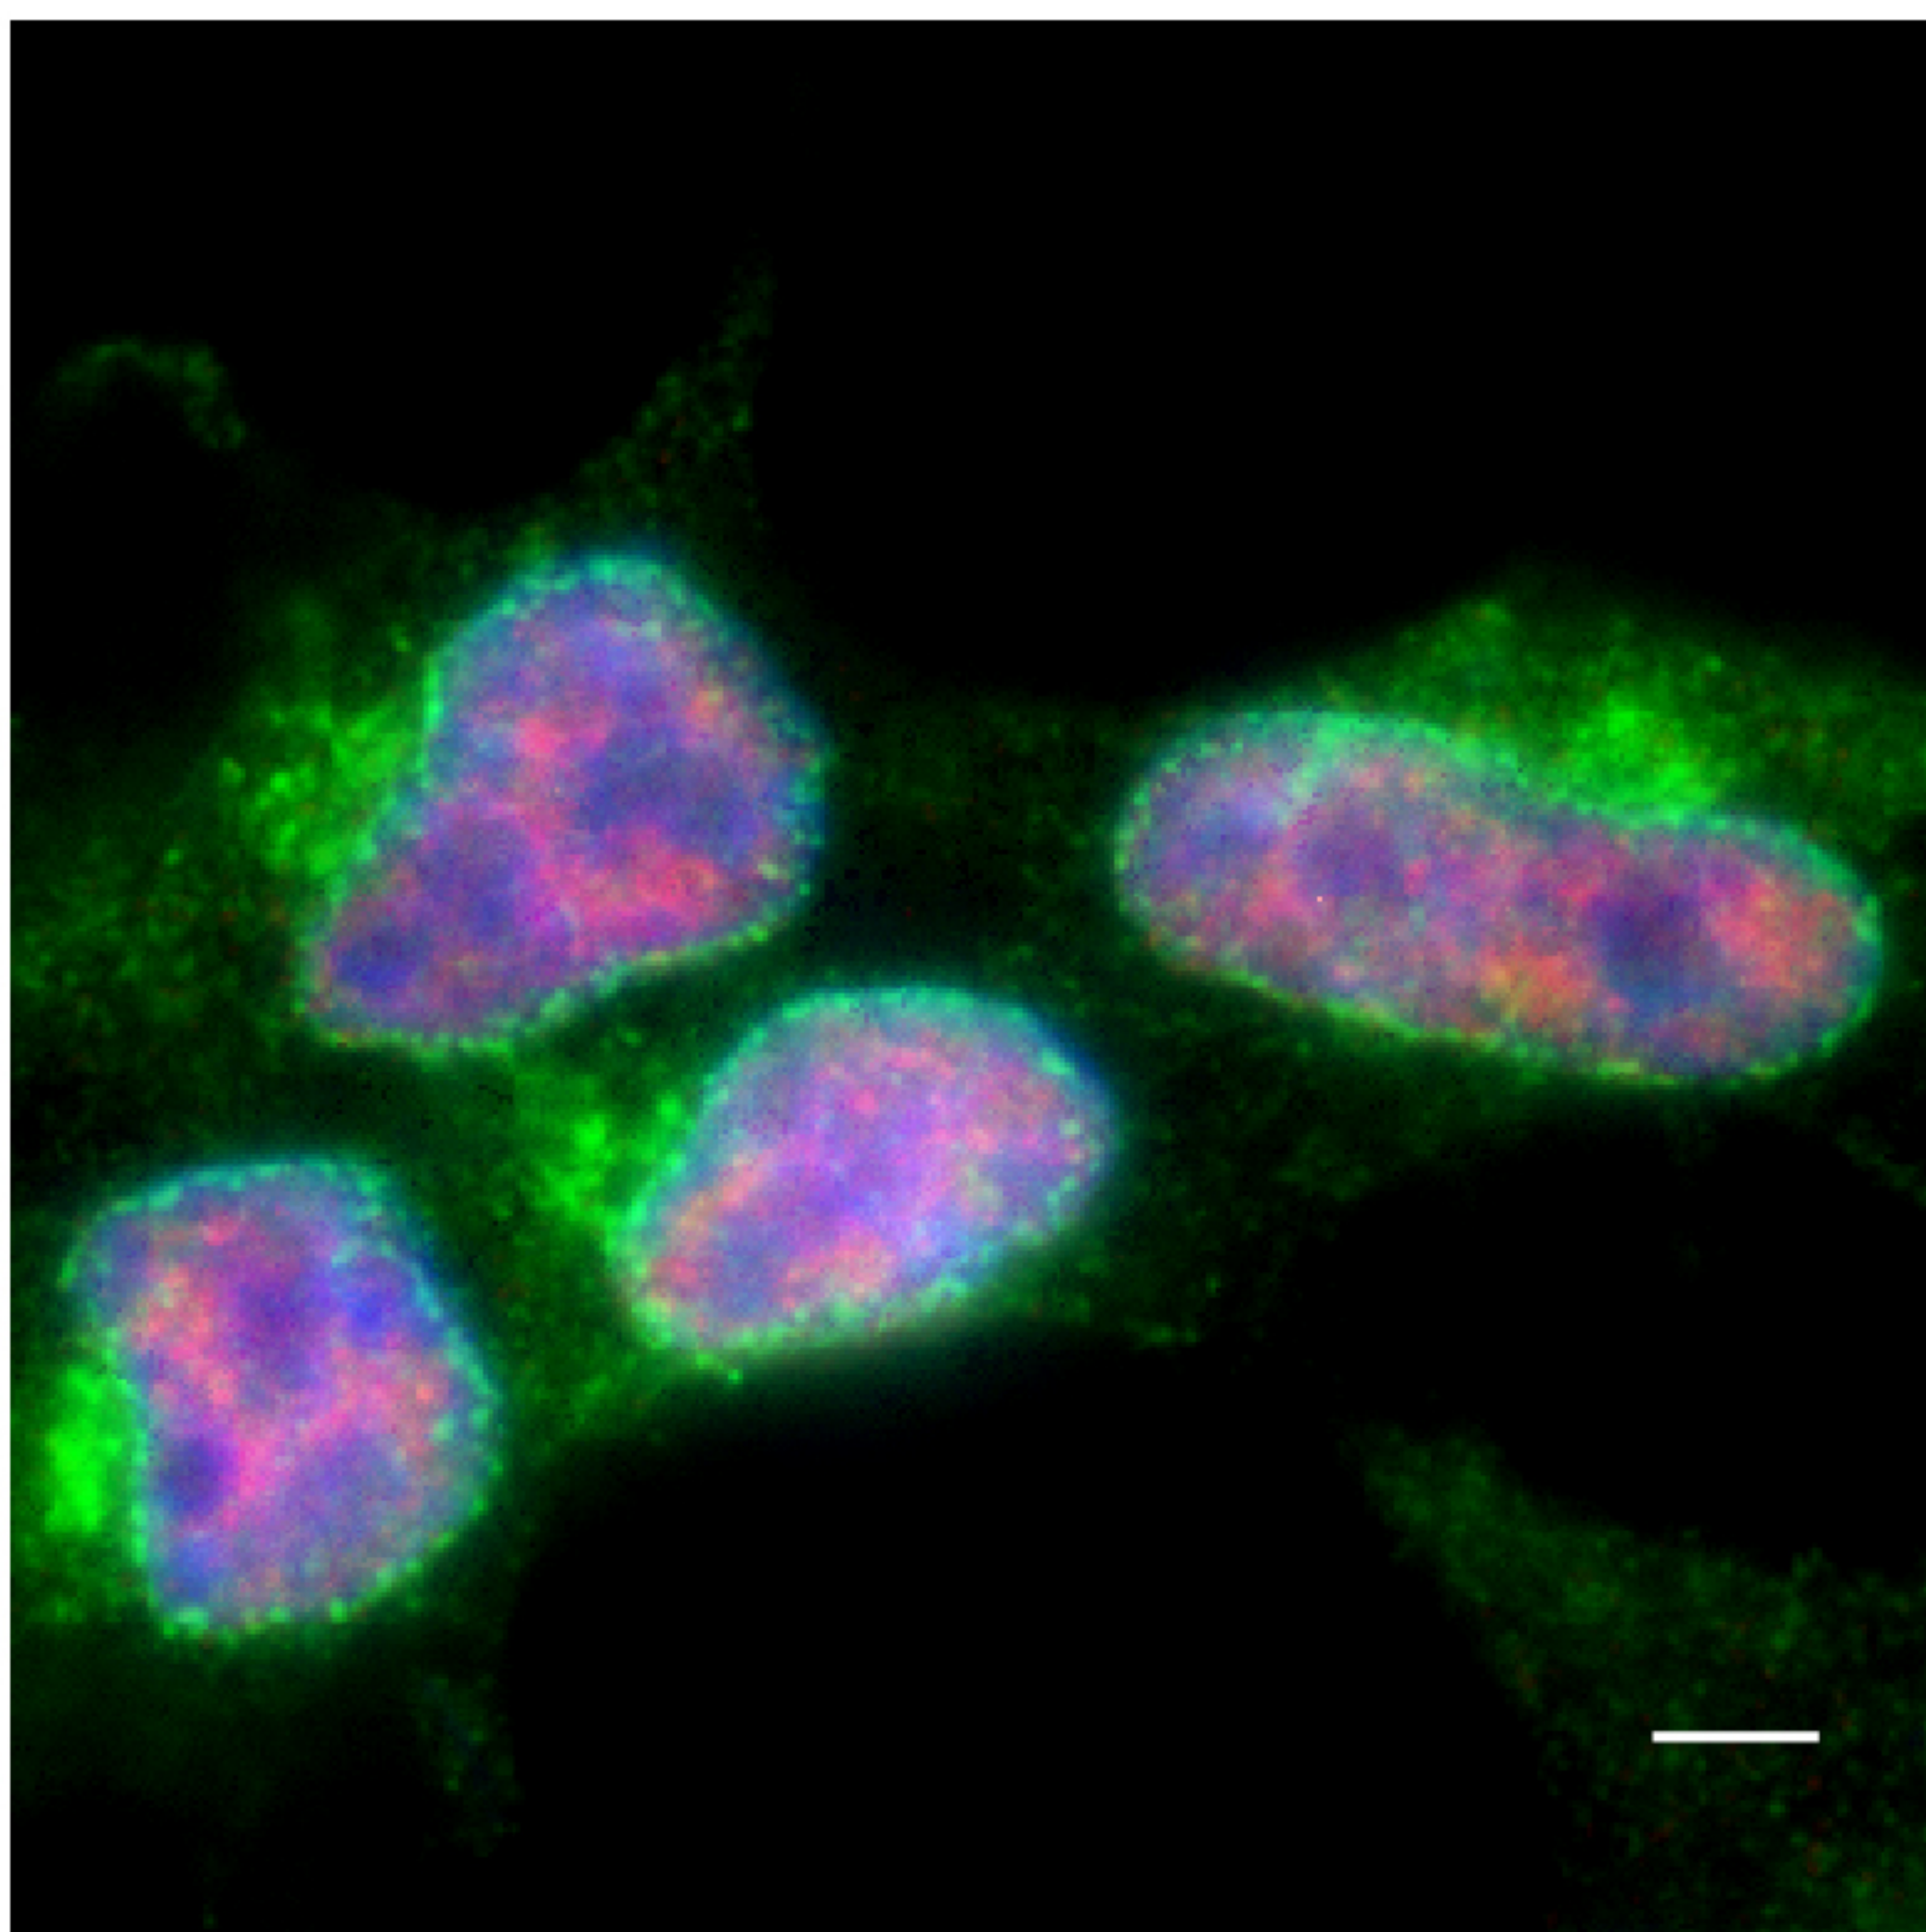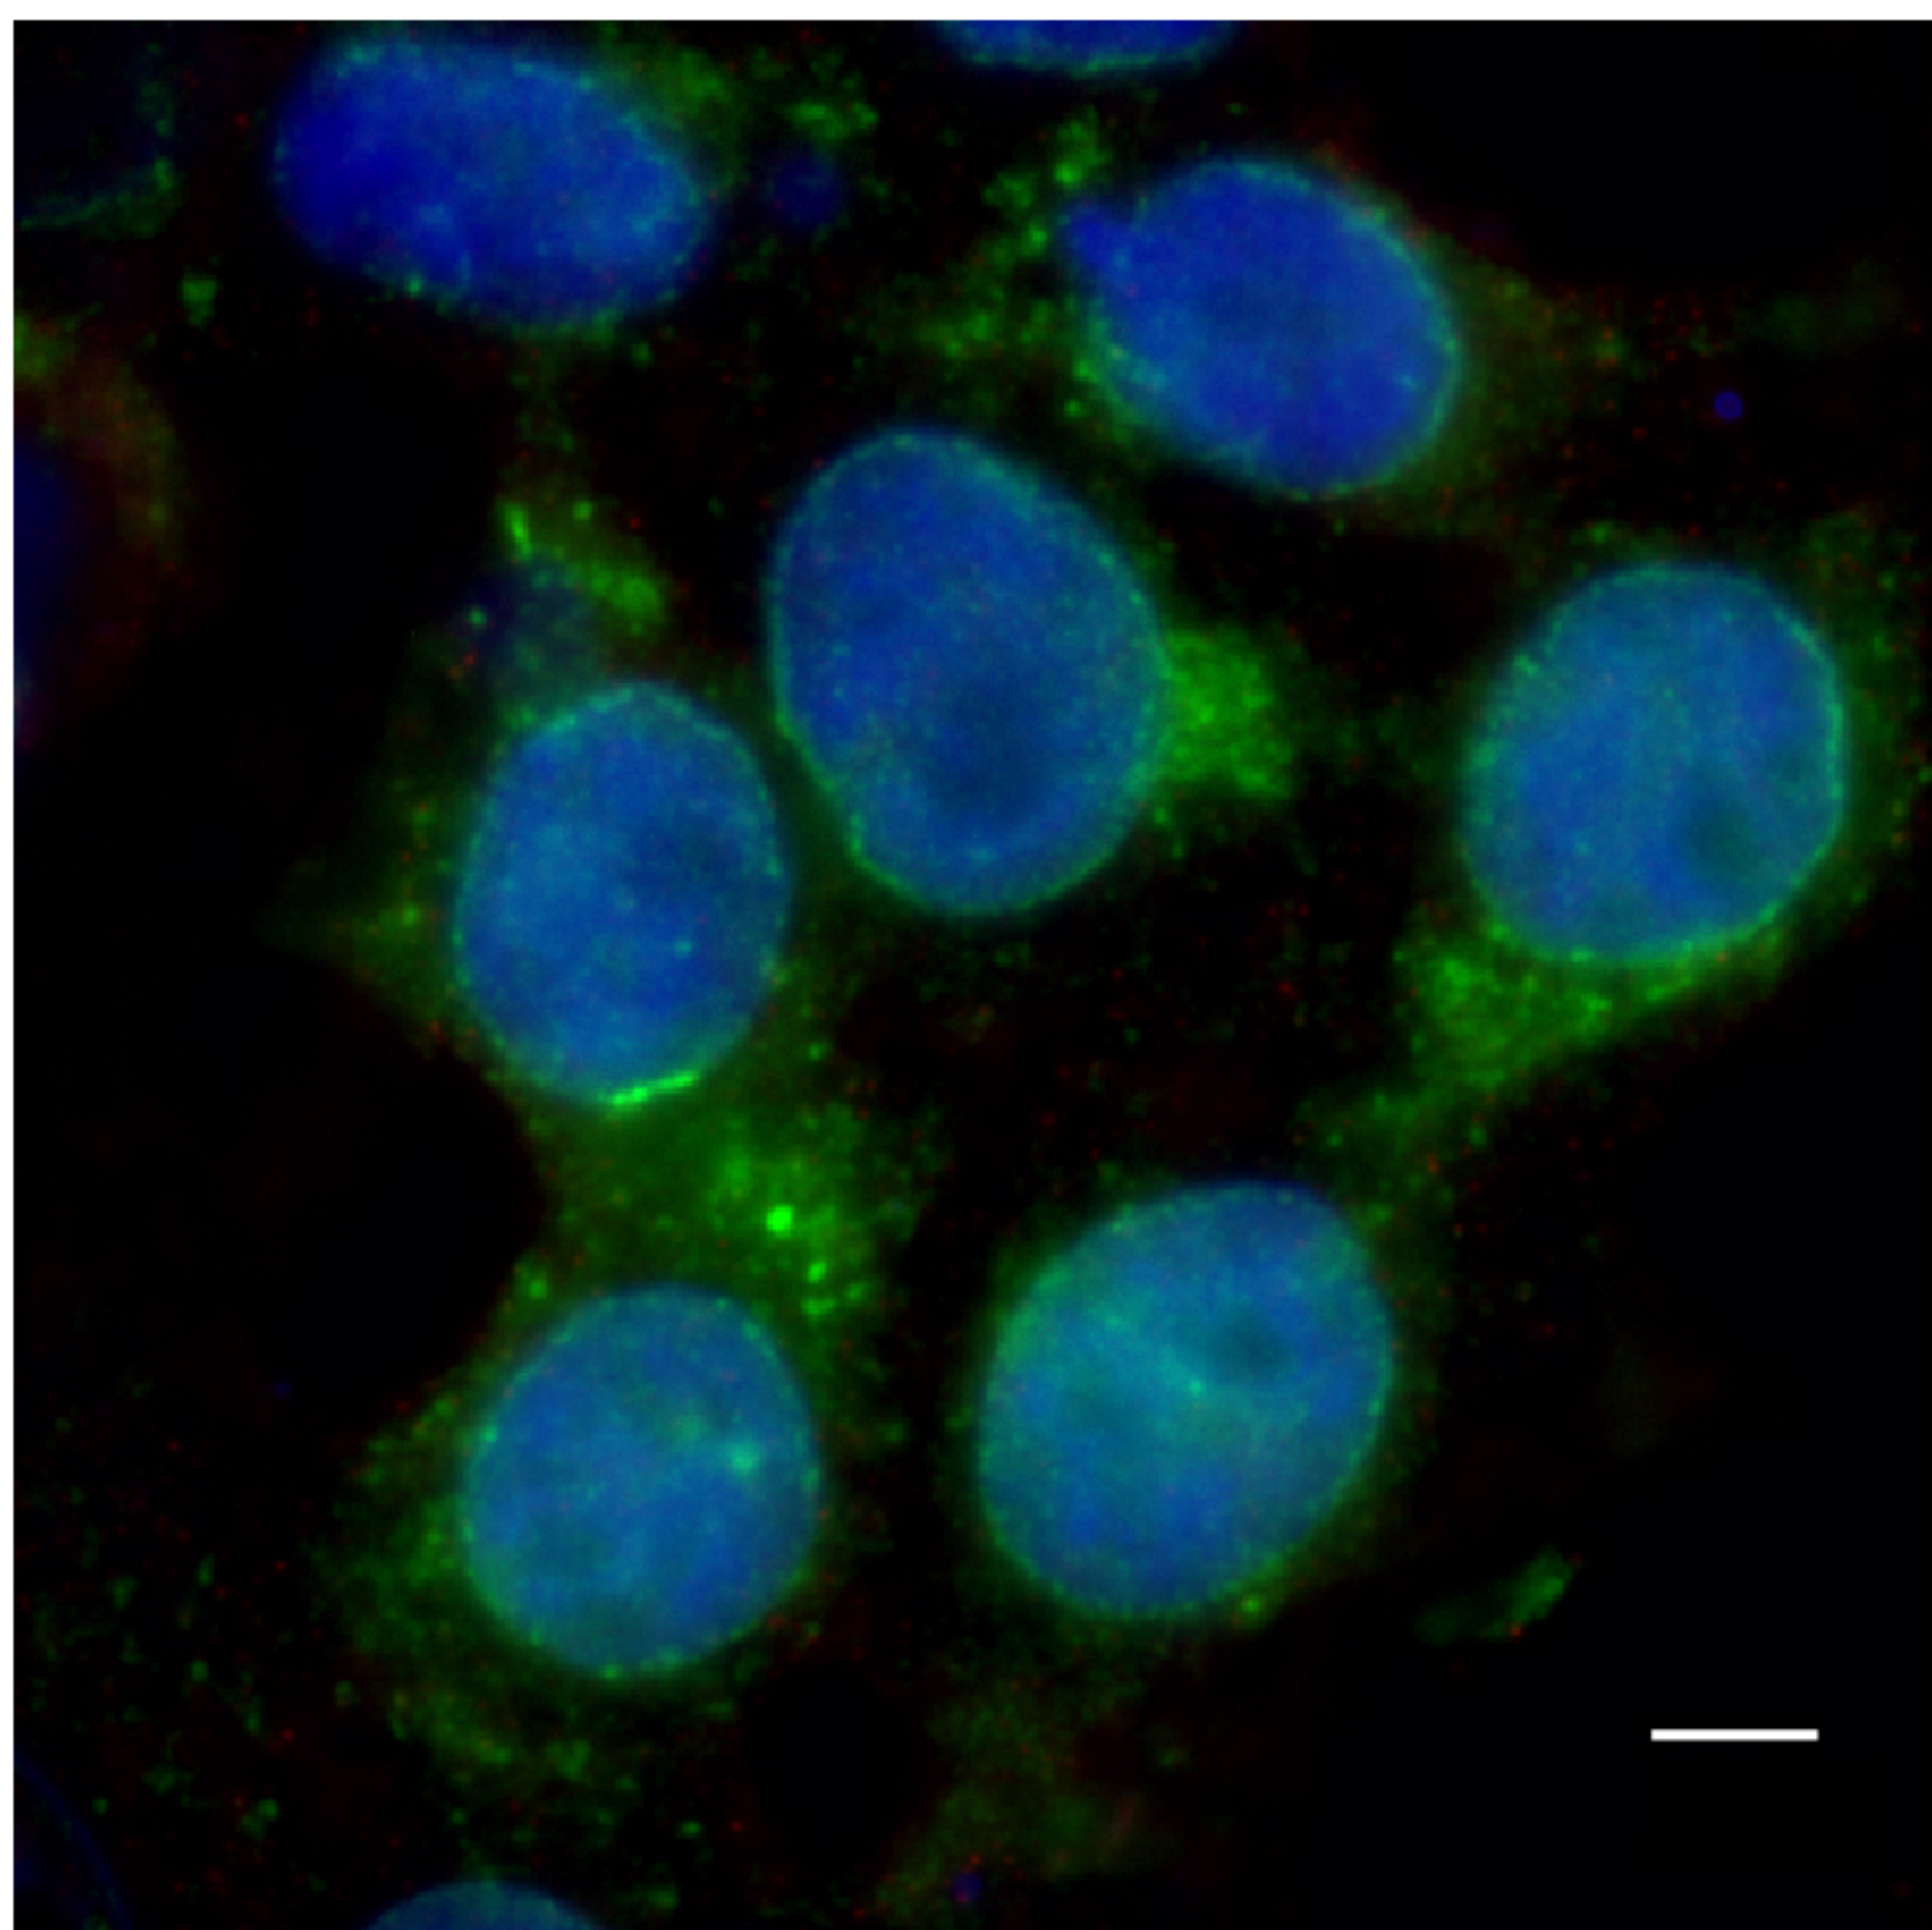

Supplement: supp [file elife-18825-supp-v1.zip]

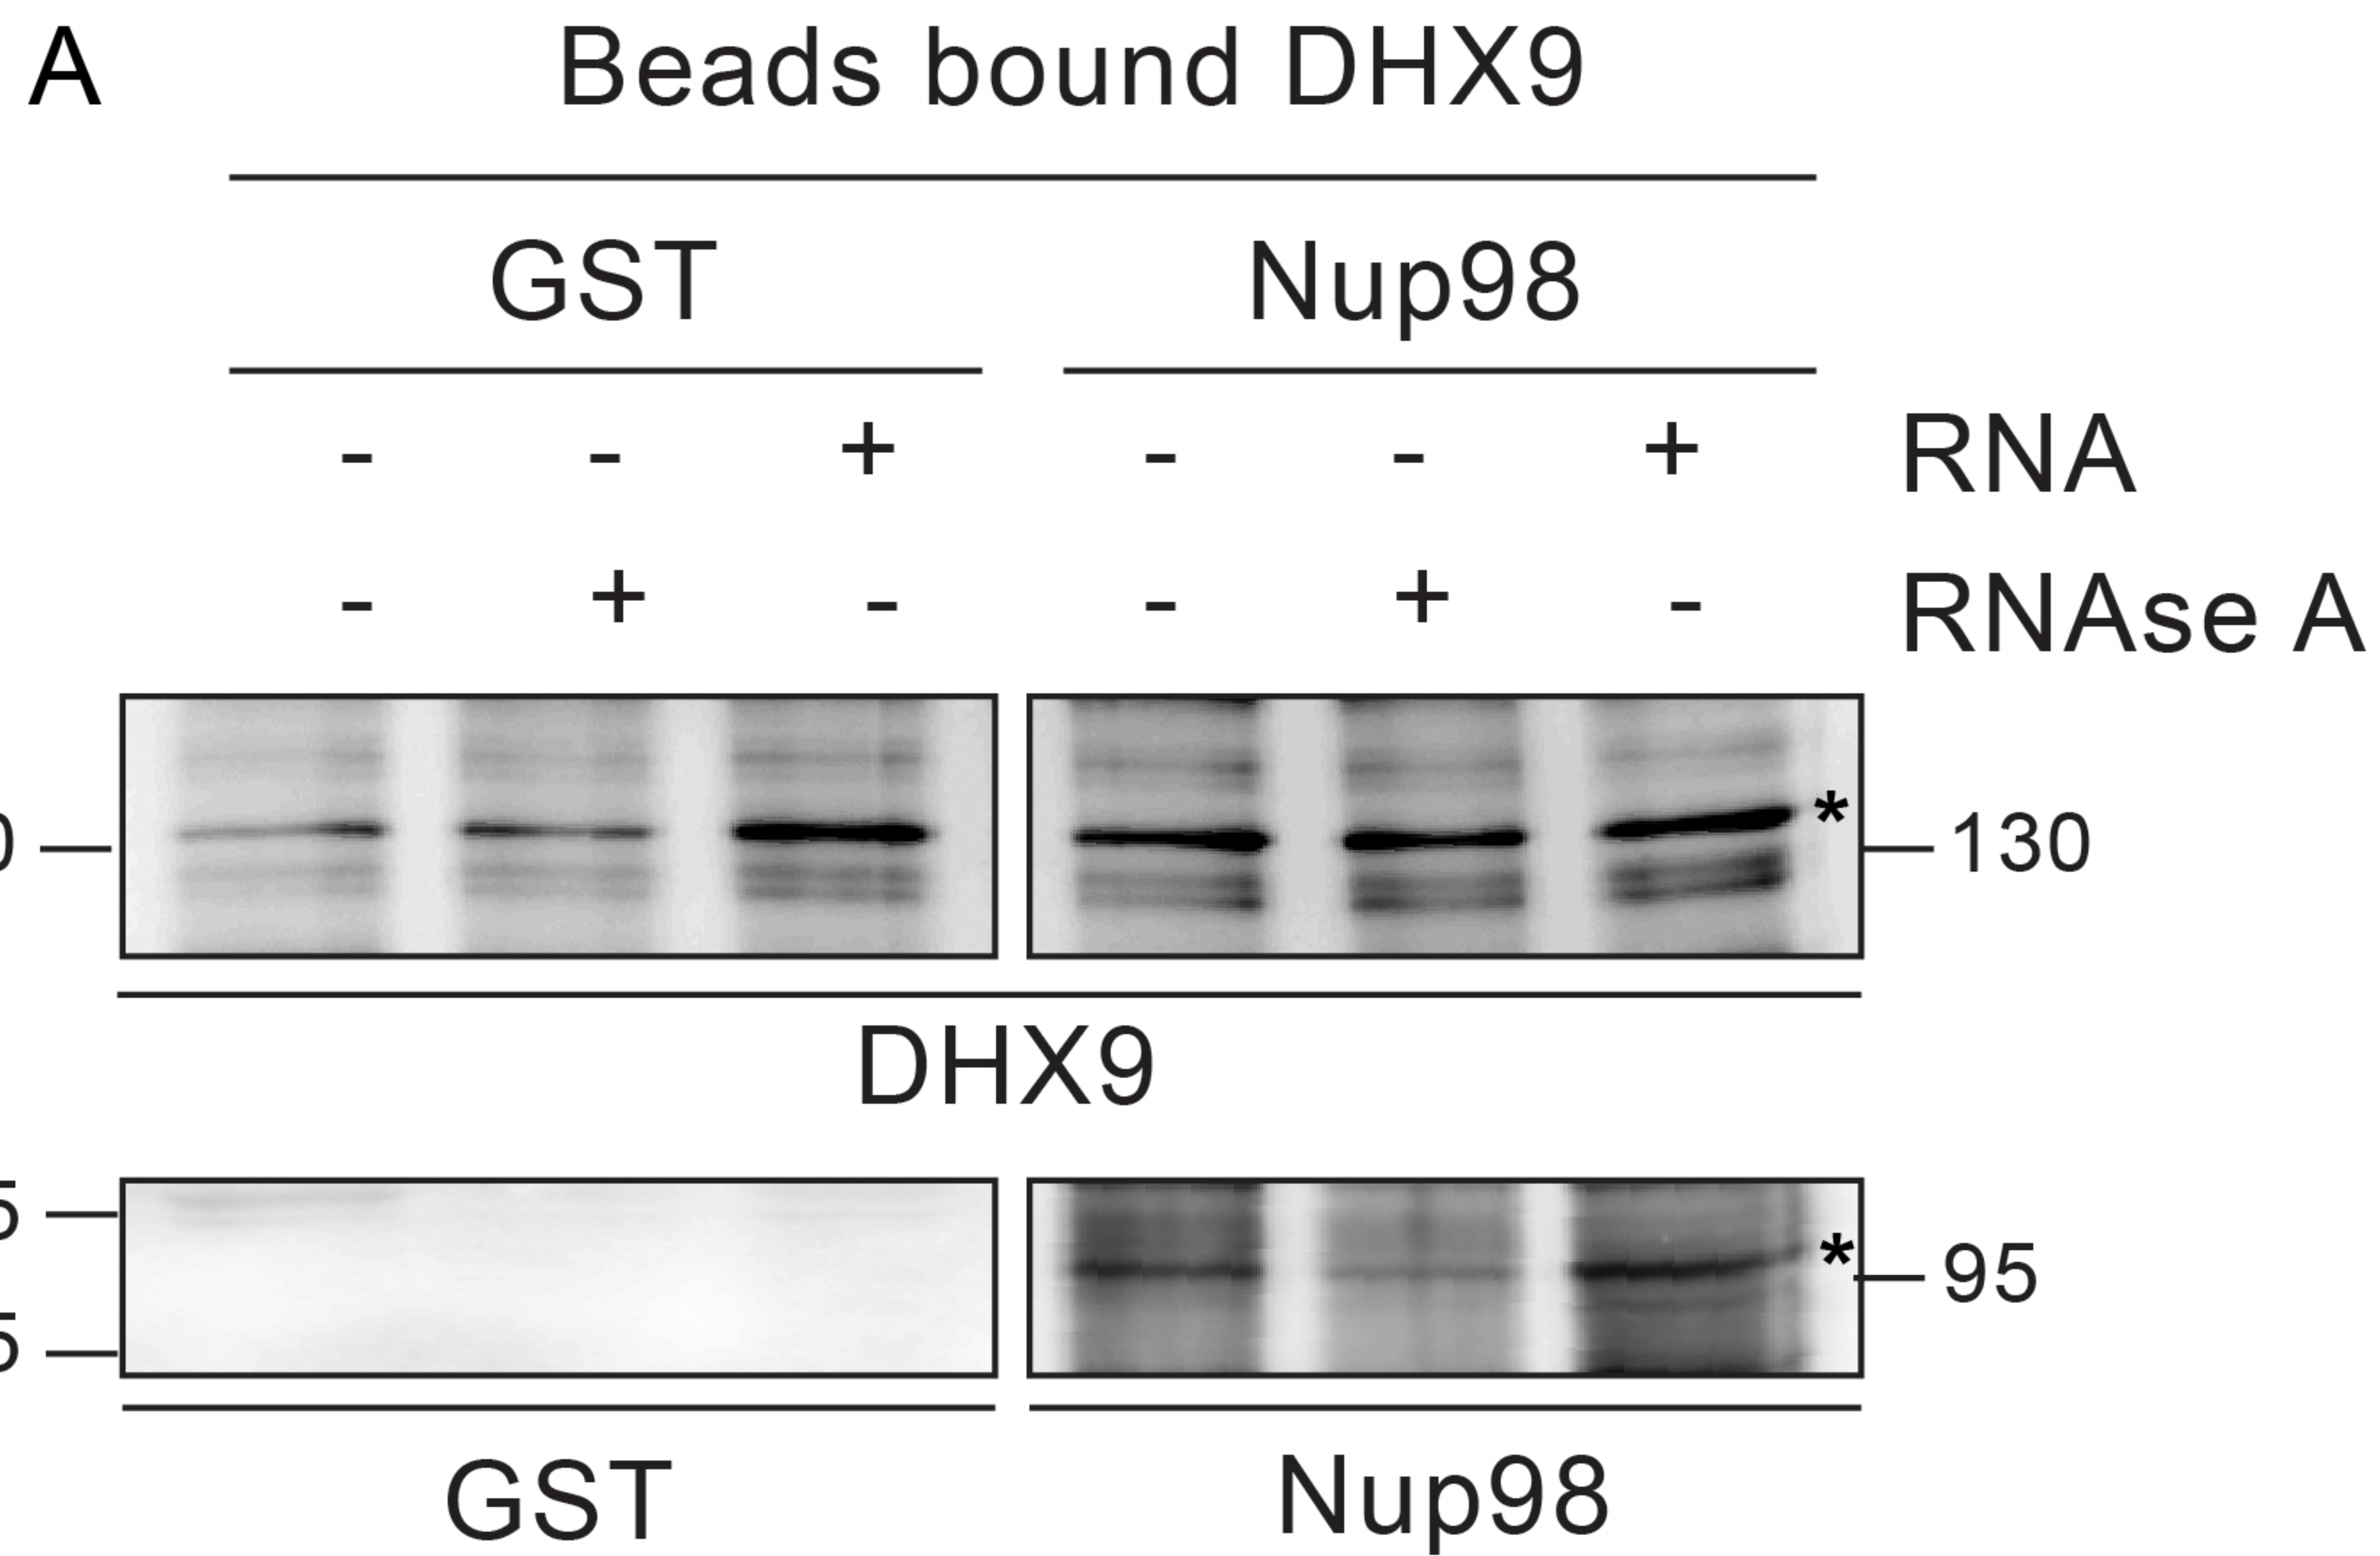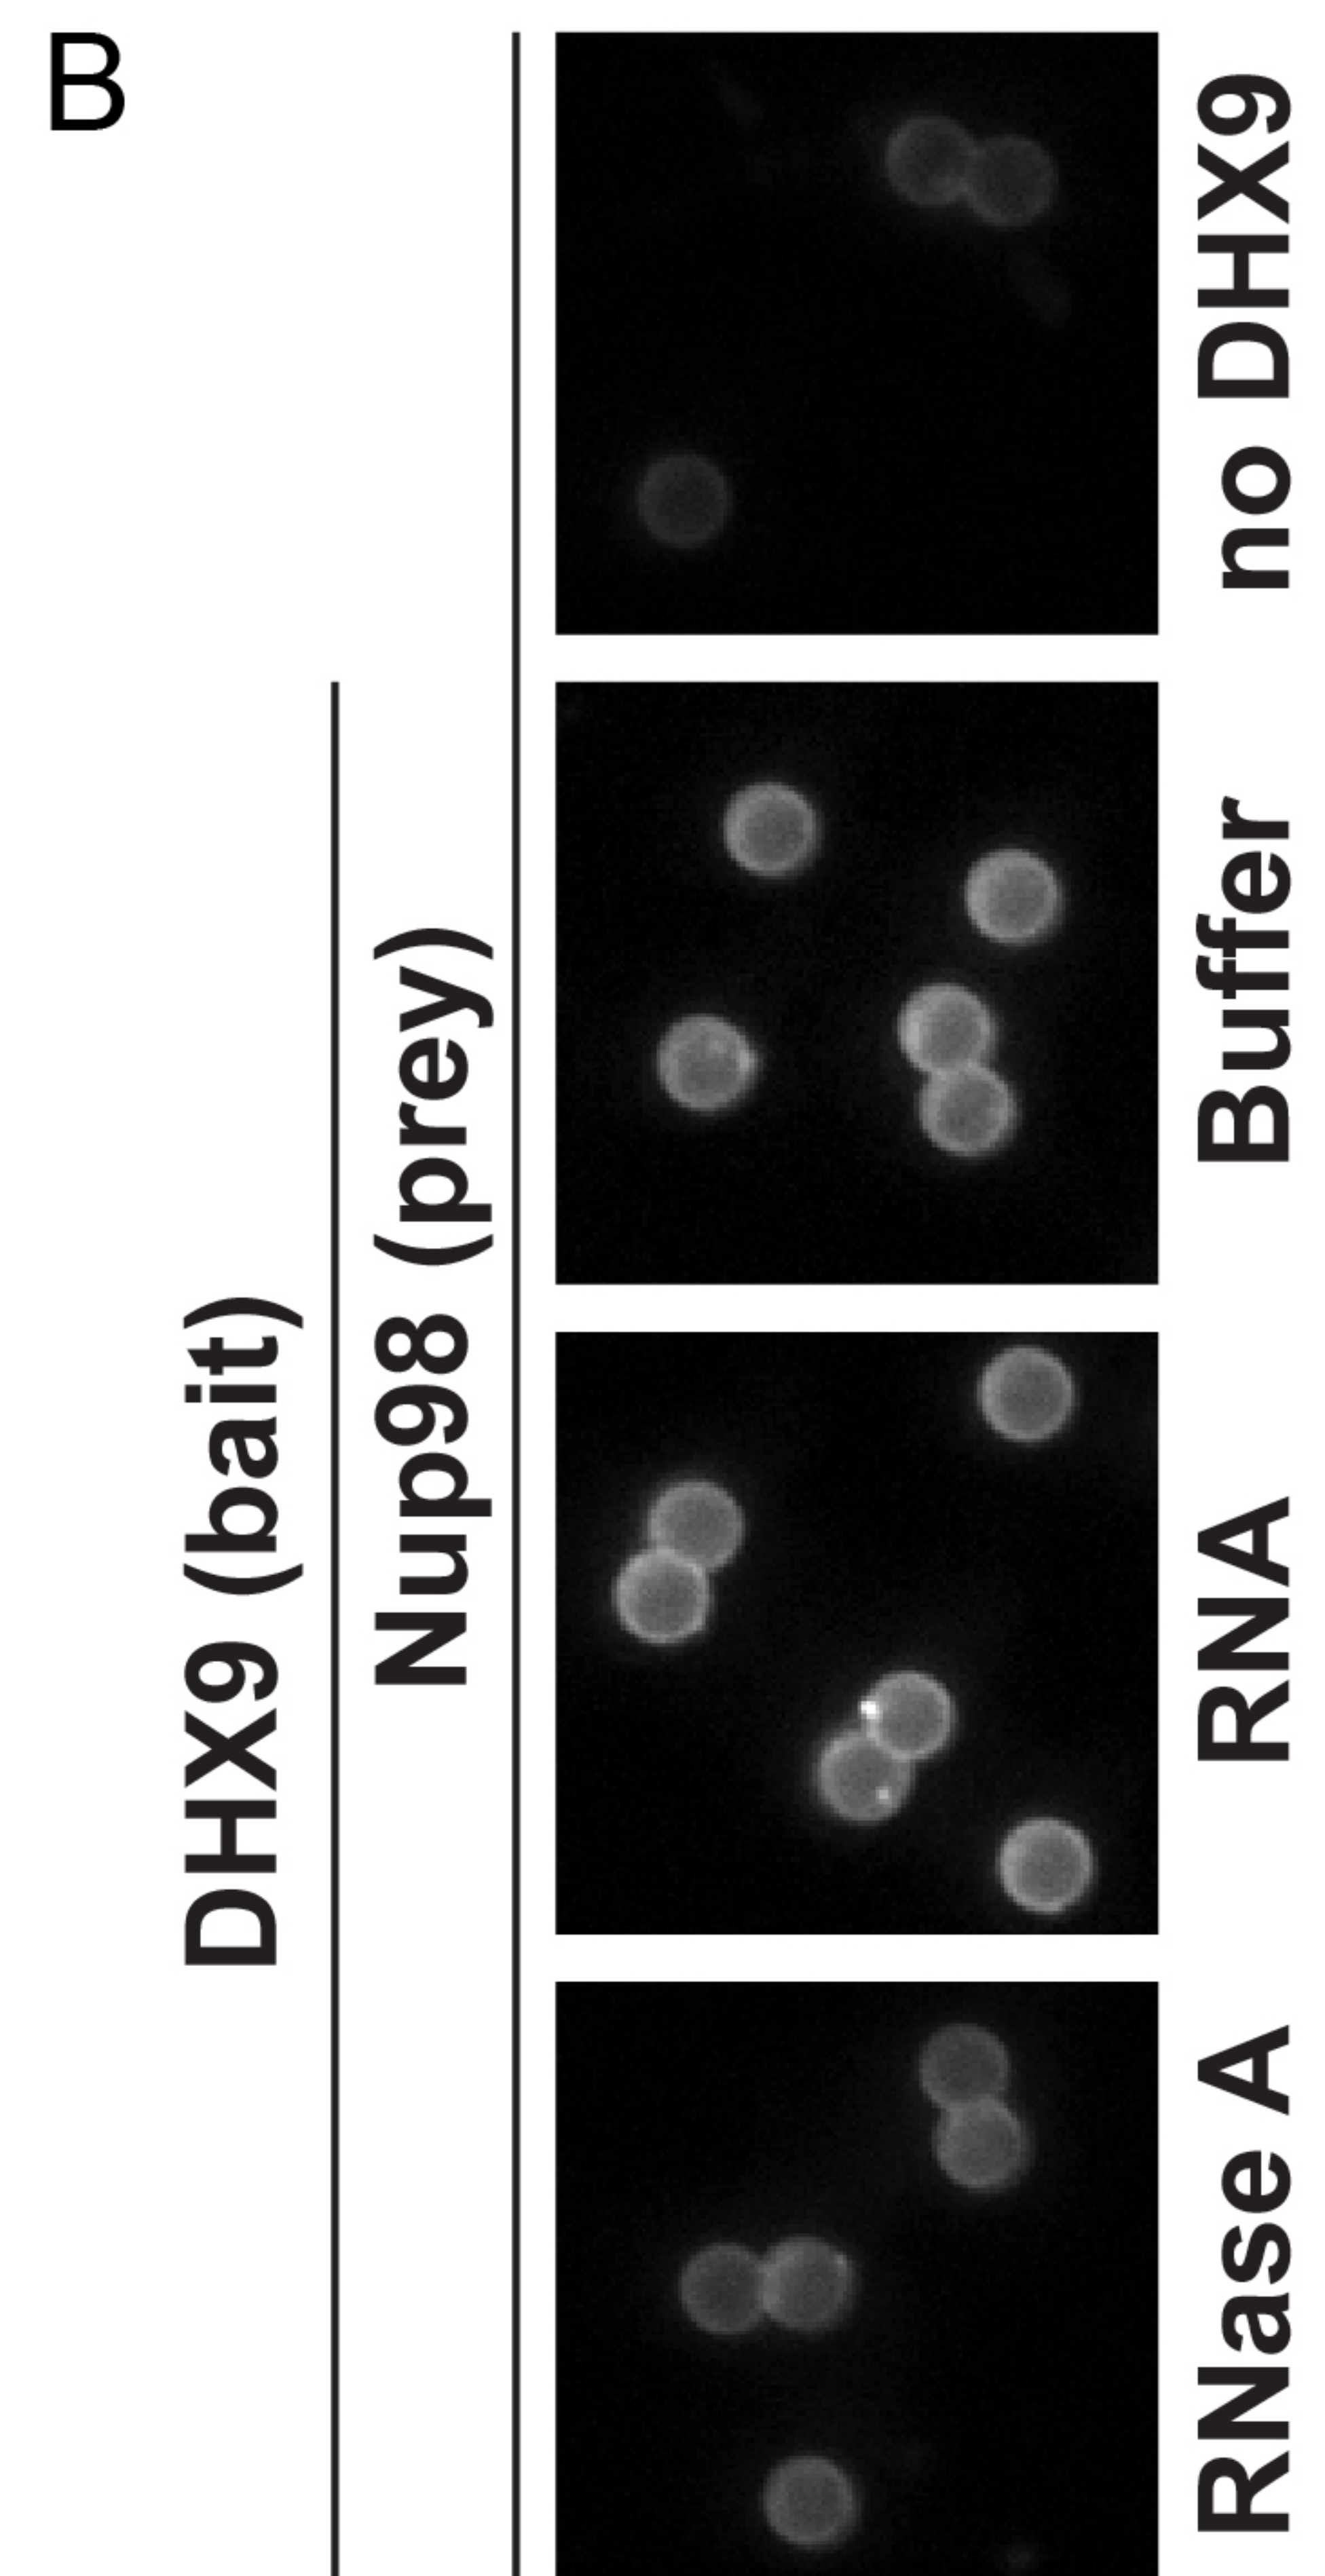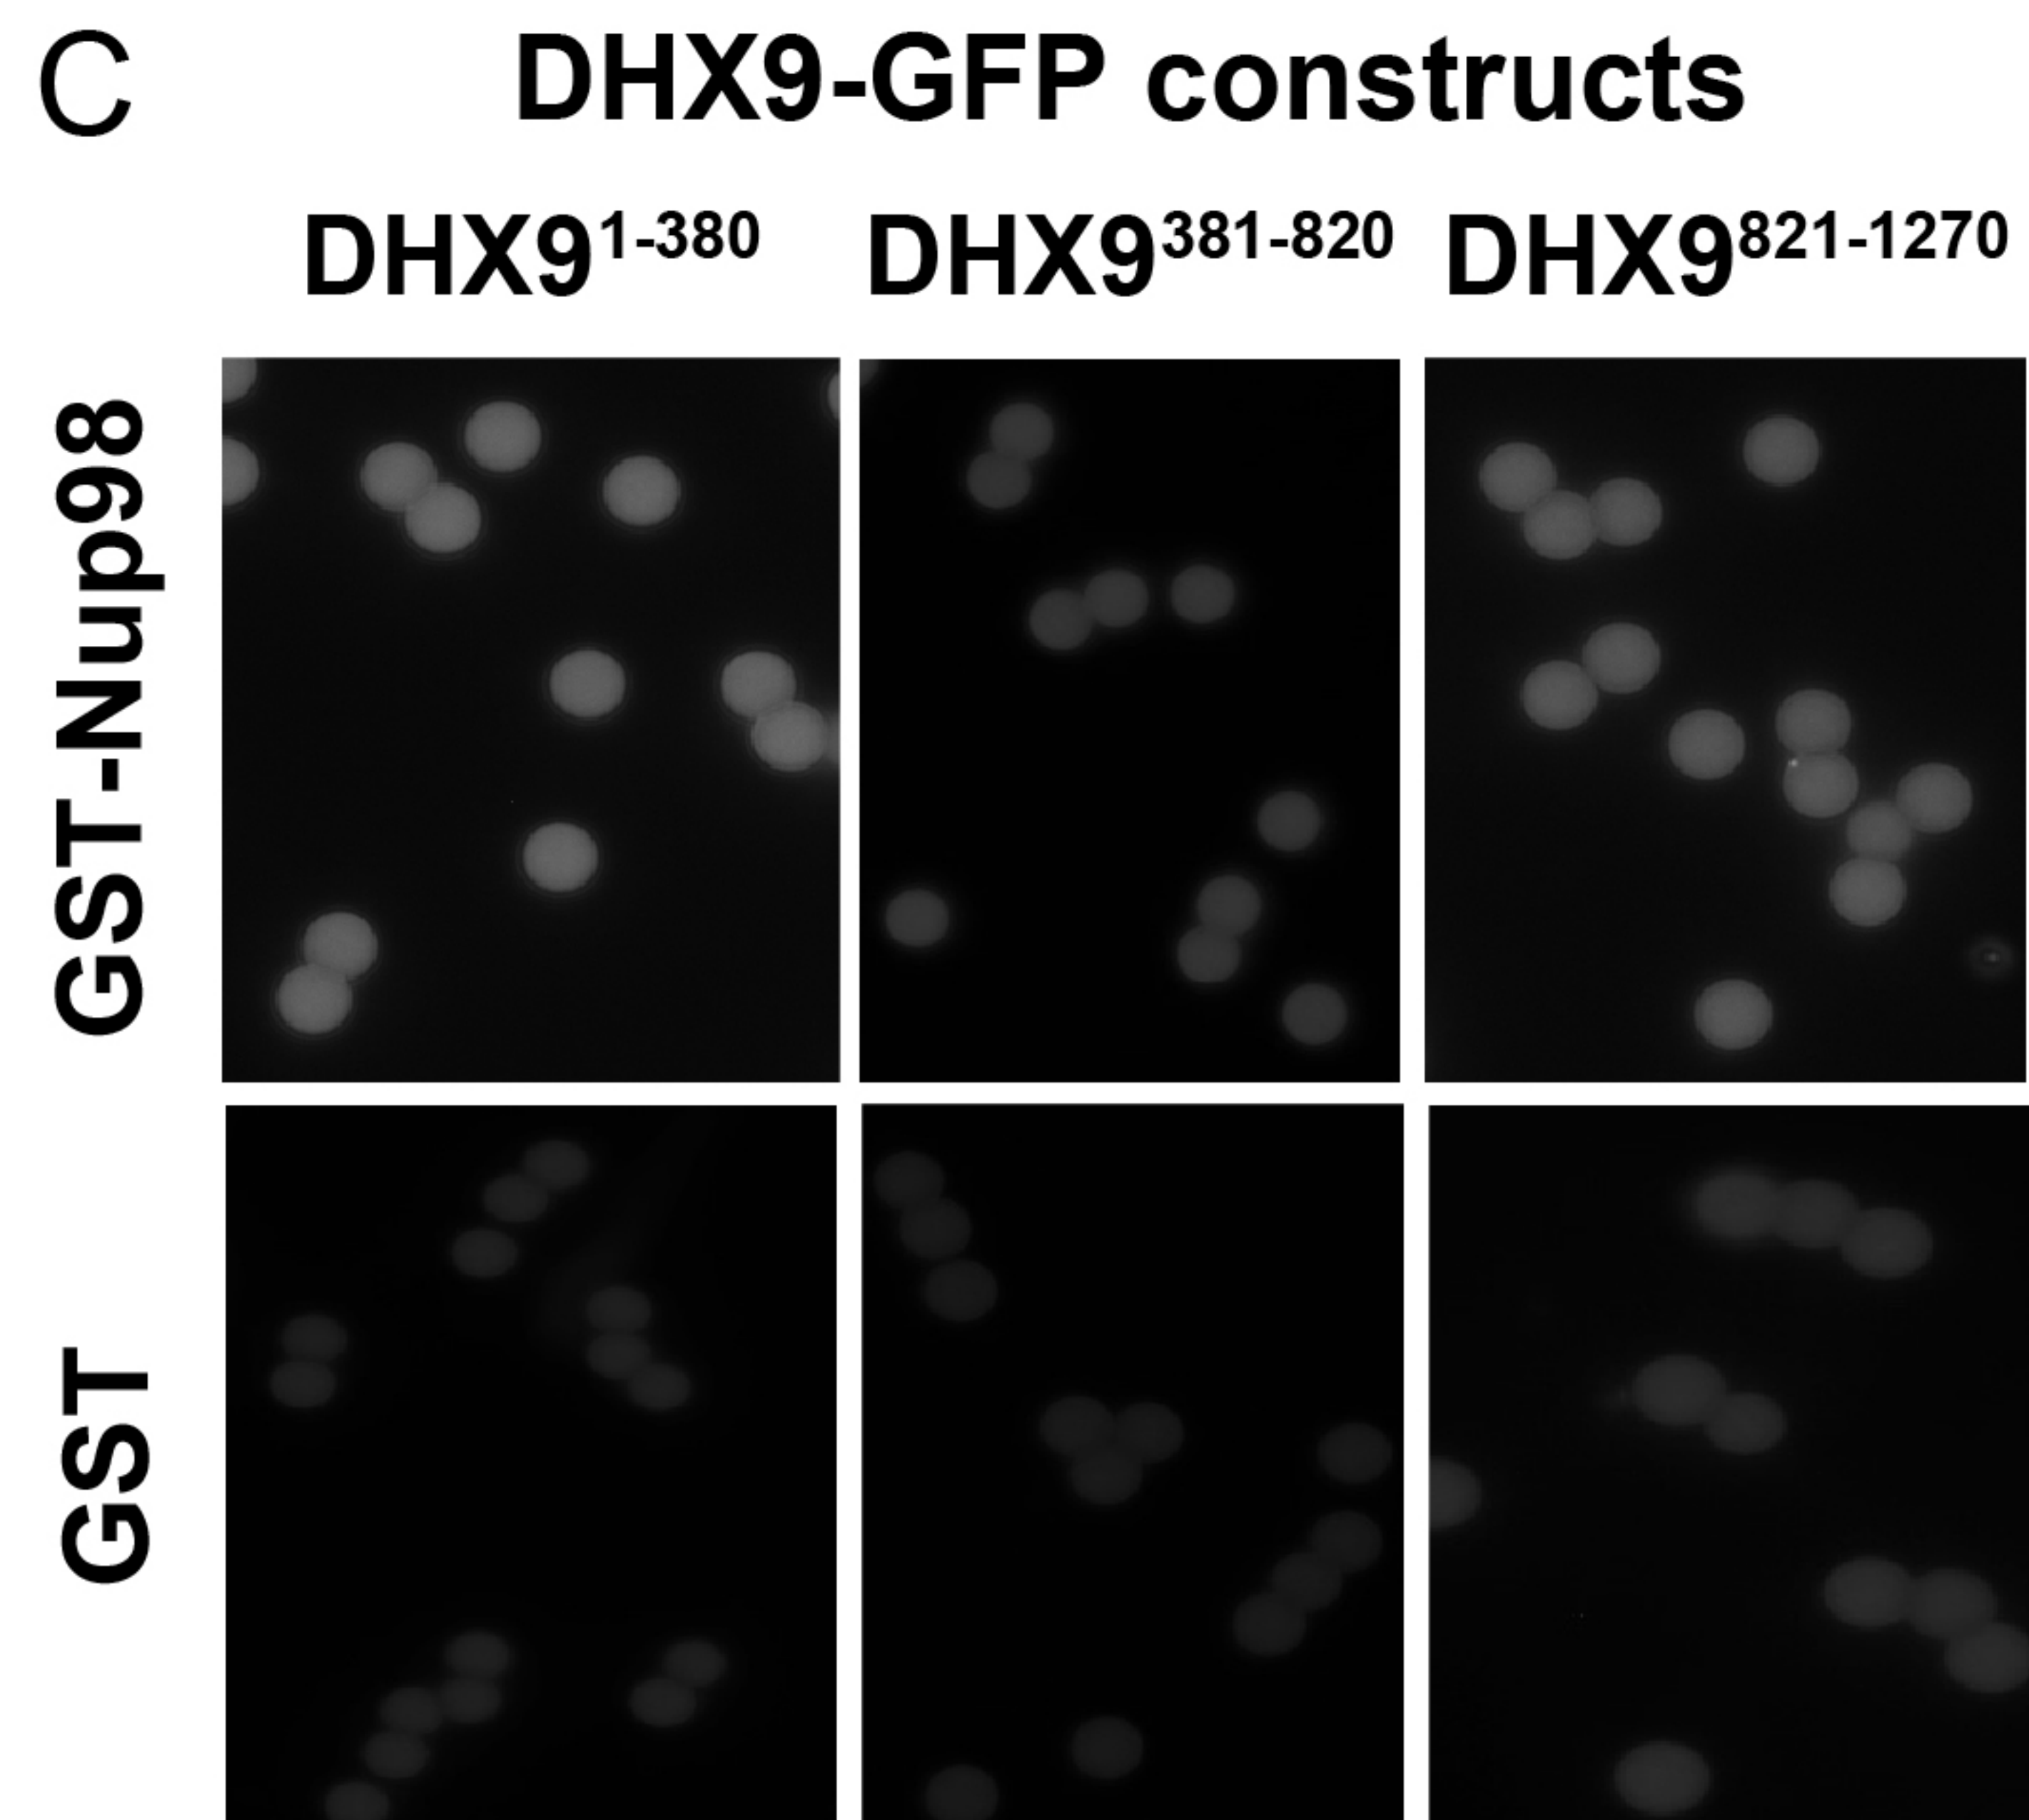

Supplement: supp [file elife-18825-supp-v1.zip]
